# Supplementary material
Source: PubMed Central journal article supplement (PMC7055584)

**Enantioconvergent Alkylations of Amines by Alkyl Electrophiles:  
Copper-Catalyzed Nucleophilic Substitutions of Racemic  $\alpha$ -Halolactams by Indoles**

Agnieszka Bartoszewicz, Carson D. Matier, and Gregory C. Fu\*

Division of Chemistry and Chemical Engineering, California Institute of Technology,  
Pasadena, California 91125, United States

**Supporting Information**

**Table of Contents**

|              |                                                                   |             |
|--------------|-------------------------------------------------------------------|-------------|
| <b>I.</b>    | <b>General Information</b>                                        | <b>S-2</b>  |
| <b>II.</b>   | <b>Preparation of Electrophiles</b>                               | <b>S-3</b>  |
| <b>III.</b>  | <b>Copper-Catalyzed Enantioconvergent Alkylations</b>             | <b>S-9</b>  |
| <b>IV.</b>   | <b>Time-Course Experiments (Figures 5 and 6)</b>                  | <b>S-27</b> |
| <b>V.</b>    | <b>Synthesis and Reactivity of Copper Complex B (from (R)-L*)</b> | <b>S-28</b> |
| <b>VI.</b>   | <b>Study of Non-Linear Effects</b>                                | <b>S-30</b> |
| <b>VII.</b>  | <b>X-Ray Crystallography, Including Absolute Configuration</b>    | <b>S-31</b> |
| <b>VIII.</b> | <b>NMR Spectra</b>                                                | <b>S-77</b> |

## I. General Information

Ligand (*R*)-L\*, ligand (*S*)-L\*, and mesitylcopper were purchased from Strem Chemicals. Cs<sub>2</sub>CO<sub>3</sub> (99.995%) was purchased from Acros Organics. *m*-Xylene (anhydrous, ≥99%) was purchased from Sigma-Aldrich. Unless otherwise noted, materials were purchased from commercial suppliers and used as received.

Microwave-assisted syntheses were performed using a Biotage® Initiator 2.5 microwave reactor.

Silicycle SiliaFlash® P60 Silica gel (particle size 40–63 nm) was used for flash chromatography. Biotage® KP-C18-HS support gel (particle size 30–90 μm) was used for reverse-phase flash chromatography. Preparative thin-layer chromatography (TLC) was performed on EDM/Merck TLC Silica gel 60 F<sub>254</sub> pre-coated plates (0.25 mm).

Analytical HPLC analyses were carried out using an Agilent 1100 Series system with Daicel CHIRALPAK® columns (internal diameter 4.6 mm, column length 25.0 cm, particle size 5 μm). Analytical SFC was performed with a Thar SFC supercritical CO<sub>2</sub> analytical chromatography system with CHIRALPAK® columns (internal diameter 4.6 mm, column length 25.0 cm, particle size 5 μm). Preparative HPLC separations were carried out using an Agilent 1100 Series system with a Daicel CHIRALPAK® IC column (internal diameter 2.0 cm, column length 25.0 cm, particle size 5 μm).

<sup>1</sup>H, <sup>13</sup>C, and <sup>31</sup>P NMR spectra were recorded on a Bruker Ascend 400 (at 400 MHz, 101 MHz, and 162 MHz, respectively), relative to CHCl<sub>3</sub> (<sup>1</sup>H, δ 7.26; internal), CDCl<sub>3</sub> (<sup>13</sup>C, δ 77.0; internal), and 85% H<sub>3</sub>PO<sub>4</sub> (<sup>31</sup>P, δ 0; external) references. <sup>13</sup>C NMR spectra of phosphorus-containing compounds were recorded on a Varian Inova 600 (151 MHz) with <sup>1</sup>H and <sup>31</sup>P decoupling. Data for <sup>1</sup>H NMR spectra are reported as follows: chemical shift (δ) (multiplicity, coupling constant (Hz), integration). Multiplicity and qualifier abbreviations are as follows: s = singlet, d = doublet, t = triplet, q = quartet, m = multiplet, br = broad, app = apparent.). IR spectra were recorded on a Perkin Elmer Spectrum BXII spectrometer using thin films deposited on NaCl plates and are reported in wavenumbers (cm<sup>-1</sup>). Optical rotations were measured on a Jasco P-2000 polarimeter operating at the sodium D-line (589 nm), using a 100 mm path-length cell. HR-MS were acquired using an Agilent 6200 Series TOF with an Agilent G1978A multimode source in electrospray ionization (ESI) mode and a JEOL MSRoute JMS-600H mass spectrometer using fast atom bombardment (FAB).

## II. Preparation of Electrophiles

The yields have not been optimized.

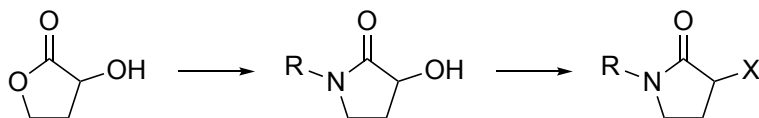

**Method A.**  $\alpha$ -Hydroxy- $\gamma$ -butyrolactone (10.0 mmol), the amine (12.0 mmol, 1.2 equiv), and *p*-toluenesulfonic acid (1.0 mmol, 10 mol%) were placed in a 10 mL microwave vial and stirred at 220 °C for 10 min under microwave heating. The reaction mixture was then dissolved in CH<sub>2</sub>Cl<sub>2</sub> (200 mL) and washed in turn with aqueous HCl (5 M), saturated aqueous NaHCO<sub>3</sub>, and brine. The organic layer was dried over magnesium sulfate and concentrated to give the  $\alpha$ -hydroxy- $\gamma$ -lactam, which was used without further purification in the subsequent step.

A solution of PPh<sub>3</sub> (13.0 mmol, 1.3 equiv) in CH<sub>2</sub>Cl<sub>2</sub> (100 mL) was cooled to 0 °C, and then either iodine or bromine (12.0 mmol, 1.2 equiv) was added. After 10 min of stirring, imidazole (13.0 mmol, 1.3 equiv) and the  $\alpha$ -hydroxy- $\gamma$ -lactam (10.0 mmol) were added. The reaction mixture was allowed to slowly warm to room temperature, and it was stirred at room temperature for 4 h. The reaction mixture was then washed with water, and the organic layer was dried over magnesium sulfate and concentrated. The residue was purified by column chromatography, using hexanes/Et<sub>2</sub>O as the eluant.

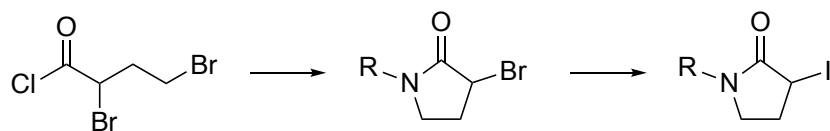

**Method B.** 2,4-Dibromobutyryl chloride (10.0 mmol) was added over 10 min to a suspension of the amine (10.0 mmol, 1.0 equiv) and potassium phosphate tribasic (5.0 mmol, 0.5 equiv) in acetonitrile (50 mL) at 0 °C. The reaction mixture was stirred for 1 h, and then aqueous NaOH (50%; 2 mL) was added, and the reaction mixture was stirred overnight. The mixture was then filtered, the solid was washed with CH<sub>2</sub>Cl<sub>2</sub> (100 mL), and the combined organic layers were concentrated. The residue was purified by column chromatography, using hexanes/Et<sub>2</sub>O as the eluant.

Next, the  $\alpha$ -bromo- $\gamma$ -lactam (10.0 mmol) was added to a suspension of NaI (15.0 mmol, 1.5 equiv) in acetone (50 mL). After 2 h of stirring at room temperature, the reaction mixture was concentrated, and the residue was purified by column chromatography, using hexanes/Et<sub>2</sub>O as the eluant.

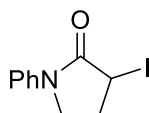

**3-Iodo-1-phenylpyrrolidin-2-one.** The title compound was prepared according to Method B (second step) from 3-bromo-1-phenylpyrrolidin-2-one. After purification by flash

chromatography (30→60% Et<sub>2</sub>O in hexanes), the title compound was isolated as a white solid in 85% yield.

<sup>1</sup>H NMR (400 MHz, CDCl<sub>3</sub>) δ 7.89 – 7.55 (m, 2H), 7.55 – 7.35 (m, 2H), 7.26 – 7.13 (m, 1H), 4.75 (dd, *J* = 7.1, 2.0 Hz, 1H), 3.97 (ddd, *J* = 9.9, 8.7, 6.3 Hz, 1H), 3.77 (ddd, *J* = 9.8, 7.7, 1.9 Hz, 1H), 2.83 – 2.52 (m, 1H), 2.41 (ddt, *J* = 14.4, 6.2, 1.9 Hz, 1H).

<sup>13</sup>C NMR (101 MHz, CDCl<sub>3</sub>) δ 171.4, 139.1, 129.0, 125.3, 120.0, 47.3, 31.4, 20.9.

FT-IR (thin film): 2946, 1694, 1597, 1494, 1476, 1393, 1300, 1224, 1116, 1035, 875, 762 cm<sup>-1</sup>.

HR-MS: *m/z* 287.9878 ([M+H]<sup>+</sup>, C<sub>10</sub>H<sub>11</sub>INO<sup>+</sup> calcd. 287.9885).

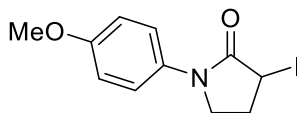

**3-Iodo-1-(4-methoxyphenyl)pyrrolidin-2-one.** The title compound was prepared according to Method B from 2,4-dibromobutyryl chloride and *p*-anisidine. After purification by flash chromatography (30→70% Et<sub>2</sub>O in hexanes), the title compound was isolated as a white solid in 48% yield over 2 steps.

<sup>1</sup>H NMR (400 MHz, CDCl<sub>3</sub>) δ 7.59 – 7.37 (m, 2H), 7.01 – 6.84 (m, 2H), 4.71 (dd, *J* = 7.1, 2.0 Hz, 1H), 3.89 (ddd, *J* = 10.0, 8.7, 6.2 Hz, 1H), 3.81 (s, 3H), 3.69 (ddd, *J* = 9.8, 7.7, 1.9 Hz, 1H), 2.75 – 2.49 (m, 1H), 2.37 (ddt, *J* = 14.5, 6.3, 1.9 Hz, 1H).

<sup>13</sup>C NMR (101 MHz, CDCl<sub>3</sub>) δ 171.1, 157.1, 132.3, 121.8, 114.2, 55.5, 47.8, 31.5, 21.1.

FT-IR (thin film): 2915, 1698, 1512, 1463, 1395, 1369, 1290, 1248, 1178, 1099, 1031, 828, 740 cm<sup>-1</sup>.

HR-MS: *m/z* 317.9985 ([M+H]<sup>+</sup>, C<sub>11</sub>H<sub>13</sub>INO<sub>2</sub><sup>+</sup> calcd. 317.9991).

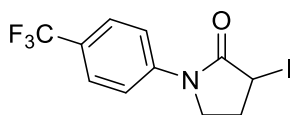

**3-Iodo-1-(4-(trifluoromethyl)phenyl)pyrrolidin-2-one.** The title compound was prepared according to Method B from 2,4-dibromobutyryl chloride and 4-(trifluoromethyl)aniline. After purification by flash chromatography (20→50% Et<sub>2</sub>O in hexanes), the title compound was isolated as a yellow solid in 53% yield over 2 steps.

<sup>1</sup>H NMR (400 MHz, CDCl<sub>3</sub>) δ 7.97 – 7.73 (m, 2H), 7.77 – 7.55 (m, 2H), 4.77 (dd, *J* = 7.0, 2.1 Hz, 1H), 4.00 (td, *J* = 9.3, 6.3 Hz, 1H), 3.81 (ddd, *J* = 9.8, 7.7, 1.9 Hz, 1H), 2.87 – 2.48 (m, 1H), 2.43 (ddt, *J* = 14.5, 6.3, 2.0 Hz, 1H).

<sup>13</sup>C NMR (101 MHz, CDCl<sub>3</sub>) δ 171.9, 142.5, 126.7 (q, *J* = 32.8 Hz), 126.2 (q, *J* = 3.8 Hz), 124.0 (q, *J* = 271.6 Hz), 119.4, 47.0, 31.1, 20.0.

FT-IR (thin film): 2883, 1703, 1614, 1520, 1479, 1428, 1390, 1320, 1303, 1224, 1120, 1069, 1018, 879, 839 cm<sup>-1</sup>.

HR-MS: *m/z* 355.9756 ([M+H]<sup>+</sup>, C<sub>11</sub>H<sub>10</sub>F<sub>3</sub>INO<sup>+</sup> calcd. 355.9759).

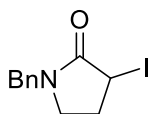

**1-Benzyl-3-iodopyrrolidin-2-one.** The title compound was prepared according to Method B from  $\alpha$ -hydroxy- $\gamma$ -butyrolactone and benzyl amine. After purification by flash chromatography (30 $\rightarrow$ 90% Et<sub>2</sub>O in hexanes), the title compound was isolated as a yellow oil in 51% yield over 2 steps.

<sup>1</sup>H NMR (400 MHz, CDCl<sub>3</sub>)  $\delta$  7.45 – 7.09 (m, 5H), 4.60 (dd,  $J$  = 7.3, 1.9 Hz, 1H), 4.53 (d,  $J$  = 14.7 Hz, 1H), 4.39 (d,  $J$  = 14.7 Hz, 1H), 3.28 (ddd,  $J$  = 10.2, 8.4, 6.3 Hz, 1H), 3.11 (ddd,  $J$  = 9.9, 7.8, 1.8 Hz, 1H), 2.55 – 2.38 (m, 1H), 2.24 (ddt,  $J$  = 14.5, 6.4, 1.8 Hz, 1H).

<sup>13</sup>C NMR (101 MHz, CDCl<sub>3</sub>)  $\delta$  172.5, 135.7, 128.8, 128.1, 127.8, 47.3, 45.2, 31.7, 19.8.

FT-IR (thin film): 3026, 2916, 1690, 1494, 1423, 1358, 1306, 1267, 1125, 1082, 1028, 878, 751 cm<sup>-1</sup>.

HR-MS:  $m/z$  302.0045 ([M+H]<sup>+</sup>, C<sub>11</sub>H<sub>13</sub>INO<sup>+</sup> calcd. 302.0042).

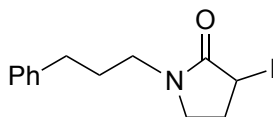

**3-Iodo-1-(3-phenylpropyl)pyrrolidin-2-one.** The title compound was prepared according to Method A (second step) from 3-hydroxy-1-(3-phenylpropyl)pyrrolidin-2-one. After purification by flash chromatography (40 $\rightarrow$ 80% Et<sub>2</sub>O in hexanes), the title compound was isolated as a yellow oil in 65% yield.

<sup>1</sup>H NMR (400 MHz, CDCl<sub>3</sub>)  $\delta$  7.41 – 7.09 (m, 5H), 4.54 (dd,  $J$  = 7.1, 1.8 Hz, 1H), 3.51 – 3.39 (m, 2H), 3.29 (dt,  $J$  = 13.8, 7.1 Hz, 1H), 3.20 (ddd,  $J$  = 9.8, 7.7, 1.7 Hz, 1H), 2.80 – 2.55 (m, 2H), 2.52 – 2.31 (m, 1H), 2.26 (ddt,  $J$  = 14.4, 6.3, 1.8 Hz, 1H), 1.93 (p,  $J$  = 7.5 Hz, 2H).

<sup>13</sup>C NMR (101 MHz, CDCl<sub>3</sub>)  $\delta$  172.6, 141.3, 128.5, 128.3, 126.1, 45.7, 43.0, 33.0, 31.8, 28.6, 20.2.

FT-IR (thin film): 3056, 2929, 1691, 1590, 1483, 1435, 1308, 1279, 1194, 1118, 1070, 1028, 997, 880, 754, 722 cm<sup>-1</sup>.

HR-MS:  $m/z$  330.0354 ([M+H]<sup>+</sup>, C<sub>13</sub>H<sub>17</sub>INO<sup>+</sup> calcd. 330.0355).

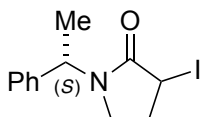

The diastereomers are formed in a 1:1 mixture, and they were used as such in the experiment described in Figure 4. For the purpose of characterization, they were separated by column chromatography.

**3-Iodo-1-(1-phenylethyl)pyrrolidin-2-one.** The title compound was prepared according to Method A from  $\alpha$ -hydroxy- $\gamma$ -butyrolactone and (*S*)-1-phenylethylamine. After purification by flash chromatography (30 $\rightarrow$ 80% Et<sub>2</sub>O in hexanes), the title compounds were isolated as white solids in 27% and 29% yield over 2 steps.

**Diastereomer 1:**

$^1\text{H}$  NMR (400 MHz,  $\text{CDCl}_3$ )  $\delta$  7.50 – 7.29 (m, 5H), 5.46 (q,  $J = 7.1$  Hz, 1H), 4.59 (dd,  $J = 6.8$ , 1.8 Hz, 1H), 3.53 – 3.17 (m, 1H), 3.05 – 2.72 (m, 1H), 2.42 – 2.06 (m, 2H), 1.55 (d,  $J = 7.1$  Hz, 3H).

$^{13}\text{C}$  NMR (101 MHz,  $\text{CDCl}_3$ )  $\delta$  172.1, 139.7, 128.6, 127.7, 127.1, 50.0, 41.0, 31.7, 20.9, 14.8.

FT-IR (thin film): 3025, 2969, 2934, 1670, 1478, 1440, 1425, 1344, 1309, 1282, 1227, 1178, 1129, 1053, 784, 701  $\text{cm}^{-1}$ .

$[\alpha]^{25}_{\text{D}}$  (100% ee):  $-110^\circ$  ( $c = 1.0$ ,  $\text{CHCl}_3$ ).

HR-MS:  $m/z$  316.0196 ( $[\text{M}+\text{H}]^+$ ,  $\text{C}_{12}\text{H}_{15}\text{INO}^+$  calcd. 316.0198).

#### Diastereomer 2:

$^1\text{H}$  NMR (400 MHz,  $\text{CDCl}_3$ )  $\delta$  7.50 – 7.29 (m, 5H), 5.50 (q,  $J = 7.1$  Hz, 1H), 4.61 (dd,  $J = 7.2$ , 1.9 Hz, 1H), 3.22 – 3.09 (m, 1H), 3.00 – 2.84 (m, 1H), 2.62 – 2.38 (m, 1H), 2.20 (ddt,  $J = 14.4$ , 6.3, 1.8 Hz, 1H), 1.60 (d,  $J = 7.1$  Hz, 3H).

$^{13}\text{C}$  NMR (101 MHz,  $\text{CDCl}_3$ )  $\delta$  172.0, 139.1, 128.7, 127.7, 127.1, 49.5, 41.0, 31.7, 20.6, 16.2.

FT-IR (thin film): 3027, 2982, 2875, 1673, 1485, 1449, 1419, 1346, 1305, 1277, 1223, 1178, 1117, 877, 699, 657  $\text{cm}^{-1}$ .

$[\alpha]^{25}_{\text{D}}$  (100% ee):  $-140^\circ$  ( $c = 1.0$ ,  $\text{CHCl}_3$ ).

HR-MS:  $m/z$  316.0189 ( $[\text{M}+\text{H}]^+$ ,  $\text{C}_{12}\text{H}_{15}\text{INO}^+$  calcd. 316.0198).

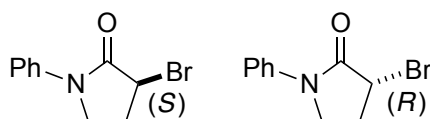

**(3S)-3-Bromo-1-phenylpyrrolidin-2-one and (3R)-3-bromo-1-phenylpyrrolidin-2-one [77868-83-8].** A racemic mixture of the title compounds was prepared similarly to a procedure described in the literature (Method B).<sup>1</sup> The pure enantiomers of the title compound were obtained from the racemate by separation on a preparative Diacel CHIRALPAK® IC column; 45% *i*-PrOH in hexanes, 10.0 mL/min flow-rate; retention times: 24.9 min (*S*-enantiomer), 32.8 min (*R*-enantiomer).

$^1\text{H}$  NMR (400 MHz,  $\text{CDCl}_3$ )  $\delta$  7.73 – 7.61 (m, 2H), 7.50 – 7.34 (m, 2H), 7.27 – 7.18 (m, 1H), 4.62 (dd,  $J = 7.0$ , 2.8 Hz, 1H), 4.09 (ddd,  $J = 9.8$ , 7.9, 6.6 Hz, 1H), 3.86 (ddd,  $J = 10.1$ , 7.8, 2.6 Hz, 1H), 2.88 – 2.61 (m, 1H), 2.49 (ddt,  $J = 14.3$ , 6.6, 2.7 Hz, 1H).

(*S*)-enantiomer  $[\alpha]^{25}_{\text{D}}$  (100% ee):  $117^\circ$  ( $c = 1.0$ ,  $\text{CHCl}_3$ ).

(*R*)-enantiomer  $[\alpha]^{25}_{\text{D}}$  (100% ee):  $-118^\circ$  ( $c = 1.0$ ,  $\text{CHCl}_3$ ).

(1) Lin, X.; Chen, W.; Qiu, Z.; Guo, L.; Zhu, W.; Li, W.; Wang, Z.; Zhang, W.; Zhang, Z.; Rong, Y.; Zhang, M.; Yu, L.; Zhong, S.; Zhao, R.; Wu, X.; Wong, J. C.; Tang, G. Design and Synthesis of Orally Bioavailable Aminopyrrolidinone Histone Deacetylase 6 Inhibitors. *J. Med. Chem.* **2015**, *58*, 2809–2820.

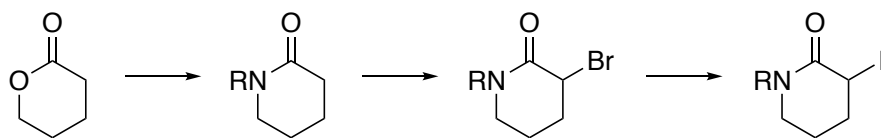

**Method C.**  $\delta$ -Valerolactone (10.0 mmol), the amine (12.0 mmol, 1.2 equiv), and *p*-toluenesulfonic acid (1.0 mmol, 10 mol%) were placed in a 10 mL microwave vial and stirred at 220 °C for 10 min under microwave heating. The reaction mixture was then dissolved in  $\text{CH}_2\text{Cl}_2$  (200 mL) and washed in turn with aqueous HCl (5 M), saturated aqueous  $\text{NaHCO}_3$ , and brine. The organic layer was dried over magnesium sulfate and concentrated to give a residue that was purified by column chromatography, using hexanes/ $\text{Et}_2\text{O}$  as the eluent, to give the  $\delta$ -lactam.

Next, *s*-BuLi (1.0 M in hexanes; 11.0 mL) was added to a solution of the  $\delta$ -lactam (10.0 mmol) in THF (200 mL) at -78 °C. The reaction mixture was stirred for 30 min, and then it was further cooled to -100 °C, and bromine (10.0 mmol, 1.0 equiv) was added dropwise over 2 min. The reaction was then immediately quenched at -100 °C by the addition of water (10 mL). The reaction mixture was allowed to slowly warm to room temperature, and then it was washed with aqueous sodium thiosulfate and then with aqueous ammonium chloride. The organic layer was dried over magnesium sulfate and concentrated, and the residue was purified by column chromatography, using hexanes/ $\text{Et}_2\text{O}$  as the eluent.

Next, the  $\alpha$ -bromo- $\delta$ -lactam (10.0 mmol) was added to a suspension of NaI (15.0 mmol, 1.5 equiv) in acetone (50 mL). After 2 h of stirring at room temperature, the reaction was concentrated, and the residue was purified by column chromatography, using hexanes/ $\text{Et}_2\text{O}$  as the eluent.

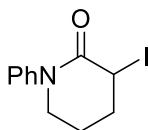

**3-Iodo-1-phenylpiperidin-2-one.** The title compound was prepared according to Method C from  $\delta$ -valerolactone and aniline. In the first step, 1-phenylpiperidin-2-one was obtained in 58% yield. In the second step, after purification by flash chromatography (50→90%  $\text{Et}_2\text{O}$  in hexanes), 3-bromo-1-phenylpiperidin-2-one was obtained in 53% yield. In the third step, after purification by flash chromatography (50→90%  $\text{Et}_2\text{O}$  in hexanes), the title compound was obtained in 92% yield as a white solid.

$^1\text{H}$  NMR (400 MHz,  $\text{CDCl}_3$ )  $\delta$  7.49 – 7.37 (m, 2H), 7.31 – 7.24 (m, 3H), 5.00 (ddd,  $J$  = 4.7, 3.2, 1.4 Hz, 1H), 3.94 (ddd,  $J$  = 12.1, 10.9, 5.0 Hz, 1H), 3.76 (dddd,  $J$  = 12.2, 5.7, 3.3, 1.4 Hz, 1H), 2.60 – 2.40 (m, 1H), 2.42 – 2.29 (m, 1H), 2.32 – 2.17 (m, 1H), 2.05 – 1.92 (m, 1H).

$^{13}\text{C}$  NMR (101 MHz,  $\text{CDCl}_3$ )  $\delta$  167.9, 142.9, 129.1, 127.0, 125.6, 51.2, 32.7, 23.5, 21.0.

FT-IR (thin film): 2946, 1651, 1595, 1492, 1417, 1346, 1310, 1240, 1173, 763  $\text{cm}^{-1}$ .

HR-MS:  $m/z$  302.0051 ( $[\text{M}+\text{H}]^+$ ,  $\text{C}_{11}\text{H}_{13}\text{INO}^+$  calcd. 302.0042).

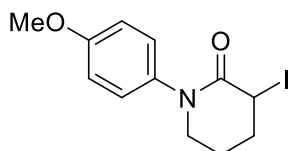

**3-Iodo-1-(4-methoxyphenyl)piperidin-2-one.** The title compound was prepared according to Method C from 3-bromo-1-(4-methoxyphenyl)piperidin-2-one. After purification by flash chromatography (50→100% Et<sub>2</sub>O in hexanes), the title product was obtained in 71% yield as a white solid.

<sup>1</sup>H NMR (400 MHz, CDCl<sub>3</sub>) δ 7.23 – 7.10 (m, 2H), 7.03 – 6.78 (m, 2H), 4.99 (ddd, *J* = 4.7, 3.1, 1.4 Hz, 1H), 3.89 (ddd, *J* = 12.3, 10.9, 5.0 Hz, 1H), 3.83 (s, 3H), 3.76 – 3.67 (m, 1H), 2.55 – 2.39 (m, 1H), 2.39 – 2.29 (m, 1H), 2.29 – 2.14 (m, 1H), 2.07 – 1.92 (m, 1H).

<sup>13</sup>C NMR (101 MHz, CDCl<sub>3</sub>) δ 168.0, 158.2, 135.7, 126.8, 114.4, 55.5, 51.5, 32.7, 23.6, 21.0.

FT-IR (thin film): 2953, 2833, 1651, 1605, 1510, 1440, 1345, 1317, 1298, 1241, 1173, 1148, 1032, 830 cm<sup>-1</sup>.

HR-MS: *m/z* 332.0160 ([M+H]<sup>+</sup>, C<sub>12</sub>H<sub>15</sub>INO<sub>2</sub><sup>+</sup> calcd. 332.0147).



### III. Copper-Catalyzed Enantioconvergent Alkylations

**General Procedure.** In a nitrogen-filled glovebox, an oven-dried 4 mL amber-glass vial was charged with the nucleophile (0.250 mmol) and a solution of mesitylcopper<sup>2</sup> (4.6 mg, 0.025 mmol) in *m*-xylene (500  $\mu$ L). A stir bar was added, and the vial was closed with a screw cap. The mixture was stirred for 10 min, and then a solution of (*R*)-L\* (17.7 mg, 0.050 mmol) in *m*-xylene (500  $\mu$ L) was added, and the vial was re-capped. The mixture was stirred for 10 min, and then the electrophile (0.375 mmol) was added. The reaction mixture became homogeneous after ~5 min, at which time Cs<sub>2</sub>CO<sub>3</sub> (0.250–0.400 mmol) was added. The vial was re-capped and wrapped thoroughly with electrical tape in order to keep the reaction in the dark. The vial was removed from the glovebox, and the reaction mixture was stirred vigorously (1500 rpm; adequate stirring is necessary in order to achieve full conversion) at ~23–26 °C (because lower ee is observed at higher temperature, the vial was suspended above the magnetic stirrer, and a fan was used to avoid heating by the magnetic stirrer (Figure S–1)). After the indicated time, the reaction mixture was directly transferred to the top of a column of silica gel; the reaction vial was washed with toluene (2 mL) and then CH<sub>2</sub>Cl<sub>2</sub> (1 mL), and the washings were also applied to the top of the column. The product was purified by column chromatography, using the indicated solvent system.

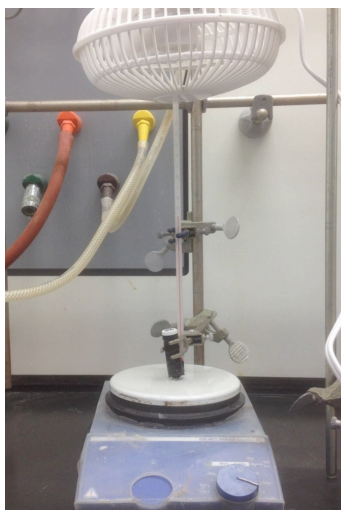

**Figure S–1.** Reaction setup.

- 
- (2) Mesitylcopper can be purchased from Strem Chemicals or prepared using a previously described procedure: Tsuda, T.; Yazawa, T.; Watanabe, K.; Fujii, T.; Saegusa, T. Preparation of Thermally Stable and Soluble Mesitylcopper(I) and Its Application in Organic Synthesis. *J. Org. Chem.* **1981**, *46*, 192–194.

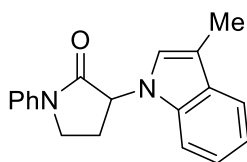

**3-(3-Methyl-1H-indol-1-yl)-1-phenylpyrrolidin-2-one (Table 2, entry 1).** The title compound was prepared according to the General Procedure from 3-iodo-1-phenylpyrrolidin-2-one (108 mg, 0.375 mmol) and 3-methyl-1H-indole (32.8 mg, 0.250 mmol), using 10 mol% of mesitylcopper, 20 mol% of (*R*)-L\*, and 1.8 equiv of Cs<sub>2</sub>CO<sub>3</sub> (147 mg, 0.450 mmol). The reaction was run for 72 h at 23-25 °C. After purification by flash chromatography (20→50% Et<sub>2</sub>O in hexanes) and reverse phase chromatography (0→60% MeOH in H<sub>2</sub>O), the title compound was isolated as a white solid in 72% yield (52 mg) and 86% ee.

The second run was performed with (*S*)-L\*. The product was isolated as a white solid in 74% yield (54 mg) and 89% ee.

HPLC analysis of the product: Diacel CHIRALPAK® IC column; 35% *i*-PrOH in hexanes, 1.0 mL/min flow-rate; retention times: 22.5 min (minor), 26.5 min (major) for (*R*)-L\*.

<sup>1</sup>H NMR (400 MHz, CDCl<sub>3</sub>) δ 7.91 – 7.67 (m, 2H), 7.62 – 7.60 (m, 1H), 7.53 – 7.35 (m, 2H), 7.30 – 7.27 (m, 1H), 7.27 – 7.21 (m, 2H), 7.18 – 7.14 (m, 1H), 6.97 (q, *J* = 1.1 Hz, 1H), 5.31 (dd, *J* = 10.1, 8.7 Hz, 1H), 4.06 – 3.96 (m, 2H), 2.88 – 2.74 (m, 1H), 2.53 – 2.37 (m, 1H), 2.36 (d, *J* = 1.1 Hz, 3H).

<sup>13</sup>C NMR (101 MHz, CDCl<sub>3</sub>) δ 169.8, 139.1, 136.4, 129.3, 129.1, 125.2, 123.4, 121.9, 119.8, 119.4, 119.3, 112.4, 109.1, 57.9, 45.0, 26.5, 9.7.

FT-IR (thin film): 3045, 2915, 1704, 1598, 1500, 1462, 1394, 1370, 1307, 1237, 1199, 758, 739, 691 cm<sup>-1</sup>.

[α]<sup>25</sup><sub>D</sub> = -54° (c = 1.0, CHCl<sub>3</sub>); 86% ee from (*R*)-L\*.

HR-MS: *m/z* 291.1495 ([M+H]<sup>+</sup>, C<sub>19</sub>H<sub>19</sub>N<sub>2</sub>O<sup>+</sup> calcd. 291.1497).

**Eq 1.** The title compound was also prepared using 3-bromo-1-phenylpyrrolidin-2-one (90.0 mg, 0.375 mmol) and was isolated in 58% yield (42 mg) and 88% ee with (*R*)-L\* and in 63% yield (46 mg) and 87% ee with (*S*)-L\*.

**Eq 1.** The title compound was also prepared using 3-bromo-1-phenylpyrrolidin-2-one (120 mg, 0.50 mmol) and was isolated in 83% yield (60 mg) and 88% ee with (*R*)-L\* and in 87% yield (63 mg) and 86% ee with (*S*)-L\*.

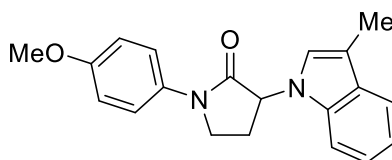

**1-(4-Methoxyphenyl)-3-(3-methyl-1H-indol-1-yl)pyrrolidin-2-one (Table 2, entry 2).** The title compound was prepared according to the General Procedure from 3-iodo-1-(4-methoxyphenyl)pyrrolidin-2-one (119 mg, 0.375 mmol) and 3-methyl-1H-indole (32.8 mg, 0.250 mmol), using 10 mol% of mesitylcopper, 20 mol% of (*R*)-L\*, and 2.2 equiv of Cs<sub>2</sub>CO<sub>3</sub> (179 mg, 0.550 mmol). The reaction was run for 72 h at 23-25 °C. After purification by flash

chromatography (20→80% Et<sub>2</sub>O in hexanes) and reverse phase chromatography (0→70% MeOH in H<sub>2</sub>O), the title compound was isolated as a white solid in 83% yield (66 mg) and 90% ee.

The second run was performed with (*S*)-L\*. The product was isolated as a white solid in 72% yield (58 mg) and 92% ee.

HPLC analysis of the product: Diacel CHIRALPAK® IA column; 30% *i*-PrOH in hexanes, 1.0 mL/min flow-rate; retention times: 27.3 min (minor), 31.4 min (major) for (*R*)-L\*.

<sup>1</sup>H NMR (400 MHz, CDCl<sub>3</sub>) δ 7.72 – 7.58 (m, 3H), 7.37 – 7.11 (m, 3H), 7.03 – 6.91 (m, 3H), 5.27 (dd, *J* = 9.9, 8.7 Hz, 1H), 4.02 – 3.89 (m, 2H), 3.85 (s, 3H), 2.85 – 2.69 (m, 1H), 2.47 – 2.29 (m, 1H), 2.36 (d, *J* = 1.1 Hz, 3H).

<sup>13</sup>C NMR (101 MHz, CDCl<sub>3</sub>) δ 169.4, 157.0, 136.4, 132.3, 129.3, 123.4, 121.8, 121.5, 119.3, 119.2, 114.2, 112.1, 109.1, 57.7, 55.5, 45.3, 26.5, 9.7.

FT-IR (thin film): 3049, 2915, 1697, 1512, 1463, 1395, 1290, 1249, 1179, 1032, 828, 740 cm<sup>-1</sup>.

[α]<sub>D</sub><sup>25</sup> = -60° (*c* = 1.0, CHCl<sub>3</sub>); 90% ee from (*R*)-L\*.

HR-MS: *m/z* 321.1601 ([M+H]<sup>+</sup>, C<sub>20</sub>H<sub>21</sub>N<sub>2</sub>O<sub>2</sub><sup>+</sup> calcd. 321.1603).

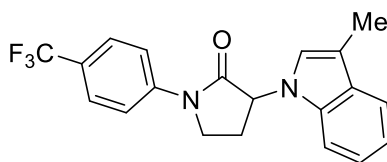

**3-(3-Methyl-1H-indol-1-yl)-1-(4-(trifluoromethyl)phenyl)pyrrolidin-2-one (Table 2, entry 3).** The title compound was prepared according to the General Procedure from 3-iodo-1-(4-(trifluoromethyl)phenyl)pyrrolidin-2-one (133 mg, 0.375 mmol) and 3-methyl-1H-indole (32.8 mg, 0.250 mmol), using 10 mol% of mesitylcopper, 20 mol% of (*R*)-L\*, and 1.8 equiv of Cs<sub>2</sub>CO<sub>3</sub> (147 mg, 0.450 mmol). The reaction was run for 72 h at 23-25 °C. After purification by flash chromatography (20→60% Et<sub>2</sub>O in hexanes) and reverse phase chromatography (0→80% MeOH in H<sub>2</sub>O), the title compound was isolated as a white solid in 75% yield (67 mg) and 90% ee.

The second run was performed with (*S*)-L\*. The product was isolated as a white solid in 71% yield (64 mg) and 91% ee.

HPLC analysis of the product: Diacel CHIRALPAK® IA column; 20% *i*-PrOH in hexanes, 1.0 mL/min flow-rate; retention times: 16.7 min (major), 23.3 min (minor) for (*R*)-L\*.

<sup>1</sup>H NMR (400 MHz, CDCl<sub>3</sub>) δ 7.96 – 7.87 (m, 2H), 7.75 – 7.66 (m, 2H), 7.66 – 7.59 (m, 1H), 7.34 – 7.13 (m, 3H), 6.95 (q, *J* = 1.1 Hz, 1H), 5.33 (dd, *J* = 10.4, 8.8 Hz, 1H), 4.11 – 3.97 (m, 2H), 2.91 – 2.78 (m, 1H), 2.56 – 2.42 (m, 1H), 2.36 (d, *J* = 1.1 Hz, 3H).

<sup>13</sup>C NMR (101 MHz, CDCl<sub>3</sub>) δ 170.3, 141.9, 136.4, 129.3, 126.3, 123.1, 122.0, 119.5, 119.4, 119.2, 112.4, 109.0, 57.8, 44.7, 26.2, 9.7.

FT-IR (thin film): 2920, 1712, 1614, 1520, 1463, 1389, 1322, 1237, 1197, 1165, 1120, 1069, 1015, 840, 740 cm<sup>-1</sup>.

[α]<sub>D</sub><sup>25</sup> = -40° (*c* = 1.0, CHCl<sub>3</sub>); 90% ee from (*R*)-L\*.

HR-MS: *m/z* 359.1371 ([M+H]<sup>+</sup>, C<sub>20</sub>H<sub>18</sub>F<sub>3</sub>N<sub>2</sub>O<sup>+</sup> calcd. 359.1371).

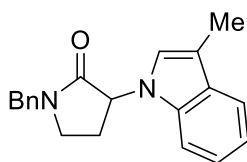

**1-Benzyl-3-(3-methyl-1H-indol-1-yl)pyrrolidin-2-one (Table 2, entry 4).** The title compound was prepared according to the General Procedure from 1-benzyl-3-iodopyrrolidin-2-one (113 mg, 0.375 mmol) and 3-methyl-1H-indole (32.8 mg, 0.250 mmol), using 10 mol% of mesitylcopper, 20 mol% of (*R*)-L\*, and 2.2 equiv of Cs<sub>2</sub>CO<sub>3</sub> (179 mg, 0.550 mmol). The reaction was run for 72 h at 23-25 °C. After purification by flash chromatography (20→80% Et<sub>2</sub>O in hexanes) and reverse phase chromatography (0→100% MeOH in H<sub>2</sub>O), the title compound was isolated as a white solid in 76% yield (58 mg) and 90% ee.

The second run was performed with (*S*)-L\*. The product was isolated as a white solid in 67% yield (51 mg) and 90% ee.

HPLC analysis of the product: Diacel CHIRALPAK® IA column; hexanes:2-propanol/50:50, 1.0 mL/min flow-rate; retention times: 7.9 min (minor), 9.7 min (major) for (*R*)-L\*.

<sup>1</sup>H NMR (400 MHz, CDCl<sub>3</sub>) δ 7.65 – 7.57 (m, 1H), 7.48 – 7.27 (m, 5H), 7.27 – 7.09 (m, 3H), 6.90 (q, *J* = 1.1 Hz, 1H), 5.16 (t, *J* = 9.1 Hz, 1H), 4.71 (d, *J* = 14.5 Hz, 1H), 4.55 (d, *J* = 14.5 Hz, 1H), 3.50 – 3.29 (m, 2H), 2.69 – 2.55 (m, 1H), 2.36 (d, *J* = 1.1 Hz, 3H), 2.17 (dq, *J* = 13.2, 8.9 Hz, 1H).

<sup>13</sup>C NMR (101 MHz, CDCl<sub>3</sub>) δ 170.5, 136.4, 135.9, 129.3, 128.9, 128.5, 128.0, 123.4, 121.7, 119.3, 119.1, 112.0, 109.1, 56.8, 47.5, 43.3, 26.5, 9.7.

FT-IR (thin film): 3028, 2917, 1697, 1494, 1461, 1439, 1357, 1289, 1256, 1233, 739, 700cm<sup>-1</sup>.

[α]<sup>25</sup><sub>D</sub> = -4.2° (c = 1.0, CHCl<sub>3</sub>); 90% ee from (*R*)-L\*.

HR-MS: *m/z* 305.1650 ([M+H]<sup>+</sup>, C<sub>20</sub>H<sub>21</sub>N<sub>2</sub>O<sup>+</sup> calcd. 305.1654).

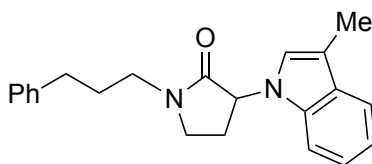

**3-(3-Methyl-1H-indol-1-yl)-1-(3-phenylpropyl)pyrrolidin-2-one (Table 2, entry 5).** The title compound was prepared according to the General Procedure from 3-iodo-1-(3-phenylpropyl)pyrrolidin-2-one (123 mg, 0.375 mmol) and 3-methyl-1H-indole (32.8 mg, 0.250 mmol), using 10 mol% of mesitylcopper, 20 mol% of (*R*)-L\*, and 2.2 equiv of Cs<sub>2</sub>CO<sub>3</sub> (180 mg, 0.550 mmol). The reaction was run for 48 h at 23-25 °C. After purification by flash chromatography (35→100% Et<sub>2</sub>O in hexanes) and reverse phase chromatography (0→70% MeOH in H<sub>2</sub>O), the title compound was isolated as a yellow oil in 85% yield (71 mg) and 83% ee.

The second run was performed with (*S*)-L\*. The product was isolated as a yellow oil in 76% yield (63 mg) and 81% ee.

HPLC analysis of the product: Diacel CHIRALPAK® IA column; 50% *i*-PrOH in hexanes, 1.0 mL/min flow-rate; retention times: 12.5 min (minor), 13.6 min (major) for (*R*)-L\*.

$^1\text{H}$  NMR (400 MHz,  $\text{CDCl}_3$ )  $\delta$  7.68 – 7.56 (m, 1H), 7.45 – 7.33 (m, 2H), 7.33 – 7.20 (m, 5H), 7.21 – 7.10 (m, 1H), 6.89 (q,  $J = 1.1$  Hz, 1H), 5.05 (t,  $J = 9.1$  Hz, 1H), 3.59 – 3.37 (m, 4H), 2.83 – 2.69 (m, 2H), 2.67 – 2.51 (m, 1H), 2.37 (d,  $J = 1.2$  Hz, 3H), 2.23 – 2.06 (m, 1H), 2.09 – 1.91 (m, 2H).

$^{13}\text{C}$  NMR (101 MHz,  $\text{CDCl}_3$ )  $\delta$  170.6, 141.2, 136.5, 129.3, 128.6, 128.4, 126.2, 123.4, 121.7, 119.3, 119.1, 111.9, 109.1, 56.8, 43.9, 43.2, 33.3, 28.8, 26.8, 9.8.

FT-IR (thin film): 3053, 3025, 2926, 2859, 1698, 1494, 1462, 1386, 1368, 1292, 1233, 1199, 739, 700  $\text{cm}^{-1}$ .

$[\alpha]^{25}_{\text{D}} = -42^\circ$  ( $c = 1.0$ ,  $\text{CHCl}_3$ ); 83% ee from (*R*)-**L**\*.

HR-MS:  $m/z$  333.1965 ( $[\text{M}+\text{H}]^+$ ,  $\text{C}_{22}\text{H}_{25}\text{N}_2\text{O}^+$  calcd. 333.1967).

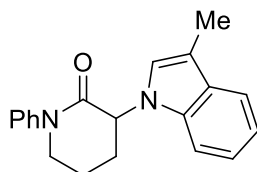

**3-(3-Methyl-1H-indol-1-yl)-1-phenylpiperidin-2-one (Table 2, entry 6).** The title compound was prepared according to the General Procedure from 1-phenyl-3-iodopiperidin-2-one (113 mg, 0.375 mmol) and 3-methyl-1H-indole (32.8 mg, 0.250 mmol), using 10 mol% of mesitylcopper, 20 mol% of (*R*)-**L**\*, and 1.8 equiv of  $\text{Cs}_2\text{CO}_3$  (147 mg, 0.450 mmol). The reaction was run for 48 h at 23–25  $^\circ\text{C}$ . After purification by flash chromatography (20 $\rightarrow$ 80%  $\text{Et}_2\text{O}$  in hexanes) and reverse phase chromatography (0 $\rightarrow$ 70% MeOH in  $\text{H}_2\text{O}$ ), the title compound was isolated as a white solid in 89% yield (68 mg) and 80% ee.

The second run was performed with (*S*)-**L**\*. The product was isolated as a white solid in 86% yield (65 mg) and 80% ee.

HPLC analysis of the product: Diacel CHIRALPAK<sup>®</sup> AD column; 30% *i*-PrOH in hexanes, 1.0 mL/min flow-rate; retention times: 13.7 min (major), 16.9 min (minor) for (*R*)-**L**\*.

$^1\text{H}$  NMR (500 MHz,  $\text{CDCl}_3$ )  $\delta$  7.61 – 7.56 (m, 1H), 7.49 – 7.41 (m, 2H), 7.41 – 7.35 (m, 2H), 7.35 – 7.31 (m, 2H), 7.26 – 7.18 (m, 1H), 7.16 – 7.08 (m, 1H), 6.96 (q,  $J = 1.2$  Hz, 1H), 5.17 (t,  $J = 8.2$  Hz, 1H), 4.12 – 3.92 (m, 1H), 3.90 – 3.76 (m, 1H), 2.51 – 2.42 (m, 2H), 2.37 (d,  $J = 1.1$  Hz, 3H), 2.30 – 2.11 (m, 2H).

$^{13}\text{C}$  NMR (101 MHz,  $\text{CDCl}_3$ )  $\delta$  167.3, 142.6, 136.5, 129.13, 129.09, 126.9, 125.9, 124.0, 121.6, 119.2, 118.9, 111.3, 109.2, 56.7, 51.5, 28.8, 21.9, 9.7.

FT-IR (thin film): 3049, 2916, 2861, 1660, 1594, 1493, 1462, 1422, 1351, 1327, 1224, 1190, 759, 737, 694  $\text{cm}^{-1}$ .

$[\alpha]^{25}_{\text{D}} = -3.2^\circ$  ( $c = 1.0$ ,  $\text{CHCl}_3$ ); 80% ee from (*R*)-**L**\*.

HR-MS:  $m/z$  305.1649 ( $[\text{M}+\text{H}]^+$ ,  $\text{C}_{20}\text{H}_{21}\text{N}_2\text{O}^+$  calcd. 305.1654).

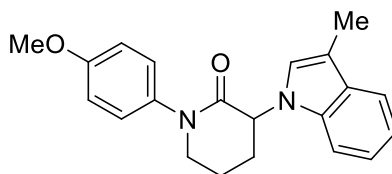

**1-(4-Methoxyphenyl)-3-(3-methyl-1H-indol-1-yl)piperidin-2-one (Table 2, entry 7).** The title compound was prepared according to the General Procedure from 1-(4-methoxyphenyl)-3-iodopiperidin-2-one (124 mg, 0.375 mmol) and 3-methyl-1H-indole (32.8 mg, 0.250 mmol), using 10 mol% of mesitylcopper, 20 mol% of (*R*)-L\*, and 2.2 equiv of Cs<sub>2</sub>CO<sub>3</sub> (179 mg, 0.550 mmol). The reaction was run for 72 h at 23-25 °C. After purification by flash chromatography (0→10% MeOH in CH<sub>2</sub>Cl<sub>2</sub>) and reverse phase chromatography (0→50% MeOH in H<sub>2</sub>O), the title compound was isolated as a white solid in 78% yield (66 mg) and 89% ee.

The second run was performed with (*S*)-L\*. The product was isolated as a white solid in 69% yield (58 mg) and 87% ee.

HPLC analysis of the product: Diacel CHIRALPAK® IA column; 50% *i*-PrOH in hexanes, 1.0 mL/min flow-rate; retention times: 10.6 min (major), 15.7 min (minor) for (*R*)-L\*.

<sup>1</sup>H NMR (400 MHz, CDCl<sub>3</sub>) δ 7.60 (dt, *J* = 7.8, 1.0 Hz, 1H), 7.40 – 7.20 (m, 4H), 7.14 (d, *J* = 1.0 Hz, 1H), 7.04 – 6.88 (m, 3H), 5.12 (t, *J* = 8.1 Hz, 1H), 3.94 – 3.84 (m, 1H), 3.81 (s, 3H), 3.81 – 3.71 (m, 1H), 2.47 – 2.38 (m, 2H), 2.36 (d, *J* = 1.1 Hz, 3H), 2.23 – 2.10 (m, 2H).

<sup>13</sup>C NMR (101 MHz, CDCl<sub>3</sub>) δ 167.4, 158.2, 136.5, 135.6, 129.1, 127.1, 124.1, 121.6, 119.2, 118.9, 114.4, 111.1, 109.3, 56.7, 55.5, 51.9, 28.8, 21.9, 9.8.

FT-IR (thin film): 3046, 2933, 2835, 1660, 1607, 1510, 1462, 1326, 1296, 1240, 1189, 1032, 829, 738 cm<sup>-1</sup>.

[α]<sub>D</sub><sup>25</sup> = -1.8° (c = 1.0, CHCl<sub>3</sub>); 89% ee from (*R*)-L\*.

HR-MS: *m/z* 335.1755 ([M+H]<sup>+</sup>, C<sub>21</sub>H<sub>23</sub>N<sub>2</sub>O<sub>2</sub><sup>+</sup> calcd. 335.1760).

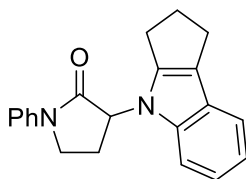

**3-(2,3-Dihydrocyclopenta[b]indol-4(1H)-yl)-1-phenylpyrrolidin-2-one (Table 3, entry 1).**

The title compound was prepared according to the General Procedure from 3-iodo-1-phenylpyrrolidin-2-one (108 mg, 0.375 mmol) and 1,2,3,4-tetrahydrocyclopenta[b]indole (39.3 mg, 0.250 mmol), using 10 mol% of mesitylcopper, 20 mol% of (*R*)-L\*, and 1.8 equiv of Cs<sub>2</sub>CO<sub>3</sub> (147 mg, 0.450 mmol). The reaction was run for 72 h at 23-25 °C. After purification by flash chromatography (25→55% Et<sub>2</sub>O in hexanes) and reverse phase chromatography (0→75% MeOH in H<sub>2</sub>O), the title compound was isolated as a white solid in 67% yield (53 mg) and 97% ee.

The second run was performed with (*S*)-L\*. The product was isolated as a white solid in 64% yield (51 mg) and 96% ee.

HPLC analysis of the product: Diacel CHIRALPAK® IB column; 20% *i*-PrOH in hexanes, 1.0 mL/min flow-rate; retention times: 22.4 min (minor), 40.6 min (major) for (*R*)-L\*.

<sup>1</sup>H NMR (400 MHz, CDCl<sub>3</sub>) δ 7.79 – 7.66 (m, 2H), 7.64 – 7.39 (m, 3H), 7.36 – 7.19 (m, 2H), 7.19 – 7.06 (m, 2H), 5.26 (dd, *J* = 10.4, 8.9 Hz, 1H), 3.98 – 3.89 (m, 2H), 3.05 – 2.78 (m, 4H), 2.76 – 2.65 (m, 1H), 2.63 – 2.50 (m, 2H), 2.39 (m, 1H).

<sup>13</sup>C NMR (101 MHz, CDCl<sub>3</sub>) δ 169.8, 144.9, 141.0, 139.2, 129.1, 125.2, 125.1, 120.4, 120.1, 119.8, 119.5, 119.0, 109.5, 57.1, 44.9, 28.6, 26.1, 26.0, 24.4.

FT-IR (thin film): 3045, 2951, 2850, 1706, 1597, 1495, 1456, 1402, 1375, 1307, 738, 690 cm<sup>-1</sup>.

[α]<sub>D</sub><sup>25</sup> = –86° (*c* = 1.0, CHCl<sub>3</sub>); 97% ee from (*R*)-L\*.

HR-MS: *m/z* 317.1648 ([M+H]<sup>+</sup>, C<sub>21</sub>H<sub>21</sub>N<sub>2</sub>O<sup>+</sup> calcd. 317.1654).

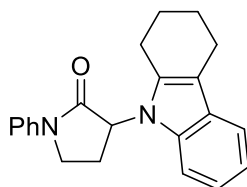

**3-(3,4-Dihydro-1H-carbazol-9(2H)-yl)-1-phenylpyrrolidin-2-one (Table 3, entry 2).** The title compound was prepared according to the General Procedure from 3-iodo-1-phenylpyrrolidin-2-one (108 mg, 0.375 mmol) and 2,3,4,9-tetrahydro-1H-carbazole (42.8 mg, 0.250 mmol), using 10 mol% of mesitylcopper, 20 mol% of (*R*)-L\*, and 1.8 equiv of Cs<sub>2</sub>CO<sub>3</sub> (147 mg, 0.450 mmol). The reaction was run for 72 h at 23–25 °C. After purification by flash chromatography (0→5% MeOH in CH<sub>2</sub>Cl<sub>2</sub>) and reverse phase chromatography (0→100% MeOH in H<sub>2</sub>O), the title compound was isolated as a white solid in 72% yield (59 mg) and 98% ee.

The second run was performed with (*S*)-L\*. The product was isolated as a white solid in 66% yield (55 mg) and 97% ee.

HPLC analysis of the product: Diacel CHIRALPAK® IC column; 35% *i*-PrOH in hexanes, 1.0 mL/min flow-rate; retention times: 14.5 min (minor), 27.9 min (major) for (*R*)-L\*.

<sup>1</sup>H NMR (400 MHz, CDCl<sub>3</sub>) δ 7.83 – 7.72 (m, 2H), 7.55 – 7.40 (m, 3H), 7.28 – 7.21 (m, 1H), 7.21 – 7.07 (m, 3H), 5.25 (s, 1H), 4.22 – 3.84 (m, 2H), 3.07 – 2.70 (m, 4H), 2.71 – 2.42 (m, 2H), 2.17 – 1.73 (m, 4H).

<sup>13</sup>C NMR (101 MHz, CDCl<sub>3</sub>) δ 169.9, 139.2, 129.1, 125.2, 121.0, 119.8, 119.2, 118.3, 56.0, 44.8, 23.3, 23.0, 21.1.

FT-IR (thin film): 3046, 2929, 2838, 1705, 1597, 1495, 1464, 1401, 1375, 1309, 1226, 758, 738, 692 cm<sup>-1</sup>.

[α]<sub>D</sub><sup>25</sup> = –94° (*c* = 1.0, CHCl<sub>3</sub>); 98% ee from (*R*)-L\*.

HR-MS: *m/z* 331.1806 ([M+H]<sup>+</sup>, C<sub>22</sub>H<sub>23</sub>N<sub>2</sub>O<sup>+</sup> calcd. 331.1810).

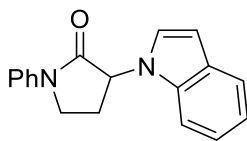

**3-(1*H*-Indol-1-yl)-1-phenylpyrrolidin-2-one (Table 3, entry 3).** The title compound was prepared according to the General Procedure from 3-iodo-1-phenylpyrrolidin-2-one (108 mg, 0.375 mmol) and indole (29.3 mg, 0.250 mmol), using 10 mol% of mesitylcopper, 20 mol% of (*R*)-**L**<sup>\*</sup>, and 1.8 equiv of Cs<sub>2</sub>CO<sub>3</sub> (147 mg, 0.450 mmol). The reaction was run for 72 h at 25-26 °C. After purification by flash chromatography (35→60% Et<sub>2</sub>O in hexanes), the title compound was isolated as a white solid in 54% yield (37 mg) and 83% ee.

The second run was performed with (*S*)-**L**<sup>\*</sup>. The product was isolated as a white solid in 49% yield (34 mg) and 83% ee.

HPLC analysis of the product: Diacel CHIRALPAK<sup>®</sup> IC column; 35% *i*-PrOH in hexanes, 1.0 mL/min flow-rate; retention times: 28.4 min (minor), 35.1 min (major) for (*R*)-**L**<sup>\*</sup>.

<sup>1</sup>H NMR (400 MHz, CDCl<sub>3</sub>) δ 7.82 – 7.73 (m, 2H), 7.73 – 7.65 (m, 1H), 7.55 – 7.40 (m, 2H), 7.37 – 7.33 (m, 1H), 7.29 – 7.21 (m, 2H), 7.21 – 7.12 (m, 2H), 6.63 (d, *J* = 3.2 Hz, 1H), 5.33 (dd, *J* = 10.1, 8.7 Hz, 1H), 4.19 – 3.85 (m, 2H), 2.98 – 2.63 (m, 1H), 2.45 (dq, *J* = 12.9, 8.7 Hz, 1H).

<sup>13</sup>C NMR (101 MHz, CDCl<sub>3</sub>) δ 169.5, 139.0, 136.0, 129.1, 129.0, 126.1, 125.3, 121.9, 121.3, 119.9, 119.8, 109.4, 102.9, 58.2, 45.0, 26.4.

FT-IR (thin film): 3048, 2952, 1701, 1597, 1496, 1480, 1460, 1396, 1310, 1226, 1199, 759, 741, 690 cm<sup>-1</sup>.

[α]<sup>25</sup><sub>D</sub> = –55° (*c* = 1.0, CHCl<sub>3</sub>); 83% ee from (*R*)-**L**<sup>\*</sup>.

HR-MS: *m/z* 277.1339 ([*M*+*H*]<sup>+</sup>, C<sub>18</sub>H<sub>17</sub>N<sub>2</sub>O<sup>+</sup> calcd. 277.1341).

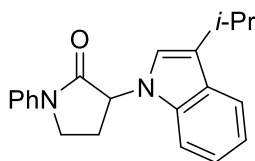

**3-(3-Isopropyl-1*H*-indol-1-yl)-1-phenylpyrrolidin-2-one (Table 3, entry 4).** The title compound was prepared according to the General Procedure from 3-iodo-1-phenylpyrrolidin-2-one (108 mg, 0.375 mmol) and 3-isopropyl-1*H*-indole (39.8 mg, 0.250 mmol), using 10 mol% of mesitylcopper, 20 mol% of (*R*)-**L**<sup>\*</sup>, and 1.8 equiv of Cs<sub>2</sub>CO<sub>3</sub> (147 mg, 0.450 mmol). The reaction was run for 72 h at 23-25 °C. After purification by flash chromatography (35% Et<sub>2</sub>O in hexanes) and reverse phase chromatography (0→75% MeOH in H<sub>2</sub>O), the title compound was isolated as a white solid in 82% yield (65 mg) and 89% ee.

The second run was performed with (*S*)-**L**<sup>\*</sup>. The product was isolated as a white solid in 86% yield (68 mg) and 91% ee.

HPLC analysis of the product: Diacel CHIRALPAK<sup>®</sup> IC column; 35% *i*-PrOH in hexanes, 1.0 mL/min flow-rate; retention times: 9.5 min (minor), 12.3 min (major) for (*R*)-**L**<sup>\*</sup>.

<sup>1</sup>H NMR (400 MHz, CDCl<sub>3</sub>) δ 7.84 – 7.73 (m, 2H), 7.74 – 7.63 (m, 1H), 7.50 – 7.42 (m, 2H), 7.34 – 7.19 (m, 3H), 7.18 – 7.09 (m, 1H), 6.94 (d, *J* = 0.9 Hz, 1H), 5.31 (dd, *J* = 10.3, 8.8 Hz, 1H),



4.40 – 3.59 (m, 2H), 3.24 (septd,  $J = 6.8, 0.9$  Hz, 1H), 2.80 (dddd,  $J = 13.0, 8.8, 5.6, 3.4$  Hz, 1H), 2.44 (ddt,  $J = 13.0, 10.3, 9.2$  Hz, 1H), 1.39 (d,  $J = 6.8, 3\text{H}$ ), 1.37 (d,  $J = 6.8, 3\text{H}$ ).

$^{13}\text{C}$  NMR (101 MHz,  $\text{CDCl}_3$ )  $\delta$  169.7, 139.1, 136.7, 129.1, 128.0, 125.3, 124.2, 121.8, 121.2, 119.9, 119.8, 119.1, 109.3, 58.0, 45.0, 26.3, 25.6, 23.30, 23.26.

FT-IR (thin film): 3046, 2958, 2868, 1706, 1598, 1495, 1462, 1395, 1307, 1226, 1198, 758, 739, 690  $\text{cm}^{-1}$ .

$[\alpha]^{25}_{\text{D}} = -51^\circ$  ( $c = 1.0, \text{CHCl}_3$ ); 89% ee from (*R*)-**L**\*.

HR-MS:  $m/z$  319.1805 ( $[\text{M}+\text{H}]^+$ ,  $\text{C}_{21}\text{H}_{23}\text{N}_2\text{O}^+$  calcd. 319.1810).

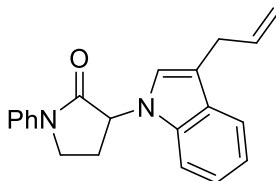

**3-(3-Allyl-1*H*-indol-1-yl)-1-phenylpyrrolidin-2-one (Table 3, entry 5).** The title compound was prepared according to the General Procedure from 3-iodo-1-phenylpyrrolidin-2-one (108 mg, 0.375 mmol) and 3-allyl-1*H*-indole (39.3 mg, 0.250 mmol), using 10 mol% of mesitylcopper, 20 mol% of (*R*)-**L**\*, and 1.8 equiv of  $\text{Cs}_2\text{CO}_3$  (147 mg, 0.450 mmol). The reaction was run for 72 h at 23–24 °C. After purification by flash chromatography (35%  $\text{Et}_2\text{O}$  in hexanes) and reverse phase chromatography (0→75% MeOH in  $\text{H}_2\text{O}$ ), the title compound was isolated as a yellow oil in 89% yield (70 mg) and 87% ee.

The second run was performed with (*S*)-**L**\*. The product was isolated as a yellow oil in 98% yield (78 mg) and 87% ee.

HPLC analysis of the product: Diacel CHIRALPAK® IC column; 35% *i*-PrOH in hexanes, 1.0 mL/min flow-rate; retention times: 14.5 min (minor), 17.0 min (major) for (*R*)-**L**\*.

$^1\text{H}$  NMR (400 MHz,  $\text{CDCl}_3$ )  $\delta$  7.80 – 7.74 (m, 2H), 7.64 (dt,  $J = 7.8, 1.0$  Hz, 1H), 7.49 – 7.42 (m, 2H), 7.32 (dt,  $J = 8.3, 1.0$  Hz, 1H), 7.28 – 7.20 (m, 2H), 7.15 (ddd,  $J = 8.0, 7.0, 1.1$  Hz, 1H), 6.99 (s, 1H), 6.10 (ddt,  $J = 16.6, 10.0, 6.5$  Hz, 1H), 5.32 (dd,  $J = 10.2, 8.7$  Hz, 1H), 5.20 (dq,  $J = 17.0, 1.7$  Hz, 1H), 5.14 – 5.06 (m, 1H), 4.02 (dd,  $J = 9.2, 4.6$  Hz, 2H), 3.55 (dq,  $J = 6.5, 1.4$  Hz, 2H), 2.81 (ddt,  $J = 13.2, 8.9, 4.5$  Hz, 1H), 2.44 (ddt,  $J = 13.0, 10.3, 9.2$  Hz, 1H).

$^{13}\text{C}$  NMR (101 MHz,  $\text{CDCl}_3$ )  $\delta$  169.8, 139.1, 137.2, 136.6, 129.1, 128.5, 125.3, 123.6, 122.0, 119.8, 119.6, 119.4, 115.4, 114.8, 109.4, 58.0, 44.9, 30.0, 26.3.

FT-IR (thin film): 3057, 2923, 1704, 1638, 1598, 1500, 1462, 1395, 1308, 1225, 1177, 1113, 995, 912, 758, 740  $\text{cm}^{-1}$ .

$[\alpha]^{25}_{\text{D}} = -53^\circ$  ( $c = 1.0, \text{CHCl}_3$ ); 87% ee from (*R*)-**L**\*.

HR-MS:  $m/z$  317.1647 ( $[\text{M}+\text{H}]^+$ ,  $\text{C}_{21}\text{H}_{21}\text{N}_2\text{O}^+$  calcd. 317.1654).

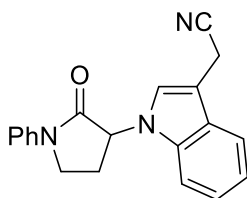

**2-(1-(2-Oxo-1-phenylpyrrolidin-3-yl)-1H-indol-3-yl)acetonitrile (Table 3, entry 6).** The title compound was prepared according to the General Procedure from 3-iodo-1-phenylpyrrolidin-2-one (108 mg, 0.375 mmol) and 2-(1H-indol-3-yl)acetonitrile (39.0 mg, 0.250 mmol), using 10 mol% of mesitylcopper, 20 mol% of (*R*)-L\*, and 1.0 equiv of Cs<sub>2</sub>CO<sub>3</sub> (81.5 mg, 0.250 mmol). The reaction was run for 48 h at 23-25 °C. After purification by flash chromatography (50→100% Et<sub>2</sub>O in hexanes), the title compound was isolated as a yellow oil in 55% yield (43 mg) and 86% ee.

The second run was performed with (*S*)-L\*. The product was isolated as a yellow oil in 52% yield (41 mg) and 88% ee.

HPLC analysis of the product: Diacel CHIRALPAK® IC column; 50% *i*-PrOH in hexanes, 1.0 mL/min flow-rate; retention times: 15.4 min (minor), 48.1 min (major) for (*R*)-L\*.

<sup>1</sup>H NMR (400 MHz, CDCl<sub>3</sub>) δ 7.79 – 7.70 (m, 2H), 7.65 – 7.59 (m, 1H), 7.51 – 7.42 (m, 2H), 7.39 – 7.20 (m, 5H), 5.33 (dd, *J* = 10.4, 8.7 Hz, 1H), 4.11 – 3.94 (m, 2H), 3.86 (d, *J* = 1.1 Hz, 2H), 2.95 – 2.72 (m, 1H), 2.59 – 2.30 (m, 1H).

<sup>13</sup>C NMR (101 MHz, CDCl<sub>3</sub>) δ 169.1, 138.8, 136.5, 129.1, 127.0, 125.5, 124.6, 122.9, 120.5, 119.9, 118.7, 118.1, 109.8, 105.0, 58.1, 45.0, 26.5, 14.5.

FT-IR (thin film): 3050, 2922, 2248, 1700, 1597, 1495, 1464, 1398, 1307, 1226, 1205, 1178, 742, 692 cm<sup>-1</sup>.

[α]<sub>D</sub><sup>25</sup> = -44° (*c* = 1.0, CHCl<sub>3</sub>); 86% ee from (*R*)-L\*.

HR-MS: *m/z* 316.1443 ([M+H]<sup>+</sup>, C<sub>20</sub>H<sub>18</sub>N<sub>3</sub>O<sup>+</sup> calcd. 316.1450).

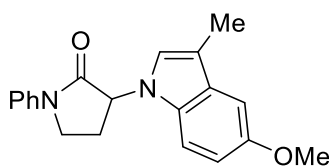

**3-(5-Methoxy-3-methyl-1H-indol-1-yl)-1-phenylpyrrolidin-2-one (Table 3, entry 7).** The title compound was prepared according to the General Procedure from 3-iodo-1-phenylpyrrolidin-2-one (108 mg, 0.375 mmol) and 5-methoxy-3-methyl-1H-indole (40.0 mg, 0.250 mmol), using 10 mol% of mesitylcopper, 20 mol% of (*R*)-L\*, and 2.2 equiv of Cs<sub>2</sub>CO<sub>3</sub> (180 mg, 0.550 mmol). The reaction was run for 72 h at 24-25 °C. After purification by flash chromatography (25→85% Et<sub>2</sub>O in hexanes), the title compound was isolated as a white solid in 86% yield (69 mg) and 91% ee.

The second run was performed with (*S*)-L\*. The product was isolated as a white solid in 83% yield (66 mg) and 90% ee.

HPLC analysis of the product: Diacel CHIRALPAK® IA column; 50% *i*-PrOH in hexanes, 1.0 mL/min flow-rate; retention times: 10.0 min (minor), 31.0 min (major) for (*R*)-L\*.

$^1\text{H}$  NMR (400 MHz,  $\text{CDCl}_3$ )  $\delta$  7.89 – 7.68 (m, 2H), 7.59 – 7.37 (m, 2H), 7.28 – 7.21 (m, 1H), 7.19 (d,  $J$  = 8.8 Hz, 1H), 7.05 (d,  $J$  = 2.4 Hz, 1H), 6.95 (d,  $J$  = 1.2 Hz, 1H), 6.90 (dd,  $J$  = 8.8, 2.5 Hz, 1H), 5.22 (dd,  $J$  = 10.2, 8.7 Hz, 1H), 4.04 – 3.94 (m, 2H), 3.90 (s, 3H), 2.89 – 2.64 (m, 1H), 2.52 – 2.33 (m, 1H), 2.33 (d,  $J$  = 1.1 Hz, 3H).

$^{13}\text{C}$  NMR (101 MHz,  $\text{CDCl}_3$ )  $\delta$  169.8, 154.0, 139.1, 131.6, 129.7, 129.1, 125.2, 124.2, 119.8, 112.0, 111.6, 109.9, 101.3, 58.1, 56.0, 45.0, 26.4, 9.8.

FT-IR (thin film): 2933, 1704, 1597, 1487, 1457, 1395, 1309, 1244, 1221, 1100, 1047, 759  $\text{cm}^{-1}$ .

$[\alpha]^{25}_{\text{D}} = -75^\circ$  ( $c$  = 1.0,  $\text{CHCl}_3$ ); 91% ee from (*R*)-**L**\*.

HR-MS:  $m/z$  321.1592 ( $[\text{M}+\text{H}]^+$ ,  $\text{C}_{20}\text{H}_{21}\text{N}_2\text{O}_2^+$  calcd. 321.1603).

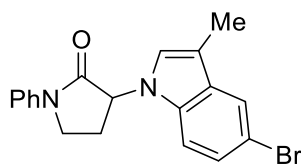

**3-(5-Bromo-3-methyl-1*H*-indol-1-yl)-1-phenylpyrrolidin-2-one (Table 3, entry 8).** The title compound was prepared according to the General Procedure from 3-iodo-1-phenylpyrrolidin-2-one (108 mg, 0.375 mmol) and 5-bromo-3-methyl-1*H*-indole (52.2 mg, 0.250 mmol), using 10 mol% of mesitylcopper, 20 mol% of (*R*)-**L**\*, and 1.8 equiv of  $\text{Cs}_2\text{CO}_3$  (147 mg, 0.450 mmol). The reaction was run for 48 h at 24–25  $^\circ\text{C}$ . After purification by flash chromatography (25 $\rightarrow$ 75%  $\text{Et}_2\text{O}$  in hexanes), the title compound was isolated as a white solid in 74% yield (68 mg) and 87% ee.

The second run was performed with (*S*)-**L**\*. The product was isolated as a white solid in 65% yield (60 mg) and 90% ee.

HPLC analysis of the product: Diacel CHIRALPAK<sup>®</sup> IC column; 35% *i*-PrOH in hexanes, 1.0 mL/min flow-rate; retention times: 15.3 min (minor), 17.1 min (major) for (*R*)-**L**\*.

$^1\text{H}$  NMR (400 MHz,  $\text{CDCl}_3$ )  $\delta$  7.77 – 7.70 (m, 3H), 7.58 – 7.38 (m, 2H), 7.38 – 7.20 (m, 2H), 7.20 – 7.12 (m, 1H), 6.96 (q,  $J$  = 1.2 Hz, 1H), 5.21 (dd,  $J$  = 10.2, 8.7 Hz, 1H), 4.13 – 3.86 (m, 2H), 2.89 – 2.67 (m, 1H), 2.55 – 2.33 (m, 1H), 2.31 (d,  $J$  = 1.2 Hz, 3H).

$^{13}\text{C}$  NMR (101 MHz,  $\text{CDCl}_3$ )  $\delta$  169.4, 138.9, 135.1, 131.0, 129.1, 125.4, 124.7, 124.6, 122.0, 119.8, 112.6, 111.8, 110.7, 58.0, 44.9, 26.3, 9.6.

FT-IR (thin film): 2917, 1700, 1598, 1494, 1458, 1394, 1307, 1225, 1199, 786, 758, 691  $\text{cm}^{-1}$ .

$[\alpha]^{25}_{\text{D}} = -23^\circ$  ( $c$  = 1.0,  $\text{CHCl}_3$ ); 87% ee from (*R*)-**L**\*.

HR-MS:  $m/z$  369.0593 ( $[\text{M}+\text{H}]^+$ ,  $\text{C}_{19}\text{H}_{18}\text{BrN}_2\text{O}^+$  calcd. 369.0603).

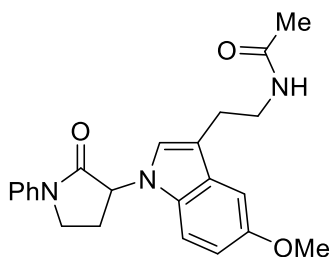

**N-(2-(5-Methoxy-1-(2-oxo-1-phenylpyrrolidin-3-yl)-1H-indol-3-yl)ethyl)acetamide (Table 3, entry 9).** The title compound was prepared according to the General Procedure from 3-iodo-1-phenylpyrrolidin-2-one (108 mg, 0.375 mmol) and *N*-acetyl-5-methoxytryptamine (58.1 mg, 0.250 mmol), using 10 mol% of mesitylcopper, 20 mol% of (*R*)-**L**<sup>\*</sup>, and 2.2 equiv of Cs<sub>2</sub>CO<sub>3</sub> (179 mg, 0.550 mmol). The reaction was run for 72 h at 25–26 °C. After purification by flash chromatography (0→15% MeOH in CH<sub>2</sub>Cl<sub>2</sub>) and reverse phase chromatography (0→70% MeOH in H<sub>2</sub>O), the title compound was isolated as a white solid in 57% yield (56 mg) and 86% ee.

The second run was performed with (*S*)-**L**<sup>\*</sup>. The product was isolated as a white solid in 54% yield (53 mg) and 83% ee.

SFC analysis of the product: Diacel CHIRALPAK<sup>®</sup> IC column; 50% MeOH in CO<sub>2</sub>, 3.0 mL/min flow-rate; retention times: 5.1 min (minor), 5.9 min (major) for (*R*)-**L**<sup>\*</sup>.

<sup>1</sup>H NMR (400 MHz, CDCl<sub>3</sub>) δ 7.84 – 7.68 (m, 2H), 7.54 – 7.41 (m, 2H), 7.28 – 7.18 (m, 2H), 7.10 – 7.06 (d, *J* = 2.4 Hz, 1H), 7.00 (s, 1H), 6.91 (dd, *J* = 8.9, 2.5 Hz, 1H), 5.66 (br s, 1H), 5.24 (dd, *J* = 10.2, 8.7 Hz, 1H), 4.11 – 3.93 (m, 2H), 3.88 (s, 3H), 3.76 – 3.46 (m, 2H), 3.11 – 2.87 (m, 2H), 2.88 – 2.76 (m, 1H), 2.52 – 2.37 (m, 1H), 1.95 (s, 3H).

<sup>13</sup>C NMR (101 MHz, CDCl<sub>3</sub>) δ 170.1, 169.6, 154.3, 138.9, 131.7, 129.1, 128.9, 125.4, 124.7, 119.8, 112.9, 112.4, 110.3, 101.1, 58.3, 56.0, 45.0, 39.7, 26.4, 25.3, 23.4.

FT-IR (thin film): 3305, 3065, 2934, 1703, 1651, 1597, 1548, 1485, 1452, 1396, 1307, 1223, 1176, 1030, 760, 692 cm<sup>-1</sup>.

[α]<sup>25</sup><sub>D</sub> = –29° (*c* = 1.0, CHCl<sub>3</sub>); 86% ee from (*R*)-**L**<sup>\*</sup>.

HR-MS: *m/z* 392.1973 ([*M*+*H*]<sup>+</sup>, C<sub>23</sub>H<sub>26</sub>N<sub>3</sub>O<sub>3</sub><sup>+</sup> calcd. 392.1974).

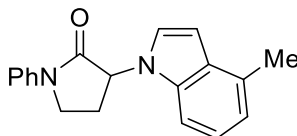

**3-(4-Methyl-1H-indol-1-yl)-1-phenylpyrrolidin-2-one (Table 3, entry 10).** The title compound was prepared according to the General Procedure from 3-iodo-1-phenylpyrrolidin-2-one (108 mg, 0.375 mmol) and 4-methyl-1H-indole (32.8 mg, 0.250 mmol), using 10 mol% of mesitylcopper, 20 mol% of (*R*)-**L**<sup>\*</sup>, and 1.8 equiv of Cs<sub>2</sub>CO<sub>3</sub> (147 mg, 0.450 mmol). The reaction was run for 48 h at 23–25 °C. After purification by flash chromatography (0→60% Et<sub>2</sub>O in hexanes), the title compound was isolated as a white solid in 59% yield (43 mg) and 91% ee.

The second run was performed with (*S*)-**L**<sup>\*</sup>. The product was isolated as a white solid in 58% yield (42 mg) and 91% ee.

HPLC analysis of the product: Diacel CHIRALPAK® IB column; 20% *i*-PrOH in hexanes, 1.0 mL/min flow-rate; retention times: 4.5 min (minor), 5.1 min (major) for (*R*)-**L**\*.

<sup>1</sup>H NMR (400 MHz, CDCl<sub>3</sub>) δ 7.81 – 7.74 (m, 2H), 7.49 – 7.42 (m, 2H), 7.27 – 7.11 (m, 4H), 6.99 – 6.93 (m, 1H), 6.64 (dd, *J* = 3.3, 0.8 Hz, 1H), 5.34 (dd, *J* = 10.1, 8.7 Hz, 1H), 4.09 – 3.98 (m, 2H), 2.88 – 2.79 (m, 1H), 2.59 (s, 3H), 2.53 – 2.41 (m, 1H).

<sup>13</sup>C NMR (101 MHz, CDCl<sub>3</sub>) δ 169.5, 139.0, 135.7, 130.8, 129.1, 128.8, 125.4, 125.3, 122.1, 120.2, 119.8, 107.0, 101.4, 58.3, 45.0, 26.5, 18.7.

FT-IR (thin film): 3045, 2917, 1703, 1598, 1492, 1458, 1397, 1307, 1226, 749, 690 cm<sup>-1</sup>.

[α]<sub>D</sub><sup>25</sup> = -3.2° (*c* = 1.0, CHCl<sub>3</sub>); 91% ee from (*R*)-**L**\*.

HR-MS: *m/z* 291.1487 ([M+H]<sup>+</sup>, C<sub>19</sub>H<sub>19</sub>N<sub>2</sub>O<sup>+</sup> calcd. 291.1497).

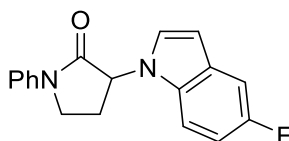

**3-(5-Fluoro-1*H*-indol-1-yl)-1-phenylpyrrolidin-2-one (Table 3, entry 11).** The title compound was prepared according to the General Procedure from 3-iodo-1-phenylpyrrolidin-2-one (108 mg, 0.375 mmol) and 5-fluoro-1*H*-indole (33.8 mg, 0.250 mmol), using 10 mol% of mesitylcopper, 20 mol% of (*R*)-**L**\*, and 1.8 equiv of Cs<sub>2</sub>CO<sub>3</sub> (147 mg, 0.450 mmol). The reaction was run for 72 h at 25-26 °C. After purification by flash chromatography (30→65% Et<sub>2</sub>O in hexanes), the title compound was isolated as a white solid in 52% yield (38 mg) and 83% ee.

The second run was performed with (*S*)-**L**\*. The product was isolated as a white solid in 54% yield (35 mg) and 84% ee.

HPLC analysis of the product: Diacel CHIRALPAK® IC column; 35% *i*-PrOH in hexanes, 1.0 mL/min flow-rate; retention times: 14.6 min (minor), 18.6 min (major) for (*R*)-**L**\*.

<sup>1</sup>H NMR (400 MHz, CDCl<sub>3</sub>) δ 7.92 – 7.67 (m, 2H), 7.59 – 7.40 (m, 2H), 7.38 – 7.11 (m, 4H), 7.07 – 6.90 (m, 1H), 6.57 (d, *J* = 3.3, 1H), 5.29 (dd, *J* = 10.2, 8.7 Hz, 1H), 4.20 – 3.83 (m, 2H), 2.92 – 2.70 (m, 1H), 2.56 – 2.35 (m, 1H).

<sup>13</sup>C NMR (101 MHz, CDCl<sub>3</sub>) δ 169.2, 158.1 (d, *J* = 234.8 Hz), 138.9, 132.6, 129.4 (d, *J* = 10.2 Hz), 129.1, 127.7, 125.4, 119.8, 110.3 (d, *J* = 26.4 Hz), 110.0 (d, *J* = 9.7 Hz), 106.1 (d, *J* = 23.3 Hz), 102.9 (d, *J* = 4.7 Hz), 58.4, 45.0, 26.4.

FT-IR (thin film): 3065, 2923, 1704, 1597, 1495, 1482, 1449, 1399, 1309, 1222, 1117, 949, 758, 690 cm<sup>-1</sup>.

[α]<sub>D</sub><sup>25</sup> = -34° (*c* = 1.0, CHCl<sub>3</sub>); 83% ee from (*R*)-**L**\*.

HR-MS: *m/z* 295.1241 ([M+H]<sup>+</sup>, C<sub>18</sub>H<sub>16</sub>FN<sub>2</sub>O<sup>+</sup> calcd. 295.1247).

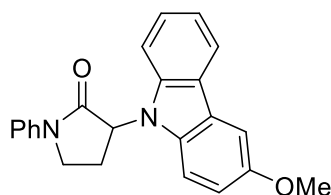

**3-(3-Methoxy-9H-carbazol-9-yl)-1-phenylpyrrolidin-2-one (Table 3, entry 12).** The title compound was prepared according to the General Procedure from 3-iodo-1-phenylpyrrolidin-2-one (108 mg, 0.375 mmol) and 3-methoxy-9H-carbazole (49.3 mg, 0.250 mmol), using 10 mol% of mesitylcopper, 20 mol% of (*R*)-L\*, and 1.8 equiv of Cs<sub>2</sub>CO<sub>3</sub> (147 mg, 0.450 mmol). The reaction was run for 60 h at 23-25 °C. After purification by flash chromatography (25→80% Et<sub>2</sub>O in hexanes), the title compound was obtained as a white solid in 79% yield (70 mg) and 96% ee.

The second run was performed with (*S*)-L\*. The product was isolated as a white solid in 84% yield (75 mg) and 97% ee.

HPLC analysis of the product: Diacel CHIRALPAK® IA column; 50% *i*-PrOH in hexanes, 1.0 mL/min flow-rate; retention times: 13.6 min (minor), 41.6 min (major) for (*R*)-L\*.

<sup>1</sup>H NMR (400 MHz, CDCl<sub>3</sub>) δ 8.13 – 8.06 (m, 1H), 7.87 – 7.76 (m, 2H), 7.63 (d, *J* = 2.5 Hz, 1H), 7.57 – 7.39 (m, 3H), 7.37 – 7.18 (m, 4H), 7.08 (dd, *J* = 8.9, 2.5 Hz, 1H), 5.54 (dd, *J* = 10.8, 9.3 Hz, 1H), 4.32 – 3.97 (m, 2H), 3.95 (s, 3H), 2.74 – 2.52 (m, 2H).

<sup>13</sup>C NMR (101 MHz, CDCl<sub>3</sub>) δ 169.4, 154.1, 139.2, 129.1, 125.8, 125.3, 124.2, 123.6, 120.5, 119.7, 119.2, 114.8, 110.0, 109.3, 103.7, 56.23, 56.15, 44.9, 23.3.

FT-IR (thin film): 3049, 2952, 2831, 1704, 1597, 1490, 1462, 1405, 1306, 1201, 1081, 1032, 744, 689 cm<sup>-1</sup>.

[α]<sup>25</sup><sub>D</sub> = -89° (c = 1.0, CHCl<sub>3</sub>); 96% ee from (*R*)-L\*.

HR-MS: *m/z* 357.1593 ([M+H]<sup>+</sup>, C<sub>23</sub>H<sub>21</sub>N<sub>2</sub>O<sub>2</sub><sup>+</sup> calcd. 357.1603).

**Gram-scale reaction.** The title compound was prepared as above from 3-iodo-1-phenylpyrrolidin-2-one (1.51 g, 5.25 mmol) and 3-methoxy-9H-carbazole (690 mg, 3.50 mmol), using 10 mol% of mesitylcopper, 20 mol% of (*S*)-L\*, and 2.5 equiv of Cs<sub>2</sub>CO<sub>3</sub> (2.85 g, 8.75 mmol). The reaction was run for 90 h at 23-25 °C. The product was isolated as a white solid in 85% yield (1.06 g) and 92% ee.

If desired, L\* can be recovered:

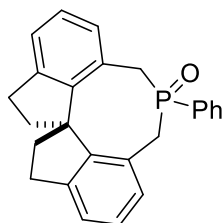

**Recovery of (*S*)-L\* oxide.** Upon column chromatography of the gram-scale reaction, the fractions that contained L\* and L\* oxide (but not any unreacted electrophile) were collected and concentrated. The residue was dissolved in MeOH (~10 mL) and cooled to 0 °C. Next, H<sub>2</sub>O<sub>2</sub> (30% w/w in H<sub>2</sub>O; 200 μL) was added. The reaction mixture was warmed to room temperature, stirred for 1 h, and then concentrated. The residue was purified by flash

chromatography (0→15% MeOH in Et<sub>2</sub>O), which afforded (*S*)-L\* oxide as a yellow solid in 94% recovery (243 mg).

<sup>1</sup>H {<sup>31</sup>P} NMR (400 MHz, CDCl<sub>3</sub>) δ 7.60 – 7.46 (m, 1H), 7.35 (t, *J* = 7.7 Hz, 2H), 7.31 – 7.26 (m, 2H), 7.26 – 7.14 (m, 4H), 6.92 (t, *J* = 7.5 Hz, 1H), 6.24 (d, *J* = 7.5 Hz, 1H), 3.81 (d, *J* = 13.8 Hz, 1H), 3.65 (d, *J* = 13.9 Hz, 1H), 3.08 (ddd, *J* = 17.7, 11.5, 6.7 Hz, 2H), 2.94 (ddd, *J* = 15.9, 10.8, 8.2 Hz, 2H), 2.81 (ddd, *J* = 28.2, 13.8, 1.7 Hz, 2H), 2.33 (dd, *J* = 12.4, 6.6 Hz, 1H), 2.25 (dd, *J* = 12.4, 6.6 Hz, 1H), 2.00 (dtdd, *J* = 36.4, 11.9, 7.3, 3.1 Hz, 2H).

<sup>31</sup>P {<sup>1</sup>H} NMR (162 MHz, CDCl<sub>3</sub>) δ 35.6.

FT-IR (thin film): 3054, 2945, 2850, 1703, 1591, 1468, 1452, 1435, 1405, 1306, 1257, 1223, 1213, 1177, 1106, 1061, 848, 822, 804, 752 cm<sup>-1</sup>.

[α]<sub>D</sub><sup>25</sup> = -39.8° (c = 1.0, CHCl<sub>3</sub>).

HR-MS: *m/z* 371.1567 ([M+H]<sup>+</sup>, C<sub>25</sub>H<sub>24</sub>PO<sup>+</sup> calcd. 371.1565).

**Regeneration of (*S*)-L\*.**<sup>3</sup> In a nitrogen-filled glovebox, (*S*)-L\* oxide was dissolved in toluene (0.03 M) in a sealed flask, and then triethylamine (7.0 equiv) was added. Next, trichlorosilane (5.0 equiv) was added to the reaction mixture dropwise over 15 min. The flask was removed from the glovebox, and the reaction mixture was stirred under nitrogen at 110 °C for 16 h. Next, the flask was taken into the glovebox, and it was capped with a septum and a needle vent. Then, the reaction was quenched by the dropwise addition over 30 min of a degassed aqueous solution of KOH (5.0 M; 10 mL). The reaction mixture was stirred for 20 min, and the organic layer was removed by pipette. The aqueous phase was extracted with benzene, and the combined organic layers were concentrated. The residue was dissolved in benzene, and the resulting solution was filtered through a pipette that contained a plug of silica gel, using benzene as the eluant. The filtrate was concentrated and isolated as a white solid (211 mg). <sup>1</sup>H NMR data matched previously reported data.<sup>4</sup>

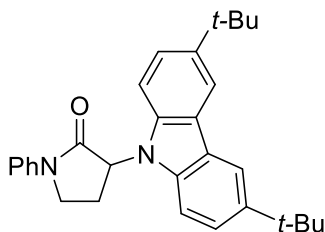

**3-(3,6-Di-tert-butyl-9H-carbazol-9-yl)-1-phenylpyrrolidin-2-one (Table 3, entry 13).** The title compound was prepared according to the General Procedure from 3-iodo-1-

- 
- (3) This procedure is adapted from: Wu, H.-C.; Yu, J.-Q.; Spencer, J. B. Stereospecific Deoxygenation of Phosphine Oxides with Retention of Configuration Using Triphenylphosphine or Triethyl Phosphite as an Oxygen Acceptor. *Org. Lett.* **2004**, *6*, 4675–4678.
- (4) Zhu, S.-F.; Yang, Y.; Wang, L.-X.; Liu, B.; Zhou, Q.-L. Synthesis and Application of Chiral Spiro Phospholane Ligand in Pd-Catalyzed Asymmetric Allylation of Aldehydes with Allylic Alcohols. *Org. Lett.* **2005**, *7*, 2333–2335.

phenylpyrrolidin-2-one (108 mg, 0.375 mmol) and 3,6-di-tert-butyl-9H-carbazole (69.9 mg, 0.250 mmol), using 10 mol% of mesitylcopper, 20 mol% of (*R*)-L\*, and 1.8 equiv of Cs<sub>2</sub>CO<sub>3</sub> (147 mg, 0.450 mmol). The reaction was run for 72 h at 23-25 °C. After purification by flash chromatography (0→50% Et<sub>2</sub>O in hexanes) and reverse phase chromatography (0→80% MeOH in H<sub>2</sub>O), the title compound was isolated as a white solid in 79% yield (87 mg) and 94% ee.

The second run was performed with (*S*)-L\*. The product was isolated as a white solid in 81% yield (89 mg) and 95% ee.

HPLC analysis of the product: Diacel CHIRALPAK® IC column; 15% *i*-PrOH in hexanes, 1.0 mL/min flow-rate; retention times: 15.4 min (minor), 48.1 min (major) for (*R*)-L\*.

<sup>1</sup>H NMR (400 MHz, CDCl<sub>3</sub>) δ 8.15 (d, *J* = 0.6 Hz, 2H), 7.87 – 7.79 (m, 2H), 7.56 – 7.42 (m, 4H), 7.33 – 7.17 (m, 3H), 5.58 (dd, *J* = 10.5, 9.6 Hz, 1H), 4.12 – 4.02 (m, 2H), 2.73 – 2.63 (m, 2H), 1.48 (s, 18H).

<sup>13</sup>C NMR (101 MHz, CDCl<sub>3</sub>) δ 169.5, 142.4, 139.3, 129.1, 125.2, 123.5, 119.8, 116.6, 56.1, 44.9, 34.7, 32.0, 23.4.

FT-IR (thin film): 3046, 2959, 1708, 1598, 1491, 1477, 1404, 1392, 1362, 1308, 1262, 1167, 804, 757, 691 cm<sup>-1</sup>.

[α]<sup>25</sup><sub>D</sub> = –84° (*c* = 1.0, CHCl<sub>3</sub>); 94% ee from (*R*)-L\*.

HR-MS: *m/z* 439.2743 ([M+H]<sup>+</sup>, C<sub>30</sub>H<sub>35</sub>N<sub>2</sub>O<sup>+</sup> calcd. 439.2749).

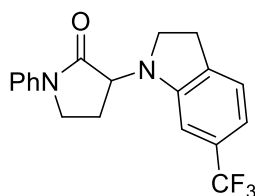

**1-Phenyl-3-(6-(trifluoromethyl)indolin-1-yl)pyrrolidin-2-one (Table 3, entry 14).** The title compound was prepared according to the General Procedure from 3-iodo-1-phenylpyrrolidin-2-one (108 mg, 0.375 mmol) and 6-(trifluoromethyl)indoline (46.8 mg, 0.250 mmol), using 10 mol% of mesitylcopper, 20 mol% of (*R*)-L\*, and 1.5 equiv of Cs<sub>2</sub>CO<sub>3</sub> (122 mg, 0.375 mmol). The reaction was run for 48 h at 25-26 °C. After purification by flash chromatography (10→100% Et<sub>2</sub>O in hexanes) and reverse phase chromatography (0→75% MeOH in H<sub>2</sub>O), the title compound was isolated as a white solid in 69% yield (60 mg) and 86% ee.

The second run was performed with (*S*)-L\*. The product was isolated as a white solid in 59% yield (51 mg) and 90% ee.

HPLC analysis of the product: Diacel CHIRALPAK® IC column; 35% *i*-PrOH in hexanes, 1.0 mL/min flow-rate; retention times: 7.9 min (minor), 10.1 min (major) for (*R*)-L\*.

<sup>1</sup>H NMR (400 MHz, CDCl<sub>3</sub>) δ 7.73 – 7.65 (m, 2H), 7.47 – 7.32 (m, 2H), 7.25 – 7.18 (m, 1H), 7.18 – 7.12 (m, 1H), 7.00 – 6.87 (m, 1H), 6.72 – 6.64 (m, 1H), 4.63 (dd, *J* = 10.5, 8.6 Hz, 1H), 4.12 – 3.79 (m, 2H), 3.79 – 3.49 (m, 2H), 3.24 – 3.00 (m, 2H), 2.63 – 2.37 (m, 1H), 2.39 – 2.11 (m, 1H).

<sup>13</sup>C NMR (101 MHz, CDCl<sub>3</sub>) δ 170.4, 151.2, 139.1, 133.9, 129.8 (q, *J* = 31.5 Hz), 129.0, 125.1, 124.6, 124.6 (q, *J* = 272.1 Hz), 119.7, 115.2 (q, *J* = 4.2 Hz), 103.1 (q, *J* = 3.9 Hz), 58.4, 48.5, 45.0, 28.2, 20.8.



FT-IR (thin film): 3045, 2954, 2853, 1698, 1614, 1598, 1497, 1450, 1402, 1316, 1286, 1160, 1115, 1059, 760, 691  $\text{cm}^{-1}$ .

$[\alpha]^{25}_{\text{D}} = -12^{\circ}$  ( $c = 1.0$ ,  $\text{CHCl}_3$ ); 86% ee from (*R*)-**L**\*.

HR-MS:  $m/z$  347.1365 ( $[\text{M}+\text{H}]^+$ ,  $\text{C}_{19}\text{H}_{18}\text{F}_3\text{N}_2\text{O}^+$  calcd. 347.1371).

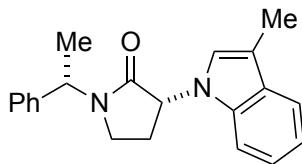

**(3R)-3-(3-Methyl-1H-indol-1-yl)-1-((1S)-1-phenylethyl)pyrrolidin-2-one (Figure 4).** The title compound was prepared according to the General Procedure from 3-iodo-1-((*S*)-1-phenylethyl)pyrrolidin-2-one (1:1 mixture of diastereomers; 118 mg, 0.375 mmol) and 3-methyl-1*H*-indole (32.8 mg, 0.250 mmol), using 10 mol% of mesitylcopper, 20 mol% of (*R*)-**L**\*, and 1.8 equiv of  $\text{Cs}_2\text{CO}_3$  (147 mg, 0.450 mmol). After purification by flash chromatography (20→60%  $\text{Et}_2\text{O}$  in hexanes) and reverse phase chromatography (0→90% MeOH in  $\text{H}_2\text{O}$ ), the title compound was isolated as a white solid in 64% yield (51 mg) and 15:85 dr.

Second run: 61% yield (49 mg) and 15:85 dr.

$^1\text{H}$  NMR (400 MHz,  $\text{CDCl}_3$ )  $\delta$  7.64 – 7.56 (m, 1H), 7.45 – 7.30 (m, 5H), 7.27 – 7.18 (m, 2H), 7.18 – 7.10 (m, 1H), 6.89 (t,  $J = 1.1$  Hz, 1H), 5.69 (q,  $J = 7.1$  Hz, 1H), 5.10 (t,  $J = 8.9$  Hz, 1H), 3.63 – 3.37 (m, 1H), 3.06 (dt,  $J = 10.0, 7.8$  Hz, 1H), 2.62 – 2.44 (m, 1H), 2.35 (d,  $J = 1.1$  Hz, 3H), 2.23 – 2.08 (m, 1H), 1.71 (d,  $J = 7.1$  Hz, 3H).

$^{13}\text{C}$  NMR (101 MHz,  $\text{CDCl}_3$ )  $\delta$  170.1, 139.6, 136.5, 129.4, 128.8, 128.0, 127.4, 123.5, 121.8, 119.3, 119.2, 111.8, 109.3, 57.3, 50.2, 39.4, 26.5, 16.3, 9.8.

FT-IR (thin film): 3050, 2974, 1695, 1490, 1457, 1424, 1283, 1234, 1014, 778, 739  $\text{cm}^{-1}$ .

$[\alpha]^{25}_{\text{D}} = -171^{\circ}$  ( $c = 1.0$ ,  $\text{CHCl}_3$ ); >99% ee from (*R*)-**L**\*.

HR-MS:  $m/z$  319.1807 ( $[\text{M}+\text{H}]^+$ ,  $\text{C}_{21}\text{H}_{23}\text{N}_2\text{O}^+$  calcd. 319.1810).

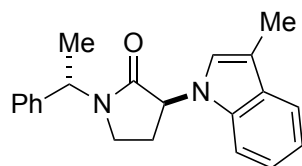

**(3S)-3-(3-Methyl-1H-indol-1-yl)-1-((1S)-1-phenylethyl)pyrrolidin-2-one (Figure 4).** The title compound was prepared according to the General Procedure from 3-iodo-1-((*S*)-1-phenylethyl)pyrrolidin-2-one (118 mg, 0.375 mmol) and 3-methyl-1*H*-indole (32.8 mg, 0.250 mmol), using 10 mol% of mesitylcopper, 20 mol% of (*S*)-**L**\*, and 1.8 equiv of  $\text{Cs}_2\text{CO}_3$  (147 mg, 0.450 mmol). After purification by flash chromatography (20→60%  $\text{Et}_2\text{O}$  in hexanes) and reverse phase chromatography (0→90% MeOH in  $\text{H}_2\text{O}$ ), the product was isolated as a white solid in 68% yield (54 mg) and 94:6 dr.

Second run: 70% yield (56 mg) and 94:6 dr.

$^1\text{H}$  NMR (400 MHz,  $\text{CDCl}_3$ )  $\delta$  7.64 – 7.52 (m, 1H), 7.52 – 7.41 (m, 4H), 7.41 – 7.32 (m, 1H), 7.22 – 7.08 (m, 3H), 6.82 (d,  $J = 1.2$  Hz, 1H), 5.68 (q,  $J = 7.1$  Hz, 1H), 5.16 (t,  $J = 9.1$  Hz, 1H), 3.53 –

3.41 (m, 1H), 3.26 – 3.12 (m, 1H), 2.65 – 2.55 (m, 1H), 2.32 (d,  $J = 1.1$  Hz, 3H), 2.17 – 2.00 (m, 1H), 1.64 (d,  $J = 7.2$  Hz, 3H).

$^{13}\text{C}$  NMR (101 MHz,  $\text{CDCl}_3$ )  $\delta$  170.1, 139.6, 136.3, 129.3, 128.8, 127.9, 127.2, 123.5, 121.7, 119.3, 119.1, 111.8, 109.2, 57.3, 49.9, 39.1, 26.5, 16.1, 9.7.

FT-IR (thin film): 3050, 2976, 1693, 1494, 1462, 1428, 1353, 1285, 1219, 1015, 781, 739  $\text{cm}^{-1}$ .

$[\alpha]_{\text{D}}^{25} = -175^\circ$  ( $c = 1.0$ ,  $\text{CHCl}_3$ ); >99% ee from (S)-**L**\*.

HR-MS:  $m/z$  319.1804 ( $[\text{M}+\text{H}]^+$ ,  $\text{C}_{21}\text{H}_{23}\text{N}_2\text{O}^+$  calcd. 319.1810).

#### IV. Time-Course Experiments (Figures 5 and 6)

**Figure 5.** In a nitrogen-filled glovebox, an oven-dried 4 mL amber-glass vial was charged with 3-methyl-1*H*-indole (26.2 mg, 0.200 mmol) and a solution of mesitylcopper (3.6 mg, 0.020 mmol) in *m*-xylene (200  $\mu$ L). A stir bar was added, and the vial was closed with a screw cap. The mixture was stirred for 10 min, and then a solution of (*S*)-**L**\* (14.1 mg, 0.040 mmol) and an internal standard (4,4'-di-*tert*-butylbiphenyl; 26.6 mg, 0.10 mmol) in *m*-xylene (680  $\mu$ L) was added, and the vial was re-capped. The mixture was stirred for 10 min, and then the  $\alpha$ -iodo- $\gamma$ -lactam (86.1 mg, 0.30 mmol) was added. After the reaction mixture became homogeneous (~5 min), Cs<sub>2</sub>CO<sub>3</sub> (97.7 mg, 0.300 mmol) was added. The vial was re-capped and wrapped thoroughly with electrical tape in order to keep the reaction in the dark. The reaction mixture was stirred vigorously at 24 °C in the glovebox. Aliquots (~20  $\mu$ L) were taken from reaction mixture at various reaction times, and the reactions were immediately quenched by dilution with CH<sub>2</sub>Cl<sub>2</sub> (2 mL) and filtration through a syringe filter. The solvent was removed by evaporation (air flow), leading to a solid yellowish-white residue. The composition of each sample was determined via analysis by <sup>1</sup>H NMR spectroscopy.

The ee's were determined via HPLC analysis: Diacel CHIRALPAK® IC column; 35% *i*-PrOH in hexanes, 1.0 mL/min flow-rate; retention times for the product: 22.5 min (major), 26.5 min (minor); retention times for the electrophile: 13.9 min (major) and 15.0 min (minor) for (*S*)-**L**\*.

**Figure 6.** In a nitrogen-filled glovebox, an oven-dried 4 mL amber-glass vial was charged with 3-methyl-1*H*-indole (26.2 mg, 0.200 mmol) and a solution of mesitylcopper (3.6 mg, 0.020 mmol) in *m*-xylene (200  $\mu$ L). A stir bar was added, and the vial was closed with a screw cap. The mixture was stirred for 10 min, and then a solution of (*S*)-**L**\* (14.1 mg, 0.040 mmol) and an internal standard (4,4'-di-*tert*-butylbiphenyl; 26.6 mg, 0.10 mmol) in *m*-xylene (680  $\mu$ L) was added, and the vial was re-capped. The mixture was stirred for 10 min, and then the  $\alpha$ -bromo- $\gamma$ -lactam (72.0 mg, 0.300 mmol) was added. After the reaction mixture became homogeneous (~5 min), Cs<sub>2</sub>CO<sub>3</sub> (97.7 mg, 0.300 mmol) was added. The vial was re-capped and wrapped thoroughly with electrical tape in order to keep the reaction in the dark. The reaction mixture was stirred vigorously at 24 °C in the glovebox. Aliquots (~200  $\mu$ L) were taken from reaction mixture at various reaction times, and the reactions were immediately quenched by dilution with CH<sub>2</sub>Cl<sub>2</sub> (2 mL) and filtration through a syringe filter. The solvent was removed by evaporation (air flow), leading to a solid yellowish-white residue. The composition of each sample was determined via analysis by <sup>1</sup>H NMR spectroscopy.

The ee's were determined via HPLC analysis: Diacel CHIRALPAK® IC column; 35% *i*-PrOH in hexanes, 1.0 mL/min flow-rate; retention times for the product: 22.5 min (major), 26.5 min (minor); retention times for the electrophile 12.8 min (major) and 17.0 min (minor) for (*S*)-**L**\*.

## V. Synthesis and Reactivity of Copper Complex B (from (R)-L\*)

**Preparation of copper complex B (eq 2).** In a nitrogen-filled glovebox, an oven-dried 4 mL amber-glass vial was charged with 3-methyl-1*H*-indole (16.4 mg, 0.125 mmol), mesitylcopper (22.8 mg, 0.125 mmol), a stir bar, and then benzene (0.5 mL). The mixture was stirred for 10 min, and then a solution of (R)-L\* (88.5 mg, 0.250 mmol) in benzene (1.5 mL) was added. The mixture was stirred for 16 h, and then it was concentrated to ~0.25 mL, and pentane (2.0 mL) was added dropwise. The mixture was stirred for 1 h, and then the resulting white precipitate of copper complex **B** was filtered, rinsed with pentane (5 mL), and dried to give the desired product as a white powder in 65% yield (73 mg). X-ray quality crystals were obtained by slow evaporation of the solvent from a saturated solution in a mixture of benzene/Et<sub>2</sub>O/pentane.

<sup>1</sup>H NMR (400 MHz, C<sub>6</sub>D<sub>6</sub>) δ 8.01 (d, *J* = 7.6 Hz, 1H), 7.40 – 7.27 (m, 1H), 7.15 – 6.79 (m, 21H), 6.65 (t, *J* = 7.5 Hz, 2H), 5.70 (d, *J* = 7.5 Hz, 2H), 3.32 (d, *J* = 14.0 Hz, 2H), 3.24 (t, *J* = 11.1 Hz, 2H), 2.88 (d, *J* = 12.0 Hz, 2H), 2.78 – 2.66 (m, 4H), 2.70 (s, 3H), 2.63 – 2.51 (m, 4H), 2.38 (d, *J* = 14.0 Hz, 2H), 1.94 (ddd, *J* = 24.8, 12.2, 6.5 Hz, 4H), 1.87 – 1.69 (m, 4H).

<sup>13</sup>C NMR (101 MHz, C<sub>6</sub>D<sub>6</sub>) δ 147.6, 147.4, 147.1, 142.9, 142.6, 135.8, 132.9 (d, *J* = 13.3 Hz), 132.1 (d, *J* = 15.3 Hz), 131.2, 130.5, 129.9, 129.6, 128.8, 128.6, 126.3, 123.2 (d, *J* = 20.3 Hz), 117.8 (d, *J* = 19.4 Hz), 115.7 (d, *J* = 19.4 Hz), 108.1, 61.4, 38.0 (d, *J* = 47.9 Hz), 30.6, 30.2 (d, *J* = 17.6 Hz), 25.3 (d, *J* = 7.4 Hz), 10.7.

<sup>31</sup>P {<sup>1</sup>H} NMR (162 MHz, C<sub>6</sub>D<sub>6</sub>) δ -13.8.

**Copper complex B as a catalyst.** In a nitrogen-filled glovebox, an oven-dried 4 mL amber-glass vial was charged with 3-methyl-1*H*-indole (13.1 mg, 0.100 mmol), a stir bar, and a solution of complex **B** (9.0 mg, 0.010 mmol) in *m*-xylene (200 μL). The vial was closed with a screw cap, the reaction mixture was stirred for 10 min, and then the α-iodo-γ-lactam (**A**; 43.1 mg, 0.150 mmol) and an internal standard (4,4'-di-*tert*-butylbiphenyl; 9.8 mg, 0.037 mmol) were added. After the reaction mixture became homogeneous (~5 min), Cs<sub>2</sub>CO<sub>3</sub> (58.7 mg, 0.180 mmol) was added. The vial was re-capped and wrapped thoroughly with electrical tape in order to keep the reaction in the dark. The reaction mixture was stirred vigorously (1500 rpm) at 24 °C in the glovebox. After 72 h, the reaction mixture was diluted with CDCl<sub>3</sub> (1 mL). A portion of the mixture was removed for purification by preparative TLC (40% Et<sub>2</sub>O in hexanes) and then ee analysis. The remainder of the mixture was filtered through a syringe filter, and the solvent was removed by evaporation (air flow), until a solid yellowish-white residue remained. The residue was then redissolved in CDCl<sub>3</sub> and analyzed via <sup>1</sup>H NMR spectroscopy.

The ee was determined via HPLC analysis: Diacel CHIRALPAK® IC column; 35% *i*-PrOH in hexanes, 1.0 mL/min flow-rate; retention times for the product: 22.5 min (minor), 26.5 min (major).

Run 1: 95% yield, 80% ee; Run 2: 98% yield, 77% ee.

**Stoichiometric reaction of copper complex B with an alkyl iodide (eq 3).** In a nitrogen-filled glovebox, an oven-dried 4 mL amber-glass vial was charged with copper complex **B** (9.0

mg, 0.010 mmol), a stir bar, and a solution of  $\alpha$ -iodo- $\gamma$ -lactam (**A**; 5.7 mg, 0.020 mmol) and internal standard (4,4'-di-*tert*-butylbiphenyl, 4.8 mg, 0.018 mmol) in *d*<sub>8</sub>-toluene (150  $\mu$ L). The vial was then closed with a screw cap, and the reaction mixture was stirred vigorously for 15 min at 24 °C in the glovebox. The vial was then removed from the glovebox, and the reaction mixture was diluted with CDCl<sub>3</sub> (1 mL) and filtered through a syringe filter. An aliquot (50  $\mu$ L) of the filtrate was used for analysis via <sup>1</sup>H NMR spectroscopy. A sample of purified product was obtained via preparative TLC (40% Et<sub>2</sub>O in hexanes).

The ee of the product was determined via HPLC analysis: Diacel CHIRALPAK® IC column; 35% *i*-PrOH in hexanes, 1.0 mL/min flow-rate; retention times for the product: 22.5 min (minor), 26.5 min (major). The yield was determined via <sup>1</sup>H NMR spectroscopy. 94% yield, 87% ee.

**Stoichiometric reactions of copper complex B with alkyl bromides (Table 4).** In a nitrogen-filled glovebox, two parallel reactions were prepared. Two oven-dried 4 mL amber-glass vials were charged with copper complex **B** (9.0 mg, 0.010 mmol) and a stir bar. A solution of (*S*)- $\alpha$ -bromo- $\gamma$ -lactam (3.6 mg, 0.015 mmol) and an internal standard (4,4'-di-*tert*-butylbiphenyl; 4.0 mg, 0.015 mmol) in *d*<sub>8</sub>-toluene (150  $\mu$ L) was added to the first vial, and a solution of (*R*)- $\alpha$ -bromo- $\gamma$ -lactam (3.6 mg, 0.015 mmol) and an internal standard (4,4'-di-*tert*-butylbiphenyl; 4.0 mg, 0.015 mmol) in *d*<sub>8</sub>-toluene (150  $\mu$ L) was added to the second vial. The vials were closed with a screw cap, and the reaction mixtures were stirred vigorously for 4 h at 24 °C in the glovebox. Aliquots (~100  $\mu$ L) were taken from the reaction mixtures at different times, and they were immediately quenched by dilution with CH<sub>2</sub>Cl<sub>2</sub> (2 mL) and filtration through a syringe filter. The composition of each sample was determined via analysis by <sup>1</sup>H NMR spectroscopy. Samples of purified product were obtained via preparative TLC (40% Et<sub>2</sub>O in hexanes).

The ee's were determined via HPLC analysis: Diacel CHIRALPAK® IC column; 35% *i*-PrOH in hexanes, 1.0 mL/min flow-rate; retention times for: (*S*)-product 22.5 min, (*R*)-product 26.5 min. The stereochemical outcomes have been unambiguously determined via X-ray crystallographic characterization of the electrophile and product (see Section VII).

## VI. Study of Non-Linear Effects

**Non-linear effect (electrophile A, as well as its bromide analogue).** In a nitrogen-filled glovebox, an oven-dried 4 mL amber-glass vial was charged with a 50  $\mu$ L aliquot that contained 3-methyl-1*H*-indole (6.6 mg, 0.050 mmol), mesitylcopper (0.91 mg, 0.0050 mmol), and an internal standard (4,4'-di-*tert*-butylbiphenyl; 2.9 mg, 0.011) in *m*-xylene, taken from a stock solution. To this vial was added a 100  $\mu$ L aliquot that contained L\* of known ee (0.010 mmol) in *m*-xylene, also taken from a stock solution. The vial was charged with a stir bar and stirred for 10 min. Next, a solution of the electrophile (0.075 mmol) in *m*-xylene (150  $\mu$ L) was added. The vial was re-capped and wrapped thoroughly with electrical tape in order to keep the reaction in the dark. The reaction mixture was stirred vigorously for 4 h at 24 °C in glovebox. After this time, the reaction mixture was removed from the glovebox, diluted with CDCl<sub>3</sub> (2 mL), and filtered through a syringe filter. An aliquot (50  $\mu$ L) of the filtrate was analyzed via <sup>1</sup>H NMR spectroscopy (yield of product: ~9-10%). Pure product was obtained by preparative TLC (40% Et<sub>2</sub>O in hexanes).

This study was performed with 24 parallel reactions containing L\* (range of ee's) and the  $\alpha$ -iodo- $\gamma$ -lactam (12 reactions) or the  $\alpha$ -bromo- $\gamma$ -lactam (12 reactions).

The ee of the product was determined via HPLC analysis: Diacel CHIRALPAK® IC column; 35% *i*-PrOH in hexanes, 1.0 mL/min flow-rate; retention times: 22.5 min, 26.5 min.

The ee of the L\* used in each reaction was determined via HPLC analysis of the L\* oxide: Diacel CHIRALPAK® AD column; 40% *i*-PrOH in hexanes, 1.0 mL/min flow-rate; retention times: (*S*)-L\* oxide 5.0 min, (*R*)-L\* oxide 15.4 min.

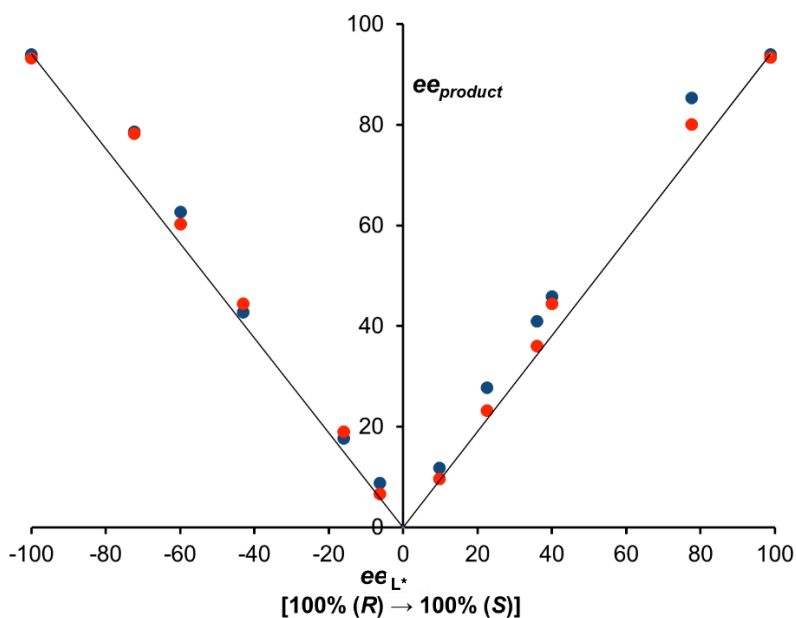

**Figure S-2.** Dependence of the ee of the product on the ee of L\*: Blue: alkyl iodide; b) Red: alkyl bromide.

## VII. X-Ray Crystallography, Including Absolute Configuration

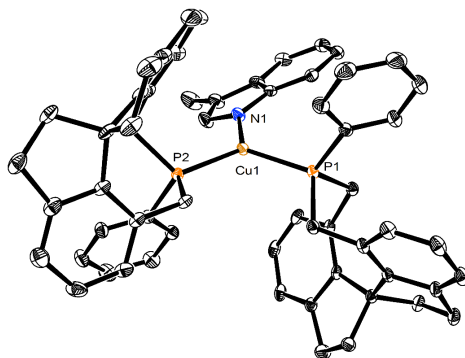

**Figure S-3.** Structure of copper complex **B**. Disordered solvent is omitted for clarity.

**Copper complex B.** A crystal suitable for X-ray crystallography was grown by slow evaporation of solvent from a saturated solution of copper complex **B** in a benzene/pentane mixture.

Low-temperature diffraction data ( $\phi$ - and  $\omega$ -scans) were collected on a Bruker AXS D8 VENTURE KAPPA diffractometer coupled to a PHOTON 100 CMOS detector with Mo  $K_{\alpha}$  radiation ( $\lambda = 0.71073 \text{ \AA}$ ) from an  $I\mu S$  micro-source. The structure was solved by direct methods using SHELXS and refined against  $F^2$  on all data by full-matrix least squares with SHELXL-2014 using established refinement techniques.<sup>5</sup> All non-hydrogen atoms were refined anisotropically. All hydrogen atoms were included into the model at geometrically calculated positions and refined using a riding model. The isotropic displacement parameters of all hydrogen atoms were fixed to 1.2 times the  $U$  value of the atoms they are linked to (1.5 times for methyl groups). All disordered atoms were refined with the help of similarity restraints on the 1,2- and 1,3-distances and displacement parameters as well as rigid bond restraints for anisotropic displacement parameters.

Copper complex **B** crystallized in the tetragonal space group  $P4_3$  with one molecule in the asymmetric unit along with half a molecule of pentane. The pentane molecule is located near a crystallographic  $4_3$ -screw axis. It was modeled as a disorder with two unique components in addition to the components generated by the  $4_3$ -screw axis.

---

(5) Sheldrick, G. M. A Short History of SHELX. *Acta Crystallogr. A* **2008**, *64*, 112–122.

**Table S-1.** Crystal data and structure refinement for crystal\_02.

|                                   |                                                                                                 |
|-----------------------------------|-------------------------------------------------------------------------------------------------|
| Identification code               | crystal_02                                                                                      |
| Empirical formula                 | C <sub>61.50</sub> H <sub>60</sub> CuNP <sub>2</sub>                                            |
| Formula weight                    | 938.58                                                                                          |
| Temperature                       | 100(2) K                                                                                        |
| Wavelength                        | 0.71073 Å                                                                                       |
| Crystal system                    | Tetragonal                                                                                      |
| Space group                       | P4 <sub>3</sub>                                                                                 |
| Unit cell dimensions              | a = 21.5667(6) Å     α = 90°.<br>b = 21.5667(6) Å     β = 90°.<br>c = 10.3865(3) Å     γ = 90°. |
| Volume                            | 4831.0(3) Å <sup>3</sup>                                                                        |
| Z                                 | 4                                                                                               |
| Density (calculated)              | 1.290 Mg/m <sup>3</sup>                                                                         |
| Absorption coefficient            | 0.560 mm <sup>-1</sup>                                                                          |
| F(000)                            | 1980                                                                                            |
| Crystal size                      | 0.300 × 0.100 × 0.100 mm <sup>3</sup>                                                           |
| Theta range for data collection   | 2.372 to 36.351°                                                                                |
| Index ranges                      | -35 ≤ h ≤ 35, -35 ≤ k ≤ 35, -15 ≤ l ≤ 17                                                        |
| Reflections collected             | 86761                                                                                           |
| Independent reflections           | 23032 [R(int) = 0.0533]                                                                         |
| Completeness to theta = 25.242°   | 99.8 %                                                                                          |
| Absorption correction             | Semi-empirical from equivalents                                                                 |
| Max. and min. transmission        | 0.7471 and 0.6762                                                                               |
| Refinement method                 | Full-matrix least-squares on F <sup>2</sup>                                                     |
| Data / restraints / parameters    | 23032 / 172 / 660                                                                               |
| Goodness-of-fit on F <sup>2</sup> | 1.016                                                                                           |
| Final R indices [I > 2σ(I)]       | R1 = 0.0461, wR2 = 0.0853                                                                       |
| R indices (all data)              | R1 = 0.0773, wR2 = 0.0942                                                                       |
| Absolute structure parameter      | -0.007(3)                                                                                       |
| Extinction coefficient            | n/a                                                                                             |
| Largest diff. peak and hole       | 0.464 and -0.435 e/Å <sup>-3</sup>                                                              |



**Table S–2.** Atomic coordinates ( $\times 10^4$ ) and equivalent isotropic displacement parameters ( $\text{\AA}^2 \times 10^3$ ) for crystal\_02.  $U(\text{eq})$  is defined as one-third of the trace of the orthogonalized  $U_{ij}$  tensor.

|       | x       | y        | z        | $U(\text{eq})$ |
|-------|---------|----------|----------|----------------|
| Cu(1) | 2491(1) | 7377(1)  | 7838(1)  | 13(1)          |
| P(1)  | 2006(1) | 8278(1)  | 8125(1)  | 13(1)          |
| C(1)  | 1864(1) | 8476(1)  | 9837(2)  | 14(1)          |
| C(2)  | 1918(1) | 9648(1)  | 10118(2) | 14(1)          |
| C(3)  | 1571(1) | 9100(1)  | 10036(2) | 14(1)          |
| C(4)  | 925(1)  | 9149(1)  | 10051(2) | 19(1)          |
| C(5)  | 629(1)  | 9718(1)  | 10183(2) | 22(1)          |
| C(6)  | 977(1)  | 10257(1) | 10279(2) | 21(1)          |
| C(7)  | 1616(1) | 10222(1) | 10225(2) | 17(1)          |
| C(8)  | 2076(1) | 10746(1) | 10232(2) | 20(1)          |
| C(9)  | 2660(1) | 10435(1) | 9690(2)  | 18(1)          |
| C(10) | 2617(1) | 9752(1)  | 10164(2) | 14(1)          |
| C(11) | 2859(1) | 9715(1)  | 11571(2) | 18(1)          |
| C(12) | 3563(1) | 9622(1)  | 11440(2) | 23(1)          |
| C(13) | 3617(1) | 9271(1)  | 10189(2) | 16(1)          |
| C(14) | 4124(1) | 8930(1)  | 9744(2)  | 19(1)          |
| C(15) | 4071(1) | 8626(1)  | 8562(2)  | 19(1)          |
| C(16) | 3524(1) | 8656(1)  | 7859(2)  | 17(1)          |
| C(17) | 3014(1) | 9009(1)  | 8294(2)  | 14(1)          |
| C(18) | 3071(1) | 9322(1)  | 9466(2)  | 14(1)          |
| C(19) | 2412(1) | 8980(1)  | 7556(2)  | 14(1)          |
| C(21) | 1228(1) | 8314(1)  | 7455(2)  | 16(1)          |
| C(22) | 1001(1) | 8824(1)  | 6765(2)  | 23(1)          |
| C(23) | 395(1)  | 8820(1)  | 6305(3)  | 31(1)          |
| C(24) | 10(1)   | 8320(1)  | 6537(3)  | 32(1)          |
| C(25) | 234(1)  | 7808(1)  | 7209(3)  | 30(1)          |
| C(26) | 842(1)  | 7805(1)  | 7646(2)  | 23(1)          |
| P(2)  | 2516(1) | 6684(1)  | 9432(1)  | 12(1)          |
| C(31) | 1934(1) | 6813(1)  | 10719(2) | 15(1)          |
| C(32) | 1650(1) | 5757(1)  | 11676(2) | 16(1)          |
| C(33) | 1937(1) | 6338(1)  | 11781(2) | 15(1)          |
| C(34) | 2287(1) | 6463(1)  | 12884(2) | 20(1)          |
| C(35) | 2366(1) | 6023(1)  | 13841(2) | 26(1)          |
| C(36) | 2104(1) | 5437(1)  | 13704(2) | 29(1)          |
| C(37) | 1749(1) | 5310(1)  | 12626(2) | 22(1)          |
| C(38) | 1430(1) | 4707(1)  | 12279(3) | 27(1)          |
| C(39) | 1291(1) | 4797(1)  | 10840(2) | 23(1)          |
| C(40) | 1196(1) | 5507(1)  | 10670(2) | 17(1)          |
| C(41) | 515(1)  | 5677(1)  | 11028(3) | 24(1)          |
| C(42) | 140(1)  | 5571(1)  | 9794(3)  | 30(1)          |
| C(43) | 607(1)  | 5710(1)  | 8756(3)  | 23(1)          |
| C(44) | 503(1)  | 5840(1)  | 7468(3)  | 30(1)          |

|       |          |          |          |        |
|-------|----------|----------|----------|--------|
| C(45) | 1001(1)  | 5959(1)  | 6663(3)  | 32(1)  |
| C(46) | 1602(1)  | 5954(1)  | 7156(2)  | 25(1)  |
| C(47) | 1717(1)  | 5823(1)  | 8453(2)  | 17(1)  |
| C(48) | 1213(1)  | 5697(1)  | 9253(2)  | 17(1)  |
| C(49) | 2365(1)  | 5871(1)  | 8968(2)  | 15(1)  |
| C(51) | 3277(1)  | 6633(1)  | 10194(2) | 14(1)  |
| C(52) | 3453(1)  | 6145(1)  | 10995(2) | 18(1)  |
| C(53) | 4053(1)  | 6110(1)  | 11467(2) | 24(1)  |
| C(54) | 4485(1)  | 6563(1)  | 11147(3) | 26(1)  |
| C(55) | 4315(1)  | 7051(1)  | 10346(3) | 24(1)  |
| C(56) | 3715(1)  | 7086(1)  | 9874(2)  | 17(1)  |
| N(1)  | 2963(1)  | 7240(1)  | 6297(2)  | 18(1)  |
| C(61) | 3526(1)  | 6928(1)  | 6239(2)  | 24(1)  |
| C(62) | 3832(1)  | 7019(1)  | 5093(2)  | 24(1)  |
| C(69) | 4450(1)  | 6761(2)  | 4686(3)  | 38(1)  |
| C(63) | 3443(1)  | 7415(1)  | 4356(2)  | 18(1)  |
| C(64) | 3486(1)  | 7674(1)  | 3119(2)  | 20(1)  |
| C(65) | 3018(1)  | 8056(1)  | 2681(2)  | 21(1)  |
| C(66) | 2494(1)  | 8176(1)  | 3450(2)  | 19(1)  |
| C(67) | 2435(1)  | 7922(1)  | 4672(2)  | 17(1)  |
| C(68) | 2915(1)  | 7541(1)  | 5132(2)  | 14(1)  |
| C(1S) | 5187(14) | 5199(9)  | 9570(20) | 63(6)  |
| C(2S) | 5351(13) | 5747(8)  | 8880(20) | 68(4)  |
| C(3S) | 4998(13) | 5940(9)  | 7765(19) | 82(4)  |
| C(4S) | 4764(14) | 5440(10) | 6890(20) | 83(4)  |
| C(5S) | 4149(13) | 5367(13) | 6540(30) | 86(5)  |
| C(1T) | 5220(9)  | 6268(9)  | 8020(20) | 83(5)  |
| C(2T) | 4746(10) | 5803(7)  | 7976(16) | 66(3)  |
| C(3T) | 4766(14) | 5280(11) | 7120(30) | 81(4)  |
| C(4T) | 4493(12) | 5149(10) | 5944(18) | 95(4)  |
| C(5T) | 4034(15) | 4679(13) | 5730(30) | 129(8) |

**Table S-3.** Bond lengths [Å] and angles [°] for crystal\_02.

| Bond length [Å] |            | Bond angle [°]   |            |
|-----------------|------------|------------------|------------|
| Cu(1)-N(1)      | 1.9202(19) | N(1)-Cu(1)-P(1)  | 119.70(6)  |
| Cu(1)-P(1)      | 2.2277(6)  | N(1)-Cu(1)-P(2)  | 120.17(6)  |
| Cu(1)-P(2)      | 2.2318(6)  | P(1)-Cu(1)-P(2)  | 119.75(2)  |
| P(1)-C(21)      | 1.817(2)   | C(21)-P(1)-C(19) | 106.29(10) |
| P(1)-C(19)      | 1.844(2)   | C(21)-P(1)-C(1)  | 101.87(10) |
| P(1)-C(1)       | 1.854(2)   | C(19)-P(1)-C(1)  | 101.37(10) |
| C(1)-C(3)       | 1.501(3)   | C(21)-P(1)-Cu(1) | 114.81(7)  |
| C(1)-H(1A)      | 0.9900     | C(19)-P(1)-Cu(1) | 116.68(7)  |
| C(1)-H(1B)      | 0.9900     | C(1)-P(1)-Cu(1)  | 113.97(7)  |
| C(2)-C(3)       | 1.401(3)   | C(3)-C(1)-P(1)   | 114.06(14) |
| C(2)-C(7)       | 1.403(3)   | C(3)-C(1)-H(1A)  | 108.7      |
| C(2)-C(10)      | 1.526(3)   | P(1)-C(1)-H(1A)  | 108.7      |
| C(3)-C(4)       | 1.399(3)   | C(3)-C(1)-H(1B)  | 108.7      |
| C(4)-C(5)       | 1.390(3)   | P(1)-C(1)-H(1B)  | 108.7      |
| C(4)-H(4)       | 0.9500     | H(1A)-C(1)-H(1B) | 107.6      |
| C(5)-C(6)       | 1.386(3)   | C(3)-C(2)-C(7)   | 120.10(19) |
| C(5)-H(5)       | 0.9500     | C(3)-C(2)-C(10)  | 130.71(18) |
| C(6)-C(7)       | 1.380(3)   | C(7)-C(2)-C(10)  | 109.14(18) |
| C(6)-H(6)       | 0.9500     | C(4)-C(3)-C(2)   | 117.83(19) |
| C(7)-C(8)       | 1.504(3)   | C(4)-C(3)-C(1)   | 119.25(19) |
| C(8)-C(9)       | 1.535(3)   | C(2)-C(3)-C(1)   | 122.75(18) |
| C(8)-H(8A)      | 0.9900     | C(5)-C(4)-C(3)   | 121.7(2)   |
| C(8)-H(8B)      | 0.9900     | C(5)-C(4)-H(4)   | 119.2      |
| C(9)-C(10)      | 1.557(3)   | C(3)-C(4)-H(4)   | 119.2      |
| C(9)-H(9A)      | 0.9900     | C(6)-C(5)-C(4)   | 119.9(2)   |
| C(9)-H(9B)      | 0.9900     | C(6)-C(5)-H(5)   | 120.1      |
| C(10)-C(18)     | 1.530(3)   | C(4)-C(5)-H(5)   | 120.1      |
| C(10)-C(11)     | 1.554(3)   | C(7)-C(6)-C(5)   | 119.5(2)   |
| C(11)-C(12)     | 1.538(3)   | C(7)-C(6)-H(6)   | 120.3      |
| C(11)-H(11A)    | 0.9900     | C(5)-C(6)-H(6)   | 120.3      |
| C(11)-H(11B)    | 0.9900     | C(6)-C(7)-C(2)   | 121.0(2)   |
| C(12)-C(13)     | 1.508(3)   | C(6)-C(7)-C(8)   | 128.13(19) |
| C(12)-H(12A)    | 0.9900     | C(2)-C(7)-C(8)   | 110.89(18) |
| C(12)-H(12B)    | 0.9900     | C(7)-C(8)-C(9)   | 102.25(17) |
| C(13)-C(14)     | 1.398(3)   | C(7)-C(8)-H(8A)  | 111.3      |
| C(13)-C(18)     | 1.401(3)   | C(9)-C(8)-H(8A)  | 111.3      |
| C(14)-C(15)     | 1.396(3)   | C(7)-C(8)-H(8B)  | 111.3      |
| C(14)-H(14)     | 0.9500     | C(9)-C(8)-H(8B)  | 111.3      |
| C(15)-C(16)     | 1.388(3)   | H(8A)-C(8)-H(8B) | 109.2      |
| C(15)-H(15)     | 0.9500     | C(8)-C(9)-C(10)  | 104.39(17) |
| C(16)-C(17)     | 1.412(3)   | C(8)-C(9)-H(9A)  | 110.9      |
| C(16)-H(16)     | 0.9500     | C(10)-C(9)-H(9A) | 110.9      |

|              |          |                     |            |
|--------------|----------|---------------------|------------|
| C(17)-C(18)  | 1.397(3) | C(8)-C(9)-H(9B)     | 110.9      |
| C(17)-C(19)  | 1.509(3) | C(10)-C(9)-H(9B)    | 110.9      |
| C(19)-H(19A) | 0.9900   | H(9A)-C(9)-H(9B)    | 108.9      |
| C(19)-H(19B) | 0.9900   | C(2)-C(10)-C(18)    | 121.87(17) |
| C(21)-C(26)  | 1.394(3) | C(2)-C(10)-C(11)    | 110.71(17) |
| C(21)-C(22)  | 1.401(3) | C(18)-C(10)-C(11)   | 101.58(16) |
| C(22)-C(23)  | 1.392(3) | C(2)-C(10)-C(9)     | 100.79(16) |
| C(22)-H(22)  | 0.9500   | C(18)-C(10)-C(9)    | 112.70(17) |
| C(23)-C(24)  | 1.382(4) | C(11)-C(10)-C(9)    | 109.04(18) |
| C(23)-H(23)  | 0.9500   | C(12)-C(11)-C(10)   | 104.76(17) |
| C(24)-C(25)  | 1.393(4) | C(12)-C(11)-H(11A)  | 110.8      |
| C(24)-H(24)  | 0.9500   | C(10)-C(11)-H(11A)  | 110.8      |
| C(25)-C(26)  | 1.386(3) | C(12)-C(11)-H(11B)  | 110.8      |
| C(25)-H(25)  | 0.9500   | C(10)-C(11)-H(11B)  | 110.8      |
| C(26)-H(26)  | 0.9500   | H(11A)-C(11)-H(11B) | 108.9      |
| P(2)-C(51)   | 1.825(2) | C(13)-C(12)-C(11)   | 102.53(18) |
| P(2)-C(49)   | 1.848(2) | C(13)-C(12)-H(12A)  | 111.3      |
| P(2)-C(31)   | 1.854(2) | C(11)-C(12)-H(12A)  | 111.3      |
| C(31)-C(33)  | 1.505(3) | C(13)-C(12)-H(12B)  | 111.3      |
| C(31)-H(31A) | 0.9900   | C(11)-C(12)-H(12B)  | 111.3      |
| C(31)-H(31B) | 0.9900   | H(12A)-C(12)-H(12B) | 109.2      |
| C(32)-C(37)  | 1.396(3) | C(14)-C(13)-C(18)   | 121.4(2)   |
| C(32)-C(33)  | 1.403(3) | C(14)-C(13)-C(12)   | 127.6(2)   |
| C(32)-C(40)  | 1.530(3) | C(18)-C(13)-C(12)   | 111.04(18) |
| C(33)-C(34)  | 1.397(3) | C(15)-C(14)-C(13)   | 118.3(2)   |
| C(34)-C(35)  | 1.385(3) | C(15)-C(14)-H(14)   | 120.8      |
| C(34)-H(34)  | 0.9500   | C(13)-C(14)-H(14)   | 120.8      |
| C(35)-C(36)  | 1.390(4) | C(16)-C(15)-C(14)   | 120.67(19) |
| C(35)-H(35)  | 0.9500   | C(16)-C(15)-H(15)   | 119.7      |
| C(36)-C(37)  | 1.384(4) | C(14)-C(15)-H(15)   | 119.7      |
| C(36)-H(36)  | 0.9500   | C(15)-C(16)-C(17)   | 121.3(2)   |
| C(37)-C(38)  | 1.516(3) | C(15)-C(16)-H(16)   | 119.4      |
| C(38)-C(39)  | 1.537(4) | C(17)-C(16)-H(16)   | 119.4      |
| C(38)-H(38A) | 0.9900   | C(18)-C(17)-C(16)   | 118.00(19) |
| C(38)-H(38B) | 0.9900   | C(18)-C(17)-C(19)   | 122.62(18) |
| C(39)-C(40)  | 1.555(3) | C(16)-C(17)-C(19)   | 119.05(19) |
| C(39)-H(39A) | 0.9900   | C(17)-C(18)-C(13)   | 120.28(19) |
| C(39)-H(39B) | 0.9900   | C(17)-C(18)-C(10)   | 130.48(18) |
| C(40)-C(48)  | 1.528(3) | C(13)-C(18)-C(10)   | 109.24(18) |
| C(40)-C(41)  | 1.559(3) | C(17)-C(19)-P(1)    | 106.29(14) |
| C(41)-C(42)  | 1.533(4) | C(17)-C(19)-H(19A)  | 110.5      |
| C(41)-H(41A) | 0.9900   | P(1)-C(19)-H(19A)   | 110.5      |
| C(41)-H(41B) | 0.9900   | C(17)-C(19)-H(19B)  | 110.5      |
| C(42)-C(43)  | 1.506(4) | P(1)-C(19)-H(19B)   | 110.5      |
| C(42)-H(42A) | 0.9900   | H(19A)-C(19)-H(19B) | 108.7      |

|              |           |                     |            |
|--------------|-----------|---------------------|------------|
| C(42)-H(42B) | 0.9900    | C(26)-C(21)-C(22)   | 118.9(2)   |
| C(43)-C(44)  | 1.386(4)  | C(26)-C(21)-P(1)    | 117.63(17) |
| C(43)-C(48)  | 1.405(3)  | C(22)-C(21)-P(1)    | 123.50(18) |
| C(44)-C(45)  | 1.384(4)  | C(23)-C(22)-C(21)   | 119.9(2)   |
| C(44)-H(44)  | 0.9500    | C(23)-C(22)-H(22)   | 120.0      |
| C(45)-C(46)  | 1.395(4)  | C(21)-C(22)-H(22)   | 120.0      |
| C(45)-H(45)  | 0.9500    | C(24)-C(23)-C(22)   | 120.7(2)   |
| C(46)-C(47)  | 1.398(3)  | C(24)-C(23)-H(23)   | 119.7      |
| C(46)-H(46)  | 0.9500    | C(22)-C(23)-H(23)   | 119.7      |
| C(47)-C(48)  | 1.394(3)  | C(23)-C(24)-C(25)   | 119.7(2)   |
| C(47)-C(49)  | 1.501(3)  | C(23)-C(24)-H(24)   | 120.1      |
| C(49)-H(49A) | 0.9900    | C(25)-C(24)-H(24)   | 120.1      |
| C(49)-H(49B) | 0.9900    | C(26)-C(25)-C(24)   | 119.8(2)   |
| C(51)-C(52)  | 1.394(3)  | C(26)-C(25)-H(25)   | 120.1      |
| C(51)-C(56)  | 1.399(3)  | C(24)-C(25)-H(25)   | 120.1      |
| C(52)-C(53)  | 1.386(3)  | C(25)-C(26)-C(21)   | 120.9(2)   |
| C(52)-H(52)  | 0.9500    | C(25)-C(26)-H(26)   | 119.5      |
| C(53)-C(54)  | 1.391(4)  | C(21)-C(26)-H(26)   | 119.5      |
| C(53)-H(53)  | 0.9500    | C(51)-P(2)-C(49)    | 102.36(9)  |
| C(54)-C(55)  | 1.389(4)  | C(51)-P(2)-C(31)    | 107.78(10) |
| C(54)-H(54)  | 0.9500    | C(49)-P(2)-C(31)    | 102.19(9)  |
| C(55)-C(56)  | 1.387(3)  | C(51)-P(2)-Cu(1)    | 112.57(7)  |
| C(55)-H(55)  | 0.9500    | C(49)-P(2)-Cu(1)    | 115.95(7)  |
| C(56)-H(56)  | 0.9500    | C(31)-P(2)-Cu(1)    | 114.73(7)  |
| N(1)-C(68)   | 1.377(3)  | C(33)-C(31)-P(2)    | 115.06(14) |
| N(1)-C(61)   | 1.388(3)  | C(33)-C(31)-H(31A)  | 108.5      |
| C(61)-C(62)  | 1.376(3)  | P(2)-C(31)-H(31A)   | 108.5      |
| C(61)-H(61)  | 0.9500    | C(33)-C(31)-H(31B)  | 108.5      |
| C(62)-C(63)  | 1.422(3)  | P(2)-C(31)-H(31B)   | 108.5      |
| C(62)-C(69)  | 1.503(3)  | H(31A)-C(31)-H(31B) | 107.5      |
| C(69)-H(69A) | 0.9800    | C(37)-C(32)-C(33)   | 119.6(2)   |
| C(69)-H(69B) | 0.9800    | C(37)-C(32)-C(40)   | 109.72(18) |
| C(69)-H(69C) | 0.9800    | C(33)-C(32)-C(40)   | 130.6(2)   |
| C(63)-C(64)  | 1.404(3)  | C(34)-C(33)-C(32)   | 118.3(2)   |
| C(63)-C(68)  | 1.421(3)  | C(34)-C(33)-C(31)   | 118.20(18) |
| C(64)-C(65)  | 1.380(3)  | C(32)-C(33)-C(31)   | 123.27(19) |
| C(64)-H(64)  | 0.9500    | C(35)-C(34)-C(33)   | 121.5(2)   |
| C(65)-C(66)  | 1.408(3)  | C(35)-C(34)-H(34)   | 119.3      |
| C(65)-H(65)  | 0.9500    | C(33)-C(34)-H(34)   | 119.3      |
| C(66)-C(67)  | 1.389(3)  | C(34)-C(35)-C(36)   | 120.0(2)   |
| C(66)-H(66)  | 0.9500    | C(34)-C(35)-H(35)   | 120.0      |
| C(67)-C(68)  | 1.405(3)  | C(36)-C(35)-H(35)   | 120.0      |
| C(67)-H(67)  | 0.9500    | C(37)-C(36)-C(35)   | 119.1(2)   |
| C(1S)-C(2S)  | 1.422(18) | C(37)-C(36)-H(36)   | 120.4      |
| C(1S)-H(1S1) | 0.9800    | C(35)-C(36)-H(36)   | 120.4      |

|              |           |                     |            |
|--------------|-----------|---------------------|------------|
| C(1S)-H(1S2) | 0.9800    | C(36)-C(37)-C(32)   | 121.3(2)   |
| C(1S)-H(1S3) | 0.9800    | C(36)-C(37)-C(38)   | 127.8(2)   |
| C(2S)-C(3S)  | 1.451(19) | C(32)-C(37)-C(38)   | 110.8(2)   |
| C(2S)-H(2S1) | 0.9900    | C(37)-C(38)-C(39)   | 102.16(19) |
| C(2S)-H(2S2) | 0.9900    | C(37)-C(38)-H(38A)  | 111.3      |
| C(3S)-C(4S)  | 1.501(18) | C(39)-C(38)-H(38A)  | 111.3      |
| C(3S)-H(3S1) | 0.9900    | C(37)-C(38)-H(38B)  | 111.3      |
| C(3S)-H(3S2) | 0.9900    | C(39)-C(38)-H(38B)  | 111.3      |
| C(4S)-C(5S)  | 1.383(19) | H(38A)-C(38)-H(38B) | 109.2      |
| C(4S)-H(4S1) | 0.9900    | C(38)-C(39)-C(40)   | 105.18(18) |
| C(4S)-H(4S2) | 0.9900    | C(38)-C(39)-H(39A)  | 110.7      |
| C(5S)-H(5S1) | 0.9800    | C(40)-C(39)-H(39A)  | 110.7      |
| C(5S)-H(5S2) | 0.9800    | C(38)-C(39)-H(39B)  | 110.7      |
| C(5S)-H(5S3) | 0.9800    | C(40)-C(39)-H(39B)  | 110.7      |
| C(1T)-C(2T)  | 1.432(18) | H(39A)-C(39)-H(39B) | 108.8      |
| C(1T)-H(1T1) | 0.9800    | C(48)-C(40)-C(32)   | 123.21(18) |
| C(1T)-H(1T2) | 0.9800    | C(48)-C(40)-C(39)   | 111.76(17) |
| C(1T)-H(1T3) | 0.9800    | C(32)-C(40)-C(39)   | 100.67(18) |
| C(2T)-C(3T)  | 1.436(18) | C(48)-C(40)-C(41)   | 100.93(19) |
| C(2T)-H(2T1) | 0.9900    | C(32)-C(40)-C(41)   | 110.93(18) |
| C(2T)-H(2T2) | 0.9900    | C(39)-C(40)-C(41)   | 109.14(18) |
| C(3T)-C(4T)  | 1.386(18) | C(42)-C(41)-C(40)   | 105.27(19) |
| C(3T)-H(3T1) | 0.9900    | C(42)-C(41)-H(41A)  | 110.7      |
| C(3T)-H(3T2) | 0.9900    | C(40)-C(41)-H(41A)  | 110.7      |
| C(4T)-C(5T)  | 1.434(18) | C(42)-C(41)-H(41B)  | 110.7      |
| C(4T)-H(4T1) | 0.9900    | C(40)-C(41)-H(41B)  | 110.7      |
| C(4T)-H(4T2) | 0.9900    | H(41A)-C(41)-H(41B) | 108.8      |
| C(5T)-H(5T1) | 0.9800    | C(43)-C(42)-C(41)   | 102.39(19) |
| C(5T)-H(5T2) | 0.9800    | C(43)-C(42)-H(42A)  | 111.3      |
| C(5T)-H(5T3) | 0.9800    | C(41)-C(42)-H(42A)  | 111.3      |
|              |           | C(43)-C(42)-H(42B)  | 111.3      |
|              |           | C(41)-C(42)-H(42B)  | 111.3      |
|              |           | H(42A)-C(42)-H(42B) | 109.2      |
|              |           | C(44)-C(43)-C(48)   | 120.6(2)   |
|              |           | C(44)-C(43)-C(42)   | 128.5(2)   |
|              |           | C(48)-C(43)-C(42)   | 110.9(2)   |
|              |           | C(45)-C(44)-C(43)   | 119.7(2)   |
|              |           | C(45)-C(44)-H(44)   | 120.2      |
|              |           | C(43)-C(44)-H(44)   | 120.2      |
|              |           | C(44)-C(45)-C(46)   | 119.9(3)   |
|              |           | C(44)-C(45)-H(45)   | 120.1      |
|              |           | C(46)-C(45)-H(45)   | 120.1      |
|              |           | C(45)-C(46)-C(47)   | 121.3(2)   |
|              |           | C(45)-C(46)-H(46)   | 119.3      |
|              |           | C(47)-C(46)-H(46)   | 119.3      |

|                     |            |
|---------------------|------------|
| C(48)-C(47)-C(46)   | 118.4(2)   |
| C(48)-C(47)-C(49)   | 121.8(2)   |
| C(46)-C(47)-C(49)   | 119.6(2)   |
| C(47)-C(48)-C(43)   | 120.1(2)   |
| C(47)-C(48)-C(40)   | 130.2(2)   |
| C(43)-C(48)-C(40)   | 109.6(2)   |
| C(47)-C(49)-P(2)    | 108.78(14) |
| C(47)-C(49)-H(49A)  | 109.9      |
| P(2)-C(49)-H(49A)   | 109.9      |
| C(47)-C(49)-H(49B)  | 109.9      |
| P(2)-C(49)-H(49B)   | 109.9      |
| H(49A)-C(49)-H(49B) | 108.3      |
| C(52)-C(51)-C(56)   | 119.01(19) |
| C(52)-C(51)-P(2)    | 123.29(16) |
| C(56)-C(51)-P(2)    | 117.52(16) |
| C(53)-C(52)-C(51)   | 120.4(2)   |
| C(53)-C(52)-H(52)   | 119.8      |
| C(51)-C(52)-H(52)   | 119.8      |
| C(52)-C(53)-C(54)   | 120.1(2)   |
| C(52)-C(53)-H(53)   | 119.9      |
| C(54)-C(53)-H(53)   | 119.9      |
| C(55)-C(54)-C(53)   | 120.0(2)   |
| C(55)-C(54)-H(54)   | 120.0      |
| C(53)-C(54)-H(54)   | 120.0      |
| C(56)-C(55)-C(54)   | 119.9(2)   |
| C(56)-C(55)-H(55)   | 120.1      |
| C(54)-C(55)-H(55)   | 120.1      |
| C(55)-C(56)-C(51)   | 120.6(2)   |
| C(55)-C(56)-H(56)   | 119.7      |
| C(51)-C(56)-H(56)   | 119.7      |
| C(68)-N(1)-C(61)    | 104.91(18) |
| C(68)-N(1)-Cu(1)    | 128.27(14) |
| C(61)-N(1)-Cu(1)    | 125.01(15) |
| C(62)-C(61)-N(1)    | 112.8(2)   |
| C(62)-C(61)-H(61)   | 123.6      |
| N(1)-C(61)-H(61)    | 123.6      |
| C(61)-C(62)-C(63)   | 105.5(2)   |
| C(61)-C(62)-C(69)   | 128.1(2)   |
| C(63)-C(62)-C(69)   | 126.5(2)   |
| C(62)-C(69)-H(69A)  | 109.5      |
| C(62)-C(69)-H(69B)  | 109.5      |
| H(69A)-C(69)-H(69B) | 109.5      |
| C(62)-C(69)-H(69C)  | 109.5      |
| H(69A)-C(69)-H(69C) | 109.5      |
| H(69B)-C(69)-H(69C) | 109.5      |

|                     |            |
|---------------------|------------|
| C(64)-C(63)-C(68)   | 119.7(2)   |
| C(64)-C(63)-C(62)   | 133.8(2)   |
| C(68)-C(63)-C(62)   | 106.47(19) |
| C(65)-C(64)-C(63)   | 119.4(2)   |
| C(65)-C(64)-H(64)   | 120.3      |
| C(63)-C(64)-H(64)   | 120.3      |
| C(64)-C(65)-C(66)   | 120.7(2)   |
| C(64)-C(65)-H(65)   | 119.7      |
| C(66)-C(65)-H(65)   | 119.7      |
| C(67)-C(66)-C(65)   | 121.3(2)   |
| C(67)-C(66)-H(66)   | 119.4      |
| C(65)-C(66)-H(66)   | 119.4      |
| C(66)-C(67)-C(68)   | 118.3(2)   |
| C(66)-C(67)-H(67)   | 120.9      |
| C(68)-C(67)-H(67)   | 120.9      |
| N(1)-C(68)-C(67)    | 129.02(19) |
| N(1)-C(68)-C(63)    | 110.32(18) |
| C(67)-C(68)-C(63)   | 120.65(19) |
| C(2S)-C(1S)-H(1S1)  | 109.5      |
| C(2S)-C(1S)-H(1S2)  | 109.5      |
| H(1S1)-C(1S)-H(1S2) | 109.5      |
| C(2S)-C(1S)-H(1S3)  | 109.5      |
| H(1S1)-C(1S)-H(1S3) | 109.5      |
| H(1S2)-C(1S)-H(1S3) | 109.5      |
| C(1S)-C(2S)-C(3S)   | 120.5(18)  |
| C(1S)-C(2S)-H(2S1)  | 107.2      |
| C(3S)-C(2S)-H(2S1)  | 107.2      |
| C(1S)-C(2S)-H(2S2)  | 107.2      |
| C(3S)-C(2S)-H(2S2)  | 107.2      |
| H(2S1)-C(2S)-H(2S2) | 106.8      |
| C(2S)-C(3S)-C(4S)   | 117.2(14)  |
| C(2S)-C(3S)-H(3S1)  | 108.0      |
| C(4S)-C(3S)-H(3S1)  | 108.0      |
| C(2S)-C(3S)-H(3S2)  | 108.0      |
| C(4S)-C(3S)-H(3S2)  | 108.0      |
| H(3S1)-C(3S)-H(3S2) | 107.2      |
| C(5S)-C(4S)-C(3S)   | 124(2)     |
| C(5S)-C(4S)-H(4S1)  | 106.3      |
| C(3S)-C(4S)-H(4S1)  | 106.3      |
| C(5S)-C(4S)-H(4S2)  | 106.3      |
| C(3S)-C(4S)-H(4S2)  | 106.3      |
| H(4S1)-C(4S)-H(4S2) | 106.4      |
| C(4S)-C(5S)-H(5S1)  | 109.5      |
| C(4S)-C(5S)-H(5S2)  | 109.5      |
| H(5S1)-C(5S)-H(5S2) | 109.5      |



|                     |           |
|---------------------|-----------|
| C(4S)-C(5S)-H(5S3)  | 109.5     |
| H(5S1)-C(5S)-H(5S3) | 109.5     |
| H(5S2)-C(5S)-H(5S3) | 109.5     |
| C(2T)-C(1T)-H(1T1)  | 109.5     |
| C(2T)-C(1T)-H(1T2)  | 109.5     |
| H(1T1)-C(1T)-H(1T2) | 109.5     |
| C(2T)-C(1T)-H(1T3)  | 109.5     |
| H(1T1)-C(1T)-H(1T3) | 109.5     |
| H(1T2)-C(1T)-H(1T3) | 109.5     |
| C(1T)-C(2T)-C(3T)   | 123.2(17) |
| C(1T)-C(2T)-H(2T1)  | 106.5     |
| C(3T)-C(2T)-H(2T1)  | 106.5     |
| C(1T)-C(2T)-H(2T2)  | 106.5     |
| C(3T)-C(2T)-H(2T2)  | 106.5     |
| H(2T1)-C(2T)-H(2T2) | 106.5     |
| C(4T)-C(3T)-C(2T)   | 134(2)    |
| C(4T)-C(3T)-H(3T1)  | 103.7     |
| C(2T)-C(3T)-H(3T1)  | 103.7     |
| C(4T)-C(3T)-H(3T2)  | 103.7     |
| C(2T)-C(3T)-H(3T2)  | 103.7     |
| H(3T1)-C(3T)-H(3T2) | 105.4     |
| C(3T)-C(4T)-C(5T)   | 125(2)    |
| C(3T)-C(4T)-H(4T1)  | 106.1     |
| C(5T)-C(4T)-H(4T1)  | 106.1     |
| C(3T)-C(4T)-H(4T2)  | 106.1     |
| C(5T)-C(4T)-H(4T2)  | 106.1     |
| H(4T1)-C(4T)-H(4T2) | 106.3     |
| C(4T)-C(5T)-H(5T1)  | 109.5     |
| C(4T)-C(5T)-H(5T2)  | 109.5     |
| H(5T1)-C(5T)-H(5T2) | 109.5     |
| C(4T)-C(5T)-H(5T3)  | 109.5     |
| H(5T1)-C(5T)-H(5T3) | 109.5     |
| H(5T2)-C(5T)-H(5T3) | 109.5     |

**Table S-4.** Anisotropic displacement parameters ( $\text{\AA}^2 \times 10^3$ ) for crystal\_02. The anisotropic displacement factor exponent takes the form:  $-2\pi^2[h^2 a^{*2}U^{11} + \dots + 2 h k a^* b^* U^{12}]$ .

|       | U <sup>11</sup> | U <sup>22</sup> | U <sup>33</sup> | U <sup>23</sup> | U <sup>13</sup> | U <sup>12</sup> |
|-------|-----------------|-----------------|-----------------|-----------------|-----------------|-----------------|
| Cu(1) | 13(1)           | 14(1)           | 12(1)           | 1(1)            | 0(1)            | 1(1)            |
| P(1)  | 12(1)           | 14(1)           | 13(1)           | 2(1)            | 0(1)            | 2(1)            |
| C(1)  | 15(1)           | 15(1)           | 13(1)           | 2(1)            | 1(1)            | 2(1)            |
| C(2)  | 14(1)           | 17(1)           | 12(1)           | 2(1)            | 1(1)            | 5(1)            |
| C(3)  | 14(1)           | 18(1)           | 12(1)           | 4(1)            | 3(1)            | 4(1)            |
| C(4)  | 15(1)           | 25(1)           | 18(1)           | 3(1)            | 4(1)            | 2(1)            |
| C(5)  | 14(1)           | 31(1)           | 20(1)           | 5(1)            | 4(1)            | 8(1)            |
| C(6)  | 19(1)           | 26(1)           | 17(1)           | 3(1)            | 5(1)            | 12(1)           |
| C(7)  | 19(1)           | 18(1)           | 14(1)           | 2(1)            | 2(1)            | 7(1)            |
| C(8)  | 22(1)           | 16(1)           | 21(1)           | 2(1)            | 3(1)            | 7(1)            |
| C(9)  | 20(1)           | 14(1)           | 21(1)           | 1(1)            | 4(1)            | 3(1)            |
| C(10) | 13(1)           | 14(1)           | 14(1)           | 0(1)            | 2(1)            | 3(1)            |
| C(11) | 17(1)           | 21(1)           | 16(1)           | -1(1)           | -1(1)           | 4(1)            |
| C(12) | 18(1)           | 28(1)           | 22(1)           | -5(1)           | -3(1)           | 5(1)            |
| C(13) | 12(1)           | 15(1)           | 20(1)           | 0(1)            | -1(1)           | 2(1)            |
| C(14) | 13(1)           | 15(1)           | 29(1)           | 2(1)            | 1(1)            | 3(1)            |
| C(15) | 13(1)           | 15(1)           | 30(1)           | 1(1)            | 6(1)            | 4(1)            |
| C(16) | 15(1)           | 14(1)           | 21(1)           | -1(1)           | 7(1)            | 1(1)            |
| C(17) | 12(1)           | 12(1)           | 18(1)           | 3(1)            | 4(1)            | 1(1)            |
| C(18) | 12(1)           | 12(1)           | 17(1)           | 2(1)            | 2(1)            | 3(1)            |
| C(19) | 15(1)           | 15(1)           | 14(1)           | 2(1)            | 2(1)            | 1(1)            |
| C(21) | 14(1)           | 20(1)           | 15(1)           | -3(1)           | -2(1)           | 5(1)            |
| C(22) | 21(1)           | 22(1)           | 26(1)           | 1(1)            | -7(1)           | 4(1)            |
| C(23) | 26(1)           | 29(1)           | 38(2)           | -1(1)           | -14(1)          | 10(1)           |
| C(24) | 18(1)           | 37(2)           | 42(2)           | -13(1)          | -14(1)          | 6(1)            |
| C(25) | 20(1)           | 30(1)           | 38(2)           | -9(1)           | -4(1)           | -4(1)           |
| C(26) | 19(1)           | 23(1)           | 26(1)           | 0(1)            | -4(1)           | -1(1)           |
| P(2)  | 12(1)           | 11(1)           | 13(1)           | 0(1)            | 1(1)            | 0(1)            |
| C(31) | 16(1)           | 12(1)           | 16(1)           | -4(1)           | 2(1)            | -2(1)           |
| C(32) | 17(1)           | 14(1)           | 17(1)           | -4(1)           | 6(1)            | -4(1)           |
| C(33) | 17(1)           | 14(1)           | 16(1)           | -2(1)           | 6(1)            | -4(1)           |
| C(34) | 23(1)           | 20(1)           | 16(1)           | -2(1)           | 4(1)            | -9(1)           |
| C(35) | 34(1)           | 31(1)           | 13(1)           | 1(1)            | 1(1)            | -11(1)          |
| C(36) | 42(2)           | 27(1)           | 17(1)           | 7(1)            | 5(1)            | -8(1)           |
| C(37) | 27(1)           | 18(1)           | 21(1)           | 0(1)            | 8(1)            | -7(1)           |
| C(38) | 34(1)           | 16(1)           | 29(1)           | 0(1)            | 9(1)            | -8(1)           |
| C(39) | 28(1)           | 13(1)           | 28(1)           | -5(1)           | 6(1)            | -6(1)           |
| C(40) | 15(1)           | 13(1)           | 24(1)           | -6(1)           | 4(1)            | -4(1)           |
| C(41) | 16(1)           | 22(1)           | 34(1)           | -9(1)           | 7(1)            | -4(1)           |
| C(42) | 14(1)           | 30(1)           | 44(2)           | -12(1)          | 2(1)            | -4(1)           |
| C(43) | 16(1)           | 20(1)           | 34(1)           | -9(1)           | -4(1)           | 0(1)            |
| C(44) | 22(1)           | 30(1)           | 39(2)           | -6(1)           | -12(1)          | 0(1)            |

|       |         |         |         |         |        |         |
|-------|---------|---------|---------|---------|--------|---------|
| C(45) | 32(1)   | 36(1)   | 27(1)   | -2(1)   | -13(1) | -3(1)   |
| C(46) | 24(1)   | 27(1)   | 23(1)   | -5(1)   | -3(1)  | -1(1)   |
| C(47) | 18(1)   | 13(1)   | 20(1)   | -5(1)   | 0(1)   | 1(1)    |
| C(48) | 15(1)   | 12(1)   | 24(1)   | -7(1)   | 0(1)   | -1(1)   |
| C(49) | 14(1)   | 12(1)   | 17(1)   | -2(1)   | 3(1)   | 1(1)    |
| C(51) | 13(1)   | 15(1)   | 15(1)   | 1(1)    | 1(1)   | -1(1)   |
| C(52) | 18(1)   | 17(1)   | 20(1)   | 5(1)    | -2(1)  | -1(1)   |
| C(53) | 22(1)   | 25(1)   | 26(1)   | 6(1)    | -5(1)  | 2(1)    |
| C(54) | 15(1)   | 34(1)   | 30(1)   | 3(1)    | -4(1)  | 0(1)    |
| C(55) | 17(1)   | 27(1)   | 27(1)   | 3(1)    | 0(1)   | -6(1)   |
| C(56) | 17(1)   | 17(1)   | 17(1)   | 3(1)    | 0(1)   | -3(1)   |
| N(1)  | 18(1)   | 22(1)   | 14(1)   | 0(1)    | 0(1)   | 6(1)    |
| C(61) | 23(1)   | 31(1)   | 17(1)   | -1(1)   | -2(1)  | 13(1)   |
| C(62) | 18(1)   | 34(1)   | 19(1)   | -3(1)   | -1(1)  | 8(1)    |
| C(69) | 24(1)   | 65(2)   | 26(1)   | -5(1)   | 1(1)   | 19(1)   |
| C(63) | 13(1)   | 26(1)   | 15(1)   | -2(1)   | 0(1)   | -1(1)   |
| C(64) | 16(1)   | 28(1)   | 17(1)   | -1(1)   | 3(1)   | -6(1)   |
| C(65) | 24(1)   | 22(1)   | 15(1)   | 3(1)    | 0(1)   | -7(1)   |
| C(66) | 22(1)   | 18(1)   | 18(1)   | 2(1)    | -4(1)  | -1(1)   |
| C(67) | 17(1)   | 16(1)   | 16(1)   | -2(1)   | 1(1)   | 0(1)    |
| C(68) | 15(1)   | 16(1)   | 12(1)   | -2(1)   | -1(1)  | -1(1)   |
| C(1S) | 100(17) | 34(7)   | 54(9)   | -26(5)  | 15(10) | 13(8)   |
| C(2S) | 104(10) | 35(6)   | 64(7)   | -25(6)  | 40(6)  | 17(6)   |
| C(3S) | 128(10) | 48(7)   | 71(7)   | -6(6)   | 34(6)  | 17(7)   |
| C(4S) | 137(10) | 52(8)   | 61(7)   | 7(6)    | 21(7)  | 8(7)    |
| C(5S) | 137(11) | 42(9)   | 80(12)  | 21(8)   | 17(11) | 8(10)   |
| C(1T) | 105(11) | 78(10)  | 66(10)  | -15(8)  | 28(9)  | 4(7)    |
| C(2T) | 102(9)  | 41(6)   | 56(6)   | 7(5)    | 54(6)  | 23(5)   |
| C(3T) | 132(10) | 49(7)   | 62(7)   | -1(6)   | 38(7)  | 7(7)    |
| C(4T) | 149(11) | 67(8)   | 70(7)   | 6(6)    | 23(8)  | -1(8)   |
| C(5T) | 171(18) | 102(14) | 115(16) | -38(12) | 30(12) | -22(12) |

**Table S-5.** Hydrogen coordinates ( $\times 10^4$ ) and isotropic displacement parameters ( $\text{\AA}^2 \times 10^3$ ) for crystal\_02.

|        | x    | y     | z     | U(eq) |
|--------|------|-------|-------|-------|
| H(1A)  | 1592 | 8156  | 10218 | 17    |
| H(1B)  | 2264 | 8464  | 10304 | 17    |
| H(4)   | 682  | 8784  | 9968  | 23    |
| H(5)   | 189  | 9739  | 10208 | 26    |
| H(6)   | 778  | 10647 | 10380 | 25    |
| H(8A)  | 2146 | 10903 | 11115 | 24    |
| H(8B)  | 1937 | 11092 | 9676  | 24    |
| H(9A)  | 3039 | 10638 | 10024 | 22    |
| H(9B)  | 2665 | 10455 | 8737  | 22    |
| H(11A) | 2765 | 10103 | 12044 | 22    |
| H(11B) | 2667 | 9362  | 12033 | 22    |
| H(12A) | 3783 | 10025 | 11395 | 27    |
| H(12B) | 3731 | 9378  | 12168 | 27    |
| H(14)  | 4495 | 8904  | 10233 | 23    |
| H(15)  | 4412 | 8396  | 8236  | 23    |
| H(16)  | 3493 | 8436  | 7070  | 20    |
| H(19A) | 2493 | 8952  | 6619  | 17    |
| H(19B) | 2158 | 9354  | 7725  | 17    |
| H(22)  | 1261 | 9172  | 6611  | 28    |
| H(23)  | 245  | 9164  | 5827  | 37    |
| H(24)  | -407 | 8326  | 6239  | 39    |
| H(25)  | -28  | 7463  | 7368  | 35    |
| H(26)  | 997  | 7450  | 8082  | 27    |
| H(31A) | 2007 | 7227  | 11102 | 18    |
| H(31B) | 1517 | 6818  | 10322 | 18    |
| H(34)  | 2474 | 6859  | 12980 | 24    |
| H(35)  | 2599 | 6121  | 14590 | 31    |
| H(36)  | 2169 | 5128  | 14341 | 35    |
| H(38A) | 1044 | 4649  | 12781 | 32    |
| H(38B) | 1707 | 4347  | 12423 | 32    |
| H(39A) | 912  | 4568  | 10589 | 28    |
| H(39B) | 1641 | 4650  | 10307 | 28    |
| H(41A) | 362  | 5408  | 11731 | 29    |
| H(41B) | 486  | 6115  | 11306 | 29    |
| H(42A) | -10  | 5138  | 9737  | 35    |
| H(42B) | -219 | 5856  | 9745  | 35    |
| H(44)  | 92   | 5846  | 7138  | 37    |
| H(45)  | 932  | 6044  | 5777  | 38    |
| H(46)  | 1941 | 6041  | 6599  | 30    |
| H(49A) | 2666 | 5739  | 8301  | 18    |
| H(49B) | 2414 | 5597  | 9725  | 18    |

|        |      |      |       |     |
|--------|------|------|-------|-----|
| H(52)  | 3159 | 5834 | 11218 | 22  |
| H(53)  | 4169 | 5775 | 12010 | 29  |
| H(54)  | 4895 | 6539 | 11475 | 32  |
| H(55)  | 4610 | 7360 | 10123 | 28  |
| H(56)  | 3600 | 7420 | 9328  | 21  |
| H(61)  | 3682 | 6678 | 6920  | 28  |
| H(69A) | 4687 | 6640 | 5450  | 57  |
| H(69B) | 4680 | 7078 | 4207  | 57  |
| H(69C) | 4385 | 6398 | 4135  | 57  |
| H(64)  | 3834 | 7587 | 2589  | 24  |
| H(65)  | 3049 | 8239 | 1852  | 25  |
| H(66)  | 2174 | 8437 | 3127  | 23  |
| H(67)  | 2079 | 8003 | 5185  | 20  |
| H(1S1) | 5473 | 5139 | 10289 | 94  |
| H(1S2) | 4762 | 5238 | 9892  | 94  |
| H(1S3) | 5212 | 4841 | 8985  | 94  |
| H(2S1) | 5788 | 5699 | 8608  | 81  |
| H(2S2) | 5341 | 6093 | 9509  | 81  |
| H(3S1) | 5261 | 6224 | 7251  | 99  |
| H(3S2) | 4637 | 6183 | 8069  | 99  |
| H(4S1) | 4999 | 5482 | 6072  | 100 |
| H(4S2) | 4894 | 5041 | 7274  | 100 |
| H(5S1) | 4109 | 5011 | 5960  | 130 |
| H(5S2) | 3898 | 5297 | 7312  | 130 |
| H(5S3) | 4004 | 5742 | 6099  | 130 |
| H(1T1) | 5113 | 6580 | 8666  | 124 |
| H(1T2) | 5617 | 6075 | 8241  | 124 |
| H(1T3) | 5254 | 6467 | 7171  | 124 |
| H(2T1) | 4352 | 6022 | 7798  | 79  |
| H(2T2) | 4712 | 5633 | 8858  | 79  |
| H(3T1) | 5214 | 5219 | 6959  | 97  |
| H(3T2) | 4639 | 4928 | 7673  | 97  |
| H(4T1) | 4838 | 5056 | 5345  | 114 |
| H(4T2) | 4307 | 5543 | 5643  | 114 |
| H(5T1) | 3915 | 4678 | 4817  | 194 |
| H(5T2) | 4206 | 4273 | 5959  | 194 |
| H(5T3) | 3669 | 4765 | 6259  | 194 |

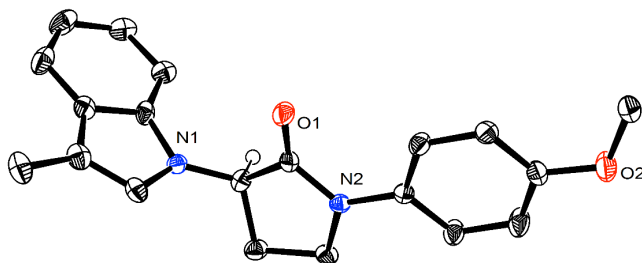

**Figure S-4.** Structure of (3*R*)-1-(4-methoxyphenyl)-3-(3-methyl-1*H*-indol-1-yl)pyrrolidin-2-one. One of two molecules in the asymmetric unit is shown.

**(3*R*)-1-(4-Methoxyphenyl)-3-(3-methyl-1*H*-indol-1-yl)pyrrolidin-2-one** (Table 2, entry 2; synthesized using (*R*)-**L**\*). A suitable crystal for X-ray crystallography was grown by vapor diffusion with Et<sub>2</sub>O and hexane.

A crystal of C<sub>20</sub>H<sub>20</sub>N<sub>2</sub>O<sub>2</sub> was selected and mounted in a nylon loop in immersion oil. All measurements were made on a Bruker Photon diffractometer with filtered Cu-Kα radiation at a temperature of 100 K. Using Olex2,<sup>6</sup> the structure was solved with the ShelXS structure solution program using Direct Methods and refined with the ShelXL refinement package<sup>5</sup> using least squares minimization. The absolute stereochemistry was determined on the basis of the absolute structure parameter.

---

(6) Dolomanov, O. V.; Bourhis, L. J.; Gildea, R. J.; Howard, J. A. K.; Puschmann, H. OLEX2: A Complete Structure Solution, Refinement and Analysis Program. *J. Appl. Crystallogr.* **2009**, *42*, 339–341.

**Table S-6.** Crystal data and structure refinement for crystal\_03.

|                                   |                                                                                             |
|-----------------------------------|---------------------------------------------------------------------------------------------|
| Identification code               | crystal_03                                                                                  |
| Empirical formula                 | C <sub>20</sub> H <sub>20</sub> N <sub>2</sub> O <sub>2</sub>                               |
| Formula weight                    | 320.38                                                                                      |
| Temperature                       | 100 K                                                                                       |
| Wavelength                        | 1.54178 Å                                                                                   |
| Crystal system                    | Orthorhombic                                                                                |
| Space group                       | P2 <sub>1</sub> 2 <sub>1</sub> 2 <sub>1</sub>                                               |
| Unit cell dimensions              | a = 8.0191(4) Å    α = 90°.<br>b = 11.0299(6) Å    β = 90°<br>c = 36.6492(19) Å    γ = 90°. |
| Volume                            | 3241.6(3) Å <sup>3</sup>                                                                    |
| Z                                 | 8                                                                                           |
| Density (calculated)              | 1.313 Mg/m <sup>3</sup>                                                                     |
| Absorption coefficient            | 0.682 mm <sup>-1</sup>                                                                      |
| F(000)                            | 1360                                                                                        |
| Crystal size                      | 0.20 × 0.15 × 0.05 mm <sup>3</sup>                                                          |
| Theta range for data collection   | 2.411 to 74.548°.                                                                           |
| Index ranges                      | -9 ≤ h ≤ 10, -6 ≤ k ≤ 13, -44 ≤ l ≤ 45                                                      |
| Reflections collected             | 22350                                                                                       |
| Independent reflections           | 6493 [R(int) = 0.0655]                                                                      |
| Completeness to theta = 67.679°   | 99.5 %                                                                                      |
| Absorption correction             | Semi-empirical from equivalents                                                             |
| Max. and min. transmission        | 0.7468 and 0.6802                                                                           |
| Refinement method                 | Full-matrix least-squares on F <sup>2</sup>                                                 |
| Data / restraints / parameters    | 6493 / 0 / 437                                                                              |
| Goodness-of-fit on F <sup>2</sup> | 1.036                                                                                       |
| Final R indices [I > 2σ(I)]       | R1 = 0.0573, wR2 = 0.1417                                                                   |
| R indices (all data)              | R1 = 0.0708, wR2 = 0.1507                                                                   |
| Absolute structure parameter      | 0.0(2)                                                                                      |
| Largest diff. peak and hole       | 0.551 and -0.209 e/Å <sup>-3</sup>                                                          |

**Table S-7.** Atomic coordinates ( $\times 10^4$ ) and equivalent isotropic displacement parameters ( $\text{\AA}^2 \times 10^3$ ) for crystal\_03.  $U(\text{eq})$  is defined as one-third of the trace of the orthogonalized  $U^{ij}$  tensor.

|       | x         | y        | z        | U(eq) |
|-------|-----------|----------|----------|-------|
| O(1)  | -8642(4)  | -192(3)  | 761(1)   | 28(1) |
| O(2)  | -6222(4)  | -1004(3) | -928(1)  | 31(1) |
| N(1)  | -7939(4)  | -930(3)  | 1497(1)  | 19(1) |
| N(2)  | -6330(4)  | -1317(3) | 596(1)   | 16(1) |
| C(1)  | -7547(5)  | -919(3)  | 827(1)   | 19(1) |
| C(2)  | -7354(5)  | -1606(3) | 1190(1)  | 21(1) |
| C(3)  | -5534(5)  | -1993(3) | 1187(1)  | 23(1) |
| C(4)  | -5151(5)  | -2143(3) | 779(1)   | 20(1) |
| C(5)  | -6325(4)  | -1182(3) | 210(1)   | 17(1) |
| C(6)  | -7379(5)  | -379(3)  | 30(1)    | 21(1) |
| C(7)  | -7394(5)  | -305(3)  | -348(1)  | 21(1) |
| C(8)  | -6316(5)  | -1019(3) | -554(1)  | 22(1) |
| C(9)  | -5245(6)  | -1803(4) | -377(1)  | 32(1) |
| C(10) | -5236(5)  | -1888(4) | 3(1)     | 26(1) |
| C(11) | -7412(5)  | -278(3)  | -1120(1) | 25(1) |
| C(12) | -7261(5)  | 135(3)   | 1639(1)  | 24(1) |
| C(13) | -8255(5)  | 623(3)   | 1902(1)  | 25(1) |
| C(14) | -9646(5)  | -174(3)  | 1933(1)  | 22(1) |
| C(15) | -11071(6) | -171(4)  | 2160(1)  | 31(1) |
| C(16) | -12234(6) | -1073(4) | 2120(1)  | 34(1) |
| C(17) | -12022(5) | -1988(4) | 1857(1)  | 28(1) |
| C(18) | -10658(5) | -2009(3) | 1630(1)  | 25(1) |
| C(19) | -9448(5)  | -1103(3) | 1675(1)  | 21(1) |
| C(20) | -7997(6)  | 1767(4)  | 2106(1)  | 30(1) |
| O(3)  | -6409(5)  | -4912(3) | 740(1)   | 40(1) |
| O(4)  | -8515(4)  | -5985(3) | -963(1)  | 31(1) |
| N(3)  | -6663(5)  | -6007(3) | 1452(1)  | 29(1) |
| N(4)  | -8293(4)  | -6376(3) | 558(1)   | 18(1) |
| C(21) | -7437(5)  | -5692(3) | 804(1)   | 24(1) |
| C(22) | -8009(5)  | -6069(4) | 1186(1)  | 29(1) |
| C(23) | -8756(6)  | -7305(4) | 1127(1)  | 34(1) |
| C(24) | -9402(5)  | -7259(3) | 739(1)   | 23(1) |
| C(25) | -8298(5)  | -6238(3) | 172(1)   | 19(1) |
| C(26) | -7203(5)  | -5477(3) | -9(1)    | 21(1) |
| C(27) | -7229(5)  | -5372(3) | -388(1)  | 21(1) |
| C(28) | -8380(5)  | -6028(3) | -591(1)  | 21(1) |
| C(29) | -9476(6)  | -6788(4) | -410(1)  | 29(1) |
| C(30) | -9447(5)  | -6897(3) | -33(1)   | 25(1) |
| C(31) | -7280(5)  | -5296(3) | -1153(1) | 25(1) |
| C(32) | -5229(6)  | -6750(4) | 1462(1)  | 30(1) |
| C(33) | -4247(6)  | -6392(4) | 1739(1)  | 32(1) |



|       |          |          |         |       |
|-------|----------|----------|---------|-------|
| C(34) | -5035(5) | -5362(3) | 1915(1) | 22(1) |
| C(35) | -4596(6) | -4634(4) | 2203(1) | 35(1) |
| C(36) | -5649(7) | -3663(5) | 2291(1) | 39(1) |
| C(37) | -7096(6) | -3460(4) | 2100(1) | 35(1) |
| C(38) | -7591(5) | -4233(4) | 1810(1) | 28(1) |
| C(39) | -6546(6) | -5165(4) | 1720(1) | 28(1) |
| C(40) | -2603(6) | -6929(4) | 1847(1) | 37(1) |

**Table S-8.** Bond lengths [Å] and angles [°] for crystal\_03.

| Bond length [Å] |          | Bond angle [°]    |          |
|-----------------|----------|-------------------|----------|
| O(1)-C(1)       | 1.213(5) | C(8)-O(2)-C(11)   | 117.4(3) |
| O(2)-C(8)       | 1.374(5) | C(12)-N(1)-C(2)   | 127.2(3) |
| O(2)-C(11)      | 1.431(5) | C(19)-N(1)-C(2)   | 125.7(3) |
| N(1)-C(2)       | 1.428(5) | C(19)-N(1)-C(12)  | 106.3(3) |
| N(1)-C(12)      | 1.394(5) | C(1)-N(2)-C(4)    | 112.0(3) |
| N(1)-C(19)      | 1.387(5) | C(1)-N(2)-C(5)    | 125.9(3) |
| N(2)-C(1)       | 1.364(5) | C(5)-N(2)-C(4)    | 121.0(3) |
| N(2)-C(4)       | 1.476(4) | O(1)-C(1)-N(2)    | 127.3(4) |
| N(2)-C(5)       | 1.420(5) | O(1)-C(1)-C(2)    | 124.7(3) |
| C(1)-C(2)       | 1.541(5) | N(2)-C(1)-C(2)    | 107.9(3) |
| C(2)-C(3)       | 1.521(5) | N(1)-C(2)-C(1)    | 113.0(3) |
| C(3)-C(4)       | 1.535(5) | N(1)-C(2)-C(3)    | 118.0(3) |
| C(5)-C(6)       | 1.391(5) | C(3)-C(2)-C(1)    | 103.1(3) |
| C(5)-C(10)      | 1.396(5) | C(2)-C(3)-C(4)    | 103.4(3) |
| C(6)-C(7)       | 1.388(5) | N(2)-C(4)-C(3)    | 104.4(3) |
| C(7)-C(8)       | 1.391(5) | C(6)-C(5)-N(2)    | 122.4(3) |
| C(8)-C(9)       | 1.381(6) | C(6)-C(5)-C(10)   | 118.5(4) |
| C(9)-C(10)      | 1.394(6) | C(10)-C(5)-N(2)   | 119.1(3) |
| C(12)-C(13)     | 1.361(6) | C(7)-C(6)-C(5)    | 121.1(3) |
| C(13)-C(14)     | 1.425(6) | C(6)-C(7)-C(8)    | 120.2(3) |
| C(13)-C(20)     | 1.483(6) | O(2)-C(8)-C(7)    | 124.7(4) |
| C(14)-C(15)     | 1.412(6) | O(2)-C(8)-C(9)    | 116.2(4) |
| C(14)-C(19)     | 1.404(5) | C(9)-C(8)-C(7)    | 119.1(4) |
| C(15)-C(16)     | 1.371(7) | C(8)-C(9)-C(10)   | 120.9(4) |
| C(16)-C(17)     | 1.407(7) | C(9)-C(10)-C(5)   | 120.2(4) |
| C(17)-C(18)     | 1.372(6) | C(13)-C(12)-N(1)  | 111.6(4) |
| C(18)-C(19)     | 1.403(6) | C(12)-C(13)-C(14) | 105.8(3) |
| O(3)-C(21)      | 1.215(5) | C(12)-C(13)-C(20) | 127.8(4) |
| O(4)-C(28)      | 1.371(5) | C(14)-C(13)-C(20) | 126.4(4) |
| O(4)-C(31)      | 1.428(5) | C(15)-C(14)-C(13) | 132.8(4) |
| N(3)-C(22)      | 1.457(5) | C(19)-C(14)-C(13) | 107.9(4) |
| N(3)-C(32)      | 1.413(6) | C(19)-C(14)-C(15) | 119.3(4) |
| N(3)-C(39)      | 1.355(6) | C(16)-C(15)-C(14) | 119.1(4) |
| N(4)-C(21)      | 1.359(5) | C(15)-C(16)-C(17) | 120.7(4) |
| N(4)-C(24)      | 1.476(4) | C(18)-C(17)-C(16) | 121.6(4) |
| N(4)-C(25)      | 1.423(5) | C(17)-C(18)-C(19) | 118.0(4) |
| C(21)-C(22)     | 1.531(6) | N(1)-C(19)-C(14)  | 108.4(3) |
| C(22)-C(23)     | 1.505(6) | N(1)-C(19)-C(18)  | 130.4(4) |
| C(23)-C(24)     | 1.514(6) | C(18)-C(19)-C(14) | 121.3(4) |
| C(25)-C(26)     | 1.383(5) | C(28)-O(4)-C(31)  | 116.6(3) |
| C(25)-C(30)     | 1.395(5) | C(32)-N(3)-C(22)  | 126.4(4) |
| C(26)-C(27)     | 1.396(6) | C(39)-N(3)-C(22)  | 124.7(4) |

|             |          |                   |          |
|-------------|----------|-------------------|----------|
| C(27)-C(28) | 1.388(5) | C(39)-N(3)-C(32)  | 108.8(4) |
| C(28)-C(29) | 1.384(5) | C(21)-N(4)-C(24)  | 112.0(3) |
| C(29)-C(30) | 1.387(6) | C(21)-N(4)-C(25)  | 126.9(3) |
| C(32)-C(33) | 1.343(7) | C(25)-N(4)-C(24)  | 120.9(3) |
| C(33)-C(34) | 1.451(6) | O(3)-C(21)-N(4)   | 127.4(4) |
| C(33)-C(40) | 1.499(6) | O(3)-C(21)-C(22)  | 124.9(4) |
| C(34)-C(35) | 1.373(6) | N(4)-C(21)-C(22)  | 107.6(3) |
| C(34)-C(39) | 1.423(6) | N(3)-C(22)-C(21)  | 112.2(3) |
| C(35)-C(36) | 1.401(7) | N(3)-C(22)-C(23)  | 115.7(4) |
| C(36)-C(37) | 1.373(7) | C(23)-C(22)-C(21) | 103.5(4) |
| C(37)-C(38) | 1.420(7) | C(22)-C(23)-C(24) | 103.9(3) |
| C(38)-C(39) | 1.366(6) | N(4)-C(24)-C(23)  | 103.7(3) |
|             |          | C(26)-C(25)-N(4)  | 122.7(3) |
|             |          | C(26)-C(25)-C(30) | 118.5(4) |
|             |          | C(30)-C(25)-N(4)  | 118.9(3) |
|             |          | C(25)-C(26)-C(27) | 121.3(4) |
|             |          | C(28)-C(27)-C(26) | 119.9(3) |
|             |          | O(4)-C(28)-C(27)  | 124.6(4) |
|             |          | O(4)-C(28)-C(29)  | 116.6(3) |
|             |          | C(29)-C(28)-C(27) | 118.8(4) |
|             |          | C(28)-C(29)-C(30) | 121.3(4) |
|             |          | C(29)-C(30)-C(25) | 120.2(4) |
|             |          | C(33)-C(32)-N(3)  | 109.1(4) |
|             |          | C(32)-C(33)-C(34) | 108.1(4) |
|             |          | C(32)-C(33)-C(40) | 126.8(4) |
|             |          | C(34)-C(33)-C(40) | 125.1(4) |
|             |          | C(35)-C(34)-C(33) | 133.5(4) |
|             |          | C(35)-C(34)-C(39) | 121.0(4) |
|             |          | C(39)-C(34)-C(33) | 105.5(4) |
|             |          | C(34)-C(35)-C(36) | 117.9(4) |
|             |          | C(37)-C(36)-C(35) | 121.2(4) |
|             |          | C(36)-C(37)-C(38) | 121.3(4) |
|             |          | C(39)-C(38)-C(37) | 117.4(4) |
|             |          | N(3)-C(39)-C(34)  | 108.5(4) |
|             |          | N(3)-C(39)-C(38)  | 130.3(4) |
|             |          | C(38)-C(39)-C(34) | 121.1(4) |

**Table S-9.** Anisotropic displacement parameters ( $\text{\AA}^2 \times 10^3$ ) for crystal\_03. The anisotropic displacement factor exponent takes the form:  $-2\pi^2[h^2 a^{*2}U^{11} + \dots + 2 h k a^* b^* U^{12}]$ .

|       | U <sup>11</sup> | U <sup>22</sup> | U <sup>33</sup> | U <sup>23</sup> | U <sup>13</sup> | U <sup>12</sup> |
|-------|-----------------|-----------------|-----------------|-----------------|-----------------|-----------------|
| O(1)  | 28(1)           | 37(2)           | 21(2)           | -2(1)           | -1(1)           | 16(1)           |
| O(2)  | 39(2)           | 38(2)           | 17(2)           | -1(1)           | 0(1)            | 13(1)           |
| N(1)  | 17(1)           | 22(2)           | 17(2)           | 2(1)            | 1(1)            | 1(1)            |
| N(2)  | 15(1)           | 16(1)           | 18(2)           | 2(1)            | -1(1)           | 1(1)            |
| C(1)  | 20(2)           | 21(2)           | 18(2)           | -3(1)           | -1(2)           | 2(1)            |
| C(2)  | 22(2)           | 20(2)           | 20(2)           | 0(1)            | 4(2)            | 0(1)            |
| C(3)  | 20(2)           | 26(2)           | 24(2)           | 5(2)            | 1(2)            | 2(2)            |
| C(4)  | 20(2)           | 19(2)           | 22(2)           | 3(1)            | -4(2)           | 5(1)            |
| C(5)  | 17(2)           | 15(2)           | 18(2)           | 0(1)            | 0(1)            | -2(1)           |
| C(6)  | 22(2)           | 22(2)           | 20(2)           | 0(1)            | 3(2)            | 5(2)            |
| C(7)  | 21(2)           | 21(2)           | 20(2)           | 5(1)            | -1(2)           | 4(2)            |
| C(8)  | 25(2)           | 23(2)           | 17(2)           | -1(2)           | -2(2)           | -3(2)           |
| C(9)  | 39(2)           | 34(2)           | 21(2)           | -4(2)           | 3(2)            | 18(2)           |
| C(10) | 30(2)           | 30(2)           | 19(2)           | -1(2)           | 1(2)            | 12(2)           |
| C(11) | 28(2)           | 28(2)           | 19(2)           | 0(2)            | -1(2)           | 0(2)            |
| C(12) | 28(2)           | 23(2)           | 20(2)           | 0(1)            | -5(2)           | 0(2)            |
| C(13) | 32(2)           | 22(2)           | 22(2)           | 4(2)            | -4(2)           | 3(2)            |
| C(14) | 28(2)           | 24(2)           | 15(2)           | 6(1)            | -2(2)           | 6(2)            |
| C(15) | 38(2)           | 35(2)           | 21(2)           | 5(2)            | 7(2)            | 15(2)           |
| C(16) | 31(2)           | 42(2)           | 29(2)           | 13(2)           | 13(2)           | 9(2)            |
| C(17) | 24(2)           | 27(2)           | 32(2)           | 11(2)           | 1(2)            | 0(2)            |
| C(18) | 25(2)           | 23(2)           | 26(2)           | 7(2)            | 0(2)            | 3(2)            |
| C(19) | 28(2)           | 22(2)           | 14(2)           | 3(1)            | 1(2)            | 5(2)            |
| C(20) | 44(3)           | 25(2)           | 22(2)           | -1(2)           | -6(2)           | 1(2)            |
| O(3)  | 50(2)           | 42(2)           | 28(2)           | 12(1)           | -13(2)          | -29(2)          |
| O(4)  | 34(2)           | 38(2)           | 21(2)           | -1(1)           | 2(1)            | -12(1)          |
| N(3)  | 28(2)           | 32(2)           | 26(2)           | 3(2)            | -3(2)           | -2(1)           |
| N(4)  | 17(2)           | 15(1)           | 23(2)           | 3(1)            | 3(1)            | -1(1)           |
| C(21) | 24(2)           | 28(2)           | 22(2)           | 9(2)            | -6(2)           | -4(2)           |
| C(22) | 26(2)           | 35(2)           | 25(2)           | 6(2)            | -5(2)           | -8(2)           |
| C(23) | 37(2)           | 37(2)           | 29(2)           | 13(2)           | 4(2)            | -11(2)          |
| C(24) | 23(2)           | 23(2)           | 23(2)           | 3(2)            | 5(2)            | -4(2)           |
| C(25) | 21(2)           | 15(2)           | 21(2)           | 2(1)            | -1(2)           | 4(1)            |
| C(26) | 16(2)           | 19(2)           | 27(2)           | 5(1)            | -3(2)           | 0(1)            |
| C(27) | 18(2)           | 20(2)           | 24(2)           | 4(1)            | 1(2)            | 0(1)            |
| C(28) | 22(2)           | 21(2)           | 20(2)           | -1(2)           | 0(2)            | 3(2)            |
| C(29) | 33(2)           | 30(2)           | 23(2)           | -6(2)           | 2(2)            | -13(2)          |
| C(30) | 25(2)           | 23(2)           | 26(2)           | -1(2)           | 4(2)            | -8(2)           |
| C(31) | 23(2)           | 27(2)           | 24(2)           | 5(2)            | 1(2)            | 0(2)            |
| C(32) | 40(2)           | 24(2)           | 27(2)           | -1(2)           | 7(2)            | 1(2)            |
| C(33) | 30(2)           | 35(2)           | 32(2)           | 6(2)            | 4(2)            | 0(2)            |
| C(34) | 18(2)           | 28(2)           | 19(2)           | 8(2)            | 2(1)            | -3(1)           |

|       |       |       |       |       |       |        |
|-------|-------|-------|-------|-------|-------|--------|
| C(35) | 32(2) | 40(2) | 33(3) | 1(2)  | 0(2)  | -6(2)  |
| C(36) | 42(3) | 49(3) | 26(2) | -5(2) | 3(2)  | -15(2) |
| C(37) | 42(3) | 31(2) | 33(3) | 2(2)  | 13(2) | 0(2)   |
| C(38) | 24(2) | 32(2) | 27(2) | 9(2)  | 0(2)  | -2(2)  |
| C(39) | 31(2) | 30(2) | 23(2) | 6(2)  | 5(2)  | -2(2)  |
| C(40) | 27(2) | 43(2) | 41(3) | 17(2) | 6(2)  | 4(2)   |

**Table S–10.** Hydrogen coordinates ( $\times 10^4$ ) and isotropic displacement parameters ( $\text{\AA}^2 \times 10^3$ ) for crystal\_03.

|        | x      | y     | z     | U(eq) |
|--------|--------|-------|-------|-------|
| H(2)   | -8046  | -2358 | 1174  | 25    |
| H(3A)  | -5377  | -2767 | 1319  | 28    |
| H(3B)  | -4813  | -1365 | 1298  | 28    |
| H(4A)  | -3983  | -1913 | 725   | 24    |
| H(4B)  | -5333  | -2992 | 700   | 24    |
| H(6)   | -8101  | 126   | 168   | 26    |
| H(7)   | -8141  | 235   | -466  | 25    |
| H(9)   | -4504  | -2291 | -516  | 38    |
| H(10)  | -4486  | -2428 | 120   | 32    |
| H(11A) | -7279  | -402  | -1383 | 38    |
| H(11B) | -7231  | 579   | -1062 | 38    |
| H(11C) | -8542  | -514  | -1047 | 38    |
| H(12)  | -6234  | 477   | 1561  | 28    |
| H(15)  | -11221 | 448   | 2337  | 38    |
| H(16)  | -13193 | -1080 | 2272  | 41    |
| H(17)  | -12842 | -2605 | 1835  | 33    |
| H(18)  | -10538 | -2619 | 1449  | 30    |
| H(20A) | -8794  | 2378  | 2021  | 45    |
| H(20B) | -6858  | 2060  | 2066  | 45    |
| H(20C) | -8168  | 1620  | 2367  | 45    |
| H(22)  | -8917  | -5506 | 1265  | 34    |
| H(23A) | -9675  | -7458 | 1301  | 41    |
| H(23B) | -7903  | -7947 | 1155  | 41    |
| H(24A) | -9323  | -8065 | 621   | 28    |
| H(24B) | -10576 | -6983 | 732   | 28    |
| H(26)  | -6419  | -5018 | 128   | 25    |
| H(27)  | -6459  | -4852 | -508  | 25    |
| H(29)  | -10263 | -7244 | -547  | 34    |
| H(30)  | -10213 | -7423 | 86    | 30    |
| H(31A) | -7499  | -5328 | -1416 | 37    |
| H(31B) | -6173  | -5634 | -1102 | 37    |
| H(31C) | -7319  | -4451 | -1070 | 37    |
| H(32)  | -4996  | -7398 | 1300  | 36    |
| H(35)  | -3608  | -4784 | 2339  | 42    |
| H(36)  | -5356  | -3136 | 2485  | 47    |
| H(37)  | -7780  | -2790 | 2164  | 42    |
| H(38)  | -8609  | -4107 | 1683  | 33    |
| H(40A) | -1748  | -6293 | 1848  | 56    |
| H(40B) | -2291  | -7562 | 1673  | 56    |
| H(40C) | -2694  | -7282 | 2092  | 56    |

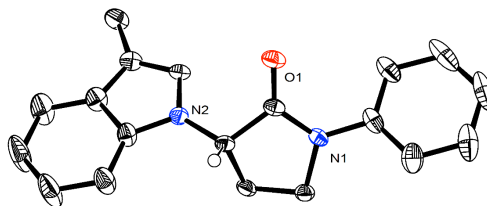

**Figure S-5.** Structure of (3*S*)-3-(3-methyl-1*H*-indol-1-yl)-1-phenylpyrrolidin-2-one. The more-ordered of two molecules in the asymmetric unit is shown.

**(3*S*)-3-(3-Methyl-1*H*-indol-1-yl)-1-phenylpyrrolidin-2-one (Table 2, entry 1; synthesized using (S)-L\*).** A suitable crystal for X-ray crystallography was grown by vapor diffusion with Et<sub>2</sub>O and hexane.

A crystal of C<sub>19</sub>H<sub>18</sub>N<sub>2</sub>O was selected and mounted in a nylon loop in immersion oil. All measurements were made on a Bruker Photon diffractometer with filtered Cu-Kα radiation at a temperature of 100 K. Using Olex2,<sup>6</sup> the structure was solved with the ShelXS structure solution program using Direct Methods and refined with the ShelXL refinement package<sup>5</sup> using least squares minimization. All disordered atoms were refined with the help of similarity restraints on the 1,2- and 1,3-distances and displacement parameters as well as rigid bond restraints for anisotropic displacement parameters. The absolute stereochemistry was determined on the basis of the absolute structure parameter.

**Table S-11.** Crystal data and structure refinement for crystal\_04.

|                                   |                                                                                                |
|-----------------------------------|------------------------------------------------------------------------------------------------|
| Identification code               | crystal_04                                                                                     |
| Empirical formula                 | C <sub>19</sub> H <sub>18</sub> N <sub>2</sub> O                                               |
| Formula weight                    | 290.35                                                                                         |
| Temperature                       | 100.15 K                                                                                       |
| Wavelength                        | 1.54178 Å                                                                                      |
| Crystal system                    | Orthorhombic                                                                                   |
| Space group                       | P2 <sub>1</sub> 2 <sub>1</sub> 2 <sub>1</sub>                                                  |
| Unit cell dimensions              | a = 6.4841(3) Å     α = 90°.<br>b = 21.5067(11) Å    β = 90°.<br>c = 22.0917(12) Å    γ = 90°. |
| Volume                            | 3080.7(3) Å <sup>3</sup>                                                                       |
| Z                                 | 8                                                                                              |
| Density (calculated)              | 1.252 Mg/m <sup>3</sup>                                                                        |
| Absorption coefficient            | 0.615 mm <sup>-1</sup>                                                                         |
| F(000)                            | 1232                                                                                           |
| Crystal size                      | 0.4 x 0.1 x 0.05 mm <sup>3</sup>                                                               |
| Theta range for data collection   | 2.867 to 79.181°.                                                                              |
| Index ranges                      | -7 ≤ h ≤ 7, -19 ≤ k ≤ 27, -23 ≤ l ≤ 27                                                         |
| Reflections collected             | 19550                                                                                          |
| Independent reflections           | 6052 [R(int) = 0.0668]                                                                         |
| Completeness to theta = 67.679°   | 99.5 %                                                                                         |
| Absorption correction             | Semi-empirical from equivalents                                                                |
| Max. and min. transmission        | 0.7542 and 0.5932                                                                              |
| Refinement method                 | Full-matrix least-squares on F <sup>2</sup>                                                    |
| Data / restraints / parameters    | 6052 / 381 / 491                                                                               |
| Goodness-of-fit on F <sup>2</sup> | 1.050                                                                                          |
| Final R indices [I > 2σ(I)]       | R1 = 0.0596, wR2 = 0.1386                                                                      |
| R indices (all data)              | R1 = 0.0709, wR2 = 0.1452                                                                      |
| Absolute structure parameter      | 0.08(18)                                                                                       |
| Largest diff. peak and hole       | 0.200 and -0.273 e/Å <sup>-3</sup>                                                             |



**Table S-12.** Atomic coordinates ( $\times 10^4$ ) and equivalent isotropic displacement parameters ( $\text{\AA}^2 \times 10^3$ ) for crystal\_04.  $U(\text{eq})$  is defined as one-third of the trace of the orthogonalized  $U^{ij}$  tensor.

|        | x         | y        | z        | $U(\text{eq})$ |
|--------|-----------|----------|----------|----------------|
| O(1)   | 5805(4)   | 7923(1)  | 326(1)   | 28(1)          |
| N(1)   | 2651(5)   | 8424(1)  | 356(1)   | 21(1)          |
| N(2)   | 4192(5)   | 7244(1)  | 1381(1)  | 22(1)          |
| C(1)   | 4018(6)   | 7972(2)  | 503(2)   | 22(1)          |
| C(2)   | 2900(5)   | 7514(2)  | 917(2)   | 21(1)          |
| C(3)   | 1052(6)   | 7885(2)  | 1145(2)  | 25(1)          |
| C(4)   | 593(6)    | 8319(2)  | 616(2)   | 24(1)          |
| C(5)   | 3004(7)   | 8893(2)  | -84(2)   | 28(1)          |
| C(6)   | 4853(8)   | 9213(2)  | -96(2)   | 36(1)          |
| C(7)   | 5106(10)  | 9697(2)  | -517(2)  | 52(2)          |
| C(8)   | 3560(10)  | 9843(2)  | -916(2)  | 55(2)          |
| C(9)   | 1739(10)  | 9513(2)  | -909(2)  | 48(1)          |
| C(10)  | 1437(8)   | 9041(2)  | -491(2)  | 37(1)          |
| C(11)  | 5902(6)   | 7510(2)  | 1649(2)  | 23(1)          |
| C(12)  | 3746(7)   | 6698(2)  | 1681(2)  | 28(1)          |
| C(13)  | 2130(8)   | 6283(2)  | 1605(2)  | 40(1)          |
| C(14)  | 2045(10)  | 5776(2)  | 1985(2)  | 60(2)          |
| C(15)  | 3577(11)  | 5676(3)  | 2420(3)  | 69(2)          |
| C(16)  | 5184(9)   | 6084(2)  | 2496(2)  | 51(1)          |
| C(17)  | 5283(7)   | 6617(2)  | 2131(2)  | 31(1)          |
| C(18)  | 8452(7)   | 7264(2)  | 2511(2)  | 37(1)          |
| C(19)  | 6624(6)   | 7142(2)  | 2106(2)  | 28(1)          |
| O(2)   | 8787(4)   | 9828(1)  | 1055(2)  | 40(1)          |
| N(4)   | 12242(5)  | 9986(2)  | 1265(2)  | 26(1)          |
| N(5)   | 9211(9)   | 11004(3) | 478(3)   | 23(1)          |
| N(5A)  | 9285(15)  | 10945(5) | 191(5)   | 21(2)          |
| C(10)  | 10453(6)  | 10079(2) | 962(2)   | 31(1)          |
| C(20)  | 10882(6)  | 10545(2) | 462(2)   | 34(1)          |
| C(21)  | 12967(6)  | 10828(2) | 619(2)   | 33(1)          |
| C(22)  | 14001(6)  | 10330(2) | 1002(2)  | 28(1)          |
| C(23)  | 12540(6)  | 9557(2)  | 1745(2)  | 27(1)          |
| C(24)  | 10942(8)  | 9423(2)  | 2144(2)  | 41(1)          |
| C(25)  | 11290(10) | 9020(2)  | 2622(2)  | 52(1)          |
| C(26)  | 13226(10) | 8756(2)  | 2711(2)  | 50(1)          |
| C(27)  | 14801(8)  | 8892(2)  | 2309(2)  | 43(1)          |
| C(28)  | 14459(7)  | 9291(2)  | 1831(2)  | 32(1)          |
| C(29)  | 8446(12)  | 11352(4) | 963(4)   | 24(2)          |
| C(29A) | 8640(20)  | 11095(7) | -392(7)  | 26(3)          |
| C(30)  | 8347(9)   | 11235(3) | -42(3)   | 22(1)          |
| C(30A) | 8361(17)  | 11352(6) | 577(6)   | 24(2)          |
| C(31)  | 8640(13)  | 11053(4) | -650(3)  | 29(2)          |
| C(31A) | 8490(20)  | 11417(7) | 1211(6)  | 23(2)          |
| C(32)  | 7513(10)  | 11371(3) | -1082(3) | 32(1)          |
| C(32A) | 7283(17)  | 11867(5) | 1476(6)  | 32(2)          |
| C(33)  | 6030(30)  | 11866(8) | -895(7)  | 36(3)          |

|        |          |           |          |       |
|--------|----------|-----------|----------|-------|
| C(33A) | 5900(70) | 12260(20) | 1089(11) | 32(4) |
| C(34)  | 5883(10) | 12034(3)  | -328(3)  | 33(1) |
| C(34A) | 5870(18) | 12200(5)  | 500(6)   | 32(2) |
| C(35)  | 6990(20) | 11722(6)  | 111(5)   | 24(2) |
| C(35A) | 7070(40) | 11748(11) | 243(8)   | 23(2) |
| C(36)  | 6020(40) | 12257(11) | 1169(6)  | 38(3) |
| C(36A) | 6270(50) | 11778(15) | -978(11) | 29(5) |
| C(38)  | 7239(17) | 11553(5)  | -388(5)  | 29(2) |
| C(39)  | 7129(9)  | 11786(3)  | 768(3)   | 28(1) |

**Table S-13.** Bond lengths [Å] and angles [°] for crystal\_04.

| Bond length [Å] |           | Bond angle [°]      |           |
|-----------------|-----------|---------------------|-----------|
| O(1)-C(1)       | 1.228(4)  | C(1)-N(1)-C(4)      | 112.8(3)  |
| N(1)-C(1)       | 1.356(5)  | C(1)-N(1)-C(5)      | 124.7(3)  |
| N(1)-C(4)       | 1.471(5)  | C(5)-N(1)-C(4)      | 121.6(3)  |
| N(1)-C(5)       | 1.419(5)  | C(11)-N(2)-C(2)     | 127.1(3)  |
| N(2)-C(2)       | 1.445(5)  | C(12)-N(2)-C(2)     | 124.1(3)  |
| N(2)-C(11)      | 1.381(5)  | C(12)-N(2)-C(11)    | 108.4(3)  |
| N(2)-C(12)      | 1.379(5)  | O(1)-C(1)-N(1)      | 127.0(3)  |
| C(1)-C(2)       | 1.526(5)  | O(1)-C(1)-C(2)      | 125.8(3)  |
| C(2)-C(3)       | 1.526(5)  | N(1)-C(1)-C(2)      | 107.2(3)  |
| C(3)-C(4)       | 1.523(5)  | N(2)-C(2)-C(1)      | 114.1(3)  |
| C(5)-C(6)       | 1.383(6)  | N(2)-C(2)-C(3)      | 115.5(3)  |
| C(5)-C(10)      | 1.394(6)  | C(3)-C(2)-C(1)      | 103.5(3)  |
| C(6)-C(7)       | 1.406(6)  | C(4)-C(3)-C(2)      | 102.7(3)  |
| C(7)-C(8)       | 1.370(8)  | N(1)-C(4)-C(3)      | 102.5(3)  |
| C(8)-C(9)       | 1.378(8)  | C(6)-C(5)-N(1)      | 120.5(4)  |
| C(9)-C(10)      | 1.387(6)  | C(6)-C(5)-C(10)     | 120.4(4)  |
| C(11)-C(19)     | 1.366(6)  | C(10)-C(5)-N(1)     | 119.1(4)  |
| C(12)-C(13)     | 1.386(6)  | C(5)-C(6)-C(7)      | 118.8(5)  |
| C(12)-C(17)     | 1.419(6)  | C(8)-C(7)-C(6)      | 120.7(5)  |
| C(13)-C(14)     | 1.378(6)  | C(7)-C(8)-C(9)      | 120.1(4)  |
| C(14)-C(15)     | 1.398(7)  | C(8)-C(9)-C(10)     | 120.4(5)  |
| C(15)-C(16)     | 1.373(7)  | C(9)-C(10)-C(5)     | 119.6(5)  |
| C(16)-C(17)     | 1.403(6)  | C(19)-C(11)-N(2)    | 110.6(3)  |
| C(17)-C(19)     | 1.425(6)  | N(2)-C(12)-C(13)    | 130.4(4)  |
| C(18)-C(19)     | 1.508(6)  | N(2)-C(12)-C(17)    | 107.1(3)  |
| O(2)-C(10)      | 1.225(5)  | C(13)-C(12)-C(17)   | 122.5(4)  |
| N(4)-C(10)      | 1.354(5)  | C(14)-C(13)-C(12)   | 117.8(4)  |
| N(4)-C(22)      | 1.478(5)  | C(13)-C(14)-C(15)   | 120.8(5)  |
| N(4)-C(23)      | 1.419(5)  | C(16)-C(15)-C(14)   | 121.7(4)  |
| N(5)-C(20)      | 1.466(6)  | C(15)-C(16)-C(17)   | 119.1(4)  |
| N(5)-C(29)      | 1.398(8)  | C(12)-C(17)-C(19)   | 107.8(3)  |
| N(5)-C(30)      | 1.372(8)  | C(16)-C(17)-C(12)   | 118.1(4)  |
| N(5A)-C(20)     | 1.474(9)  | C(16)-C(17)-C(19)   | 134.2(4)  |
| N(5A)-C(29A)    | 1.393(12) | C(11)-C(19)-C(17)   | 106.2(3)  |
| N(5A)-C(30A)    | 1.360(17) | C(11)-C(19)-C(18)   | 127.4(4)  |
| C(10)-C(20)     | 1.515(6)  | C(17)-C(19)-C(18)   | 126.5(4)  |
| C(20)-C(21)     | 1.522(6)  | C(10)-N(4)-C(22)    | 113.1(3)  |
| C(21)-C(22)     | 1.521(6)  | C(10)-N(4)-C(23)    | 125.7(3)  |
| C(23)-C(24)     | 1.390(6)  | C(23)-N(4)-C(22)    | 120.9(3)  |
| C(23)-C(28)     | 1.383(6)  | C(29)-N(5)-C(20)    | 129.9(6)  |
| C(24)-C(25)     | 1.383(7)  | C(30)-N(5)-C(20)    | 121.8(5)  |
| C(25)-C(26)     | 1.392(8)  | C(30)-N(5)-C(29)    | 107.6(6)  |
| C(26)-C(27)     | 1.384(7)  | C(29A)-N(5A)-C(20)  | 136.3(11) |
| C(27)-C(28)     | 1.380(6)  | C(30A)-N(5A)-C(20)  | 115.6(9)  |
| C(29)-C(39)     | 1.336(9)  | C(30A)-N(5A)-C(29A) | 107.2(10) |
| C(29A)-C(38)    | 1.339(13) | O(2)-C(10)-N(4)     | 127.3(4)  |

|               |           |                      |           |
|---------------|-----------|----------------------|-----------|
| C(30)-C(31)   | 1.413(8)  | O(2)-C(10)-C(20)     | 125.1(4)  |
| C(30)-C(35)   | 1.406(8)  | N(4)-C(10)-C(20)     | 107.5(3)  |
| C(30A)-C(31A) | 1.411(12) | N(5)-C(20)-C(10)     | 106.9(4)  |
| C(30A)-C(35A) | 1.403(12) | N(5)-C(20)-C(21)     | 112.4(4)  |
| C(31)-C(32)   | 1.382(10) | N(5A)-C(20)-C(10)    | 123.5(5)  |
| C(31A)-C(32A) | 1.376(13) | N(5A)-C(20)-C(21)    | 118.9(5)  |
| C(32)-C(33)   | 1.493(17) | C(10)-C(20)-C(21)    | 105.1(4)  |
| C(32A)-C(33A) | 1.49(2)   | C(22)-C(21)-C(20)    | 103.7(3)  |
| C(33)-C(34)   | 1.308(17) | N(4)-C(22)-C(21)     | 103.3(3)  |
| C(33A)-C(34A) | 1.31(2)   | C(24)-C(23)-N(4)     | 120.5(4)  |
| C(34)-C(35)   | 1.382(10) | C(28)-C(23)-N(4)     | 119.6(4)  |
| C(34A)-C(35A) | 1.368(13) | C(28)-C(23)-C(24)    | 119.9(4)  |
| C(35)-C(39)   | 1.462(12) | C(25)-C(24)-C(23)    | 119.5(5)  |
| C(35A)-C(38)  | 1.461(16) | C(24)-C(25)-C(26)    | 120.7(5)  |
| C(36)-C(39)   | 1.525(16) | C(27)-C(26)-C(25)    | 119.2(5)  |
| C(36A)-C(38)  | 1.53(2)   | C(28)-C(27)-C(26)    | 120.3(5)  |
|               |           | C(27)-C(28)-C(23)    | 120.4(4)  |
|               |           | C(39)-C(29)-N(5)     | 110.8(7)  |
|               |           | C(38)-C(29A)-N(5A)   | 111.7(13) |
|               |           | N(5)-C(30)-C(31)     | 129.8(6)  |
|               |           | N(5)-C(30)-C(35)     | 108.9(6)  |
|               |           | C(35)-C(30)-C(31)    | 121.3(7)  |
|               |           | N(5A)-C(30A)-C(31A)  | 131.2(11) |
|               |           | N(5A)-C(30A)-C(35A)  | 109.0(11) |
|               |           | C(35A)-C(30A)-C(31A) | 119.8(13) |
|               |           | C(32)-C(31)-C(30)    | 116.6(7)  |
|               |           | C(32A)-C(31A)-C(30A) | 117.3(13) |
|               |           | C(31)-C(32)-C(33)    | 120.2(8)  |
|               |           | C(31A)-C(32A)-C(33A) | 119.5(17) |
|               |           | C(34)-C(33)-C(32)    | 120.5(12) |
|               |           | C(34A)-C(33A)-C(32A) | 122(2)    |
|               |           | C(33)-C(34)-C(35)    | 120.0(9)  |
|               |           | C(33A)-C(34A)-C(35A) | 118.1(18) |
|               |           | C(30)-C(35)-C(39)    | 105.8(6)  |
|               |           | C(34)-C(35)-C(30)    | 121.2(8)  |
|               |           | C(34)-C(35)-C(39)    | 133.0(7)  |
|               |           | C(30A)-C(35A)-C(38)  | 106.4(11) |
|               |           | C(34A)-C(35A)-C(30A) | 123.5(15) |
|               |           | C(34A)-C(35A)-C(38)  | 130.0(12) |
|               |           | C(29A)-C(38)-C(35A)  | 105.5(11) |
|               |           | C(29A)-C(38)-C(36A)  | 120.5(15) |
|               |           | C(35A)-C(38)-C(36A)  | 133.9(14) |
|               |           | C(29)-C(39)-C(35)    | 107.0(6)  |
|               |           | C(29)-C(39)-C(36)    | 125.3(8)  |
|               |           | C(35)-C(39)-C(36)    | 127.7(7)  |

**Table S-14.** Anisotropic displacement parameters ( $\text{\AA}^2 \times 10^3$ ) for crystal\_04. The anisotropic displacement factor exponent takes the form:  $-2\pi^2 [h^2 a^{*2} U^{11} + \dots + 2 h k a^* b^* U^{12}]$ .

|        | U <sup>11</sup> | U <sup>22</sup> | U <sup>33</sup> | U <sup>23</sup> | U <sup>13</sup> | U <sup>12</sup> |
|--------|-----------------|-----------------|-----------------|-----------------|-----------------|-----------------|
| O(1)   | 21(1)           | 38(2)           | 26(1)           | -1(1)           | 5(1)            | -4(1)           |
| N(1)   | 22(2)           | 19(1)           | 23(2)           | -2(1)           | 3(1)            | -5(1)           |
| N(2)   | 20(2)           | 22(2)           | 24(2)           | -1(1)           | -2(1)           | -2(1)           |
| C(1)   | 20(2)           | 26(2)           | 19(2)           | -5(2)           | 0(2)            | -5(2)           |
| C(2)   | 17(2)           | 24(2)           | 23(2)           | -2(2)           | -2(2)           | -4(2)           |
| C(3)   | 20(2)           | 25(2)           | 31(2)           | 3(2)            | 6(2)            | -3(2)           |
| C(4)   | 19(2)           | 22(2)           | 30(2)           | 0(2)            | 3(2)            | 0(2)            |
| C(5)   | 42(2)           | 18(2)           | 24(2)           | -4(2)           | 11(2)           | -4(2)           |
| C(6)   | 47(3)           | 26(2)           | 34(2)           | -3(2)           | 18(2)           | -7(2)           |
| C(7)   | 76(4)           | 26(2)           | 54(3)           | -6(2)           | 43(3)           | -13(2)          |
| C(8)   | 98(5)           | 25(2)           | 41(3)           | 12(2)           | 38(3)           | 16(3)           |
| C(9)   | 84(4)           | 29(2)           | 31(2)           | 6(2)            | 11(2)           | 14(3)           |
| C(10)  | 56(3)           | 26(2)           | 31(2)           | -1(2)           | -1(2)           | 3(2)            |
| C(11)  | 17(2)           | 31(2)           | 22(2)           | -2(2)           | 2(2)            | -4(2)           |
| C(12)  | 37(2)           | 26(2)           | 21(2)           | 1(2)            | -5(2)           | -4(2)           |
| C(13)  | 50(3)           | 38(2)           | 31(2)           | 11(2)           | -15(2)          | -17(2)          |
| C(14)  | 82(4)           | 46(3)           | 53(3)           | 22(3)           | -31(3)          | -40(3)          |
| C(15)  | 97(5)           | 56(3)           | 53(3)           | 35(3)           | -42(3)          | -42(3)          |
| C(16)  | 69(4)           | 49(3)           | 34(3)           | 12(2)           | -30(2)          | -19(3)          |
| C(17)  | 39(2)           | 35(2)           | 21(2)           | 0(2)            | -6(2)           | -5(2)           |
| C(18)  | 32(2)           | 53(3)           | 24(2)           | 6(2)            | -7(2)           | -12(2)          |
| C(19)  | 26(2)           | 34(2)           | 23(2)           | -4(2)           | 2(2)            | -2(2)           |
| O(2)   | 16(1)           | 24(1)           | 82(2)           | 6(2)            | 2(2)            | -2(1)           |
| N(4)   | 19(2)           | 24(2)           | 36(2)           | -4(1)           | 4(1)            | -1(1)           |
| N(5)   | 24(2)           | 22(2)           | 23(3)           | -13(3)          | 2(3)            | 4(2)            |
| N(5A)  | 18(4)           | 20(4)           | 26(5)           | 12(4)           | -2(4)           | -6(4)           |
| C(10)  | 16(2)           | 20(2)           | 57(3)           | -7(2)           | 1(2)            | 4(2)            |
| C(20)  | 19(2)           | 23(2)           | 59(3)           | 3(2)            | -4(2)           | -1(2)           |
| C(21)  | 23(2)           | 27(2)           | 49(3)           | -1(2)           | 5(2)            | -3(2)           |
| C(22)  | 16(2)           | 31(2)           | 36(2)           | -7(2)           | 5(2)            | -6(2)           |
| C(23)  | 28(2)           | 26(2)           | 29(2)           | -10(2)          | 6(2)            | -7(2)           |
| C(24)  | 42(3)           | 37(2)           | 43(3)           | -14(2)          | 15(2)           | -11(2)          |
| C(25)  | 67(4)           | 47(3)           | 42(3)           | -7(2)           | 17(3)           | -23(3)          |
| C(26)  | 74(4)           | 43(3)           | 32(2)           | 1(2)            | -3(2)           | -20(3)          |
| C(27)  | 49(3)           | 37(2)           | 43(3)           | -4(2)           | -8(2)           | 0(2)            |
| C(28)  | 32(2)           | 33(2)           | 32(2)           | -8(2)           | -2(2)           | -4(2)           |
| C(29)  | 24(3)           | 23(3)           | 26(4)           | -12(4)          | 5(4)            | -1(2)           |
| C(29A) | 21(5)           | 29(5)           | 28(6)           | 9(6)            | 0(6)            | -5(4)           |
| C(30)  | 16(2)           | 21(3)           | 31(3)           | -6(2)           | 1(2)            | -3(2)           |
| C(30A) | 19(4)           | 21(4)           | 30(4)           | 12(4)           | 2(4)            | -4(3)           |
| C(31)  | 25(3)           | 32(3)           | 31(4)           | -11(3)          | -1(3)           | -3(2)           |
| C(31A) | 22(4)           | 21(5)           | 28(5)           | 7(5)            | 5(5)            | -2(4)           |
| C(32)  | 26(3)           | 38(3)           | 33(3)           | 0(3)            | -4(3)           | -10(3)          |
| C(32A) | 22(5)           | 31(5)           | 42(5)           | -1(4)           | 5(4)            | -4(4)           |
| C(33)  | 27(5)           | 40(5)           | 42(5)           | 20(4)           | -4(4)           | 2(4)            |

|        |       |       |       |        |        |       |
|--------|-------|-------|-------|--------|--------|-------|
| C(33A) | 20(6) | 25(7) | 50(6) | -10(6) | 3(6)   | -5(6) |
| C(34)  | 21(3) | 28(3) | 50(3) | 6(3)   | -2(3)  | -3(2) |
| C(34A) | 23(4) | 23(4) | 51(5) | 15(4)  | -5(4)  | -2(4) |
| C(35)  | 16(3) | 16(3) | 41(4) | 3(3)   | -3(3)  | -5(2) |
| C(35A) | 15(4) | 21(4) | 34(5) | 18(4)  | -6(4)  | -3(4) |
| C(36)  | 31(6) | 25(4) | 58(6) | -14(5) | 13(6)  | 2(4)  |
| C(36A) | 16(8) | 39(9) | 32(8) | 1(7)   | -11(7) | 3(7)  |
| C(38)  | 25(4) | 30(4) | 34(4) | 18(4)  | -3(4)  | -5(3) |
| C(39)  | 23(2) | 19(2) | 41(3) | -9(2)  | 4(2)   | -2(2) |

**Table S-15.** Hydrogen coordinates ( $\times 10^4$ ) and isotropic displacement parameters ( $\text{\AA}^2 \times 10^3$ ) for crystal\_04.

|        | x     | y     | z     | U(eq) |
|--------|-------|-------|-------|-------|
| H(2)   | 2364  | 7167  | 659   | 26    |
| H(3A)  | -136  | 7610  | 1231  | 30    |
| H(3B)  | 1403  | 8123  | 1515  | 30    |
| H(4A)  | -340  | 8120  | 319   | 28    |
| H(4B)  | -32   | 8713  | 757   | 28    |
| H(6)   | 5934  | 9108  | 176   | 43    |
| H(7)   | 6360  | 9925  | -526  | 62    |
| H(8)   | 3744  | 10173 | -1197 | 66    |
| H(9)   | 685   | 9610  | -1193 | 58    |
| H(10)  | 171   | 8819  | -483  | 45    |
| H(11)  | 6494  | 7895  | 1531  | 28    |
| H(13)  | 1115  | 6346  | 1301  | 48    |
| H(14)  | 932   | 5490  | 1951  | 72    |
| H(15)  | 3504  | 5316  | 2669  | 82    |
| H(16)  | 6217  | 6007  | 2791  | 61    |
| H(18A) | 8013  | 7247  | 2935  | 55    |
| H(18B) | 9018  | 7676  | 2422  | 55    |
| H(18C) | 9511  | 6947  | 2439  | 55    |
| H(20)  | 10936 | 10333 | 60    | 40    |
| H(20A) | 11245 | 10266 | 116   | 40    |
| H(21A) | 13777 | 10915 | 249   | 40    |
| H(21B) | 12798 | 11218 | 851   | 40    |
| H(22A) | 14867 | 10053 | 749   | 33    |
| H(22B) | 14867 | 10517 | 1322  | 33    |
| H(24)  | 9621  | 9605  | 2089  | 49    |
| H(25)  | 10196 | 8924  | 2892  | 62    |
| H(26)  | 13463 | 8486  | 3044  | 59    |
| H(27)  | 16122 | 8709  | 2363  | 51    |
| H(28)  | 15551 | 9384  | 1559  | 39    |
| H(29)  | 8812  | 11289 | 1375  | 29    |
| H(29A) | 9126  | 10897 | -748  | 31    |
| H(31)  | 9565  | 10728 | -757  | 35    |
| H(31A) | 9377  | 11161 | 1446  | 28    |
| H(32)  | 7683  | 11274 | -1498 | 39    |
| H(32A) | 7327  | 11930 | 1901  | 38    |
| H(33)  | 5185  | 12060 | -1191 | 44    |
| H(33A) | 5024  | 12553 | 1276  | 38    |
| H(34)  | 5011  | 12370 | -217  | 39    |
| H(34A) | 5037  | 12464 | 258   | 39    |
| H(36A) | 6410  | 12679 | 1047  | 57    |
| H(36B) | 6411  | 12189 | 1592  | 57    |
| H(36C) | 4526  | 12205 | 1125  | 57    |
| H(36D) | 7062  | 11618 | -1322 | 44    |
| H(36E) | 6275  | 12234 | -988  | 44    |

H(36F)

4844

11628

-1004

44



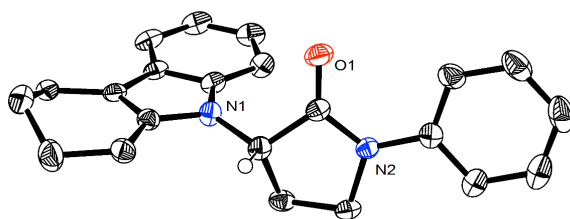

**Figure S-6.** Structure of (3*S*)-3-(3,4-dihydro-1*H*-carbazol-9(2*H*)-yl)-1-phenylpyrrolidin-2-one.

**(3*S*)-3-(3,4-dihydro-1*H*-carbazol-9(2*H*)-yl)-1-phenylpyrrolidin-2-one (Table 3, entry 2; synthesized using (S)-L\*).** A suitable crystal for X-ray crystallography was grown by vapor diffusion with Et<sub>2</sub>O and hexane.

A crystal of C<sub>22</sub>H<sub>22</sub>N<sub>2</sub>O was selected and mounted in a nylon loop in immersion oil. All measurements were made on a Bruker Photon diffractometer with filtered Cu-K $\alpha$  radiation at a temperature of 100 K. Using Olex2,<sup>6</sup> the structure was solved with the ShelXS structure solution program using Direct Methods and refined with the ShelXL refinement package<sup>5</sup> using least squares minimization. The absolute stereochemistry was determined on the basis of the absolute structure parameter.

**Table S-16.** Crystal data and structure refinement for crystal\_05.

|                                   |                                                                                              |
|-----------------------------------|----------------------------------------------------------------------------------------------|
| Identification code               | crystal_05                                                                                   |
| Empirical formula                 | C <sub>22</sub> H <sub>22</sub> N <sub>2</sub> O                                             |
| Formula weight                    | 330.41                                                                                       |
| Temperature                       | 100 K                                                                                        |
| Wavelength                        | 1.54178 Å                                                                                    |
| Crystal system                    | Orthorhombic                                                                                 |
| Space group                       | P2 <sub>1</sub> 2 <sub>1</sub> 2 <sub>1</sub>                                                |
| Unit cell dimensions              | a = 9.0886(6) Å    α = 90°.<br>b = 10.7170(7) Å    β = 90°.<br>c = 17.6036(11) Å    γ = 90°. |
| Volume                            | 1714.64(19) Å <sup>3</sup>                                                                   |
| Z                                 | 4                                                                                            |
| Density (calculated)              | 1.280 Mg/m <sup>3</sup>                                                                      |
| Absorption coefficient            | 0.616 mm <sup>-1</sup>                                                                       |
| F(000)                            | 704                                                                                          |
| Crystal size                      | 0.27 x 0.22 x 0.09 mm <sup>3</sup>                                                           |
| Theta range for data collection   | 4.831 to 79.321°.                                                                            |
| Index ranges                      | -11 ≤ h ≤ 11, -13 ≤ k ≤ 13, -22 ≤ l ≤ 22                                                     |
| Reflections collected             | 82723                                                                                        |
| Independent reflections           | 3706 [R(int) = 0.0489]                                                                       |
| Completeness to theta = 67.679°   | 100.0 %                                                                                      |
| Absorption correction             | Semi-empirical from equivalents                                                              |
| Max. and min. transmission        | 0.7542 and 0.6622                                                                            |
| Refinement method                 | Full-matrix least-squares on F <sup>2</sup>                                                  |
| Data / restraints / parameters    | 3706 / 0 / 226                                                                               |
| Goodness-of-fit on F <sup>2</sup> | 1.034                                                                                        |
| Final R indices [I > 2σ(I)]       | R1 = 0.0390, wR2 = 0.1012                                                                    |
| R indices (all data)              | R1 = 0.0401, wR2 = 0.1027                                                                    |
| Absolute structure parameter      | 0.01(6)                                                                                      |
| Largest diff. peak and hole       | 0.317 and -0.250 e/Å <sup>-3</sup>                                                           |

**Table S–17.** Atomic coordinates ( $\times 10^4$ ) and equivalent isotropic displacement parameters ( $\text{\AA}^2 \times 10^3$ ) for crystal\_05.  $U(\text{eq})$  is defined as one-third of the trace of the orthogonalized  $U^{ij}$  tensor.

|       | x         | y        | z        | U(eq) |
|-------|-----------|----------|----------|-------|
| O(1)  | -8695(2)  | -6943(2) | -2555(1) | 35(1) |
| N(1)  | -11681(2) | -7667(2) | -2174(1) | 26(1) |
| N(2)  | -8872(2)  | -8428(2) | -3509(1) | 23(1) |
| C(1)  | -9290(2)  | -7826(2) | -2860(1) | 24(1) |
| C(2)  | -10670(2) | -8484(2) | -2566(1) | 25(1) |
| C(3)  | -11280(2) | -9157(2) | -3261(1) | 29(1) |
| C(4)  | -9900(2)  | -9436(2) | -3723(1) | 26(1) |
| C(5)  | -7518(2)  | -8280(2) | -3898(1) | 26(1) |
| C(6)  | -6489(2)  | -7366(2) | -3686(1) | 33(1) |
| C(7)  | -5156(3)  | -7280(2) | -4071(2) | 42(1) |
| C(8)  | -4828(3)  | -8081(2) | -4669(2) | 45(1) |
| C(9)  | -5848(3)  | -8960(2) | -4882(1) | 39(1) |
| C(10) | -7191(3)  | -9079(2) | -4502(1) | 31(1) |
| C(11) | -12426(2) | -7971(2) | -1509(1) | 24(1) |
| C(12) | -12014(2) | -9025(2) | -999(1)  | 29(1) |
| C(13) | -13159(3) | -9174(2) | -374(2)  | 44(1) |
| C(14) | -13762(3) | -7966(2) | -78(1)   | 42(1) |
| C(15) | -14516(2) | -7206(2) | -705(1)  | 31(1) |
| C(16) | -13540(2) | -7139(2) | -1385(1) | 25(1) |
| C(17) | -13513(2) | -6268(2) | -2004(1) | 25(1) |
| C(18) | -14339(3) | -5199(2) | -2183(1) | 32(1) |
| C(19) | -13949(3) | -4506(2) | -2823(1) | 36(1) |
| C(20) | -12778(3) | -4859(2) | -3282(1) | 35(1) |
| C(21) | -11953(3) | -5928(2) | -3131(1) | 31(1) |
| C(22) | -12338(2) | -6616(2) | -2482(1) | 26(1) |

**Table S-18.** Bond lengths [Å] and angles [°] for crystal\_05.

| Bond length [Å] |          | Bond angle [°]    |            |
|-----------------|----------|-------------------|------------|
| O(1)-C(1)       | 1.215(3) | C(11)-N(1)-C(2)   | 124.72(17) |
| N(1)-C(2)       | 1.444(3) | C(22)-N(1)-C(2)   | 125.49(17) |
| N(1)-C(11)      | 1.392(3) | C(22)-N(1)-C(11)  | 108.04(17) |
| N(1)-C(22)      | 1.386(2) | C(1)-N(2)-C(4)    | 112.51(16) |
| N(2)-C(1)       | 1.367(2) | C(1)-N(2)-C(5)    | 126.29(17) |
| N(2)-C(4)       | 1.477(2) | C(5)-N(2)-C(4)    | 120.59(16) |
| N(2)-C(5)       | 1.417(3) | O(1)-C(1)-N(2)    | 127.9(2)   |
| C(1)-C(2)       | 1.530(3) | O(1)-C(1)-C(2)    | 125.10(19) |
| C(2)-C(3)       | 1.524(3) | N(2)-C(1)-C(2)    | 107.00(17) |
| C(3)-C(4)       | 1.525(3) | N(1)-C(2)-C(1)    | 113.78(17) |
| C(5)-C(6)       | 1.404(3) | N(1)-C(2)-C(3)    | 116.01(17) |
| C(5)-C(10)      | 1.398(3) | C(3)-C(2)-C(1)    | 104.22(16) |
| C(6)-C(7)       | 1.391(3) | C(2)-C(3)-C(4)    | 102.81(16) |
| C(7)-C(8)       | 1.390(4) | N(2)-C(4)-C(3)    | 103.98(15) |
| C(8)-C(9)       | 1.374(4) | C(6)-C(5)-N(2)    | 121.93(18) |
| C(9)-C(10)      | 1.398(3) | C(10)-C(5)-N(2)   | 118.89(19) |
| C(11)-C(12)     | 1.491(3) | C(10)-C(5)-C(6)   | 119.2(2)   |
| C(11)-C(16)     | 1.366(3) | C(7)-C(6)-C(5)    | 119.8(2)   |
| C(12)-C(13)     | 1.523(3) | C(8)-C(7)-C(6)    | 121.0(2)   |
| C(13)-C(14)     | 1.499(4) | C(9)-C(8)-C(7)    | 119.0(2)   |
| C(14)-C(15)     | 1.533(4) | C(8)-C(9)-C(10)   | 121.4(2)   |
| C(15)-C(16)     | 1.492(3) | C(9)-C(10)-C(5)   | 119.6(2)   |
| C(16)-C(17)     | 1.433(3) | N(1)-C(11)-C(12)  | 124.17(17) |
| C(17)-C(18)     | 1.406(3) | C(16)-C(11)-N(1)  | 109.99(17) |
| C(17)-C(22)     | 1.410(3) | C(16)-C(11)-C(12) | 125.81(18) |
| C(18)-C(19)     | 1.395(3) | C(11)-C(12)-C(13) | 109.99(18) |
| C(19)-C(20)     | 1.388(4) | C(14)-C(13)-C(12) | 114.3(2)   |
| C(20)-C(21)     | 1.395(3) | C(13)-C(14)-C(15) | 111.8(2)   |
| C(21)-C(22)     | 1.404(3) | C(16)-C(15)-C(14) | 109.75(19) |
|                 |          | C(11)-C(16)-C(15) | 122.44(19) |
|                 |          | C(11)-C(16)-C(17) | 106.93(17) |
|                 |          | C(17)-C(16)-C(15) | 130.63(18) |
|                 |          | C(18)-C(17)-C(16) | 133.8(2)   |
|                 |          | C(18)-C(17)-C(22) | 119.0(2)   |
|                 |          | C(22)-C(17)-C(16) | 107.15(17) |
|                 |          | C(19)-C(18)-C(17) | 118.7(2)   |
|                 |          | C(20)-C(19)-C(18) | 121.3(2)   |
|                 |          | C(19)-C(20)-C(21) | 121.7(2)   |
|                 |          | C(20)-C(21)-C(22) | 116.8(2)   |
|                 |          | N(1)-C(22)-C(17)  | 107.89(18) |
|                 |          | N(1)-C(22)-C(21)  | 129.6(2)   |
|                 |          | C(21)-C(22)-C(17) | 122.47(19) |

**Table S–19.** Anisotropic displacement parameters ( $\text{\AA}^2 \times 10^3$ ) for crystal\_05. The anisotropic displacement factor exponent takes the form:  $-2\pi^2 [ h^2 a^{*2} U^{11} + \dots + 2 h k a^* b^* U^{12} ]$ .

|       | U <sup>11</sup> | U <sup>22</sup> | U <sup>33</sup> | U <sup>23</sup> | U <sup>13</sup> | U <sup>12</sup> |
|-------|-----------------|-----------------|-----------------|-----------------|-----------------|-----------------|
| O(1)  | 32(1)           | 32(1)           | 41(1)           | -14(1)          | -2(1)           | -2(1)           |
| N(1)  | 27(1)           | 25(1)           | 26(1)           | 4(1)            | 1(1)            | 7(1)            |
| N(2)  | 24(1)           | 21(1)           | 24(1)           | -1(1)           | -1(1)           | 2(1)            |
| C(1)  | 24(1)           | 23(1)           | 26(1)           | -1(1)           | -3(1)           | 5(1)            |
| C(2)  | 25(1)           | 23(1)           | 28(1)           | 2(1)            | 0(1)            | 6(1)            |
| C(3)  | 26(1)           | 22(1)           | 38(1)           | -1(1)           | -4(1)           | 1(1)            |
| C(4)  | 27(1)           | 22(1)           | 31(1)           | -6(1)           | -6(1)           | 1(1)            |
| C(5)  | 27(1)           | 24(1)           | 26(1)           | 7(1)            | -1(1)           | 6(1)            |
| C(6)  | 34(1)           | 23(1)           | 42(1)           | 5(1)            | 2(1)            | 0(1)            |
| C(7)  | 35(1)           | 31(1)           | 61(2)           | 15(1)           | 5(1)            | -3(1)           |
| C(8)  | 40(1)           | 42(1)           | 52(2)           | 24(1)           | 17(1)           | 8(1)            |
| C(9)  | 47(1)           | 42(1)           | 28(1)           | 12(1)           | 9(1)            | 20(1)           |
| C(10) | 35(1)           | 32(1)           | 25(1)           | 4(1)            | 0(1)            | 9(1)            |
| C(11) | 23(1)           | 24(1)           | 26(1)           | -1(1)           | -1(1)           | -1(1)           |
| C(12) | 34(1)           | 24(1)           | 30(1)           | 4(1)            | 2(1)            | 1(1)            |
| C(13) | 54(2)           | 36(1)           | 42(1)           | 11(1)           | 18(1)           | 4(1)            |
| C(14) | 52(2)           | 40(1)           | 33(1)           | -3(1)           | 10(1)           | -2(1)           |
| C(15) | 32(1)           | 25(1)           | 37(1)           | -9(1)           | 10(1)           | -4(1)           |
| C(16) | 24(1)           | 21(1)           | 30(1)           | -7(1)           | -1(1)           | -2(1)           |
| C(17) | 26(1)           | 23(1)           | 27(1)           | -7(1)           | -6(1)           | 2(1)            |
| C(18) | 34(1)           | 28(1)           | 34(1)           | -10(1)          | -10(1)          | 8(1)            |
| C(19) | 45(1)           | 28(1)           | 35(1)           | -2(1)           | -14(1)          | 9(1)            |
| C(20) | 45(1)           | 27(1)           | 32(1)           | 4(1)            | -11(1)          | 3(1)            |
| C(21) | 36(1)           | 29(1)           | 27(1)           | 3(1)            | -1(1)           | 6(1)            |
| C(22) | 28(1)           | 23(1)           | 27(1)           | -1(1)           | -6(1)           | 5(1)            |

**Table S–20.** Hydrogen coordinates ( $\times 10^4$ ) and isotropic displacement parameters ( $\text{\AA}^2 \times 10^3$ ) for crystal\_05.

|        | x      | y      | z     | U(eq) |
|--------|--------|--------|-------|-------|
| H(2)   | -10345 | -9136  | -2196 | 30    |
| H(3A)  | -11968 | -8617  | -3547 | 34    |
| H(3B)  | -11794 | -9935  | -3114 | 34    |
| H(4A)  | -9492  | -10264 | -3590 | 32    |
| H(4B)  | -10114 | -9415  | -4274 | 32    |
| H(6)   | -6702  | -6809  | -3282 | 40    |
| H(7)   | -4459  | -6666  | -3923 | 51    |
| H(8)   | -3912  | -8021  | -4927 | 54    |
| H(9)   | -5636  | -9499  | -5297 | 47    |
| H(10)  | -7878  | -9699  | -4654 | 37    |
| H(12A) | -11038 | -8862  | -770  | 35    |
| H(12B) | -11948 | -9806  | -1298 | 35    |
| H(13A) | -13984 | -9681  | -573  | 53    |
| H(13B) | -12712 | -9639  | 53    | 53    |
| H(14A) | -12950 | -7468  | 143   | 50    |
| H(14B) | -14480 | -8141  | 331   | 50    |
| H(15A) | -15460 | -7605  | -845  | 38    |
| H(15B) | -14727 | -6354  | -518  | 38    |
| H(18)  | -15147 | -4953  | -1875 | 38    |
| H(19)  | -14494 | -3778  | -2947 | 43    |
| H(20)  | -12534 | -4360  | -3710 | 42    |
| H(21)  | -11167 | -6180  | -3453 | 37    |

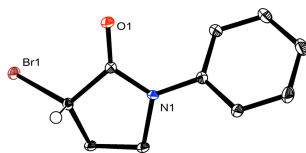

**Figure S-7.** Structure of (3*S*)-3-Bromo-1-phenylpyrrolidin-2-one.

**(3*S*)-3-Bromo-1-phenylpyrrolidin-2-one.** A suitable crystal for X-ray crystallography was grown by vapor diffusion with isopropanol and hexane.

A crystal of C<sub>10</sub>H<sub>10</sub>BrNO was selected and mounted in a nylon loop in immersion oil. All measurements were made on a Bruker APEX2 diffractometer with filtered Mo-K $\alpha$  radiation at a temperature of 100 K. Using Olex2,<sup>6</sup> the structure was solved with the ShelXS structure solution program using Direct Methods and refined with the ShelXL refinement package<sup>5</sup> using least squares minimization. The absolute stereochemistry was determined on the basis of the absolute structure parameter.

**Table S-21.** Crystal data and structure refinement for crystal\_06.

|                                   |                                                                                                                                                                                                    |
|-----------------------------------|----------------------------------------------------------------------------------------------------------------------------------------------------------------------------------------------------|
| Identification code               | crystal_06                                                                                                                                                                                         |
| Empirical formula                 | C <sub>10</sub> H <sub>10</sub> BrNO                                                                                                                                                               |
| Formula weight                    | 240.10                                                                                                                                                                                             |
| Temperature                       | 100 K                                                                                                                                                                                              |
| Wavelength                        | 0.71073 Å                                                                                                                                                                                          |
| Crystal system                    | Orthorhombic                                                                                                                                                                                       |
| Space group                       | P2 <sub>1</sub> 2 <sub>1</sub> 2 <sub>1</sub>                                                                                                                                                      |
| Unit cell dimensions              | a = 6.3666(3) Å $\overset{\circ}{\text{A}}\alpha = 90^\circ$ .<br>b = 7.8280(3) Å $\overset{\circ}{\text{A}}\beta = 90^\circ$ .<br>c = 18.4770(7) Å $\overset{\circ}{\text{A}}\gamma = 90^\circ$ . |
| Volume                            | 920.85(7) Å <sup>3</sup>                                                                                                                                                                           |
| Z                                 | 4                                                                                                                                                                                                  |
| Density (calculated)              | 1.732 Mg/m <sup>3</sup>                                                                                                                                                                            |
| Absorption coefficient            | 4.419 mm <sup>-1</sup>                                                                                                                                                                             |
| F(000)                            | 480                                                                                                                                                                                                |
| Crystal size                      | 0.3 x 0.25 x 0.25 mm <sup>3</sup>                                                                                                                                                                  |
| Theta range for data collection   | 2.204 to 36.357°.                                                                                                                                                                                  |
| Index ranges                      | -10 ≤ h ≤ 9, -12 ≤ k ≤ 13, -28 ≤ l ≤ 30                                                                                                                                                            |
| Reflections collected             | 26373                                                                                                                                                                                              |
| Independent reflections           | 4469 [R(int) = 0.0353]                                                                                                                                                                             |
| Completeness to theta = 25.242°   | 100.0 %                                                                                                                                                                                            |
| Absorption correction             | Semi-empirical from equivalents                                                                                                                                                                    |
| Max. and min. transmission        | 0.7471 and 0.6353                                                                                                                                                                                  |
| Refinement method                 | Full-matrix least-squares on F <sup>2</sup>                                                                                                                                                        |
| Data / restraints / parameters    | 4469 / 0 / 118                                                                                                                                                                                     |
| Goodness-of-fit on F <sup>2</sup> | 1.008                                                                                                                                                                                              |
| Final R indices [I > 2σ(I)]       | R1 = 0.0211, wR2 = 0.0441                                                                                                                                                                          |
| R indices (all data)              | R1 = 0.0252, wR2 = 0.0449                                                                                                                                                                          |
| Absolute structure parameter      | 0.010(4)                                                                                                                                                                                           |
| Largest diff. peak and hole       | 0.520 and -0.437 e/Å <sup>-3</sup>                                                                                                                                                                 |



**Table S–22.** Atomic coordinates ( $\times 10^4$ ) and equivalent isotropic displacement parameters ( $\text{\AA}^2 \times 10^3$ ) for crystal\_06.  $U(\text{eq})$  is defined as one-third of the trace of the orthogonalized  $U^{ij}$  tensor.

|       | x        | y       | z       | U(eq) |
|-------|----------|---------|---------|-------|
| Br(1) | -2601(1) | 3918(1) | 3964(1) | 13(1) |
| O(1)  | -2221(2) | 4360(1) | 5681(1) | 14(1) |
| N(1)  | 1088(2)  | 5550(2) | 5554(1) | 9(1)  |
| C(1)  | -628(2)  | 4642(2) | 5335(1) | 9(1)  |
| C(2)  | -129(2)  | 3999(2) | 4575(1) | 10(1) |
| C(3)  | 1571(3)  | 5194(2) | 4304(1) | 12(1) |
| C(4)  | 2748(3)  | 5627(2) | 5002(1) | 12(1) |
| C(5)  | 1435(2)  | 6164(2) | 6269(1) | 10(1) |
| C(6)  | 3444(2)  | 6051(2) | 6564(1) | 13(1) |
| C(7)  | 3828(3)  | 6737(2) | 7249(1) | 18(1) |
| C(8)  | 2233(3)  | 7546(2) | 7627(1) | 18(1) |
| C(9)  | 231(3)   | 7632(2) | 7334(1) | 15(1) |
| C(10) | -182(3)  | 6928(2) | 6655(1) | 12(1) |

**Table S-23.** Bond lengths [Å] and angles [°] for crystal\_06.

|            | Bond length [Å] |                 | Bond angle [°] |
|------------|-----------------|-----------------|----------------|
| Br(1)-C(2) | 1.9389(14)      | C(1)-N(1)-C(4)  | 112.99(12)     |
| O(1)-C(1)  | 1.2192(19)      | C(1)-N(1)-C(5)  | 125.19(13)     |
| N(1)-C(1)  | 1.365(2)        | C(5)-N(1)-C(4)  | 121.23(12)     |
| N(1)-C(4)  | 1.4703(19)      | O(1)-C(1)-N(1)  | 127.20(13)     |
| N(1)-C(5)  | 1.4219(19)      | O(1)-C(1)-C(2)  | 126.59(13)     |
| C(1)-C(2)  | 1.524(2)        | N(1)-C(1)-C(2)  | 106.19(13)     |
| C(2)-C(3)  | 1.516(2)        | C(1)-C(2)-Br(1) | 112.22(10)     |
| C(3)-C(4)  | 1.531(2)        | C(3)-C(2)-Br(1) | 114.00(10)     |
| C(5)-C(6)  | 1.393(2)        | C(3)-C(2)-C(1)  | 104.47(12)     |
| C(5)-C(10) | 1.388(2)        | C(2)-C(3)-C(4)  | 101.94(11)     |
| C(6)-C(7)  | 1.396(2)        | N(1)-C(4)-C(3)  | 102.93(12)     |
| C(7)-C(8)  | 1.386(3)        | C(6)-C(5)-N(1)  | 118.97(14)     |
| C(8)-C(9)  | 1.387(3)        | C(10)-C(5)-N(1) | 120.53(14)     |
| C(9)-C(10) | 1.395(2)        | C(10)-C(5)-C(6) | 120.46(14)     |
|            |                 | C(5)-C(6)-C(7)  | 119.41(15)     |
|            |                 | C(8)-C(7)-C(6)  | 120.31(16)     |
|            |                 | C(7)-C(8)-C(9)  | 119.91(14)     |
|            |                 | C(8)-C(9)-C(10) | 120.34(16)     |
|            |                 | C(5)-C(10)-C(9) | 119.54(16)     |

**Table S–24.** Anisotropic displacement parameters ( $\text{\AA}^2 \times 10^3$ ) for crystal\_06. The anisotropic displacement factor exponent takes the form:  $-2\pi^2 [h^2 a^{*2} U^{11} + \dots + 2 h k a^* b^* U^{12}]$ .

|       | U <sup>11</sup> | U <sup>22</sup> | U <sup>33</sup> | U <sup>23</sup> | U <sup>13</sup> | U <sup>12</sup> |
|-------|-----------------|-----------------|-----------------|-----------------|-----------------|-----------------|
| Br(1) | 11(1)           | 20(1)           | 9(1)            | 0(1)            | -2(1)           | -2(1)           |
| O(1)  | 11(1)           | 19(1)           | 11(1)           | -1(1)           | 2(1)            | -4(1)           |
| N(1)  | 8(1)            | 12(1)           | 9(1)            | 0(1)            | 2(1)            | 0(1)            |
| C(1)  | 9(1)            | 8(1)            | 9(1)            | 1(1)            | 0(1)            | 0(1)            |
| C(2)  | 10(1)           | 10(1)           | 9(1)            | -1(1)           | -1(1)           | 0(1)            |
| C(3)  | 9(1)            | 16(1)           | 10(1)           | 0(1)            | 2(1)            | -2(1)           |
| C(4)  | 9(1)            | 16(1)           | 12(1)           | 0(1)            | 2(1)            | -2(1)           |
| C(5)  | 12(1)           | 8(1)            | 9(1)            | 1(1)            | 0(1)            | -1(1)           |
| C(6)  | 10(1)           | 18(1)           | 11(1)           | -1(1)           | -2(1)           | -1(1)           |
| C(7)  | 16(1)           | 25(1)           | 13(1)           | 0(1)            | -5(1)           | -3(1)           |
| C(8)  | 24(1)           | 19(1)           | 10(1)           | -2(1)           | 0(1)            | -5(1)           |
| C(9)  | 21(1)           | 15(1)           | 11(1)           | -1(1)           | 3(1)            | 0(1)            |
| C(10) | 13(1)           | 11(1)           | 12(1)           | 0(1)            | 2(1)            | 1(1)            |

**Table S-25.** Hydrogen coordinates ( $\times 10^4$ ) and isotropic displacement parameters ( $\text{\AA}^2 \times 10^3$ ) for crystal\_06.

|       | x     | y    | z    | U(eq) |
|-------|-------|------|------|-------|
| H(2)  | 470   | 2822 | 4613 | 11    |
| H(3A) | 962   | 6230 | 4079 | 14    |
| H(3B) | 2501  | 4619 | 3950 | 14    |
| H(4A) | 3868  | 4781 | 5102 | 15    |
| H(4B) | 3379  | 6781 | 4977 | 15    |
| H(6)  | 4543  | 5512 | 6301 | 16    |
| H(7)  | 5189  | 6649 | 7456 | 22    |
| H(8)  | 2511  | 8041 | 8087 | 21    |
| H(9)  | -866  | 8173 | 7597 | 18    |
| H(10) | -1560 | 6972 | 6459 | 14    |

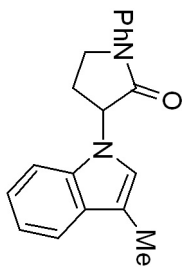

8.5  
8.0  
7.5  
7.0  
6.5  
6.0  
5.5  
5.0  
4.5  
4.0  
3.5  
3.0  
2.5  
2.0  
1.5  
1.0  
0.5  
0.0

f1 (ppm)

1.98  
1.00  
2.18  
6.37  
1.02

1.00

1.90

0.89

4.35

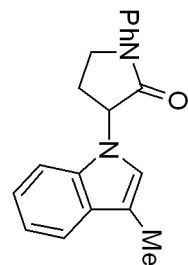

.79

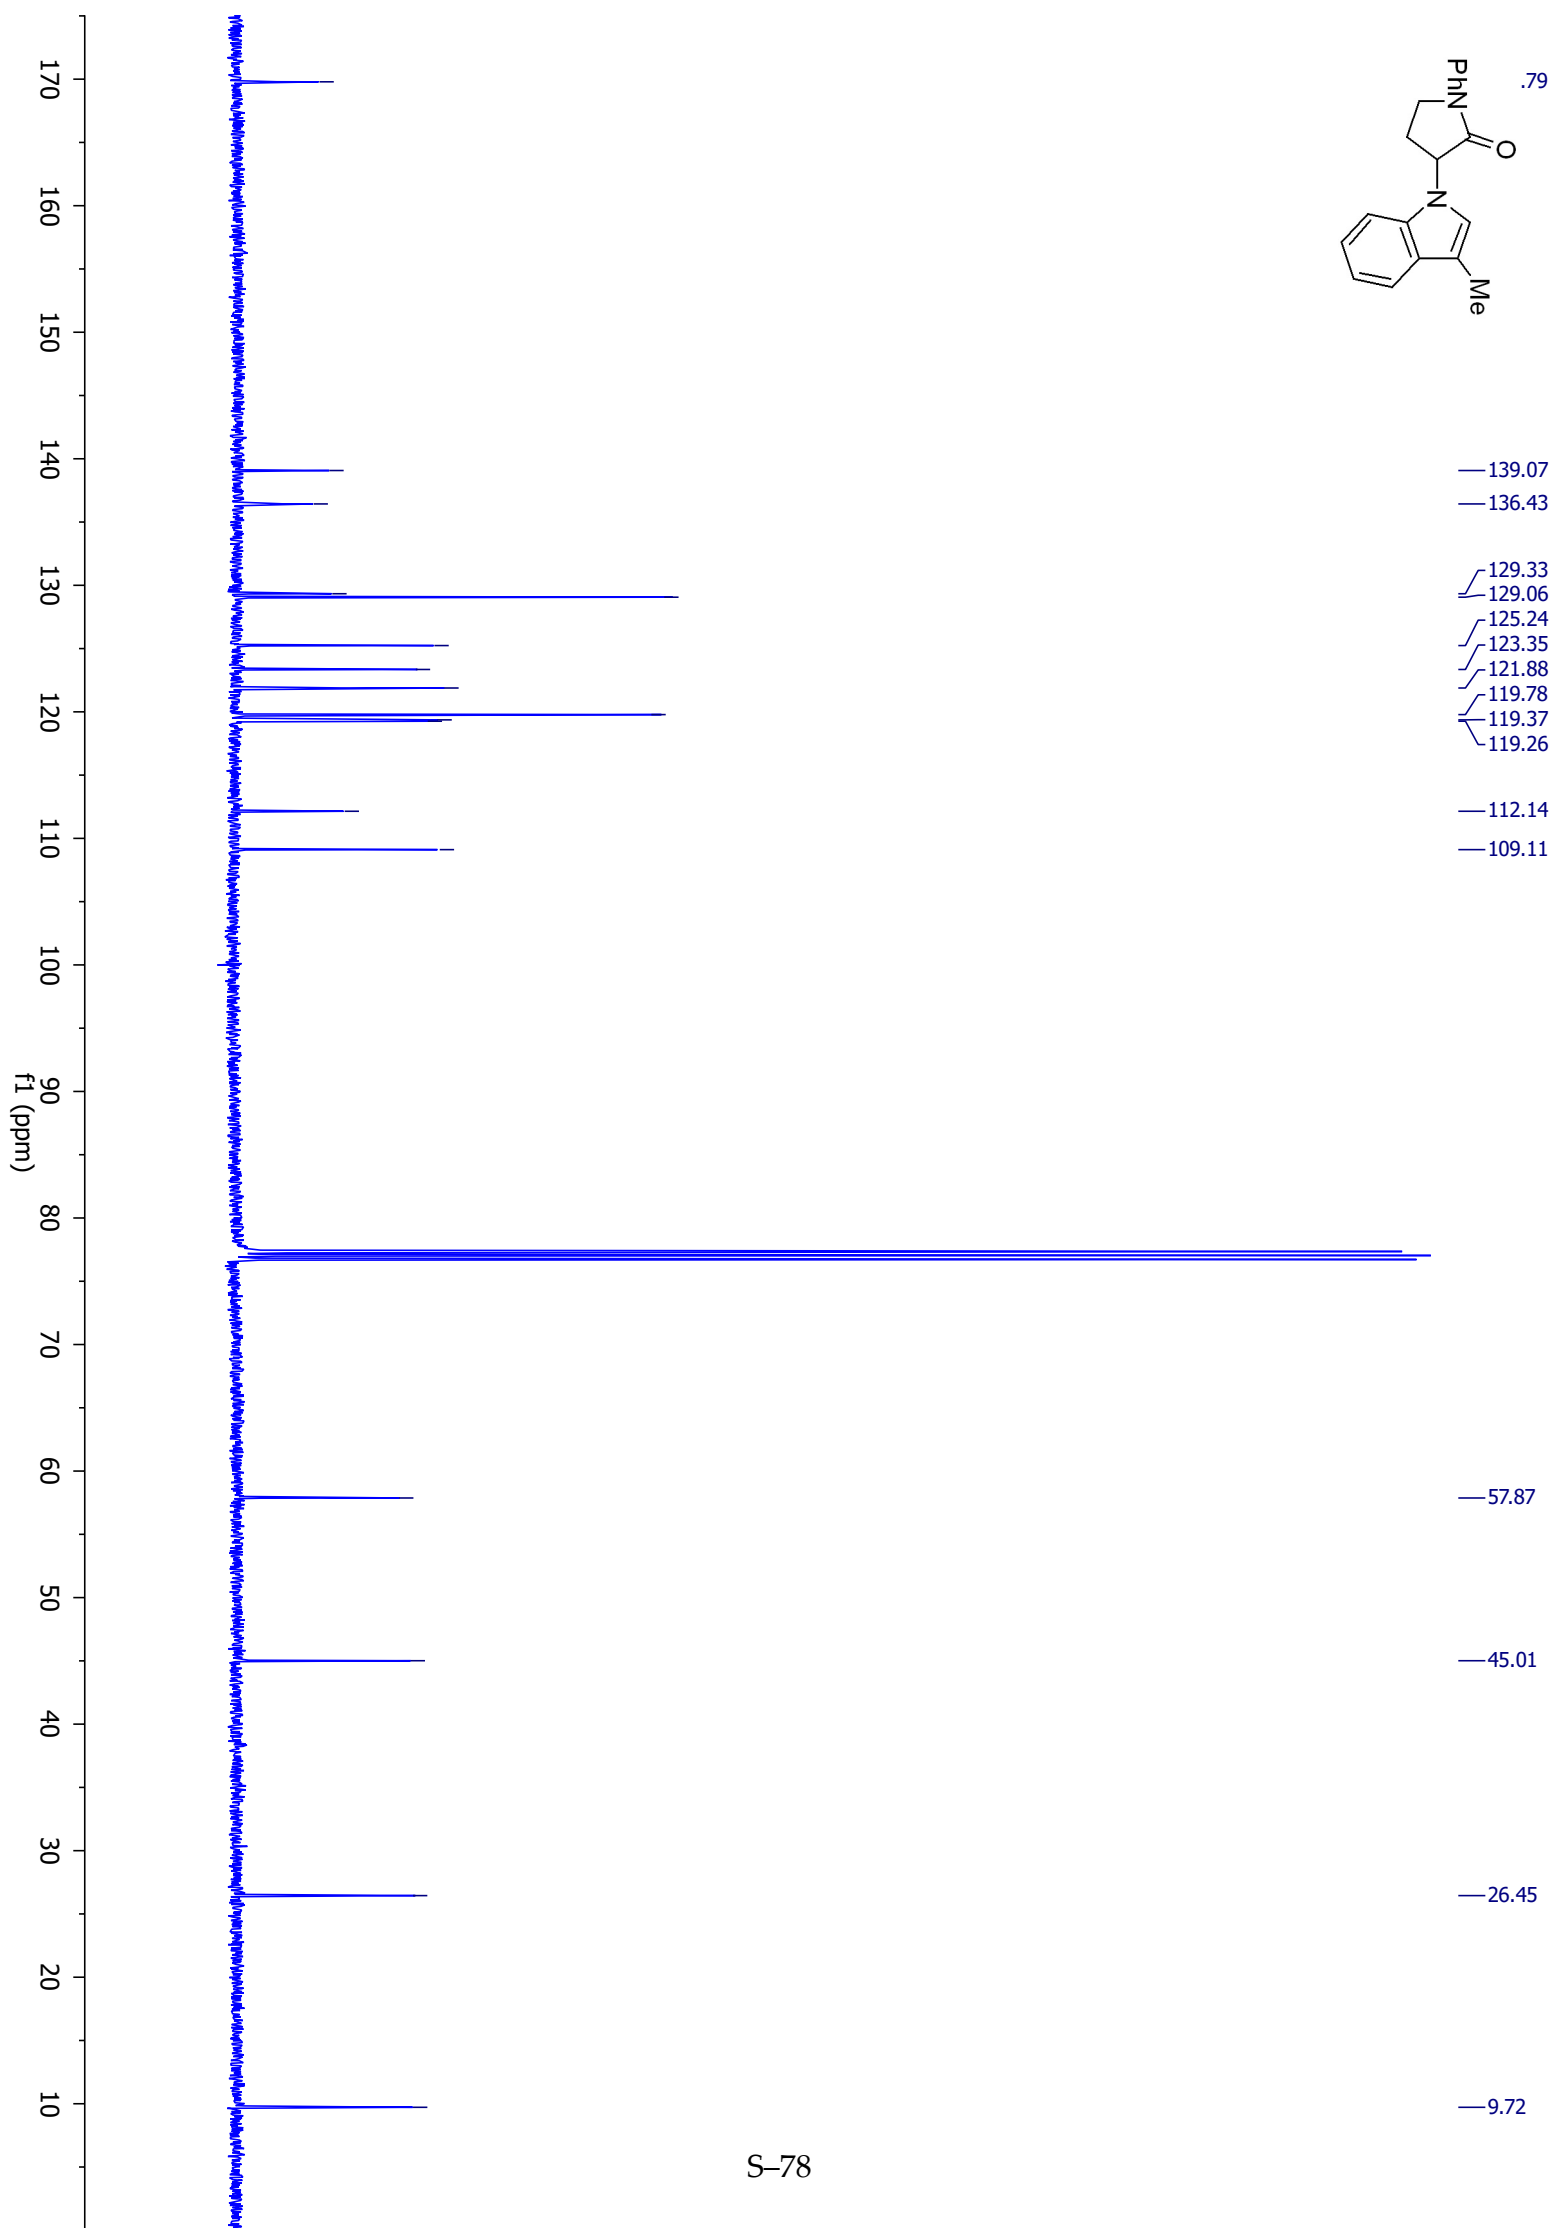

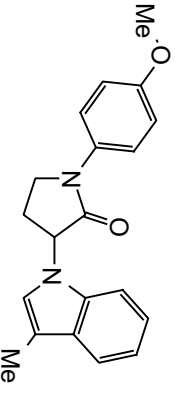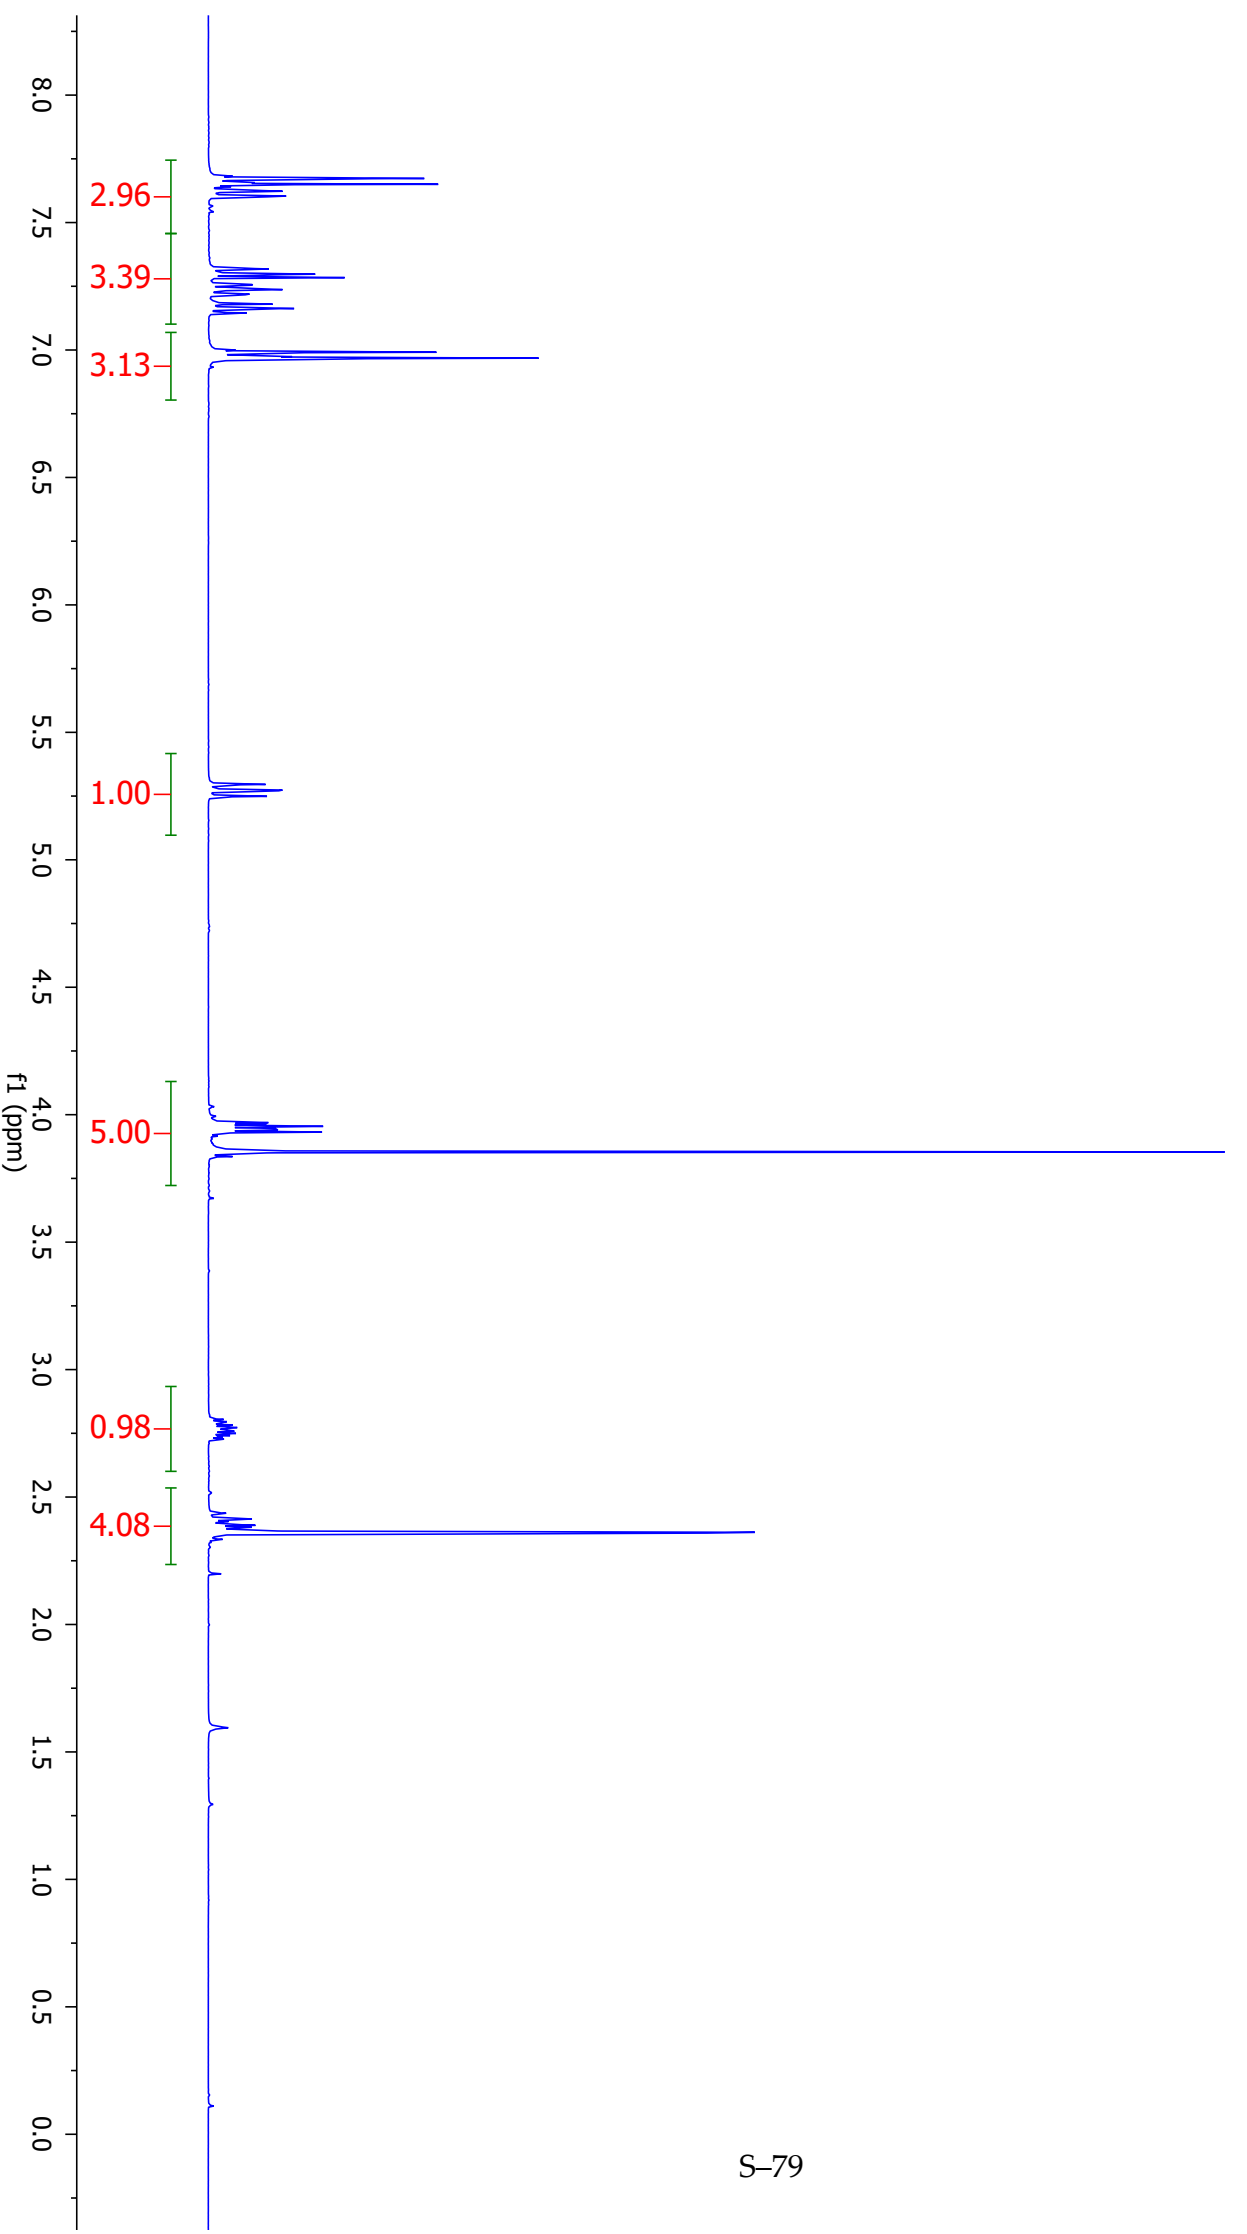

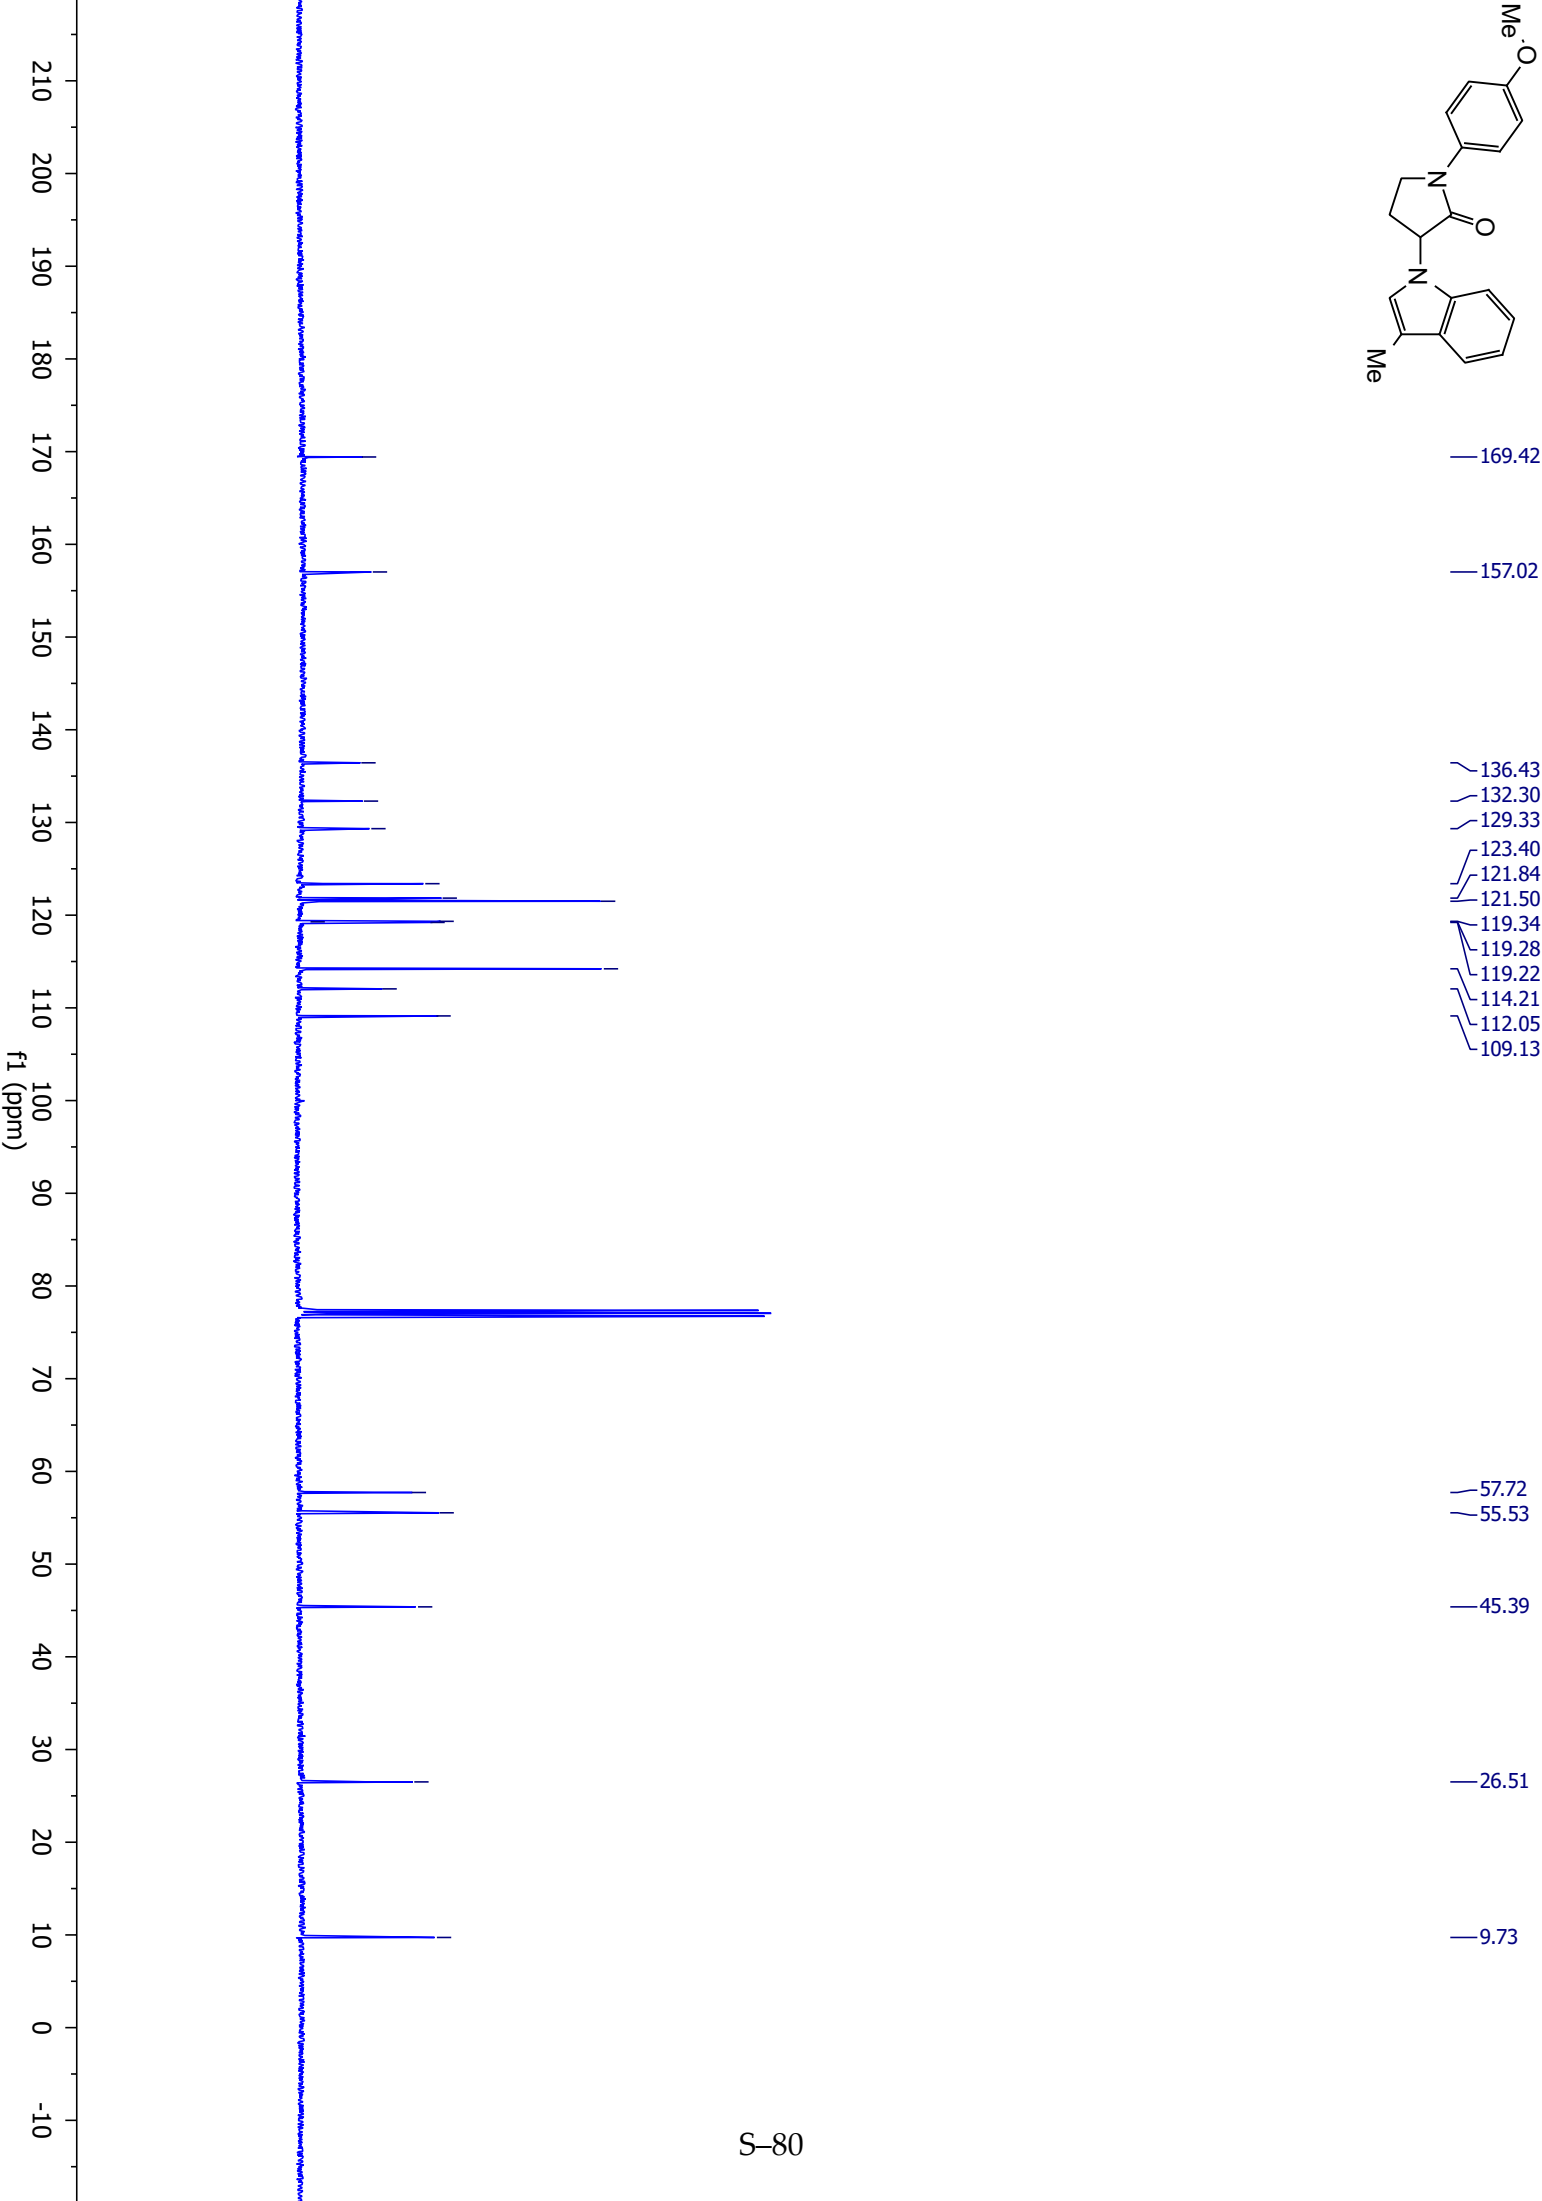



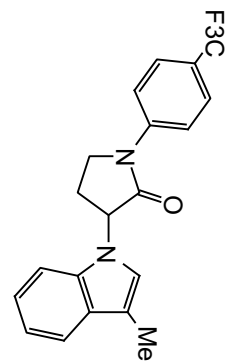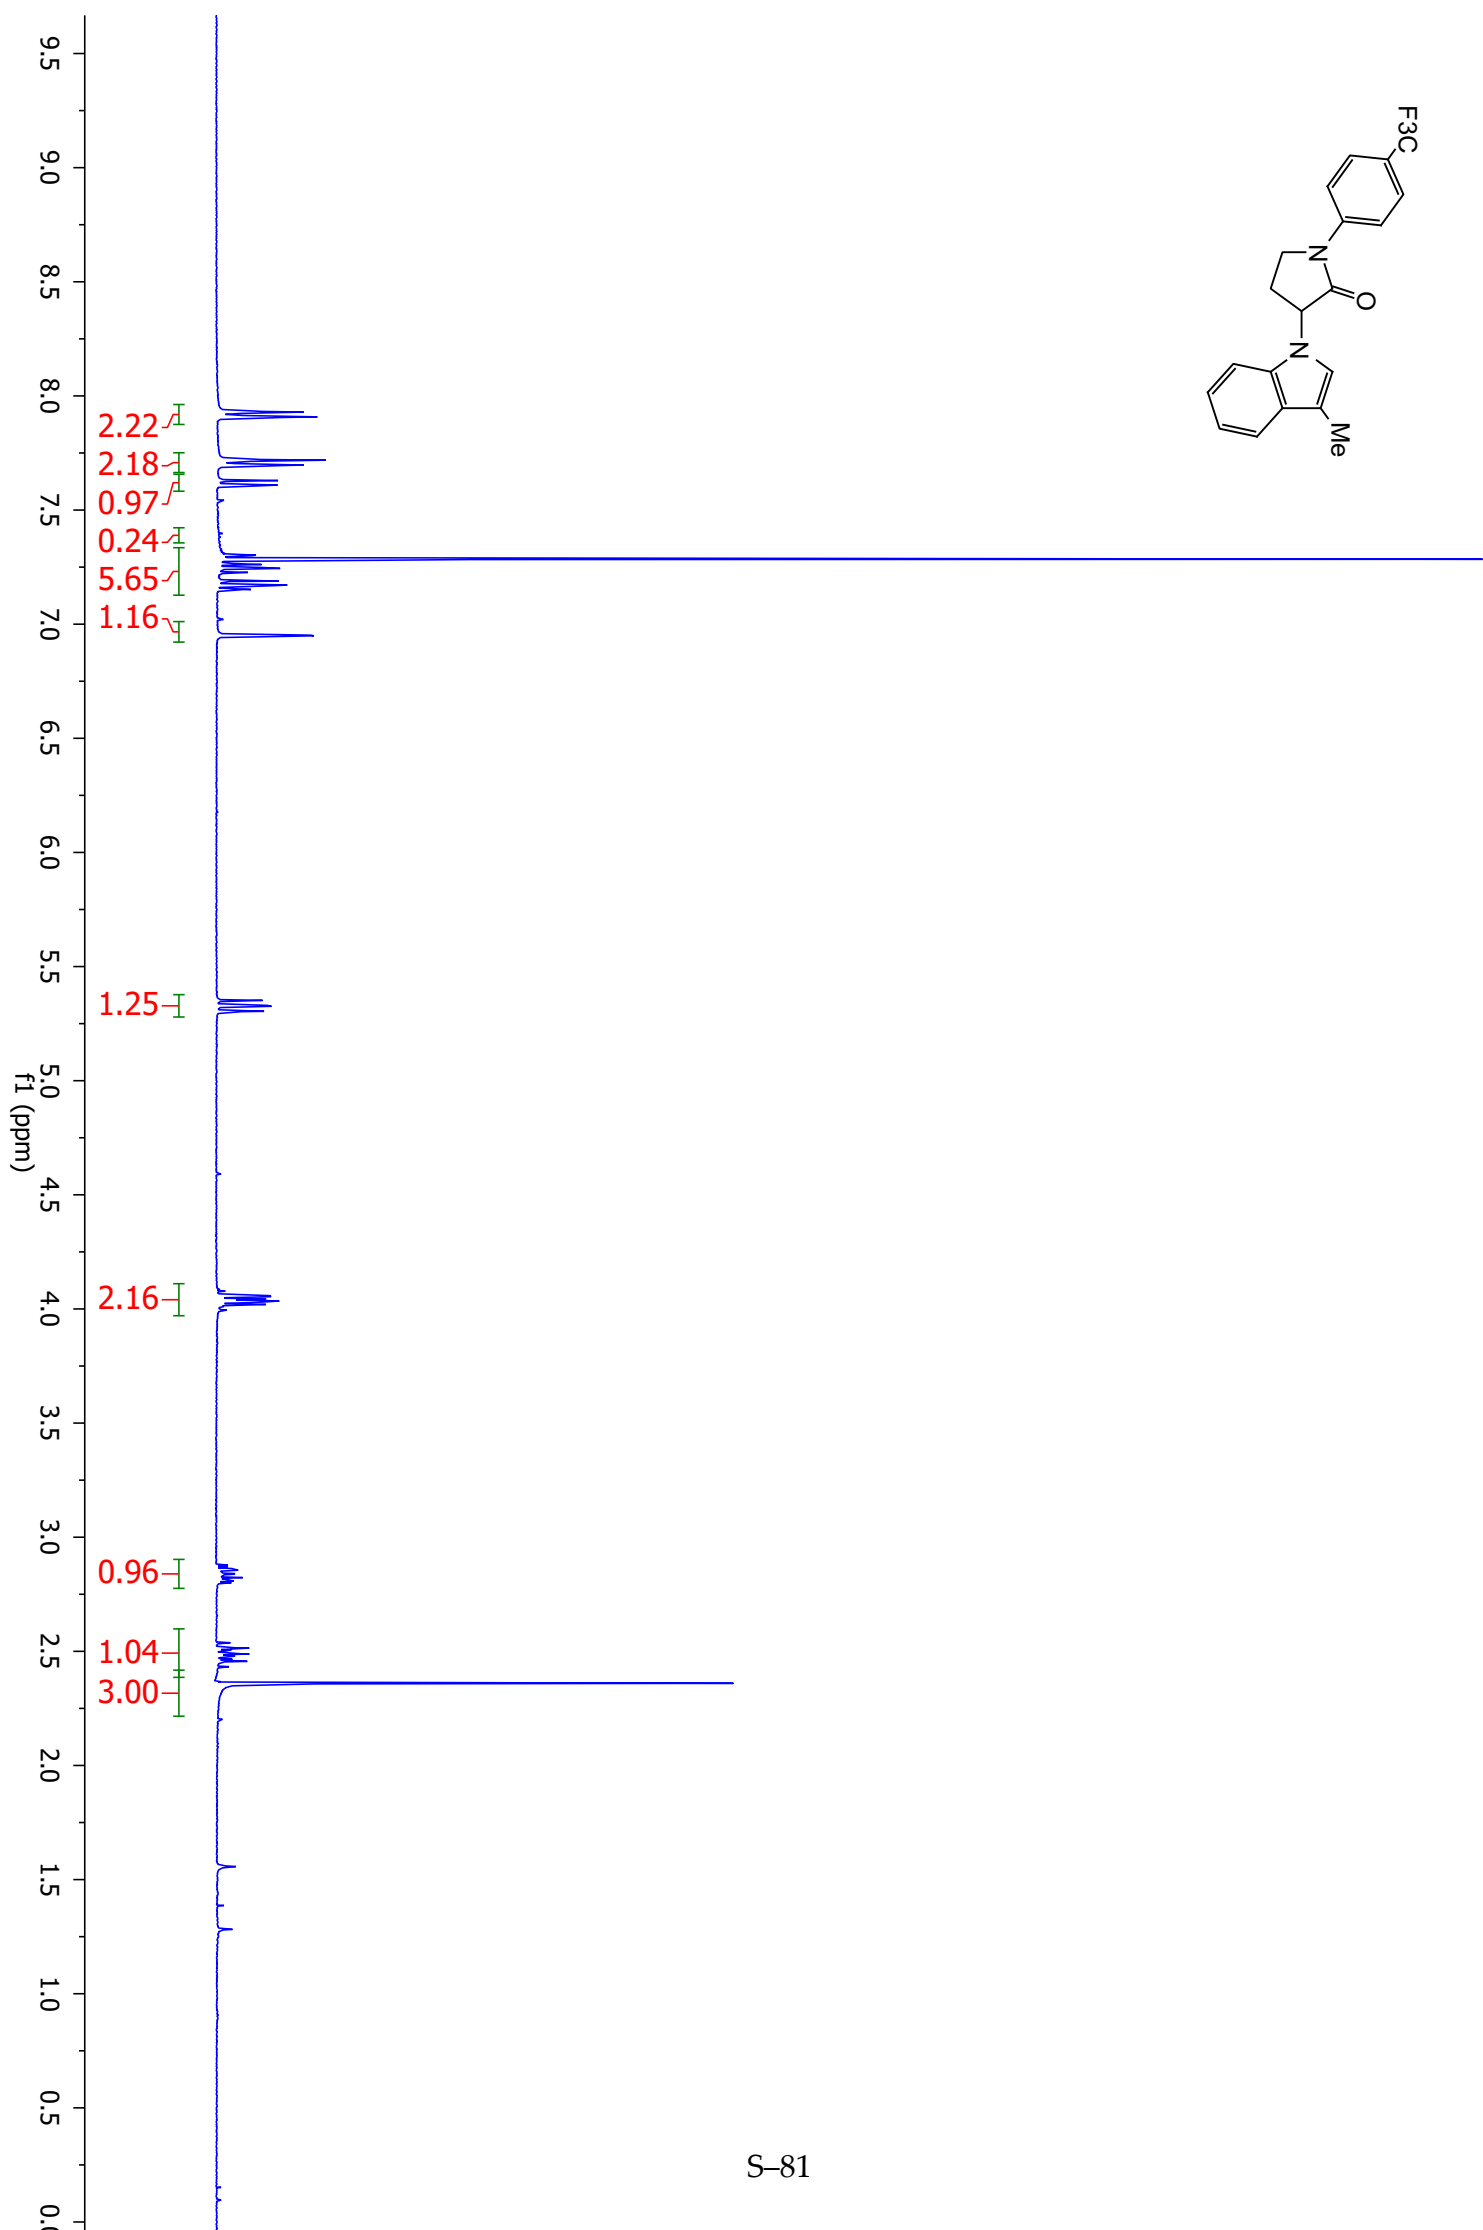

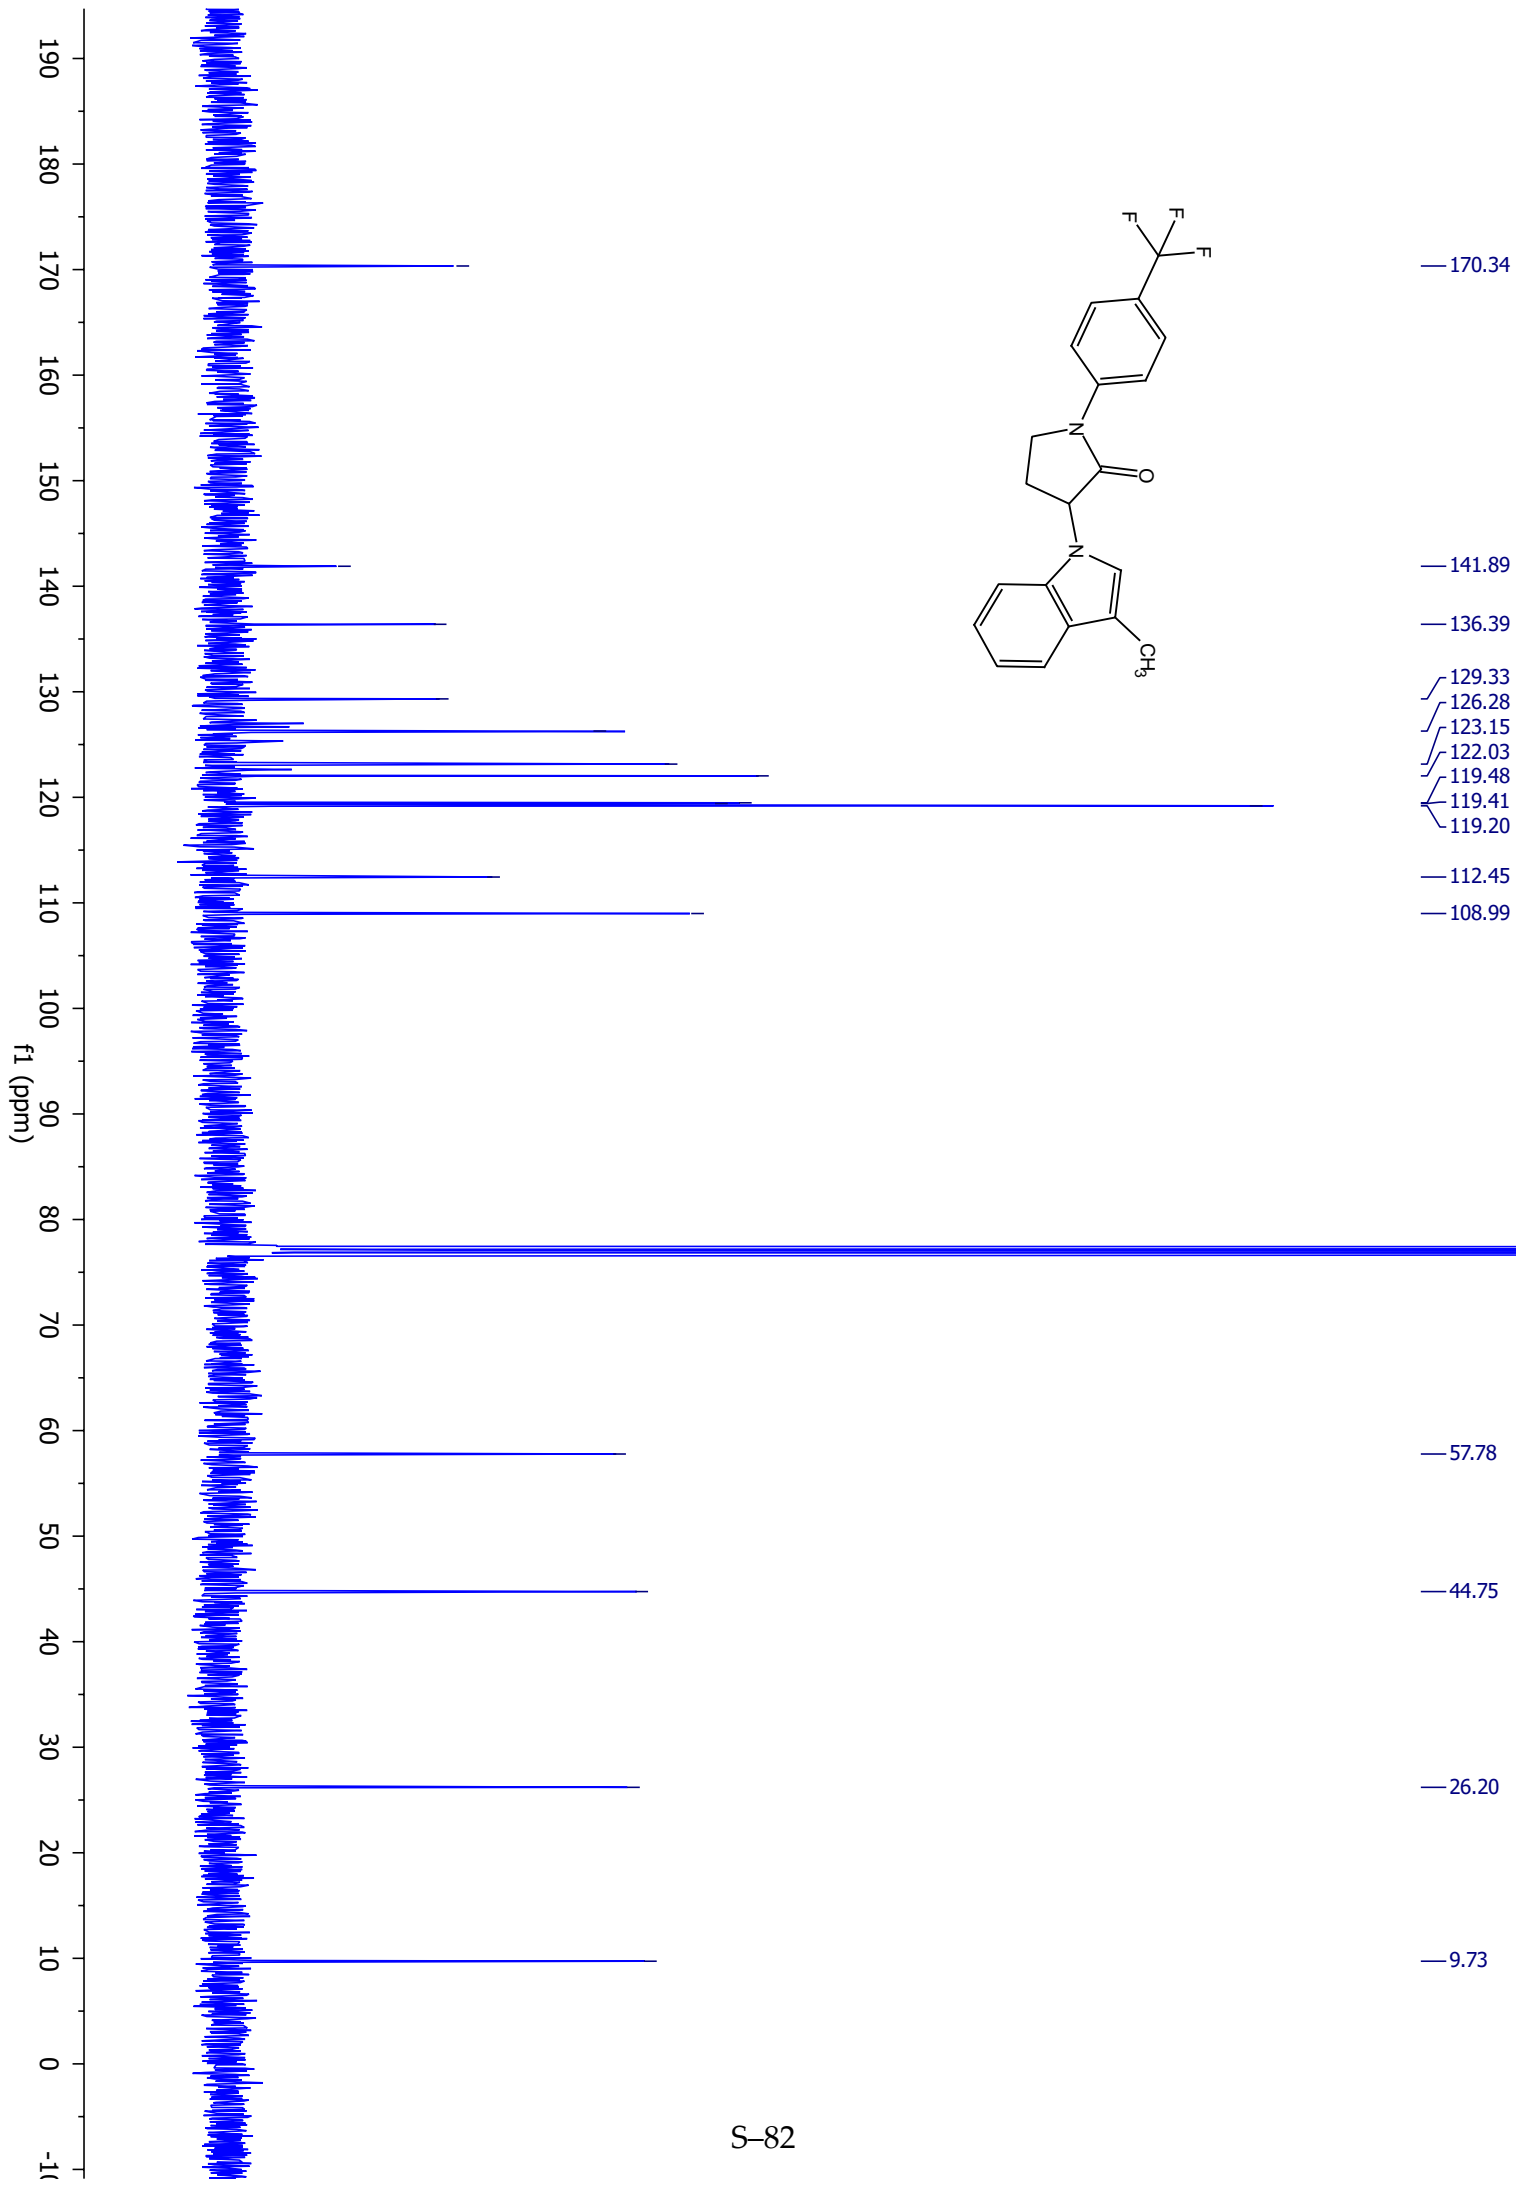

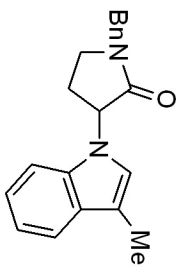

8.0  
7.5  
7.0  
6.5  
6.0  
5.5  
5.0  
4.5  
4.0  
3.5  
3.0  
2.5  
2.0  
1.5  
1.0  
0.5  
0.0

f1 (ppm)

0.97  
5.05  
1.96  
0.90  
0.98  
1.00  
0.95  
1.05  
2.04  
1.00  
2.88  
0.97

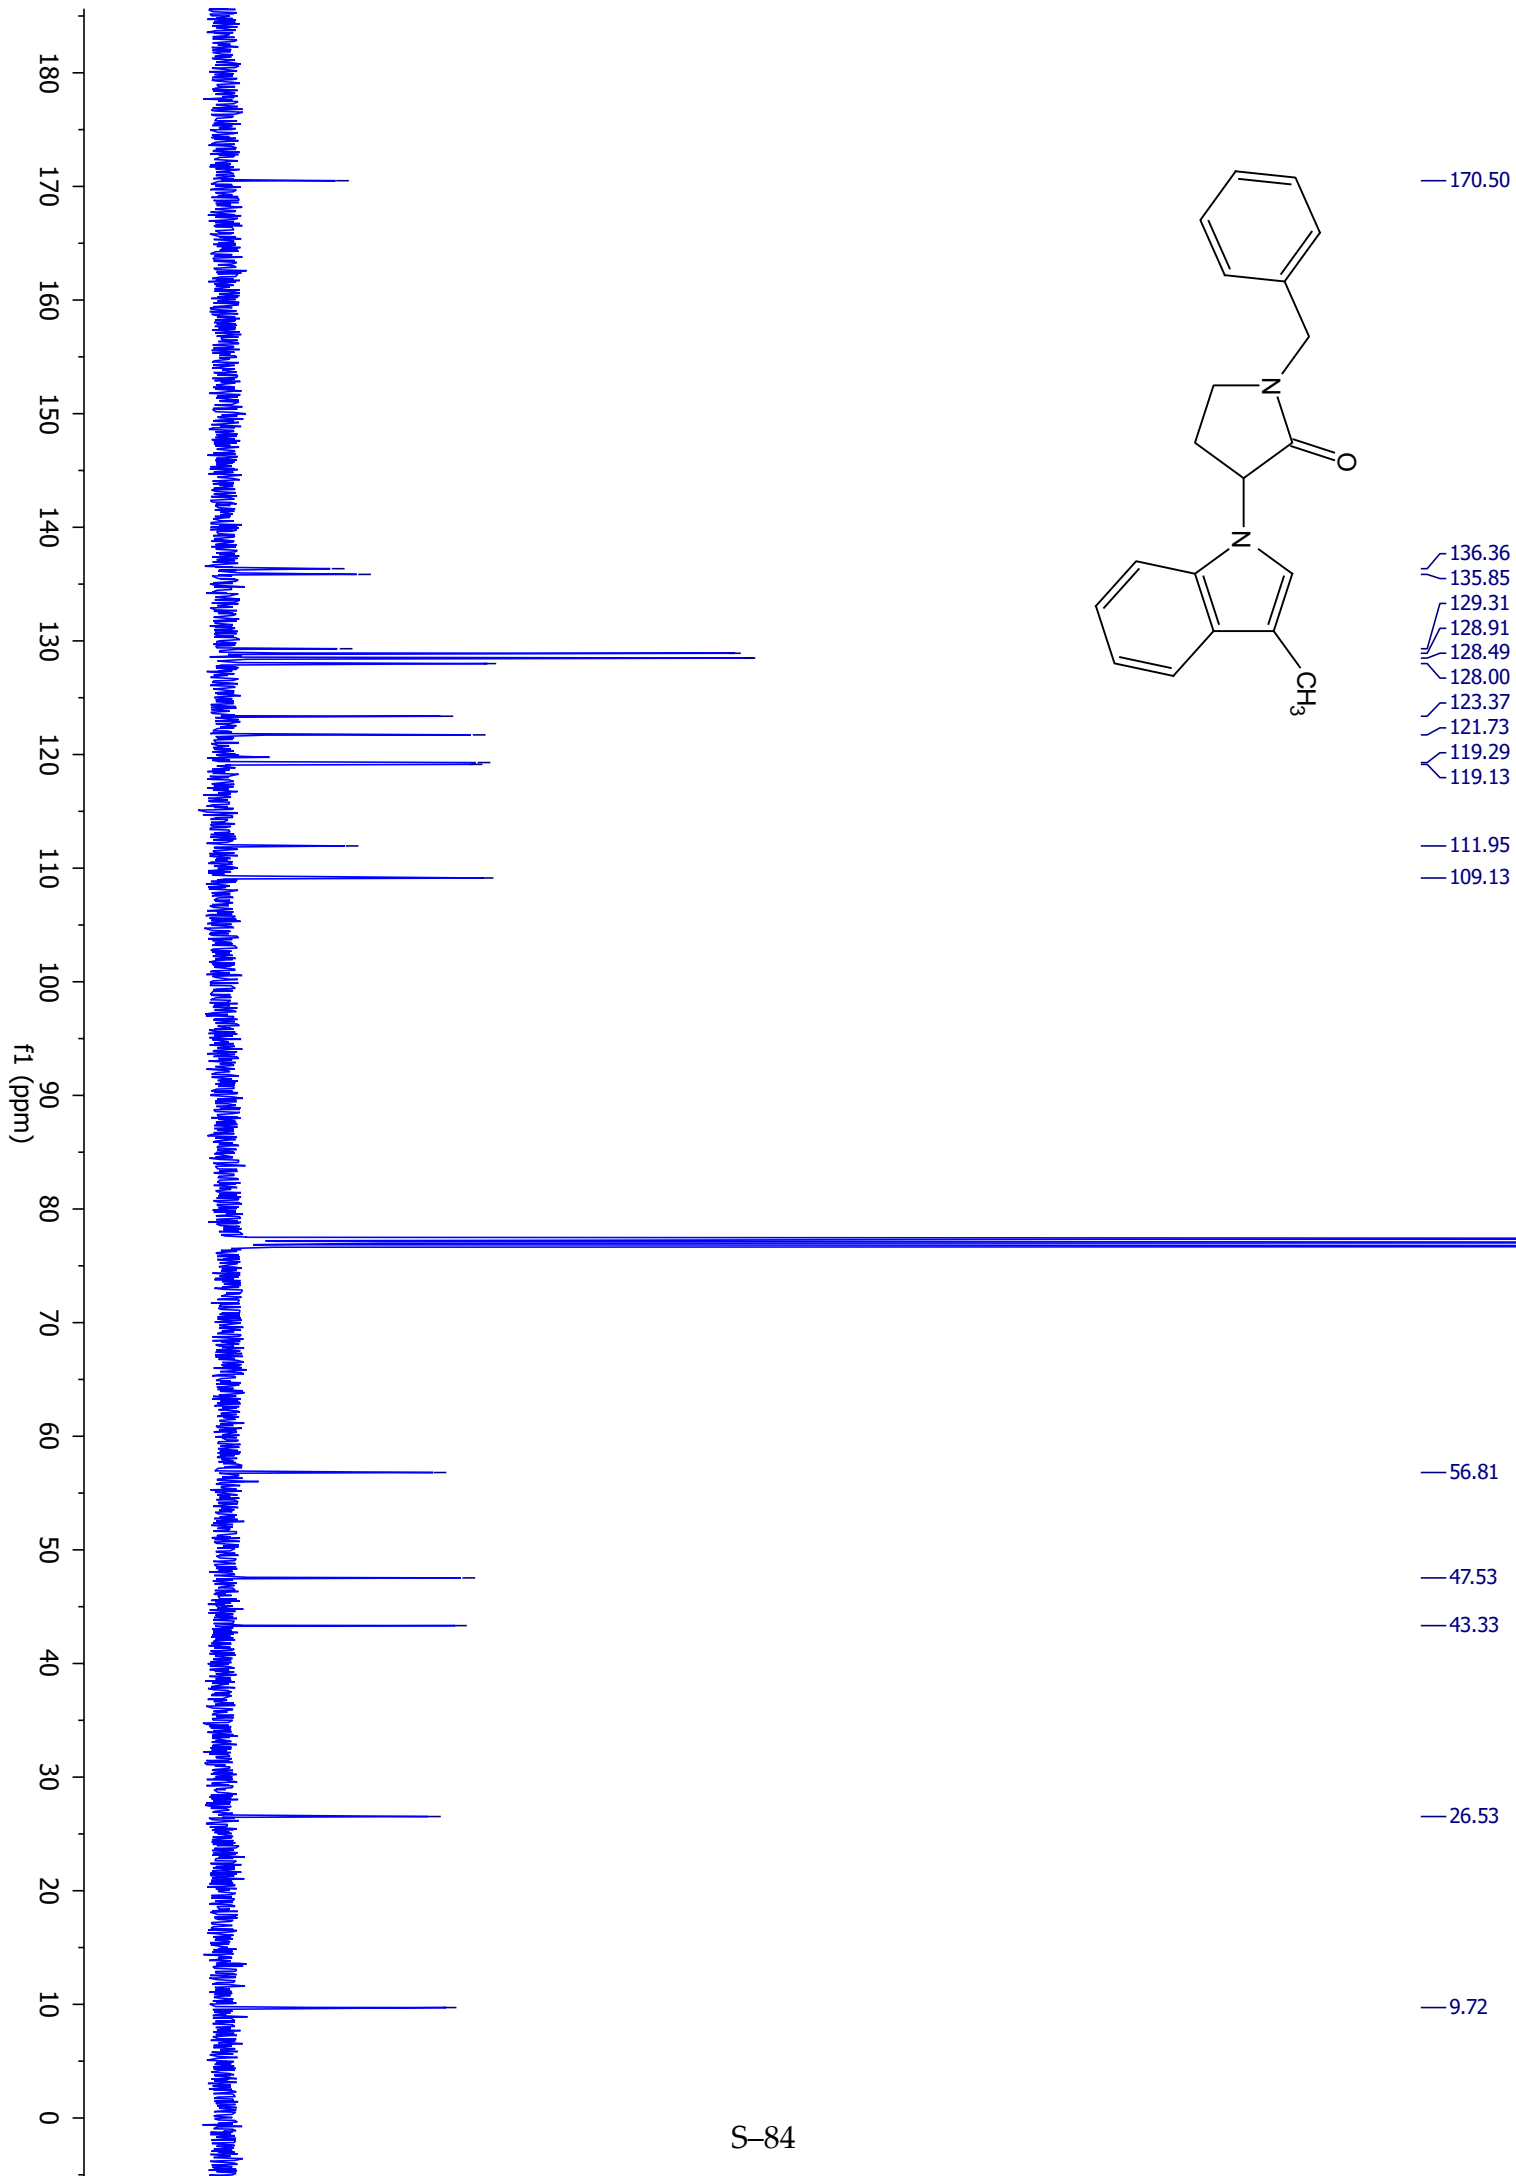

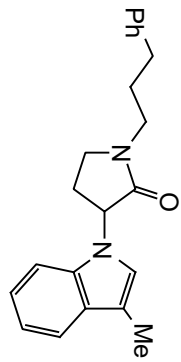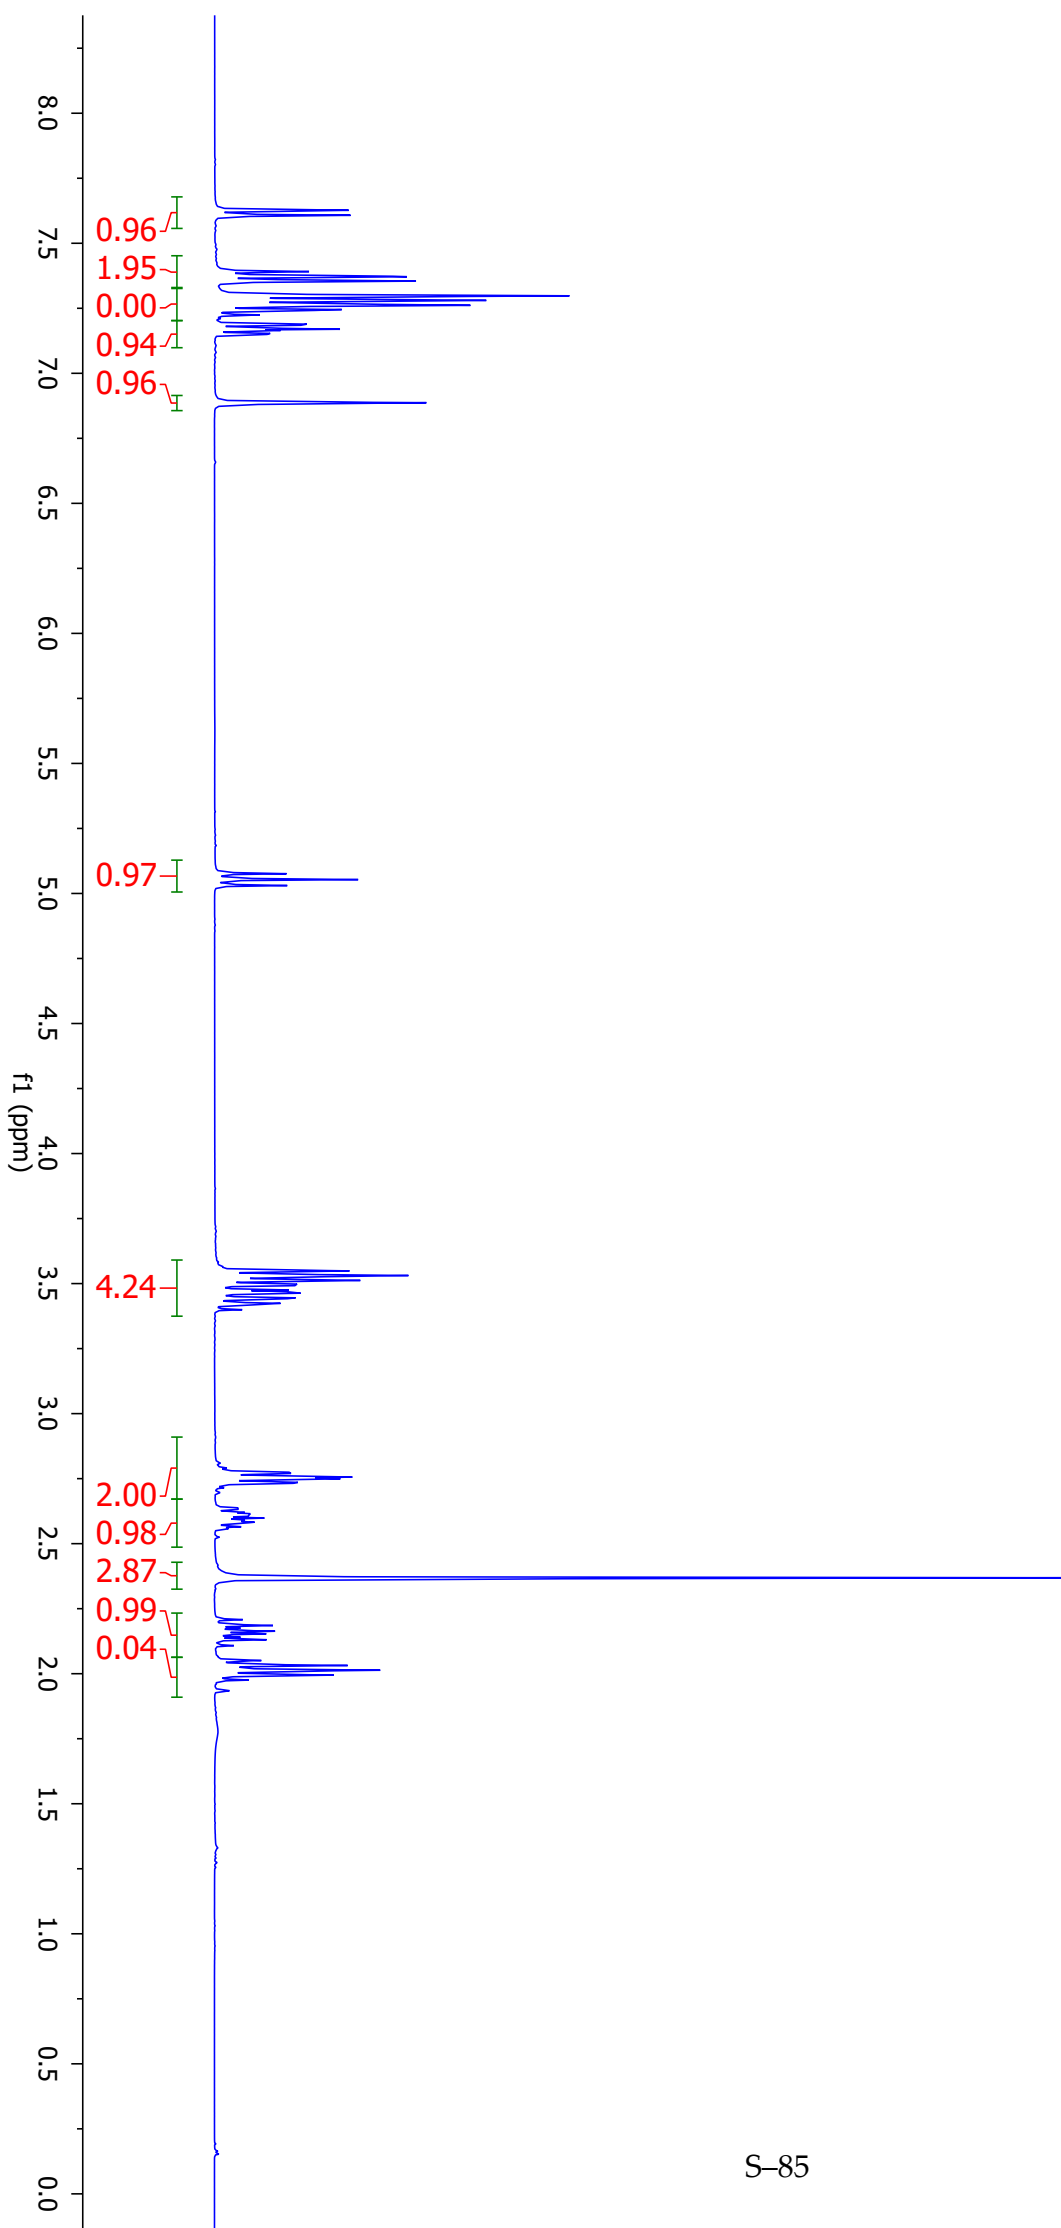

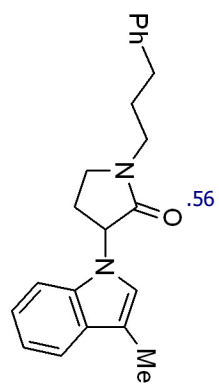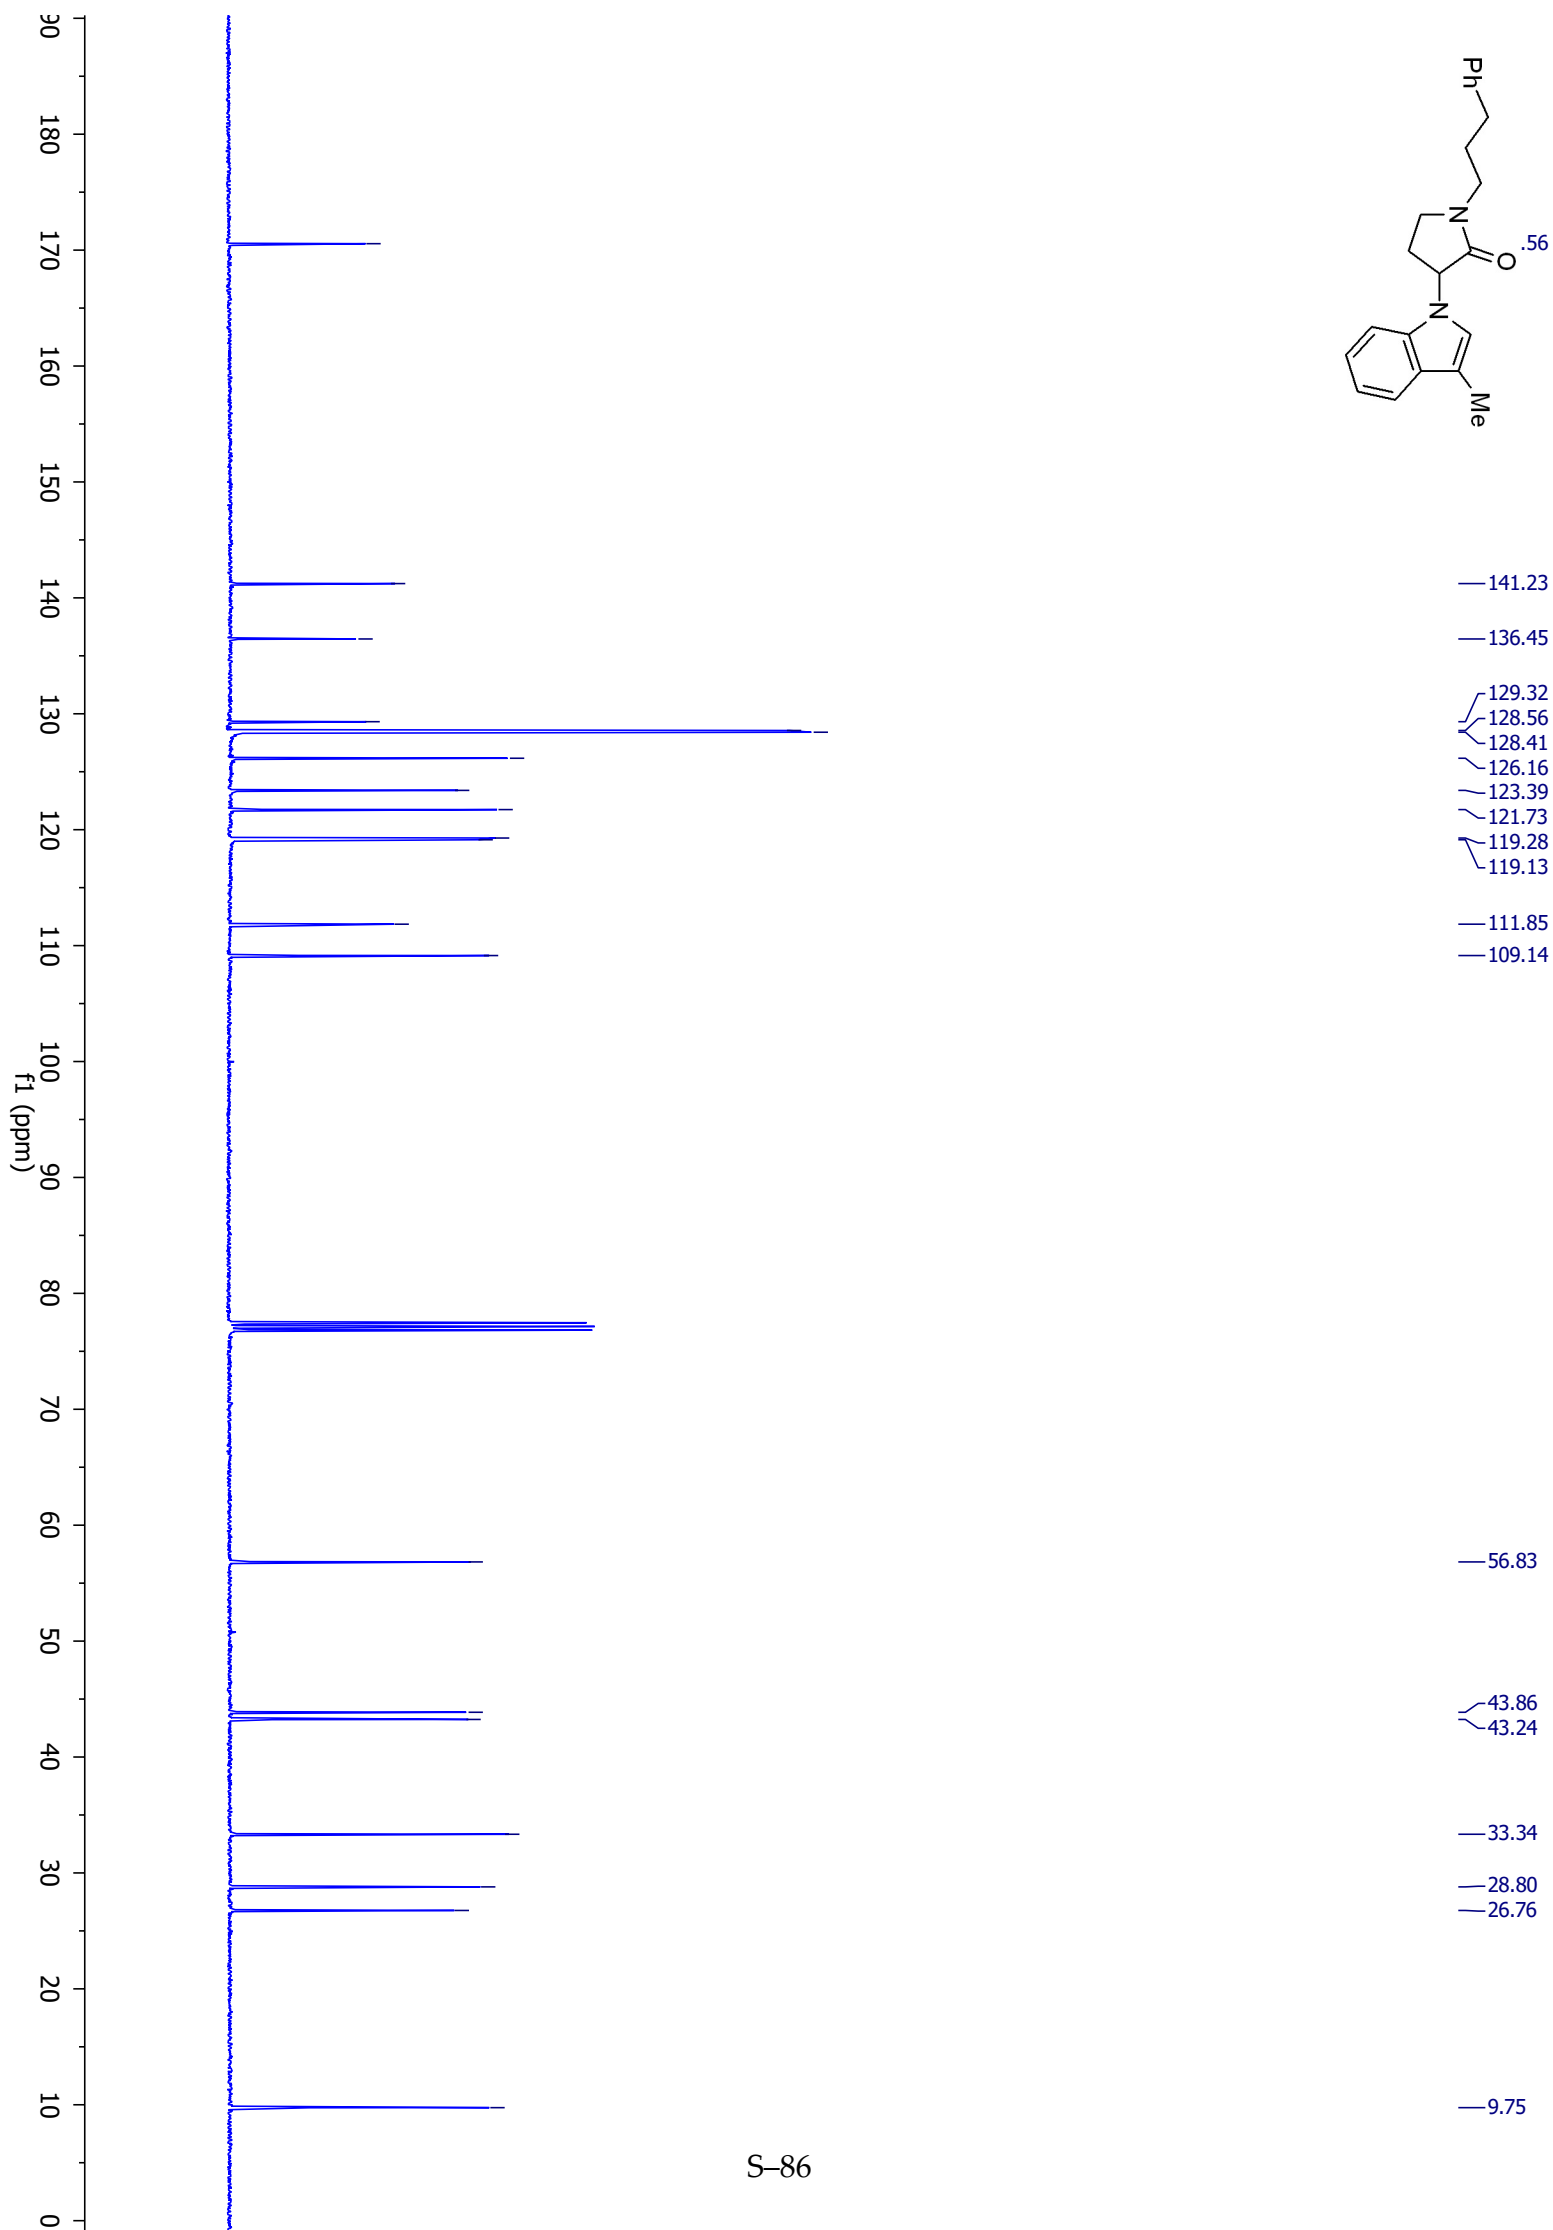

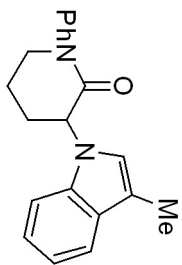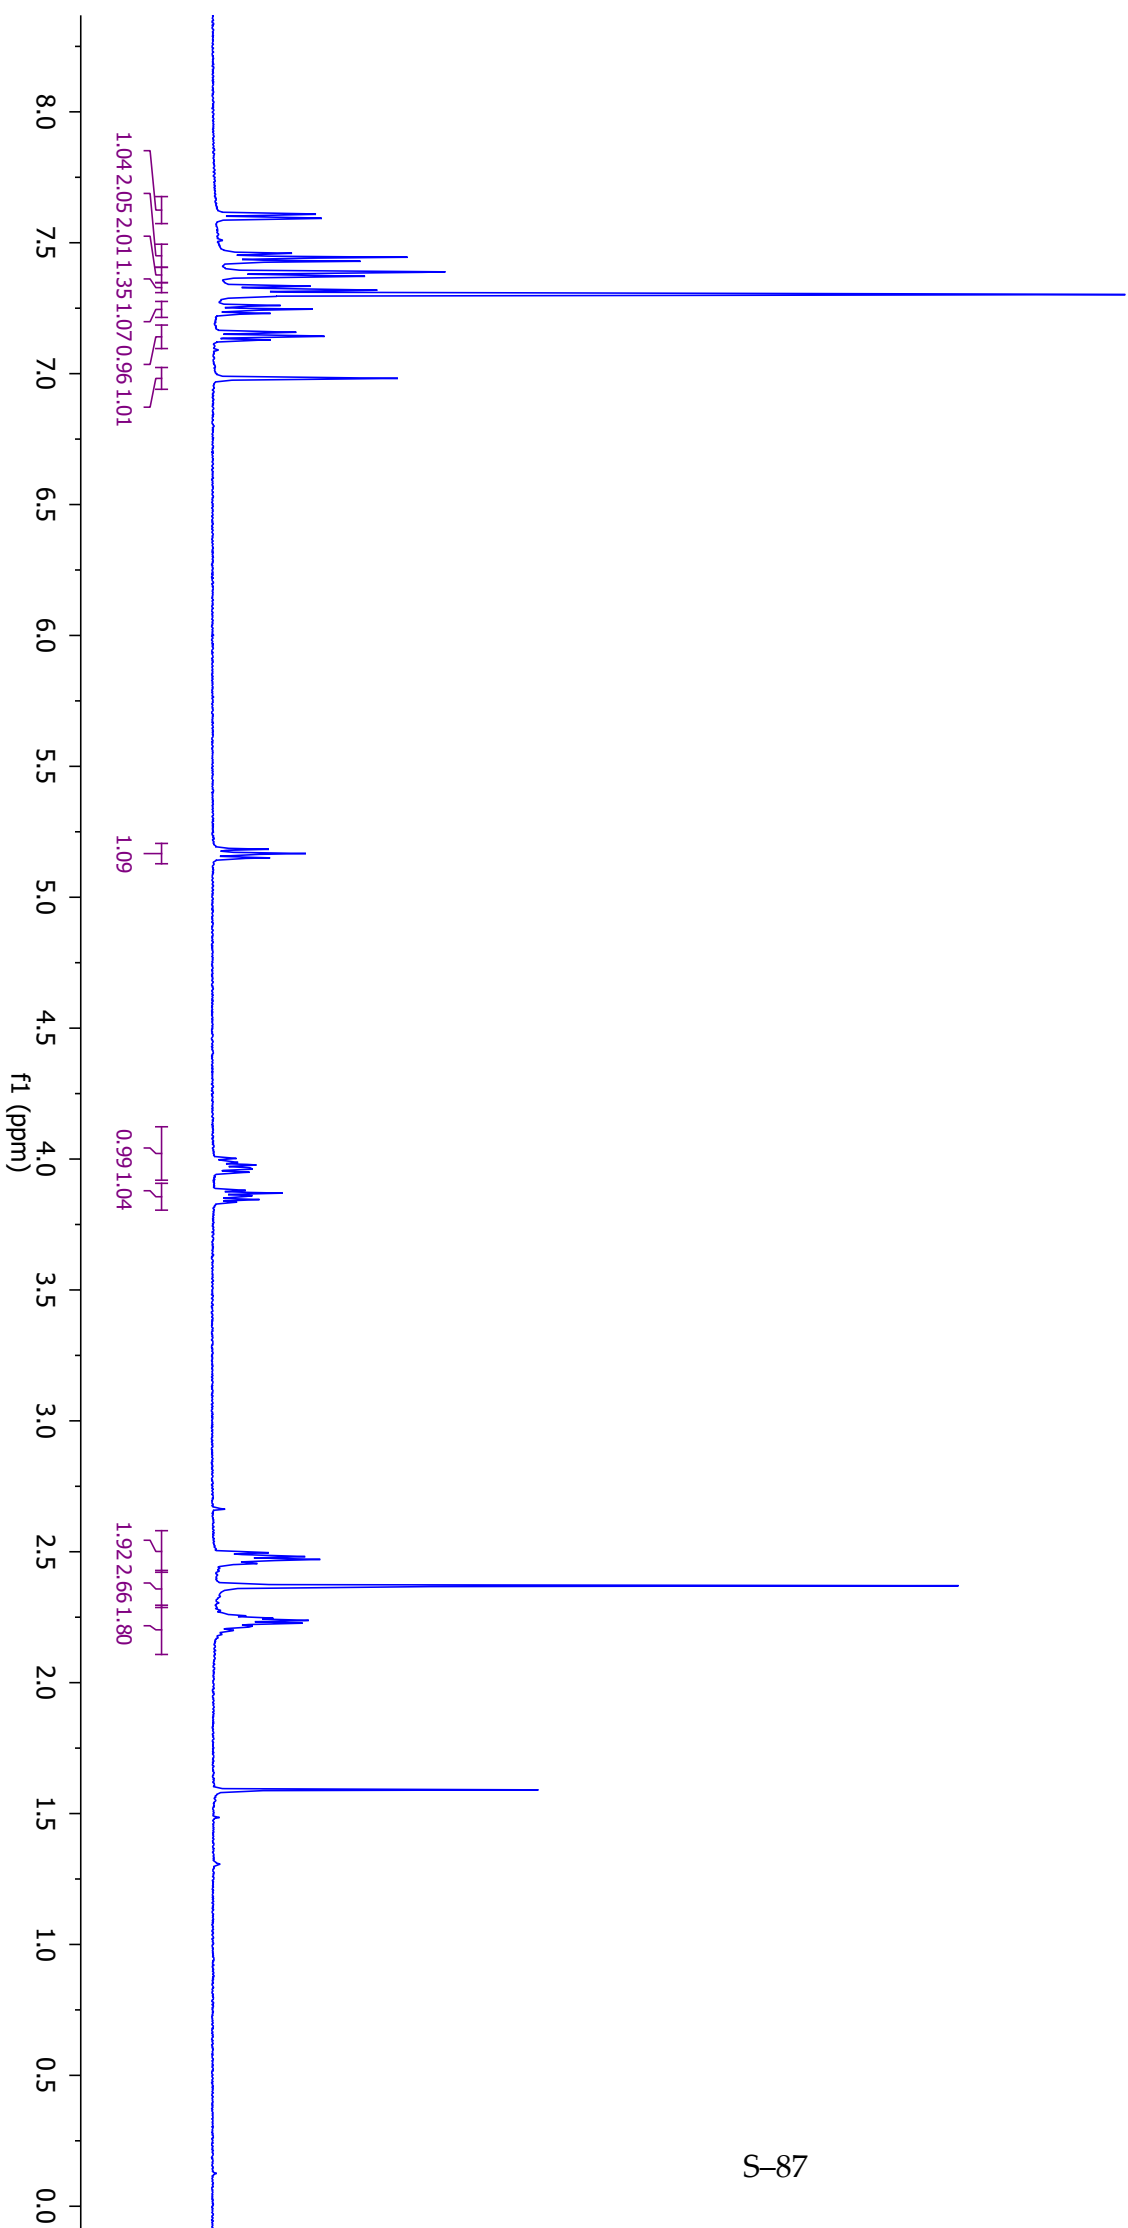

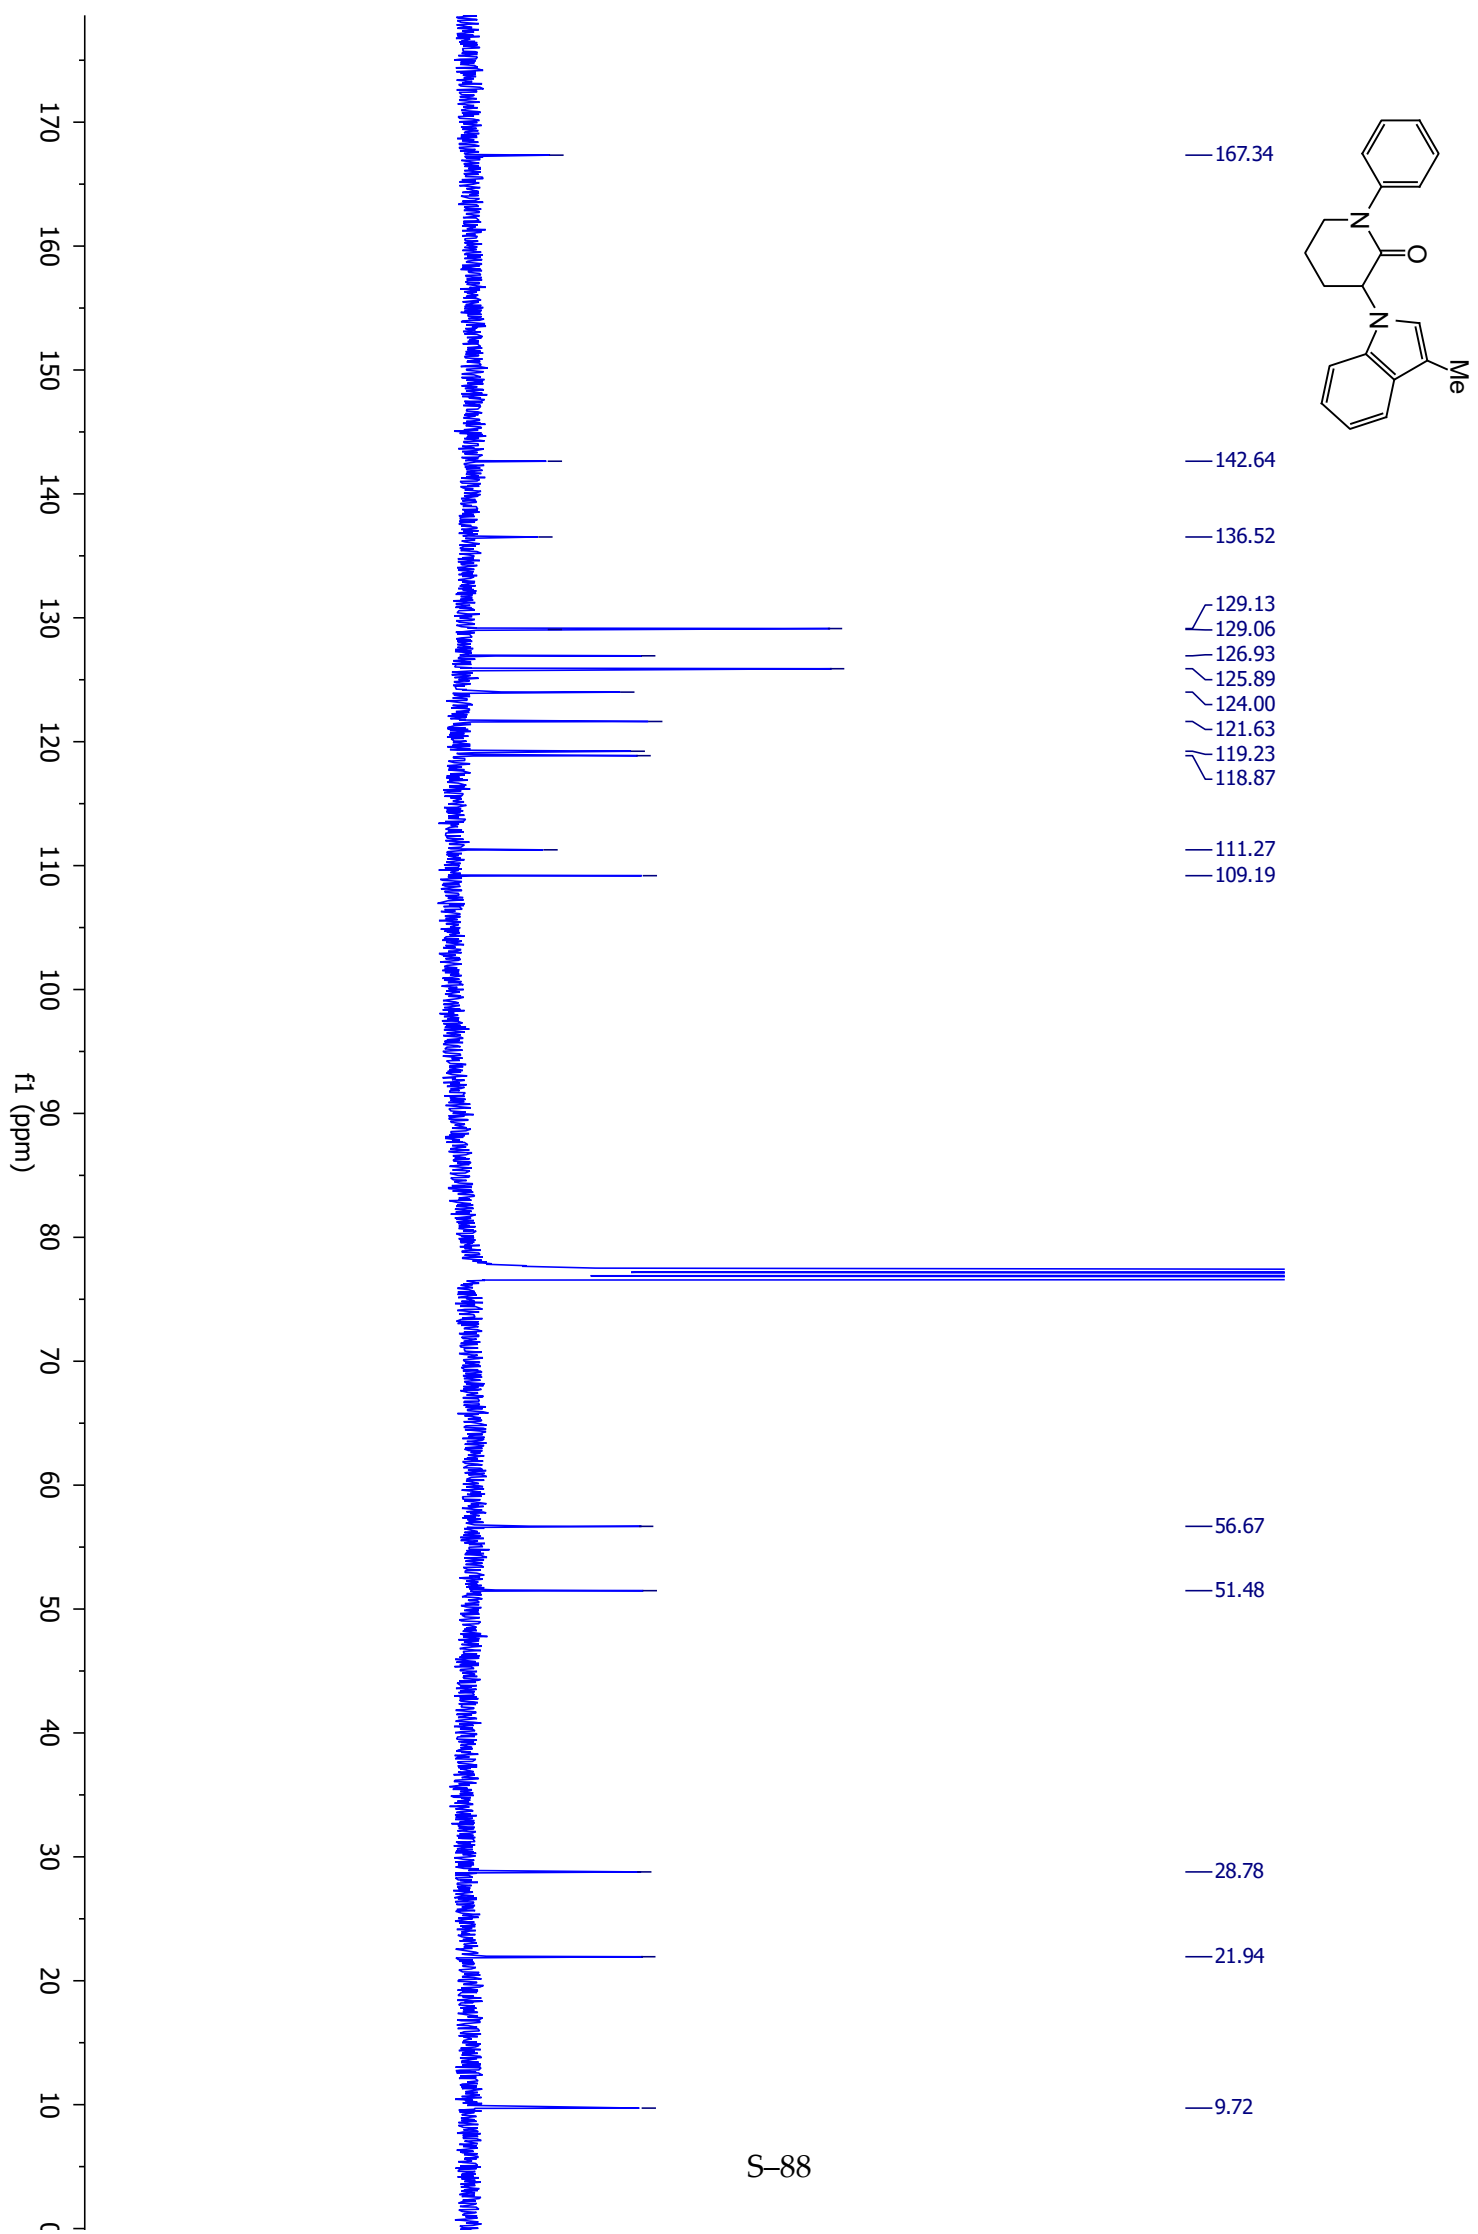



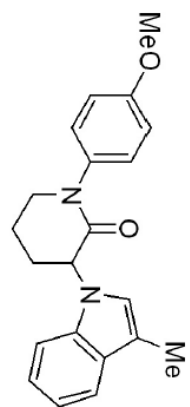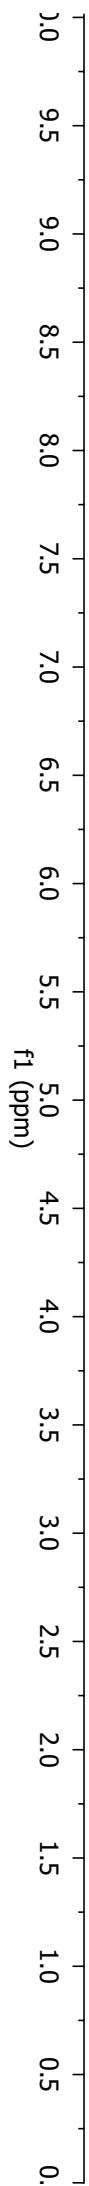

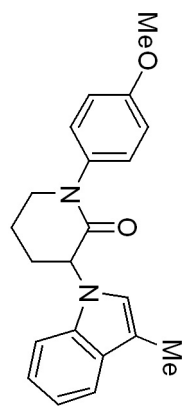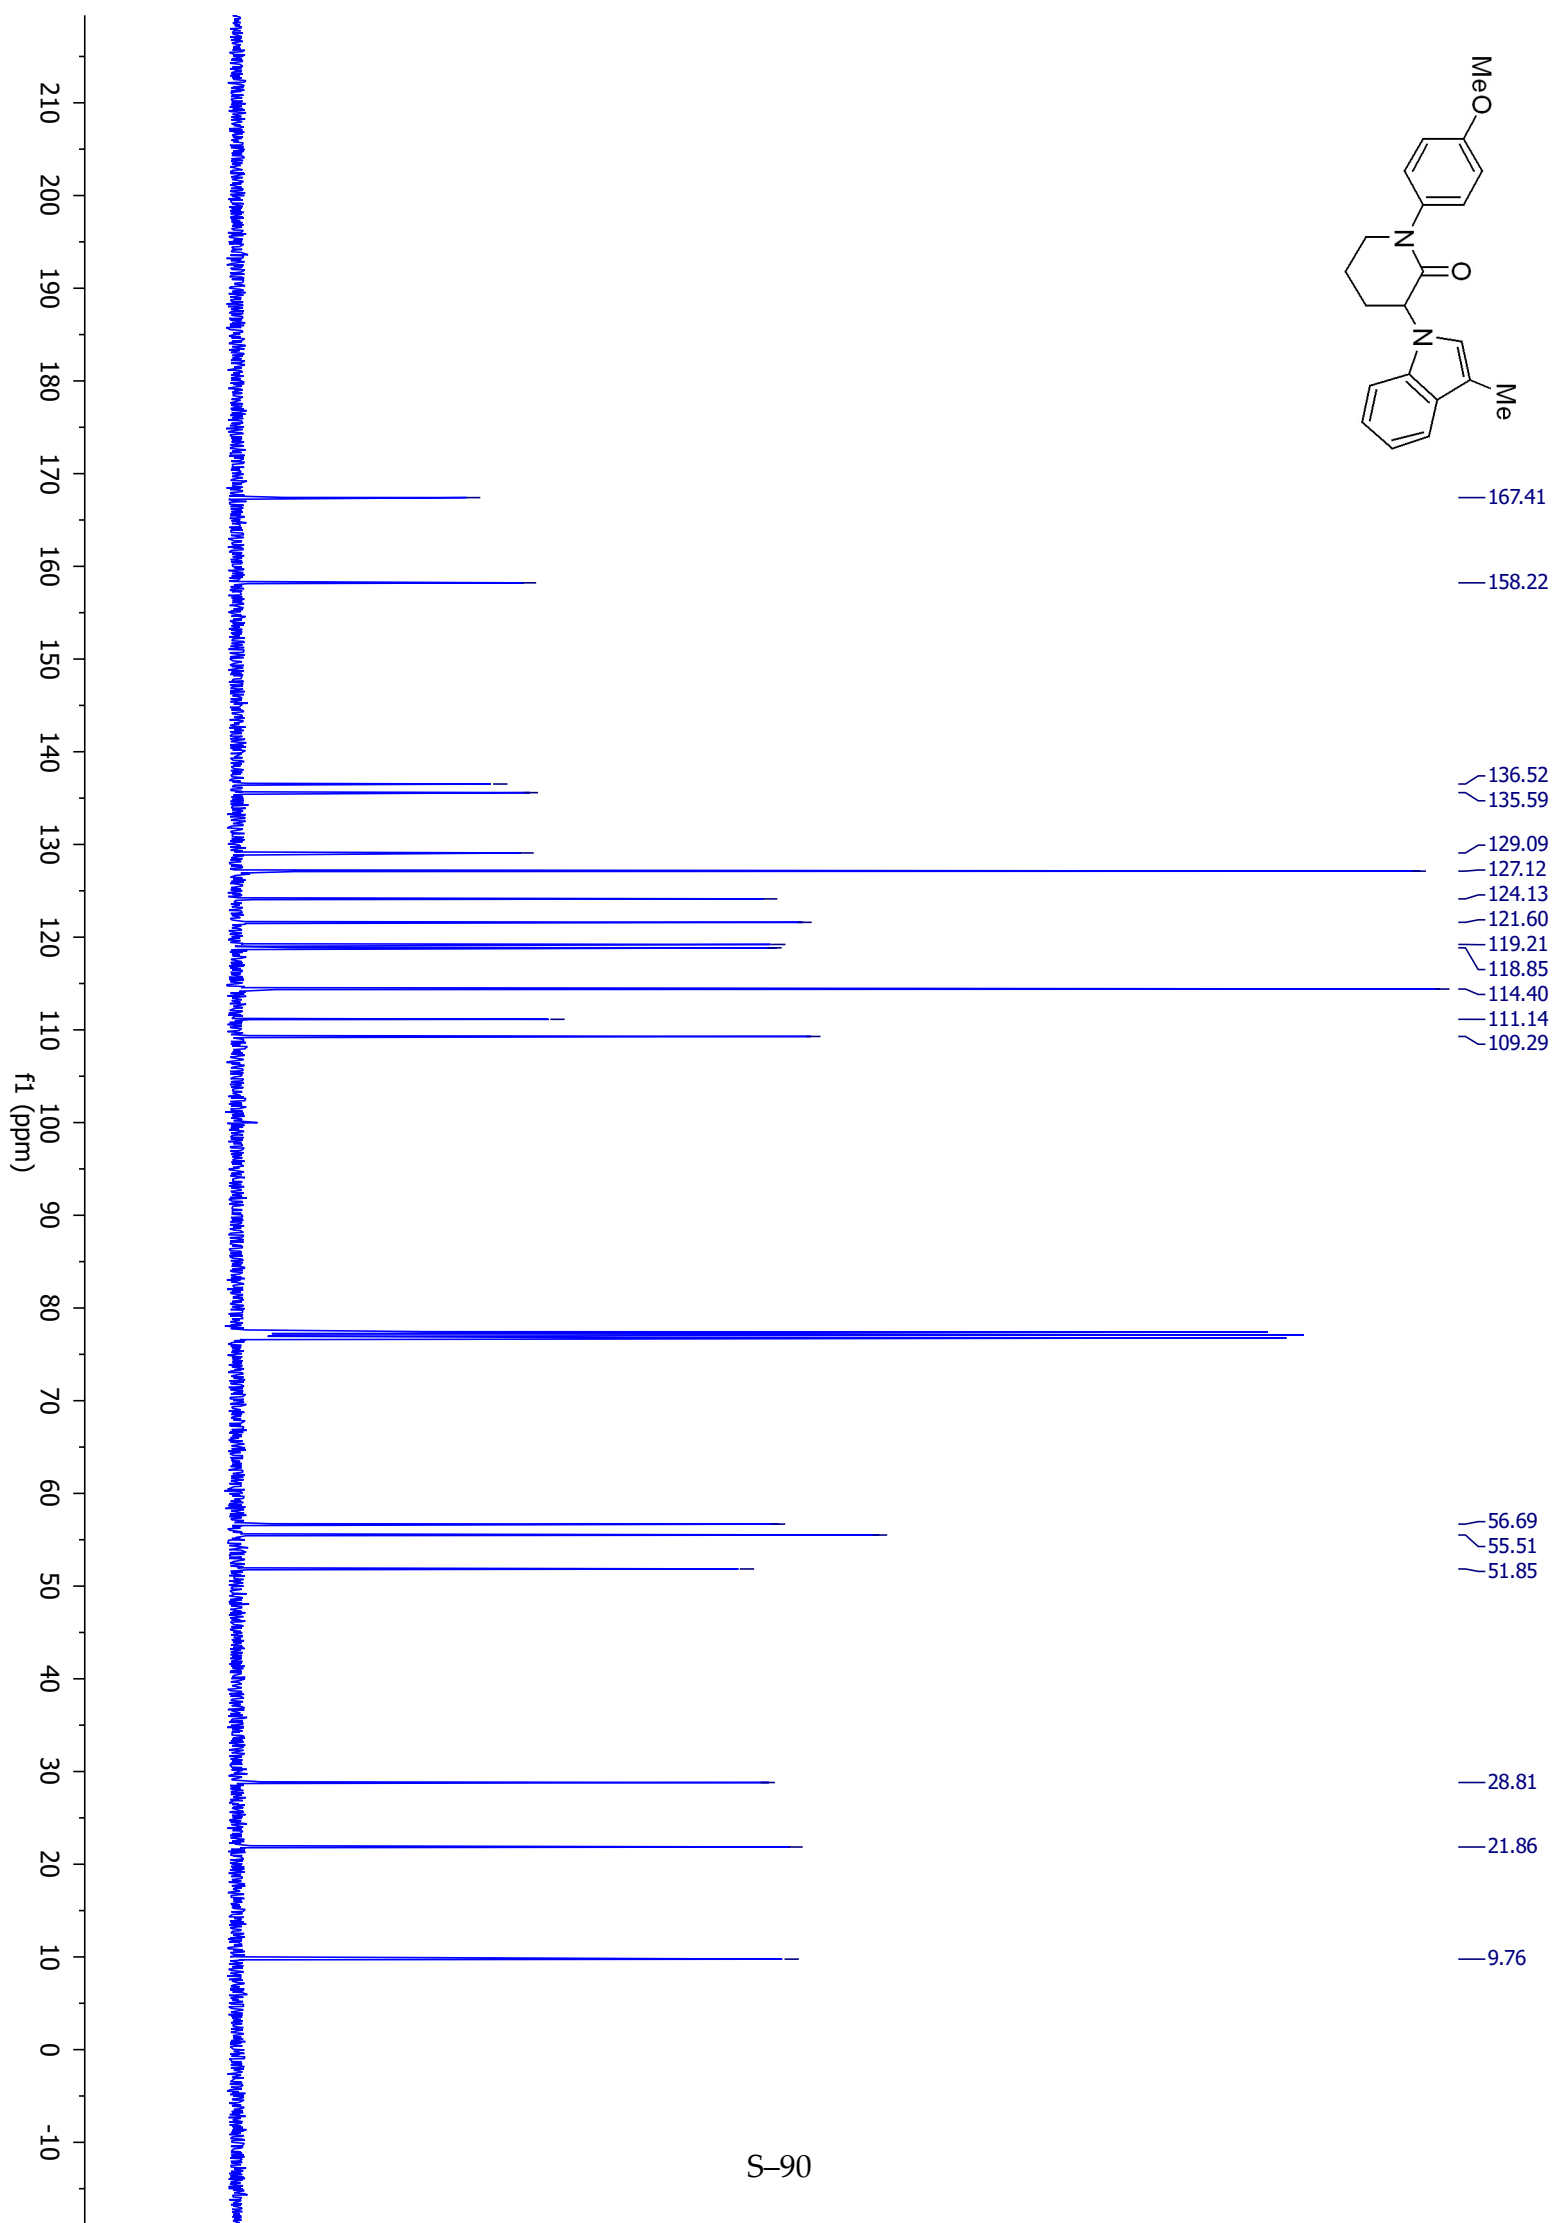

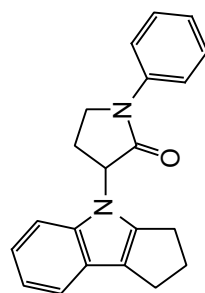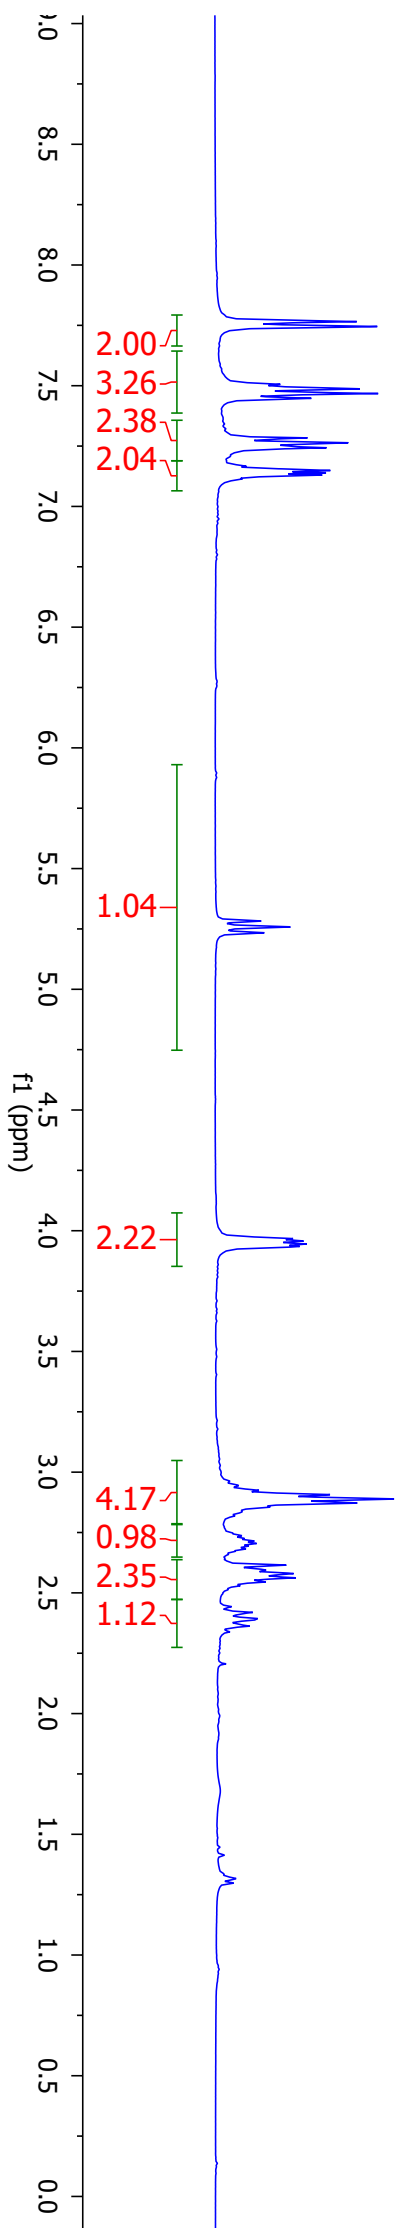

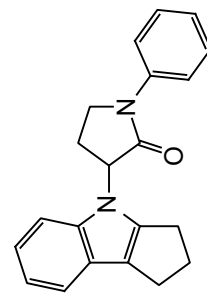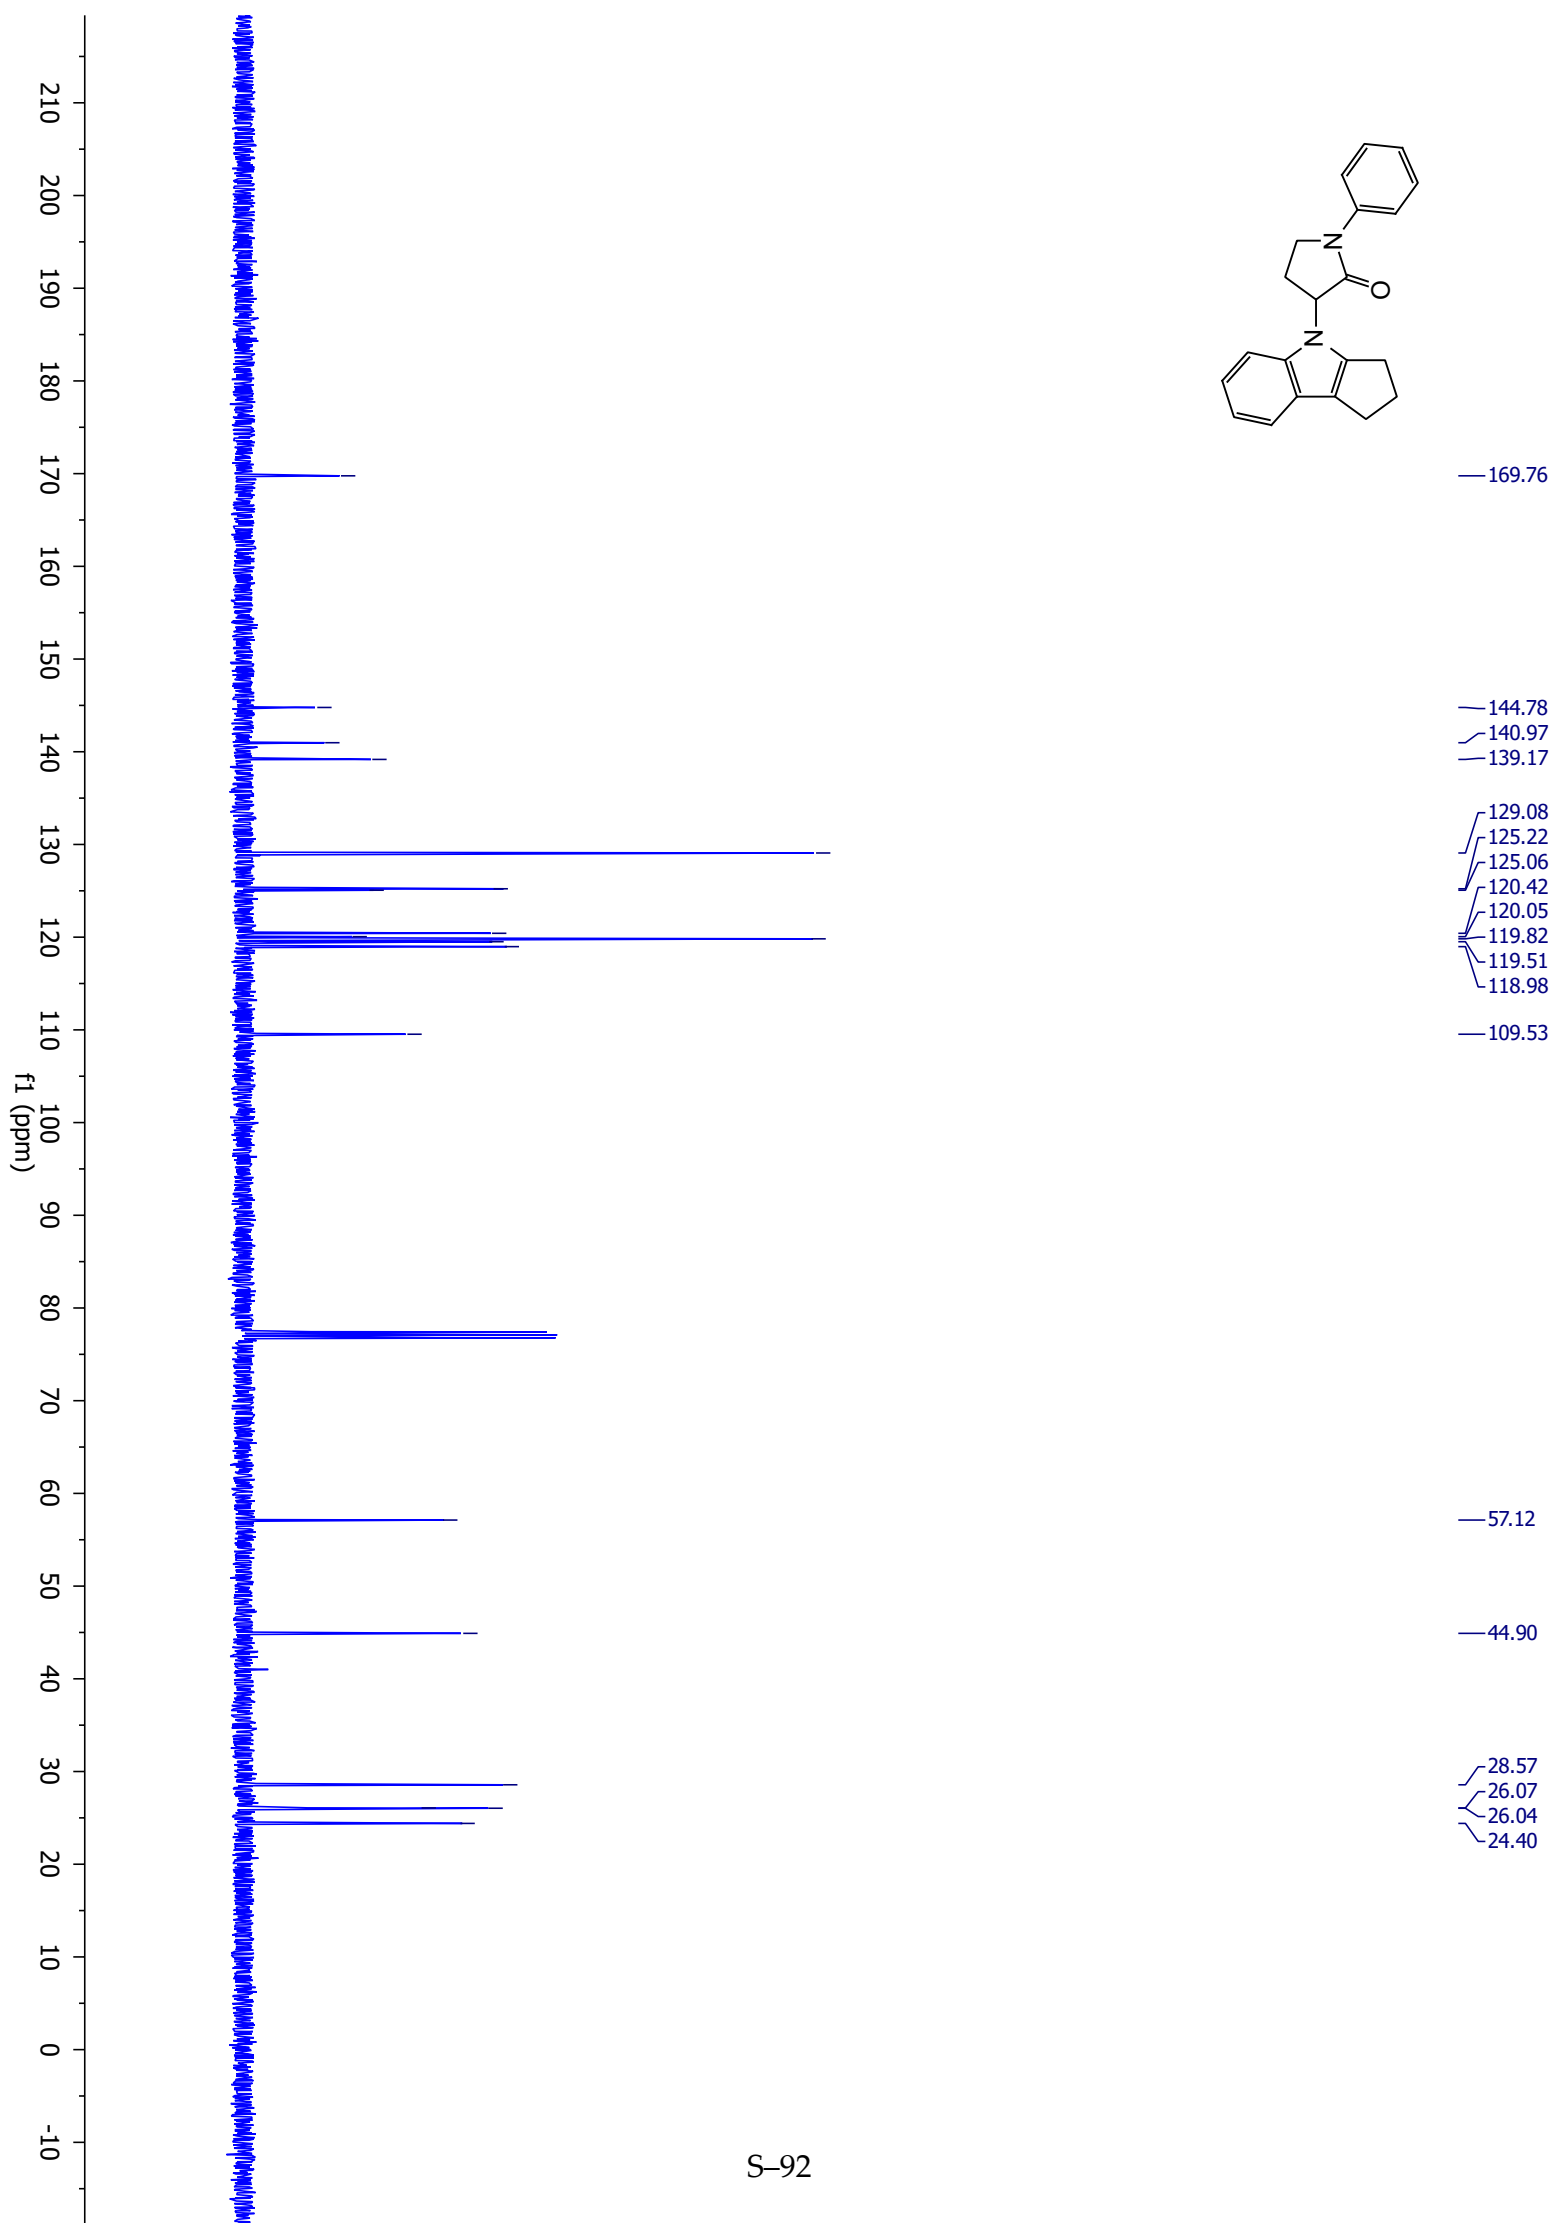

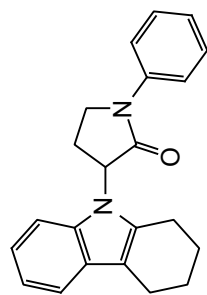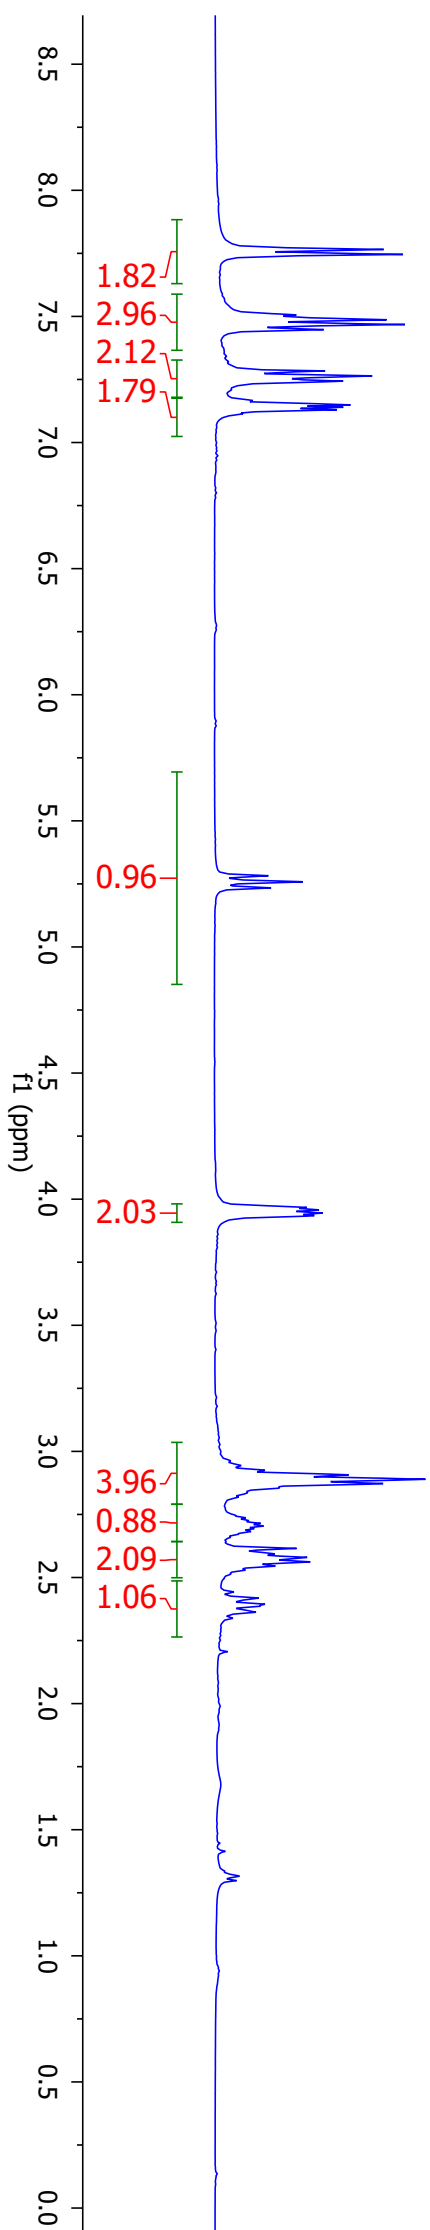

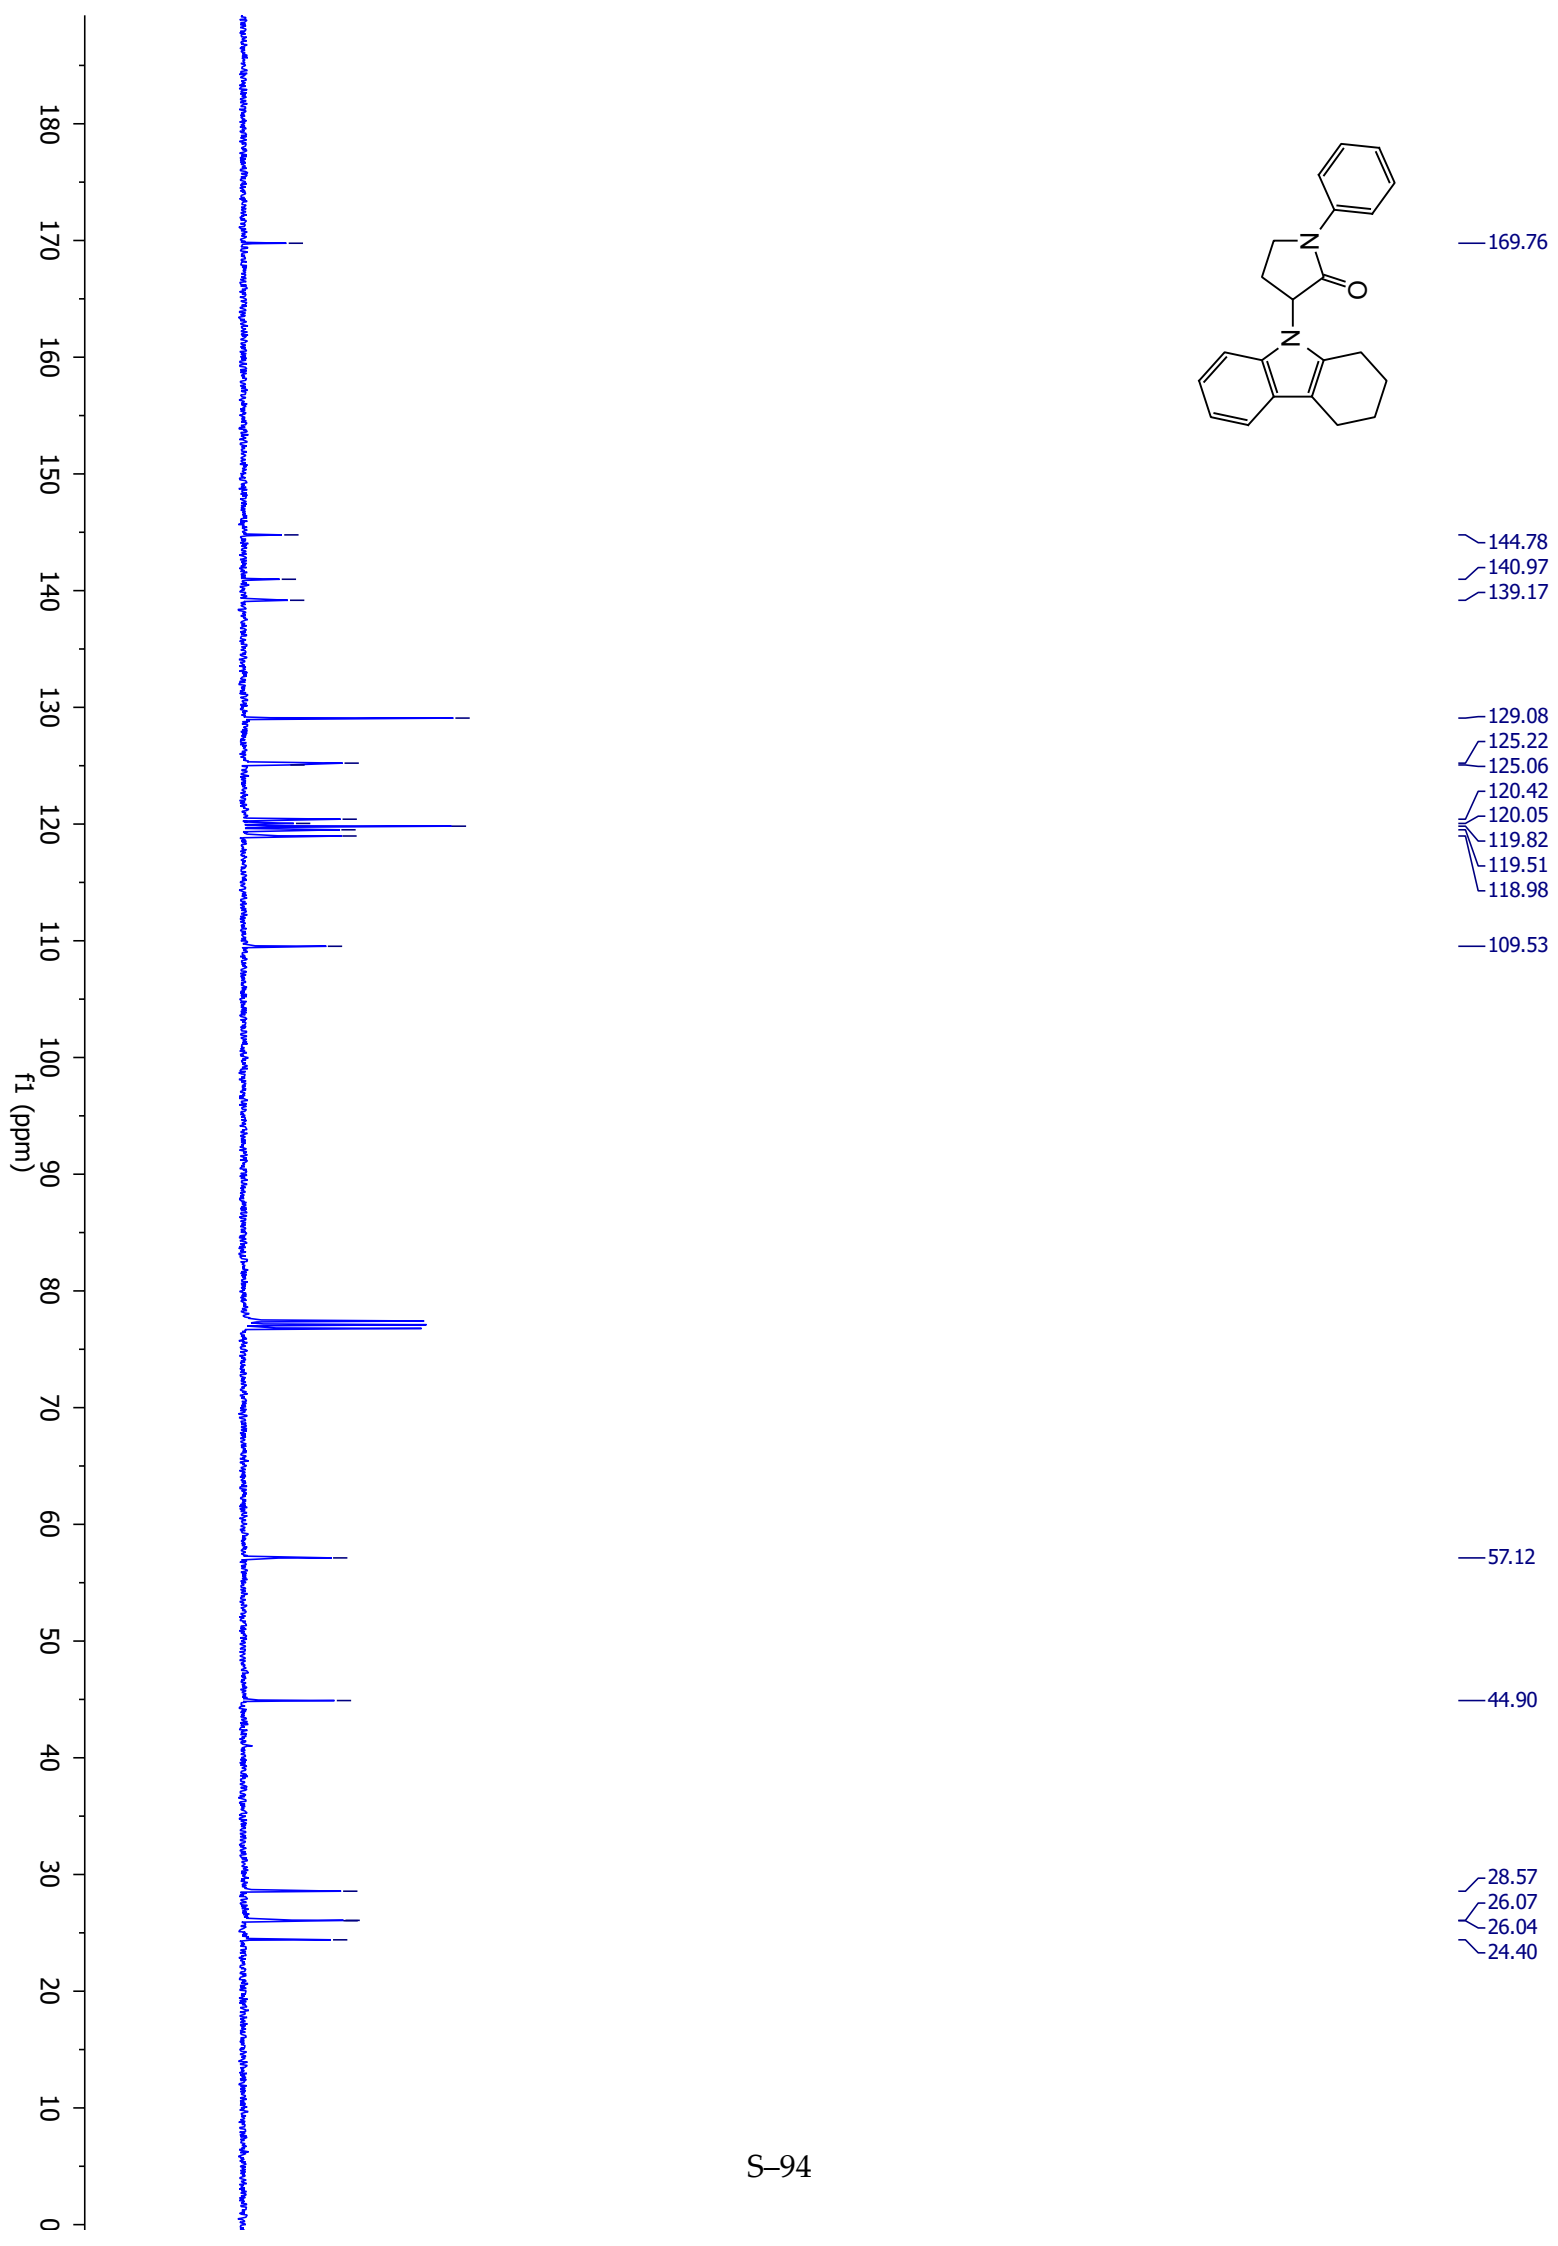

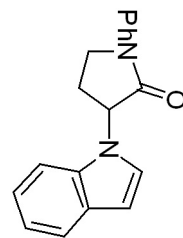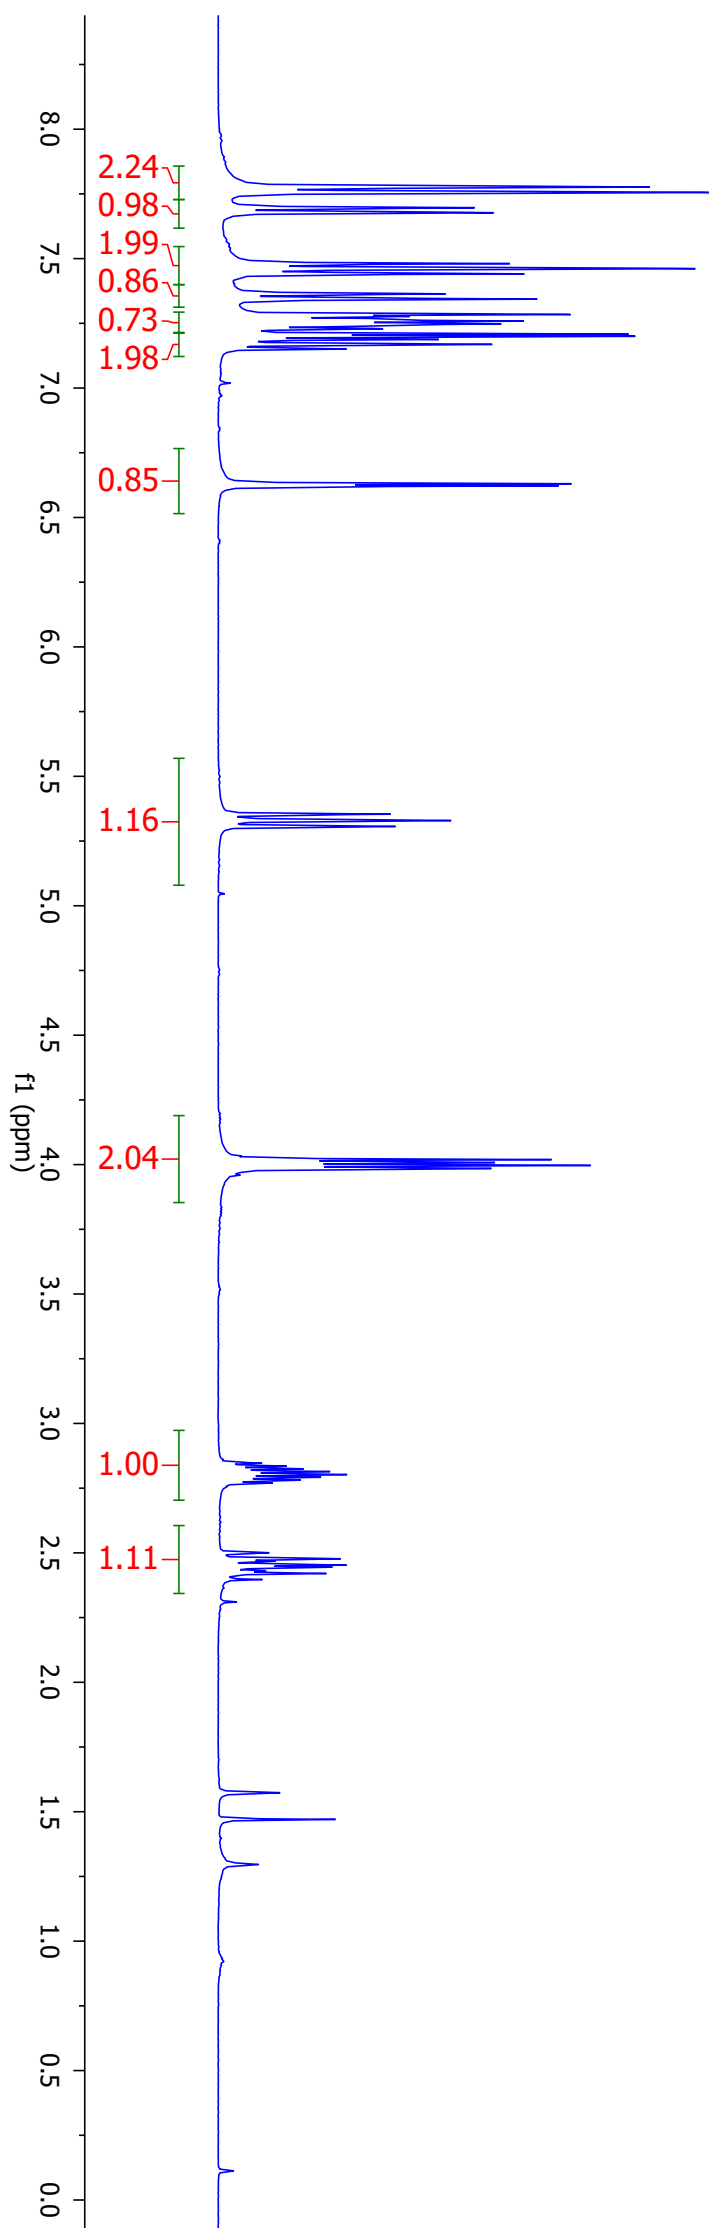

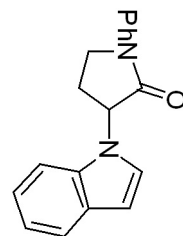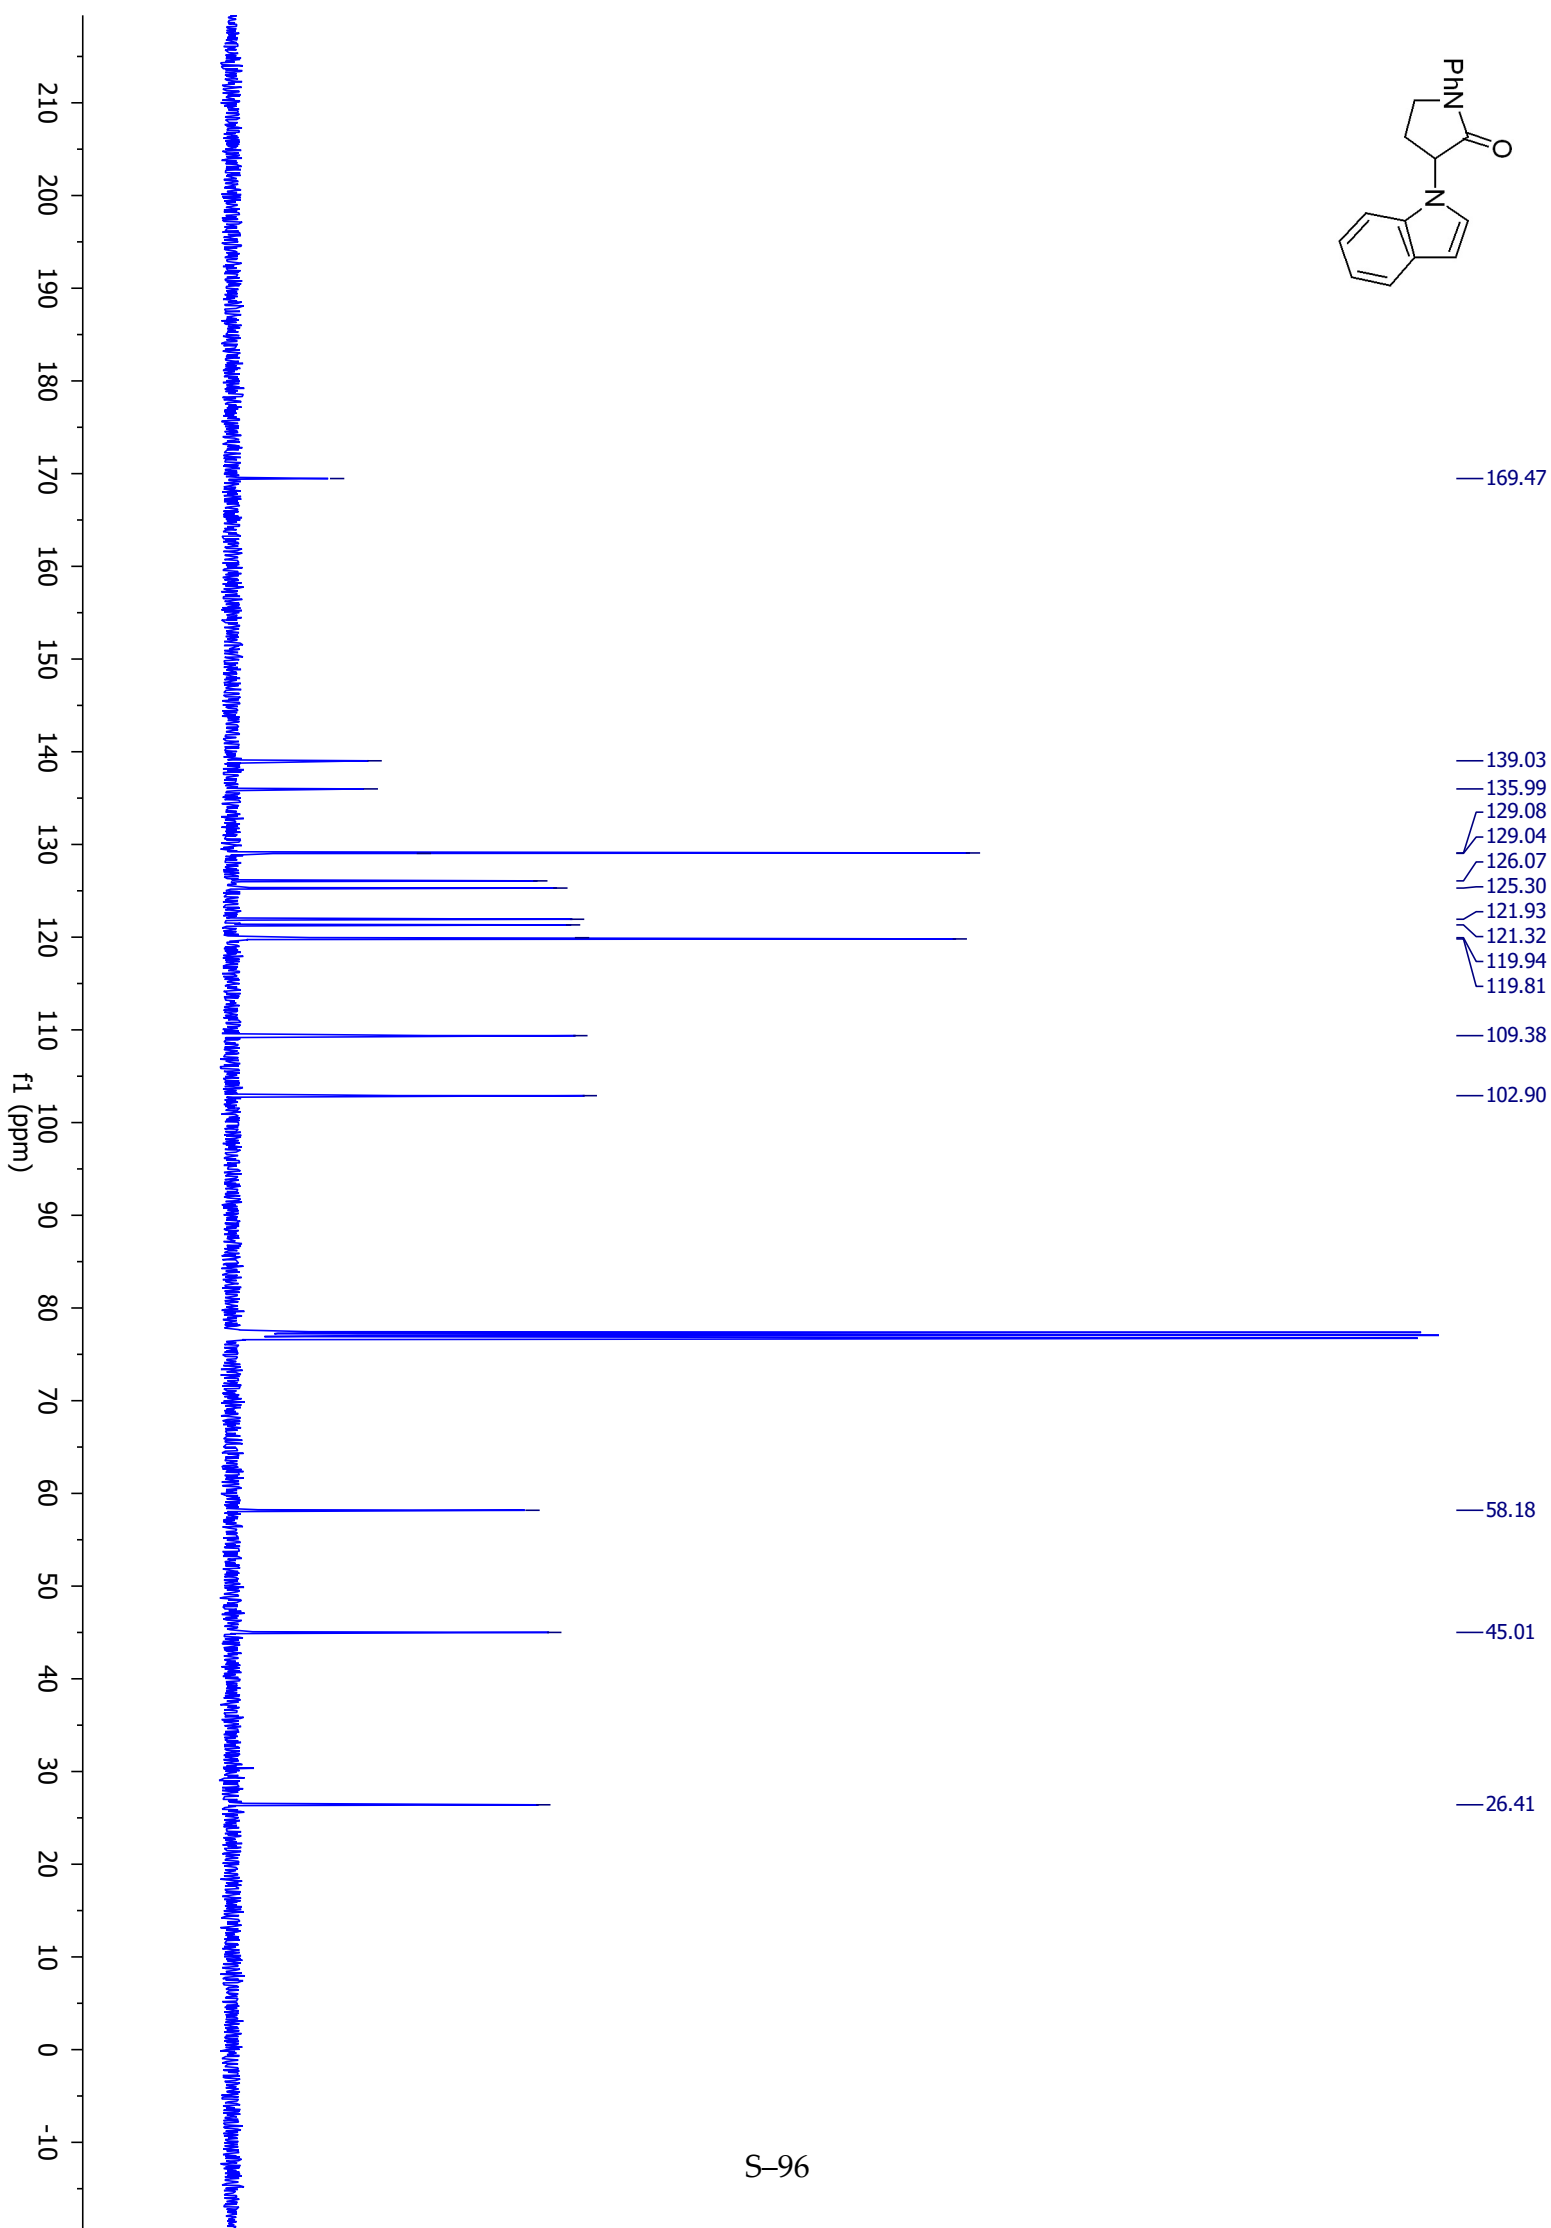





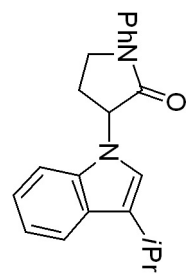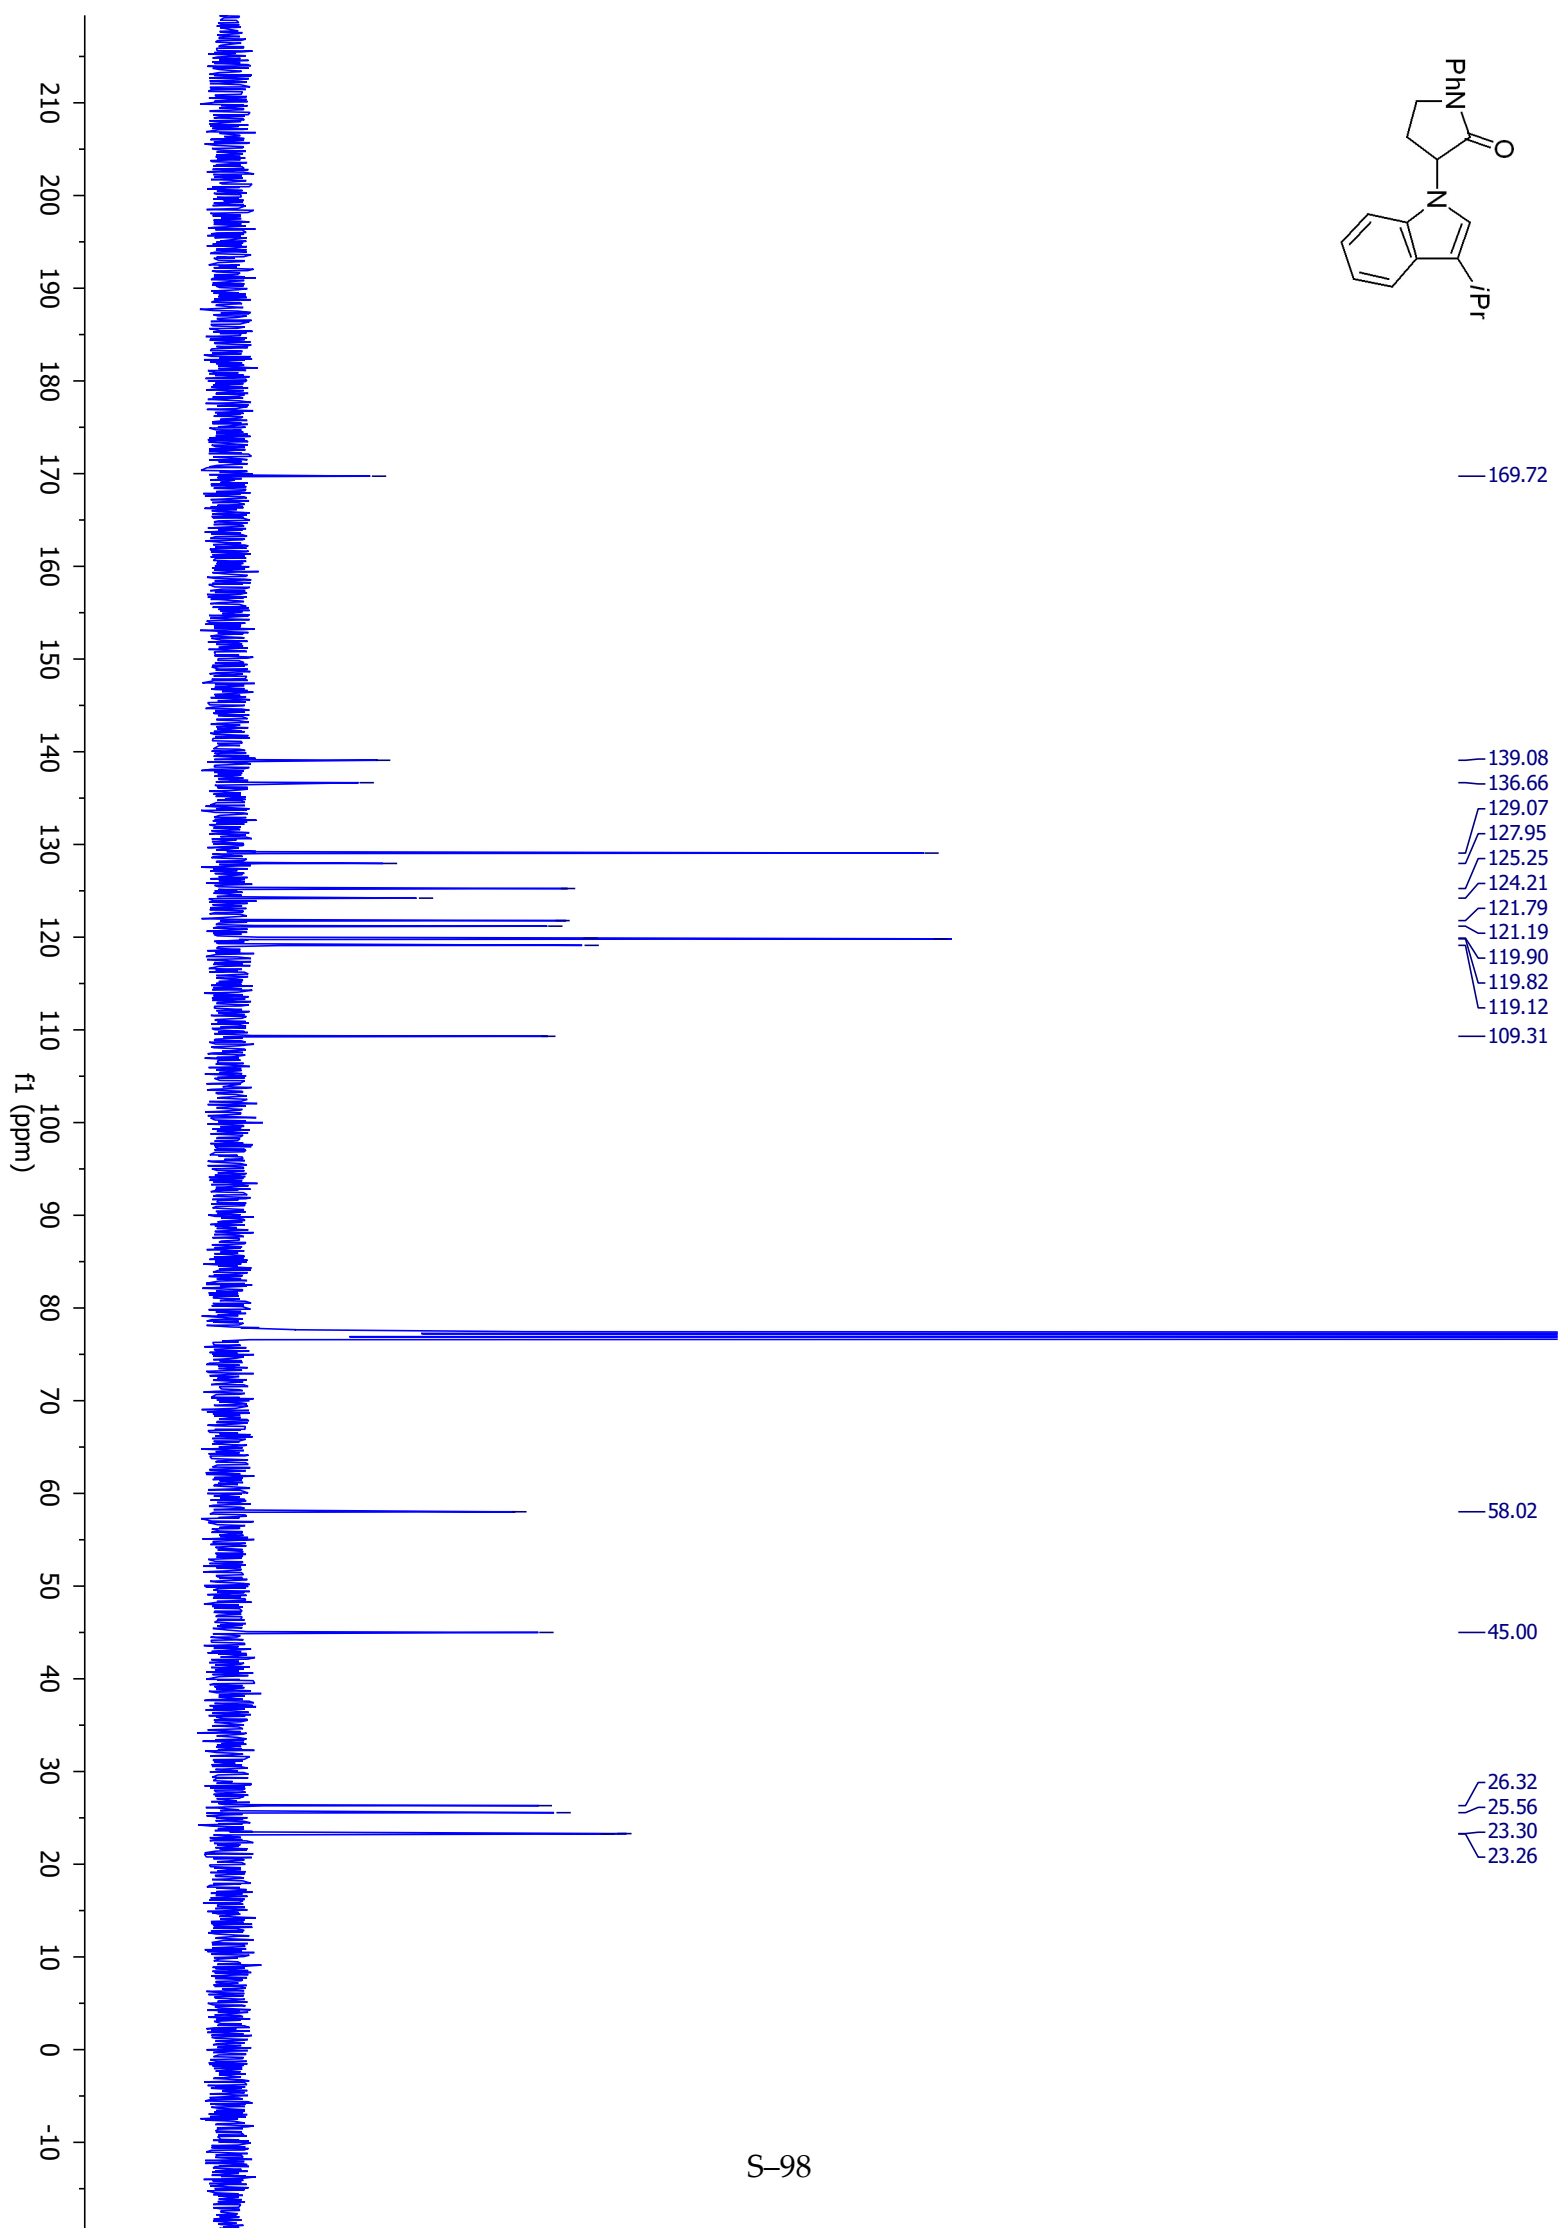

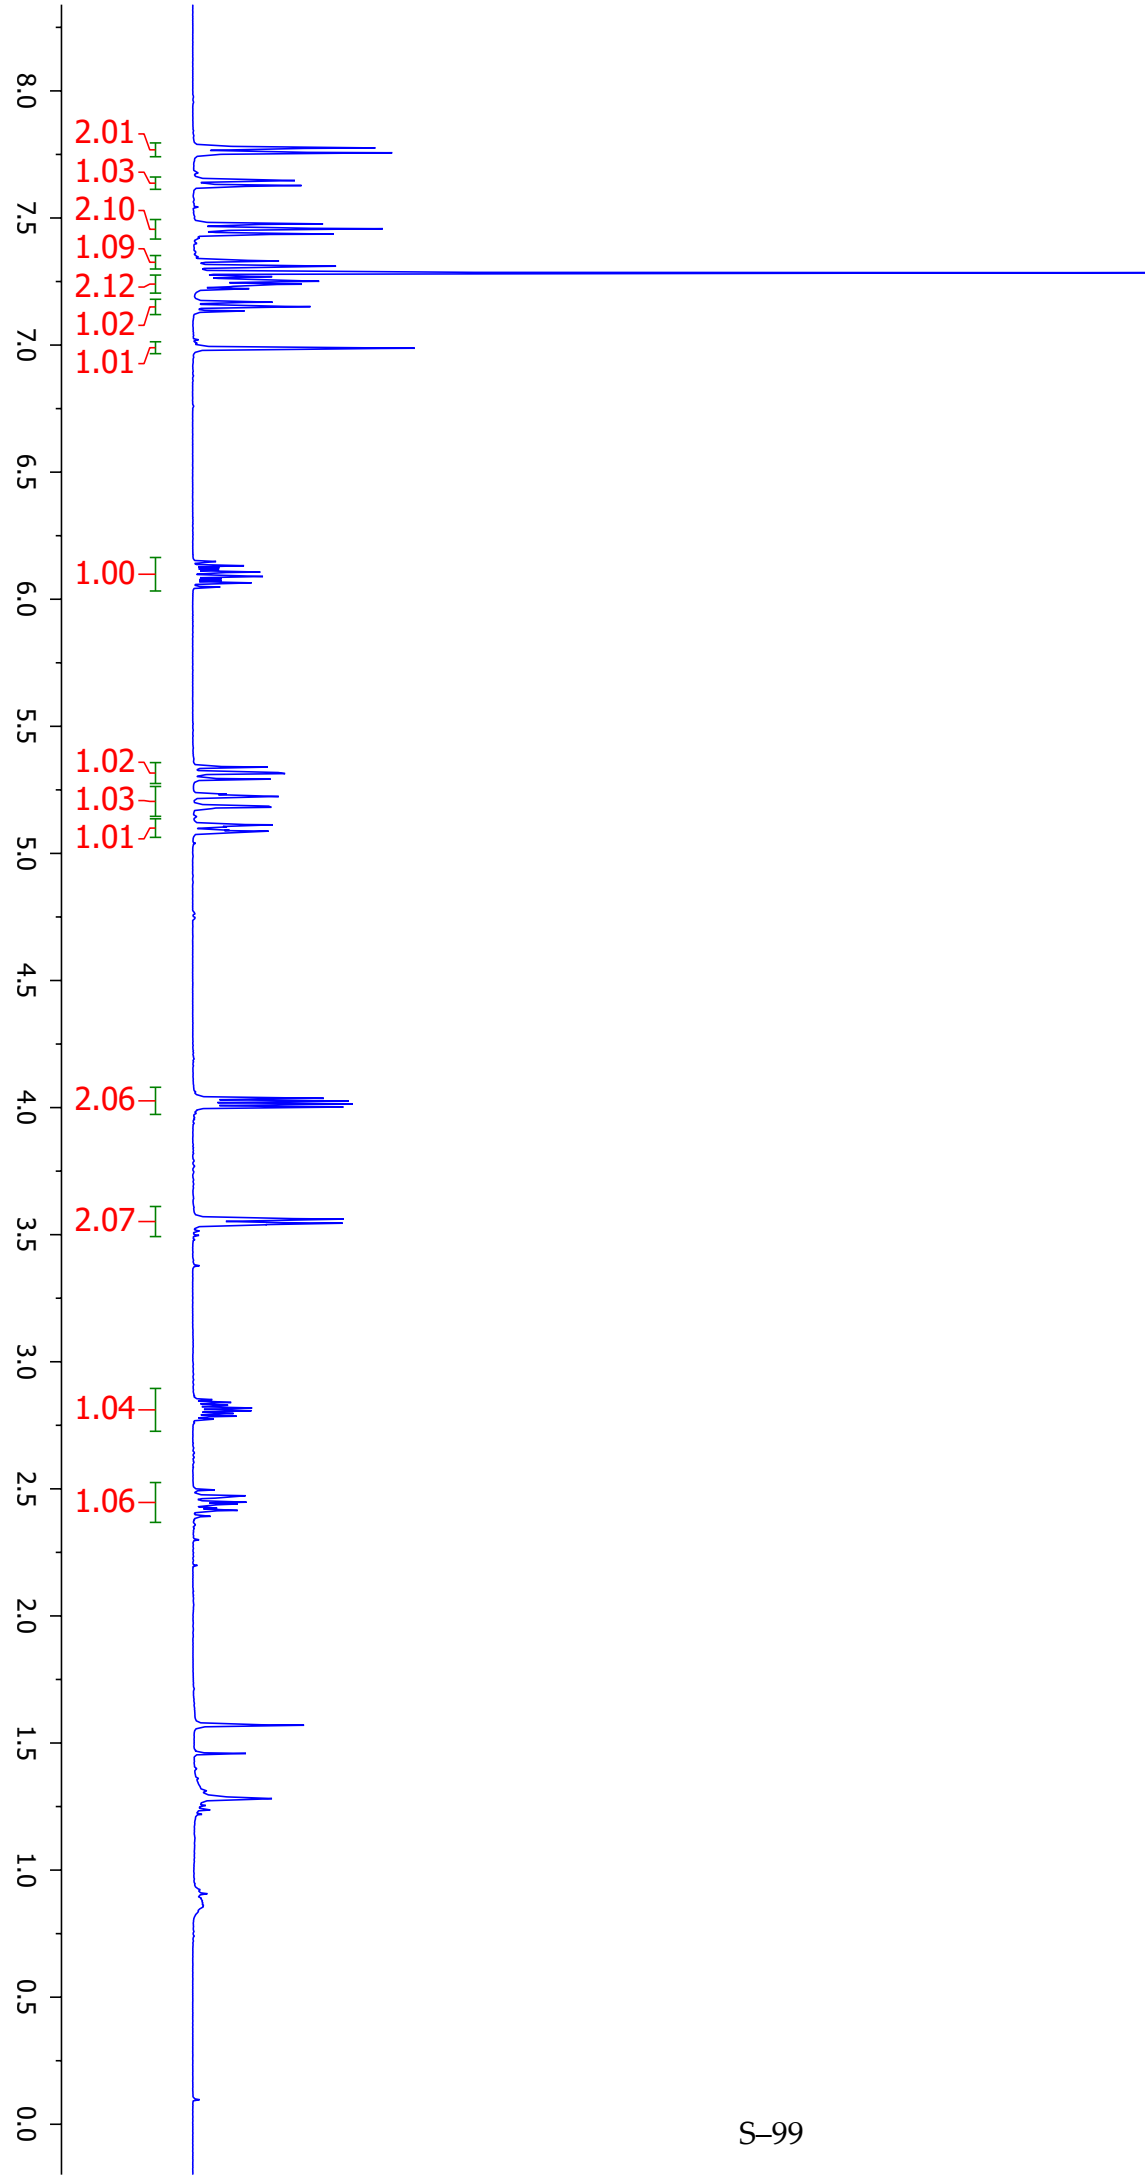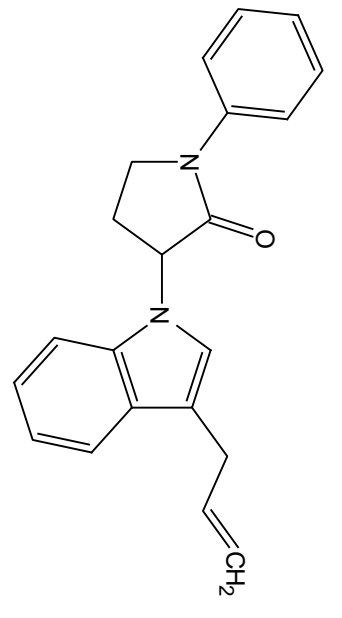

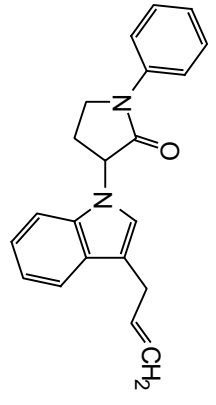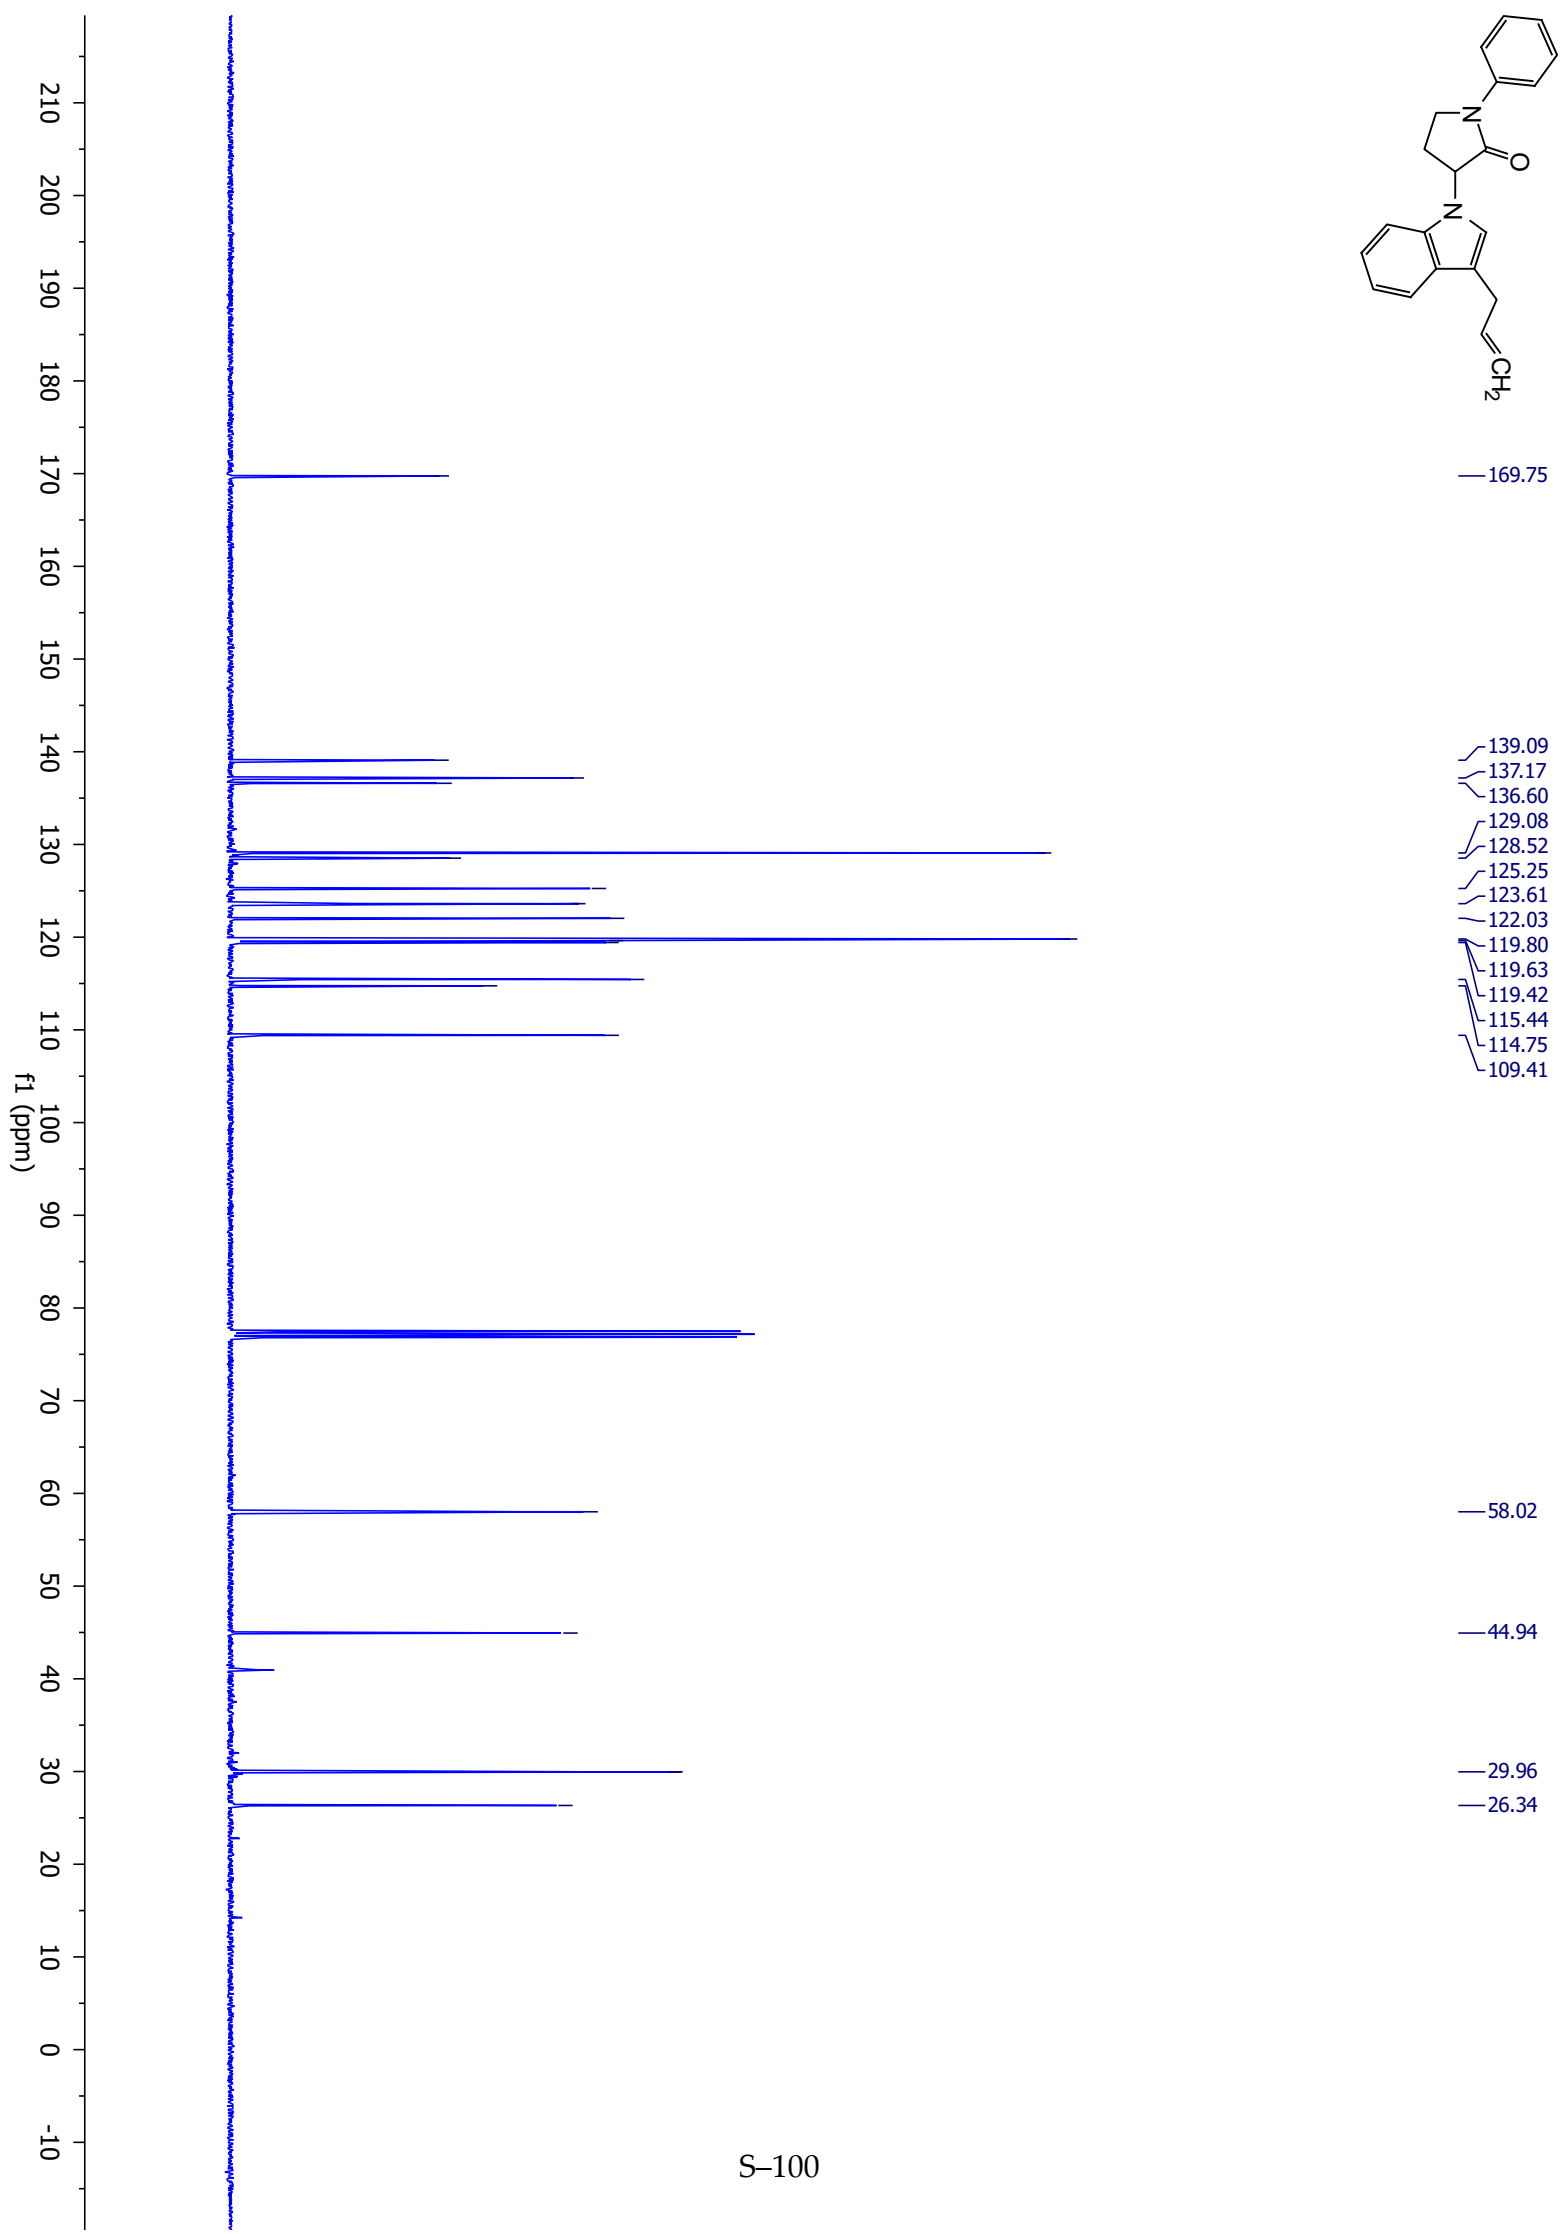

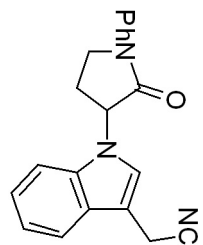

$\delta$  (ppm)

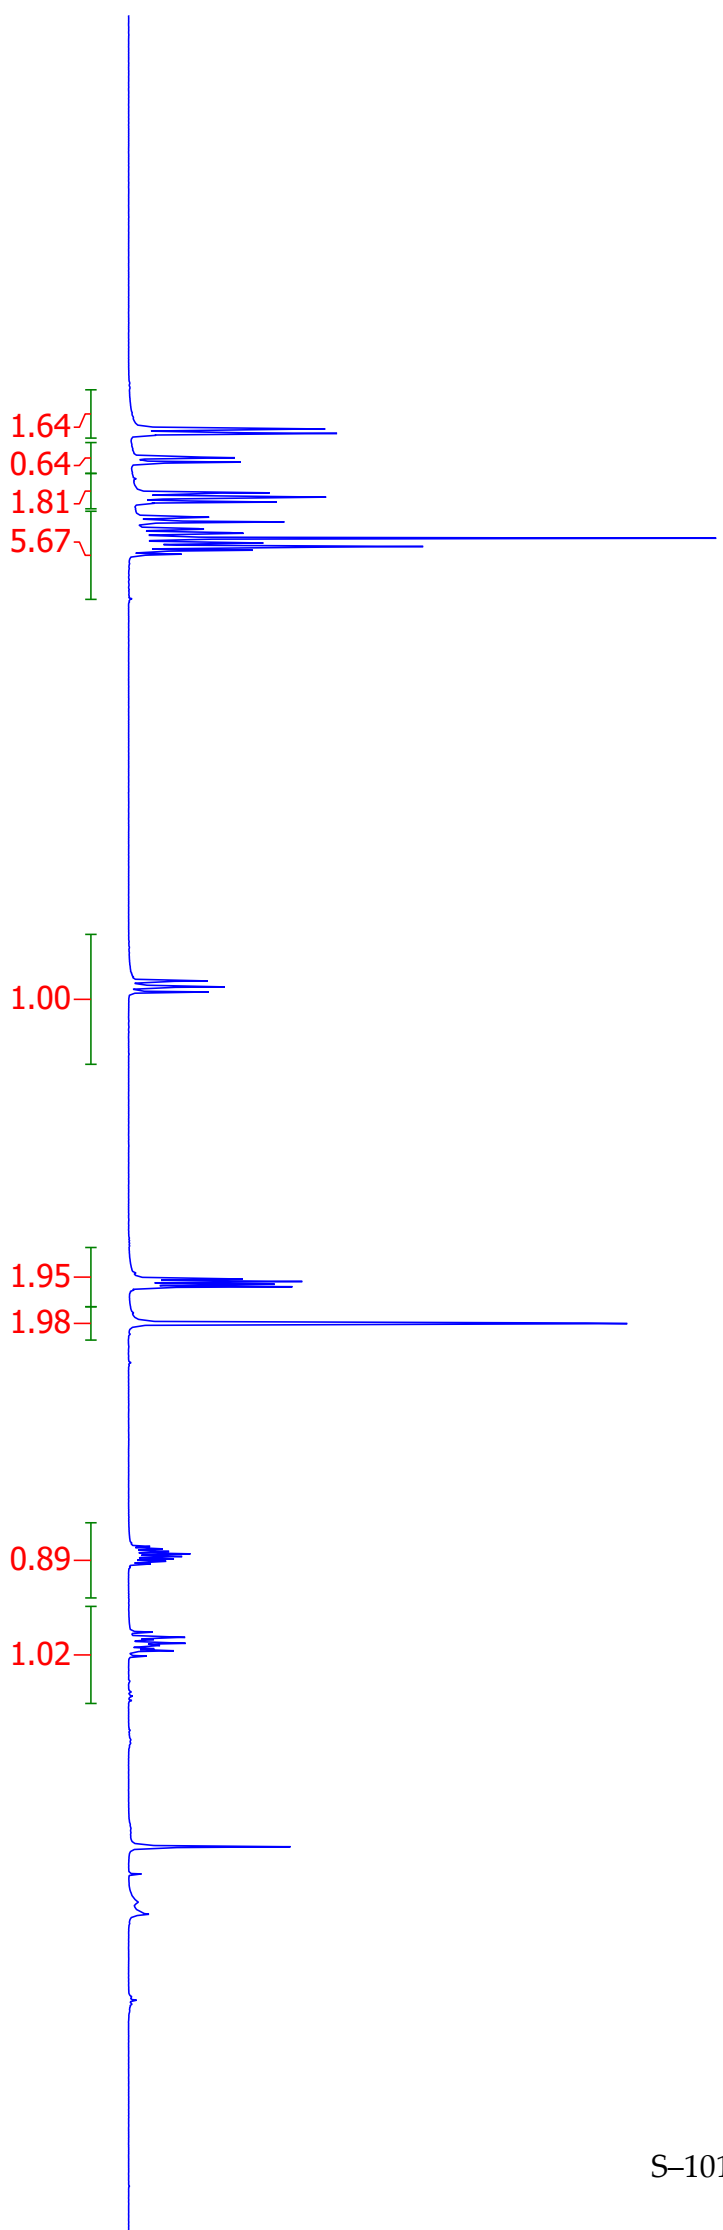

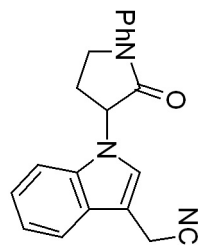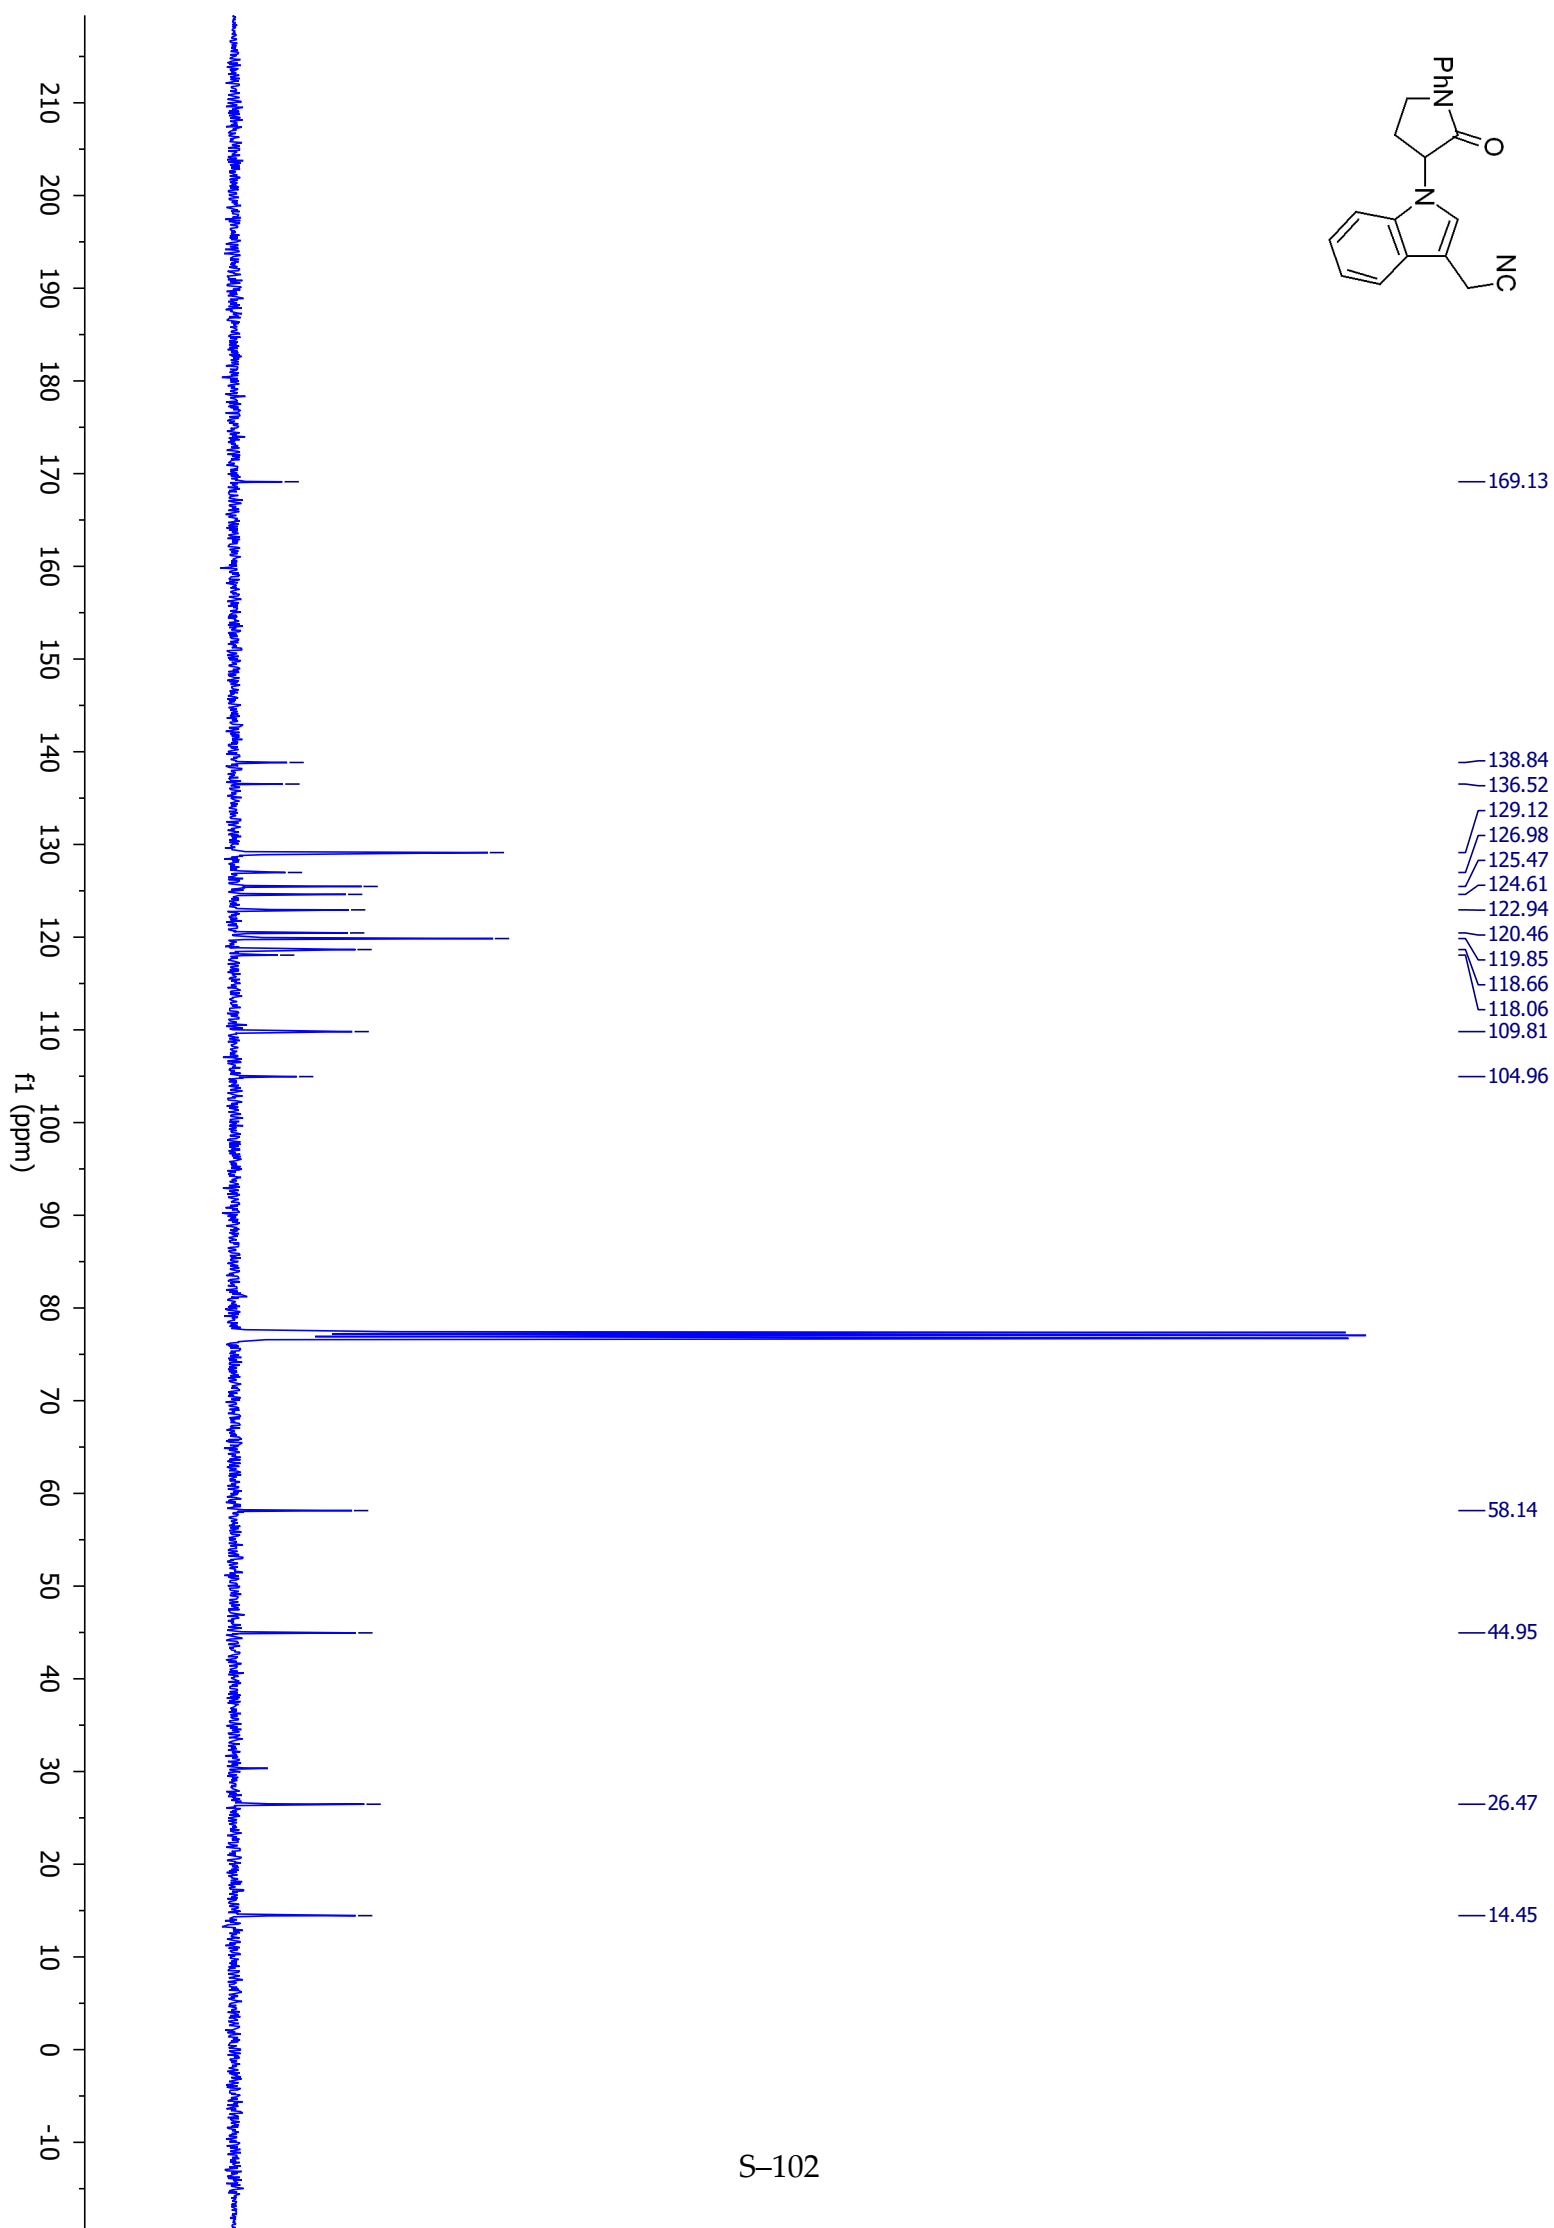

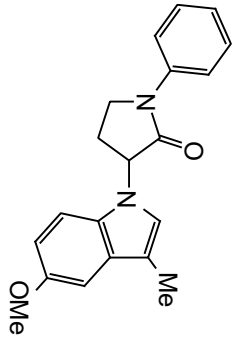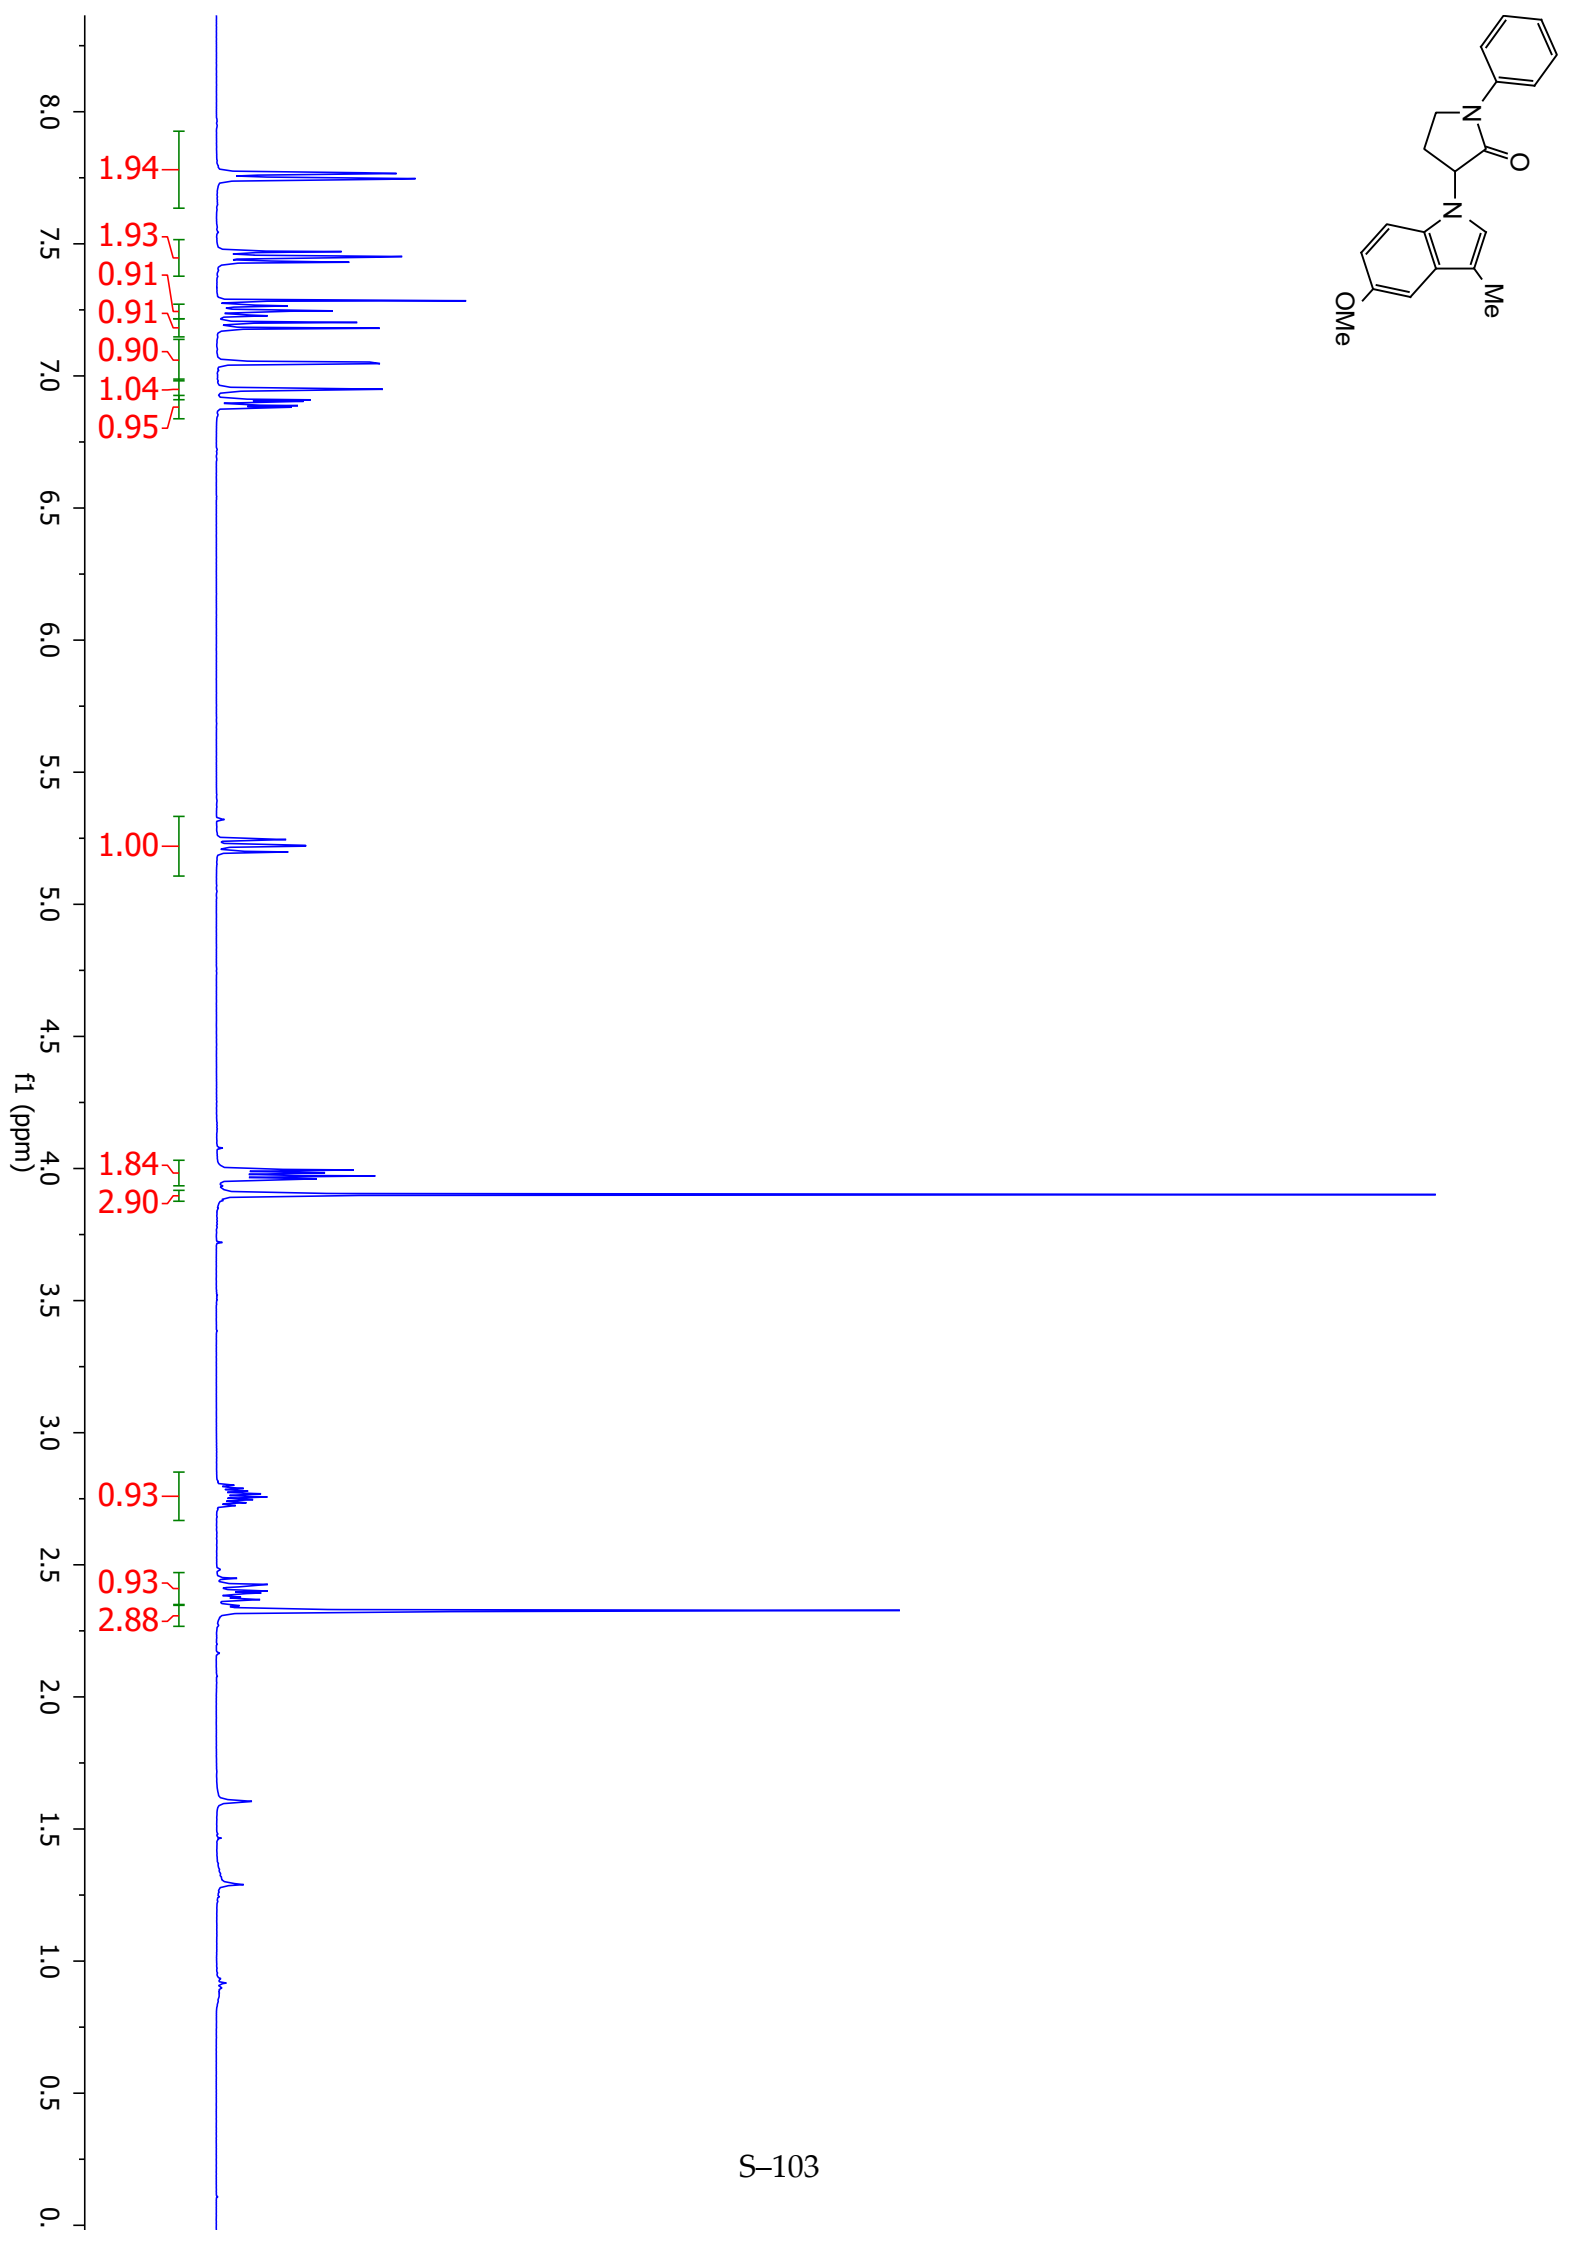

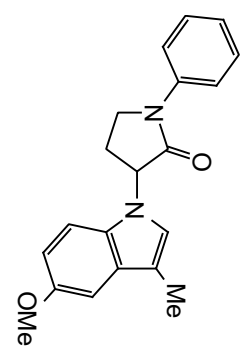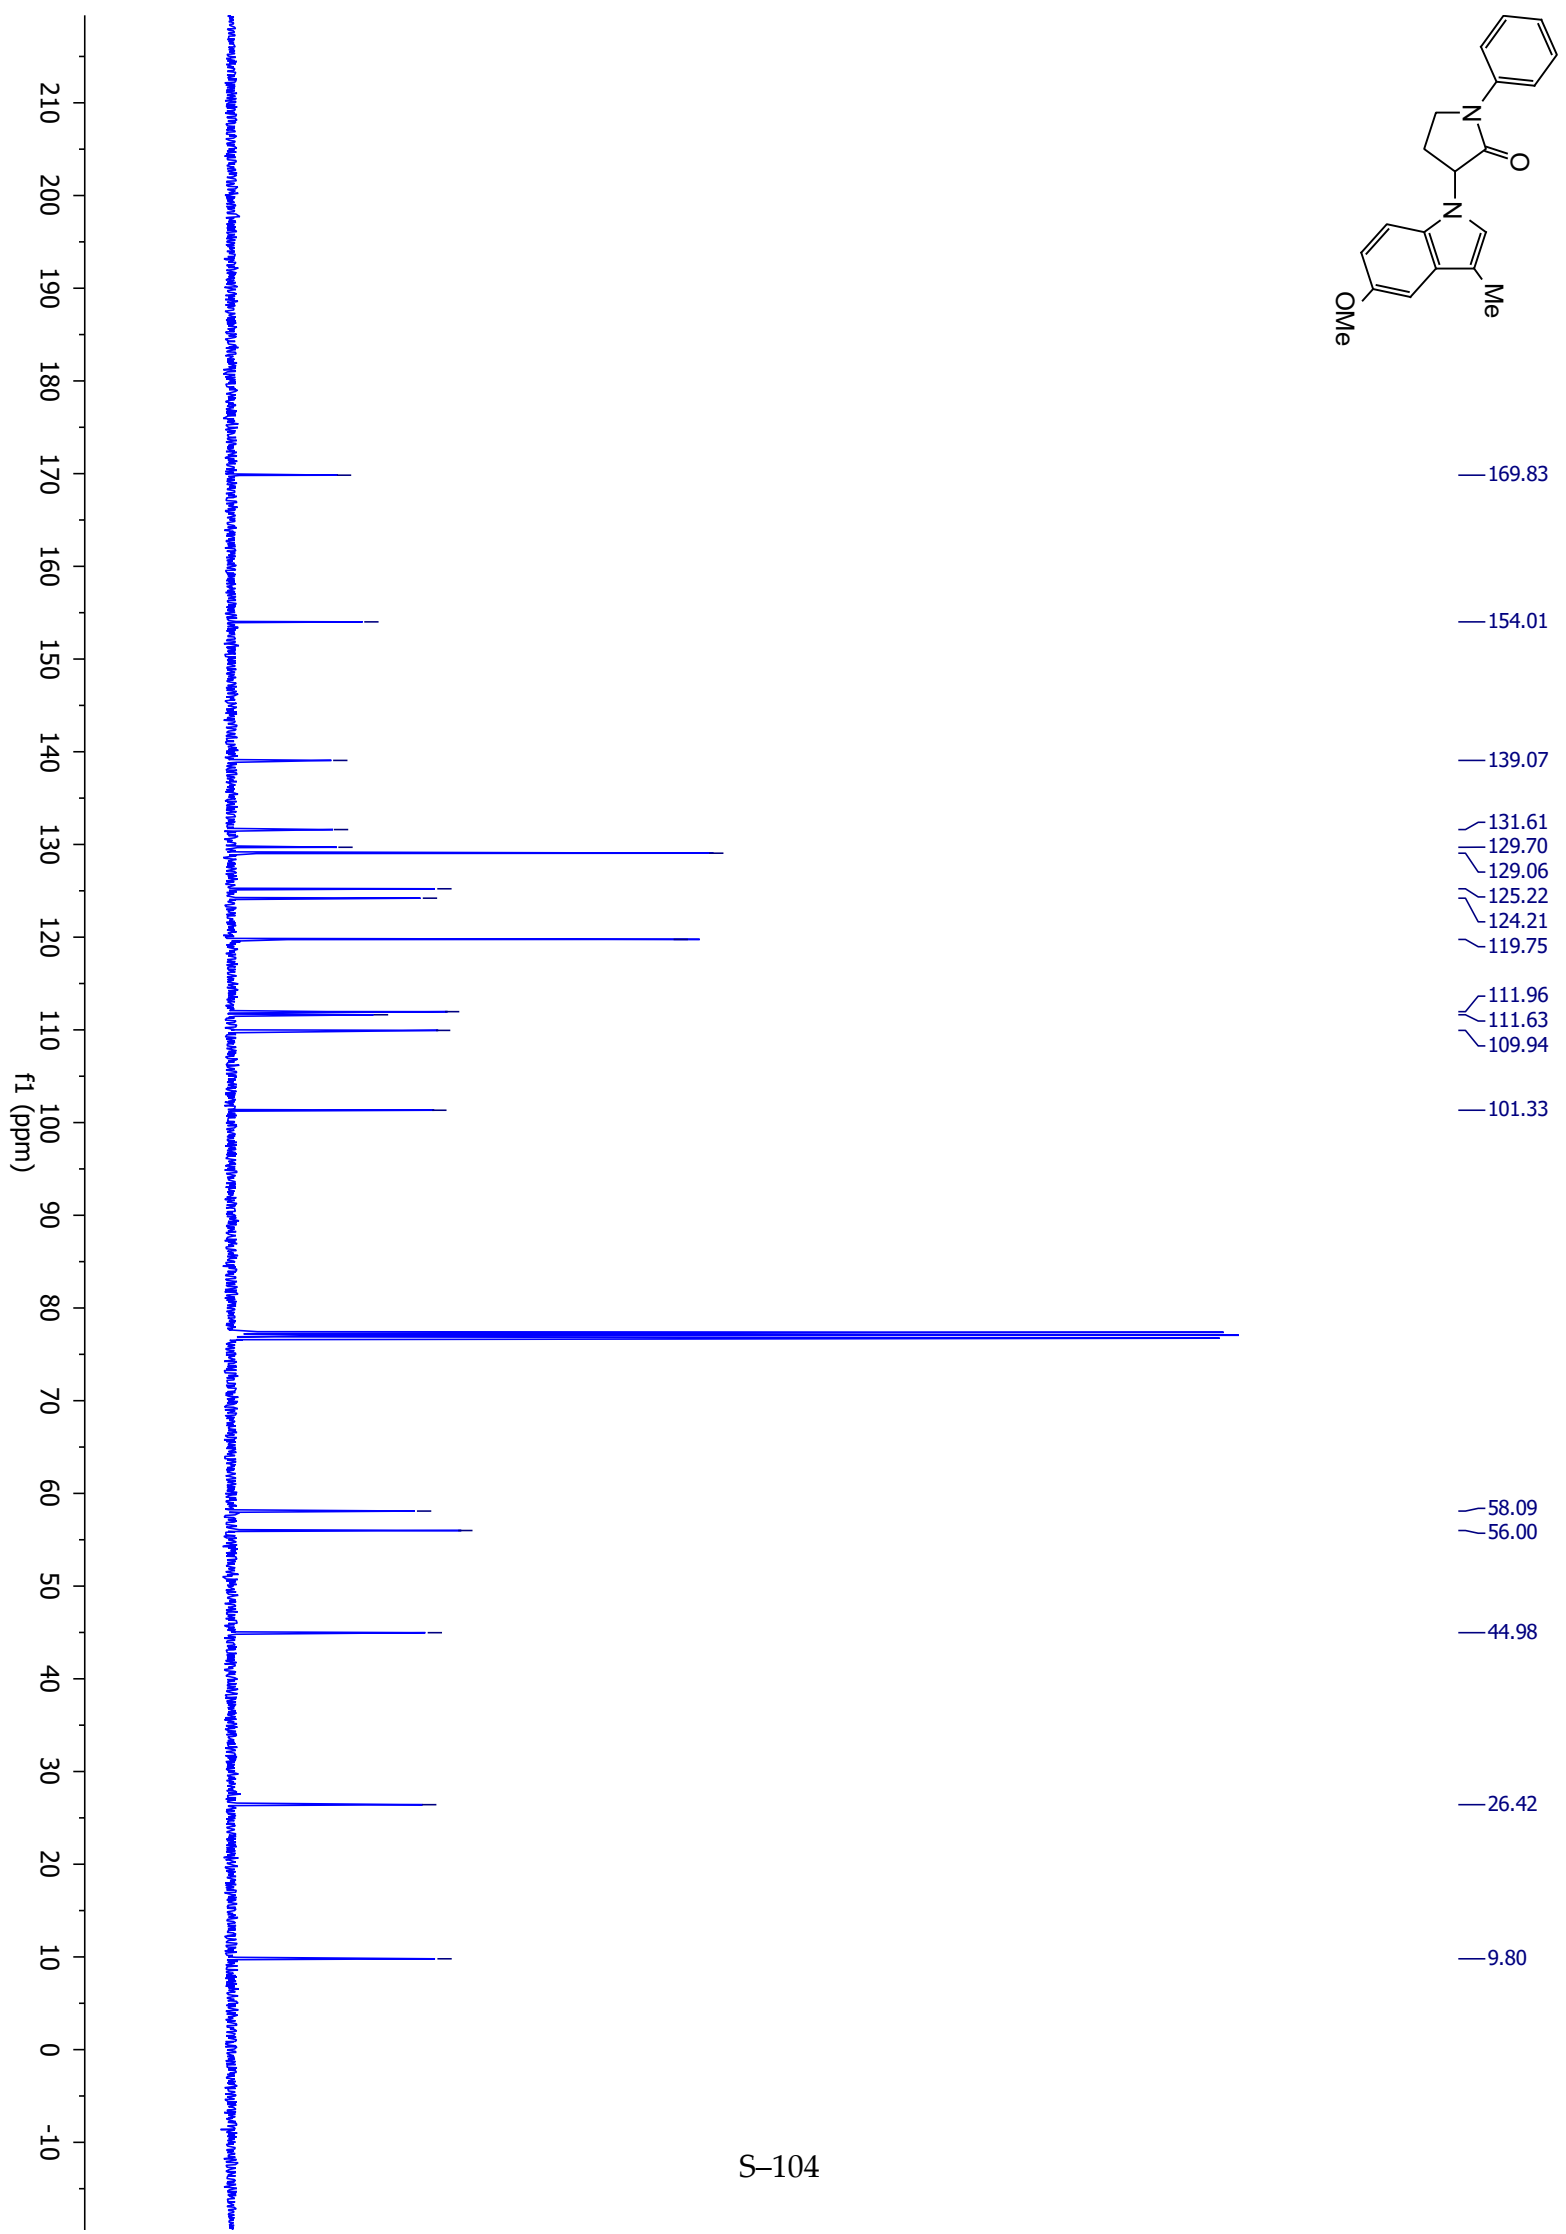



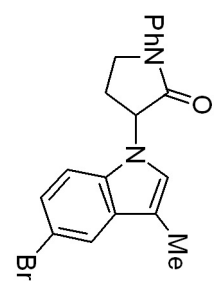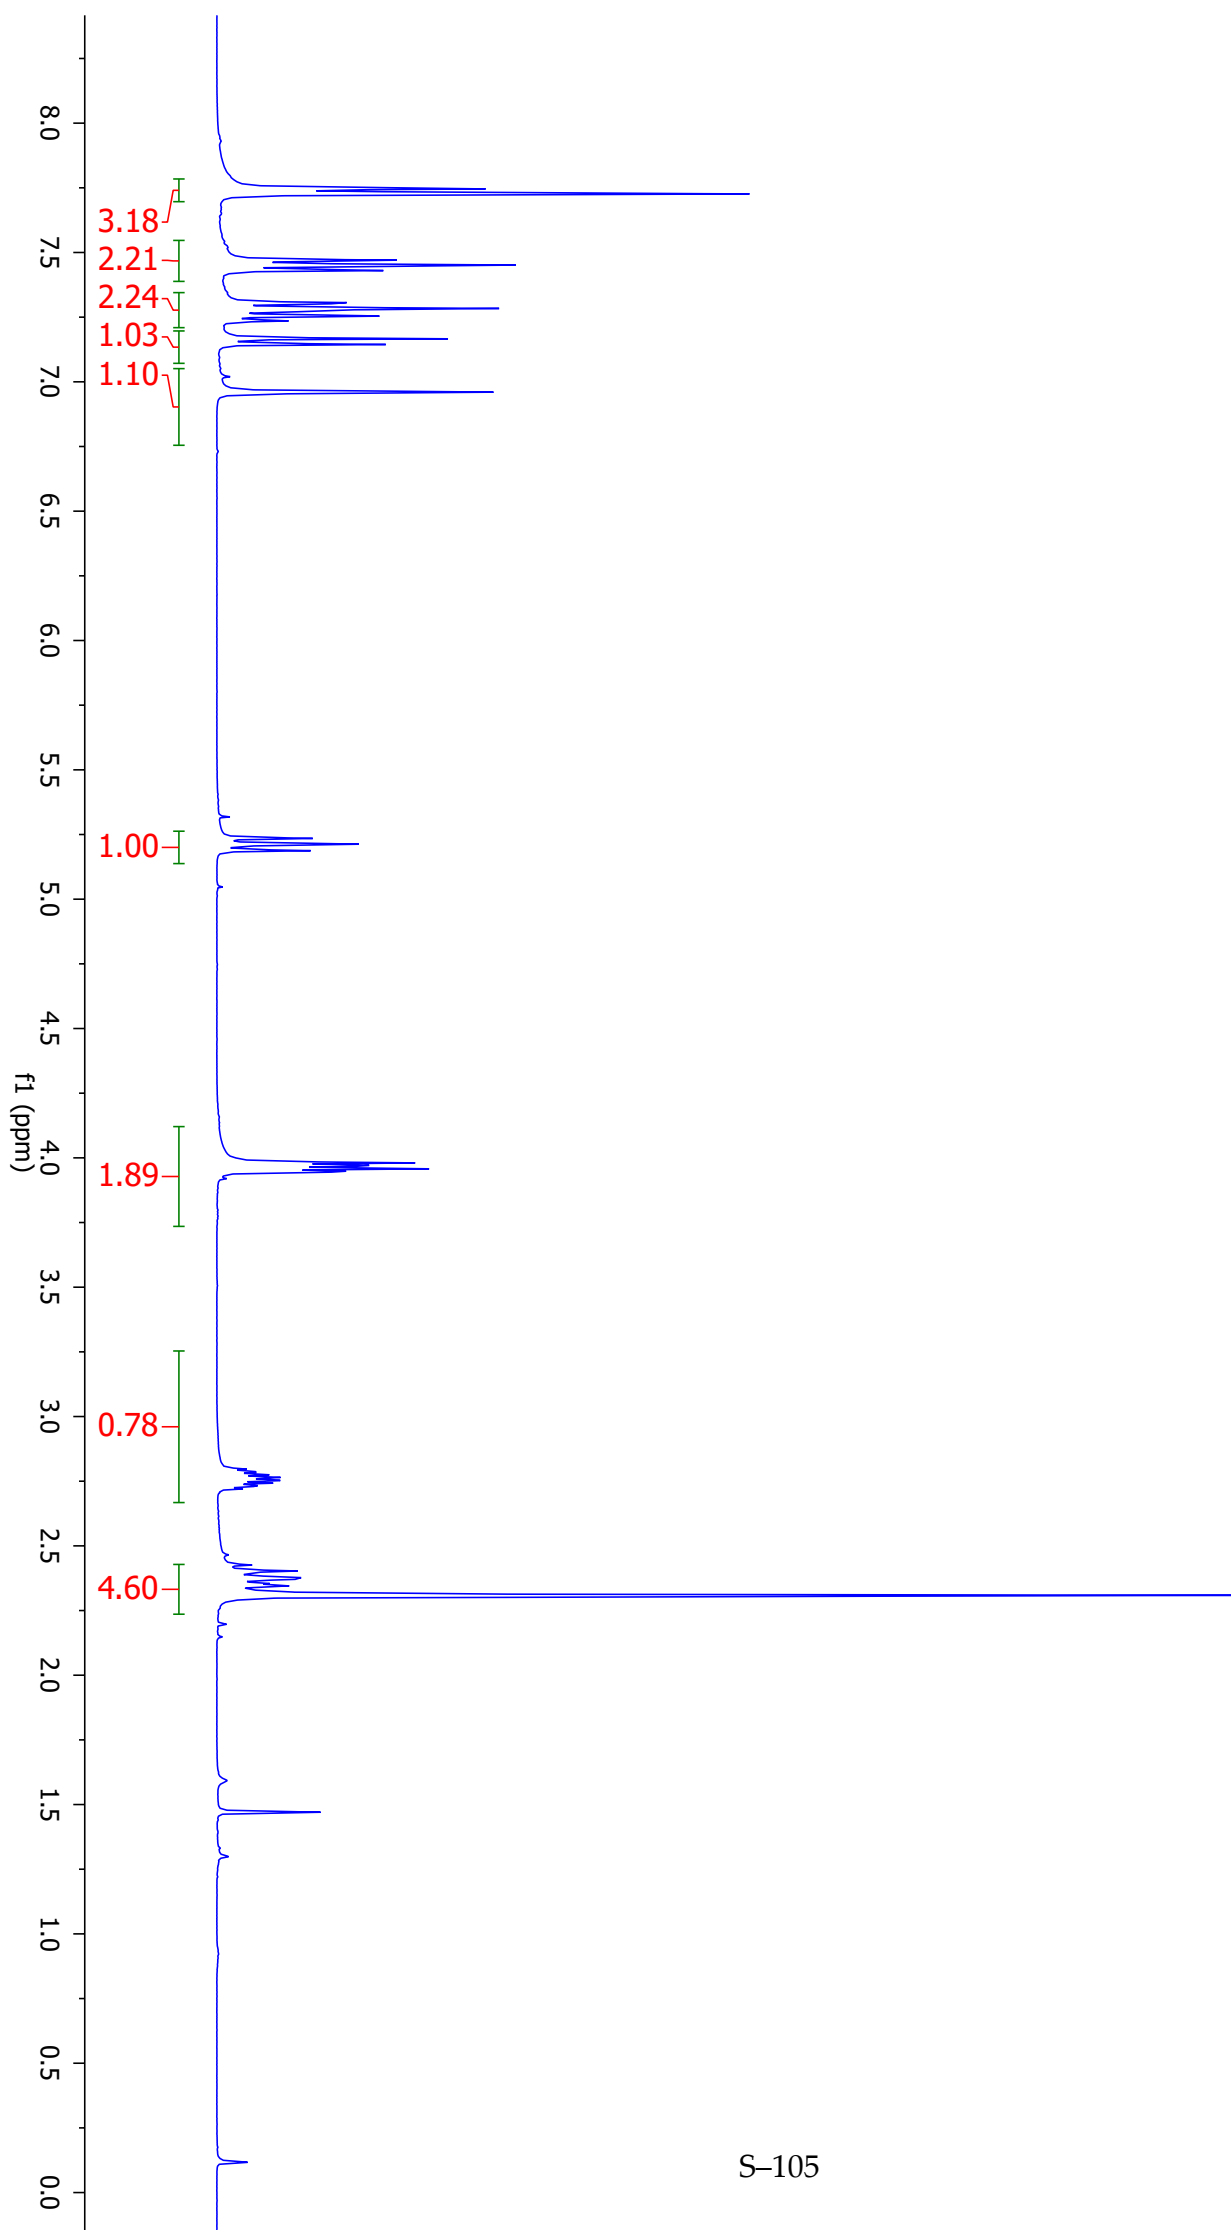

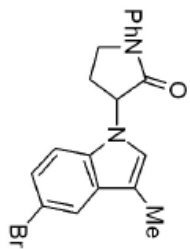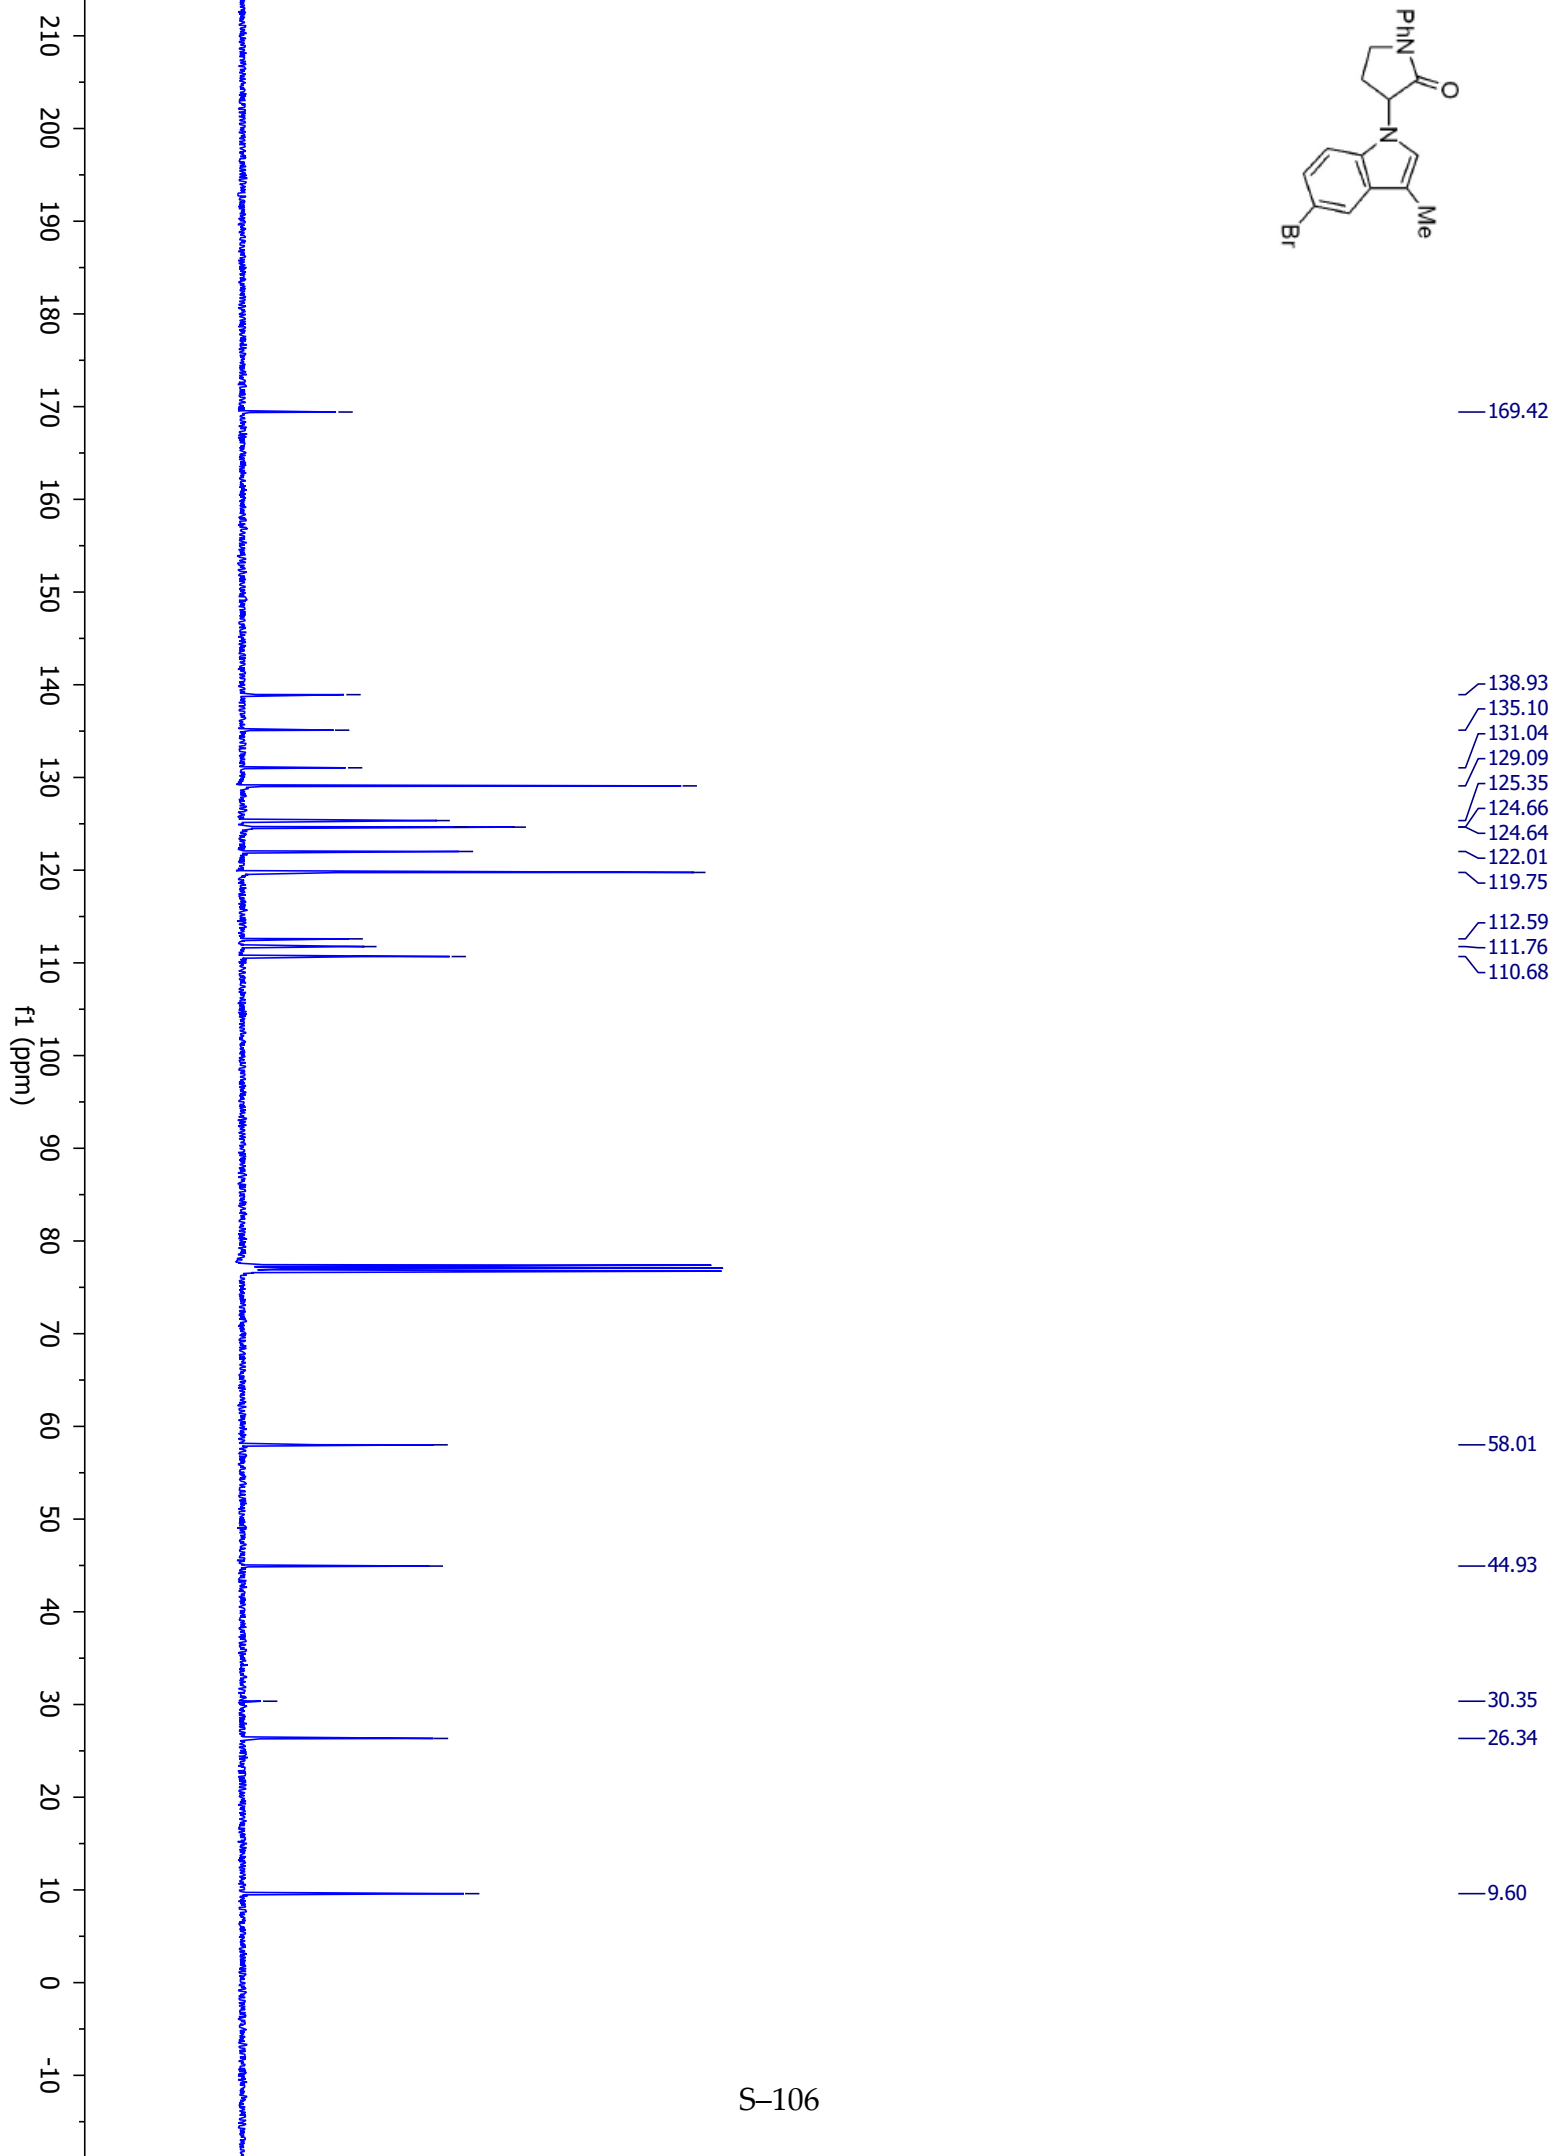

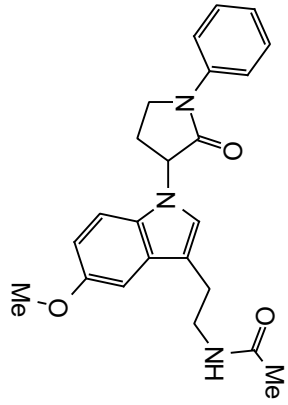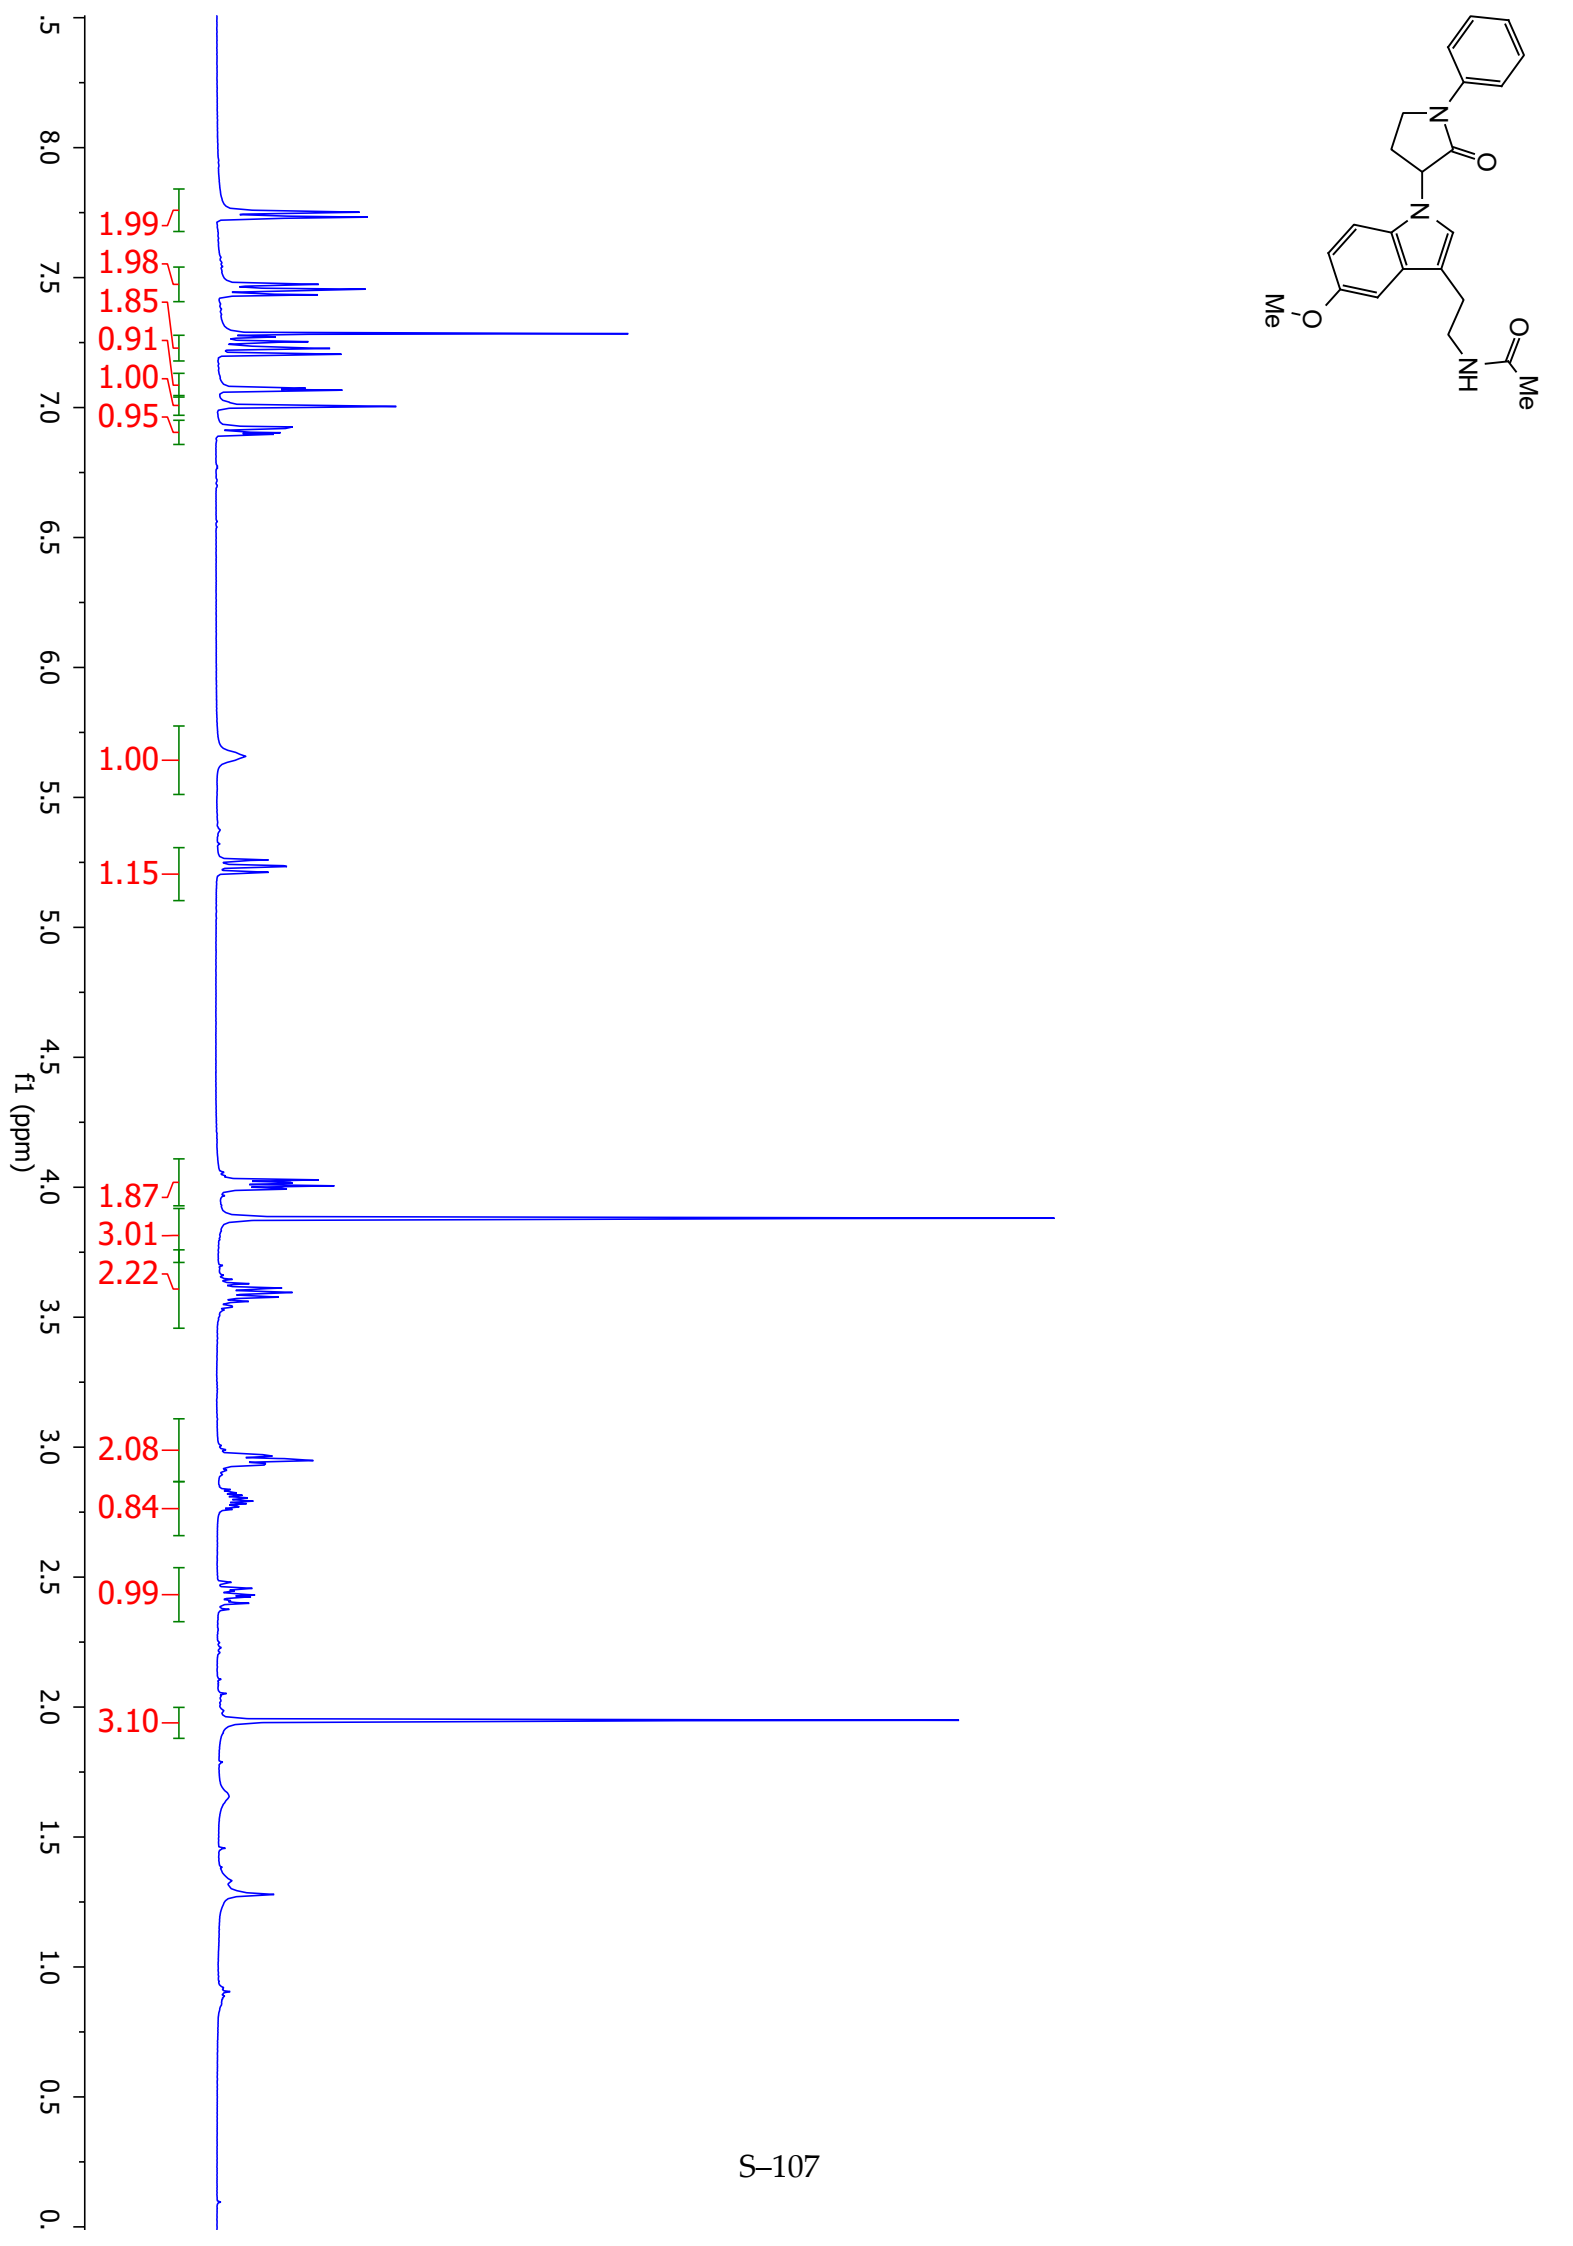

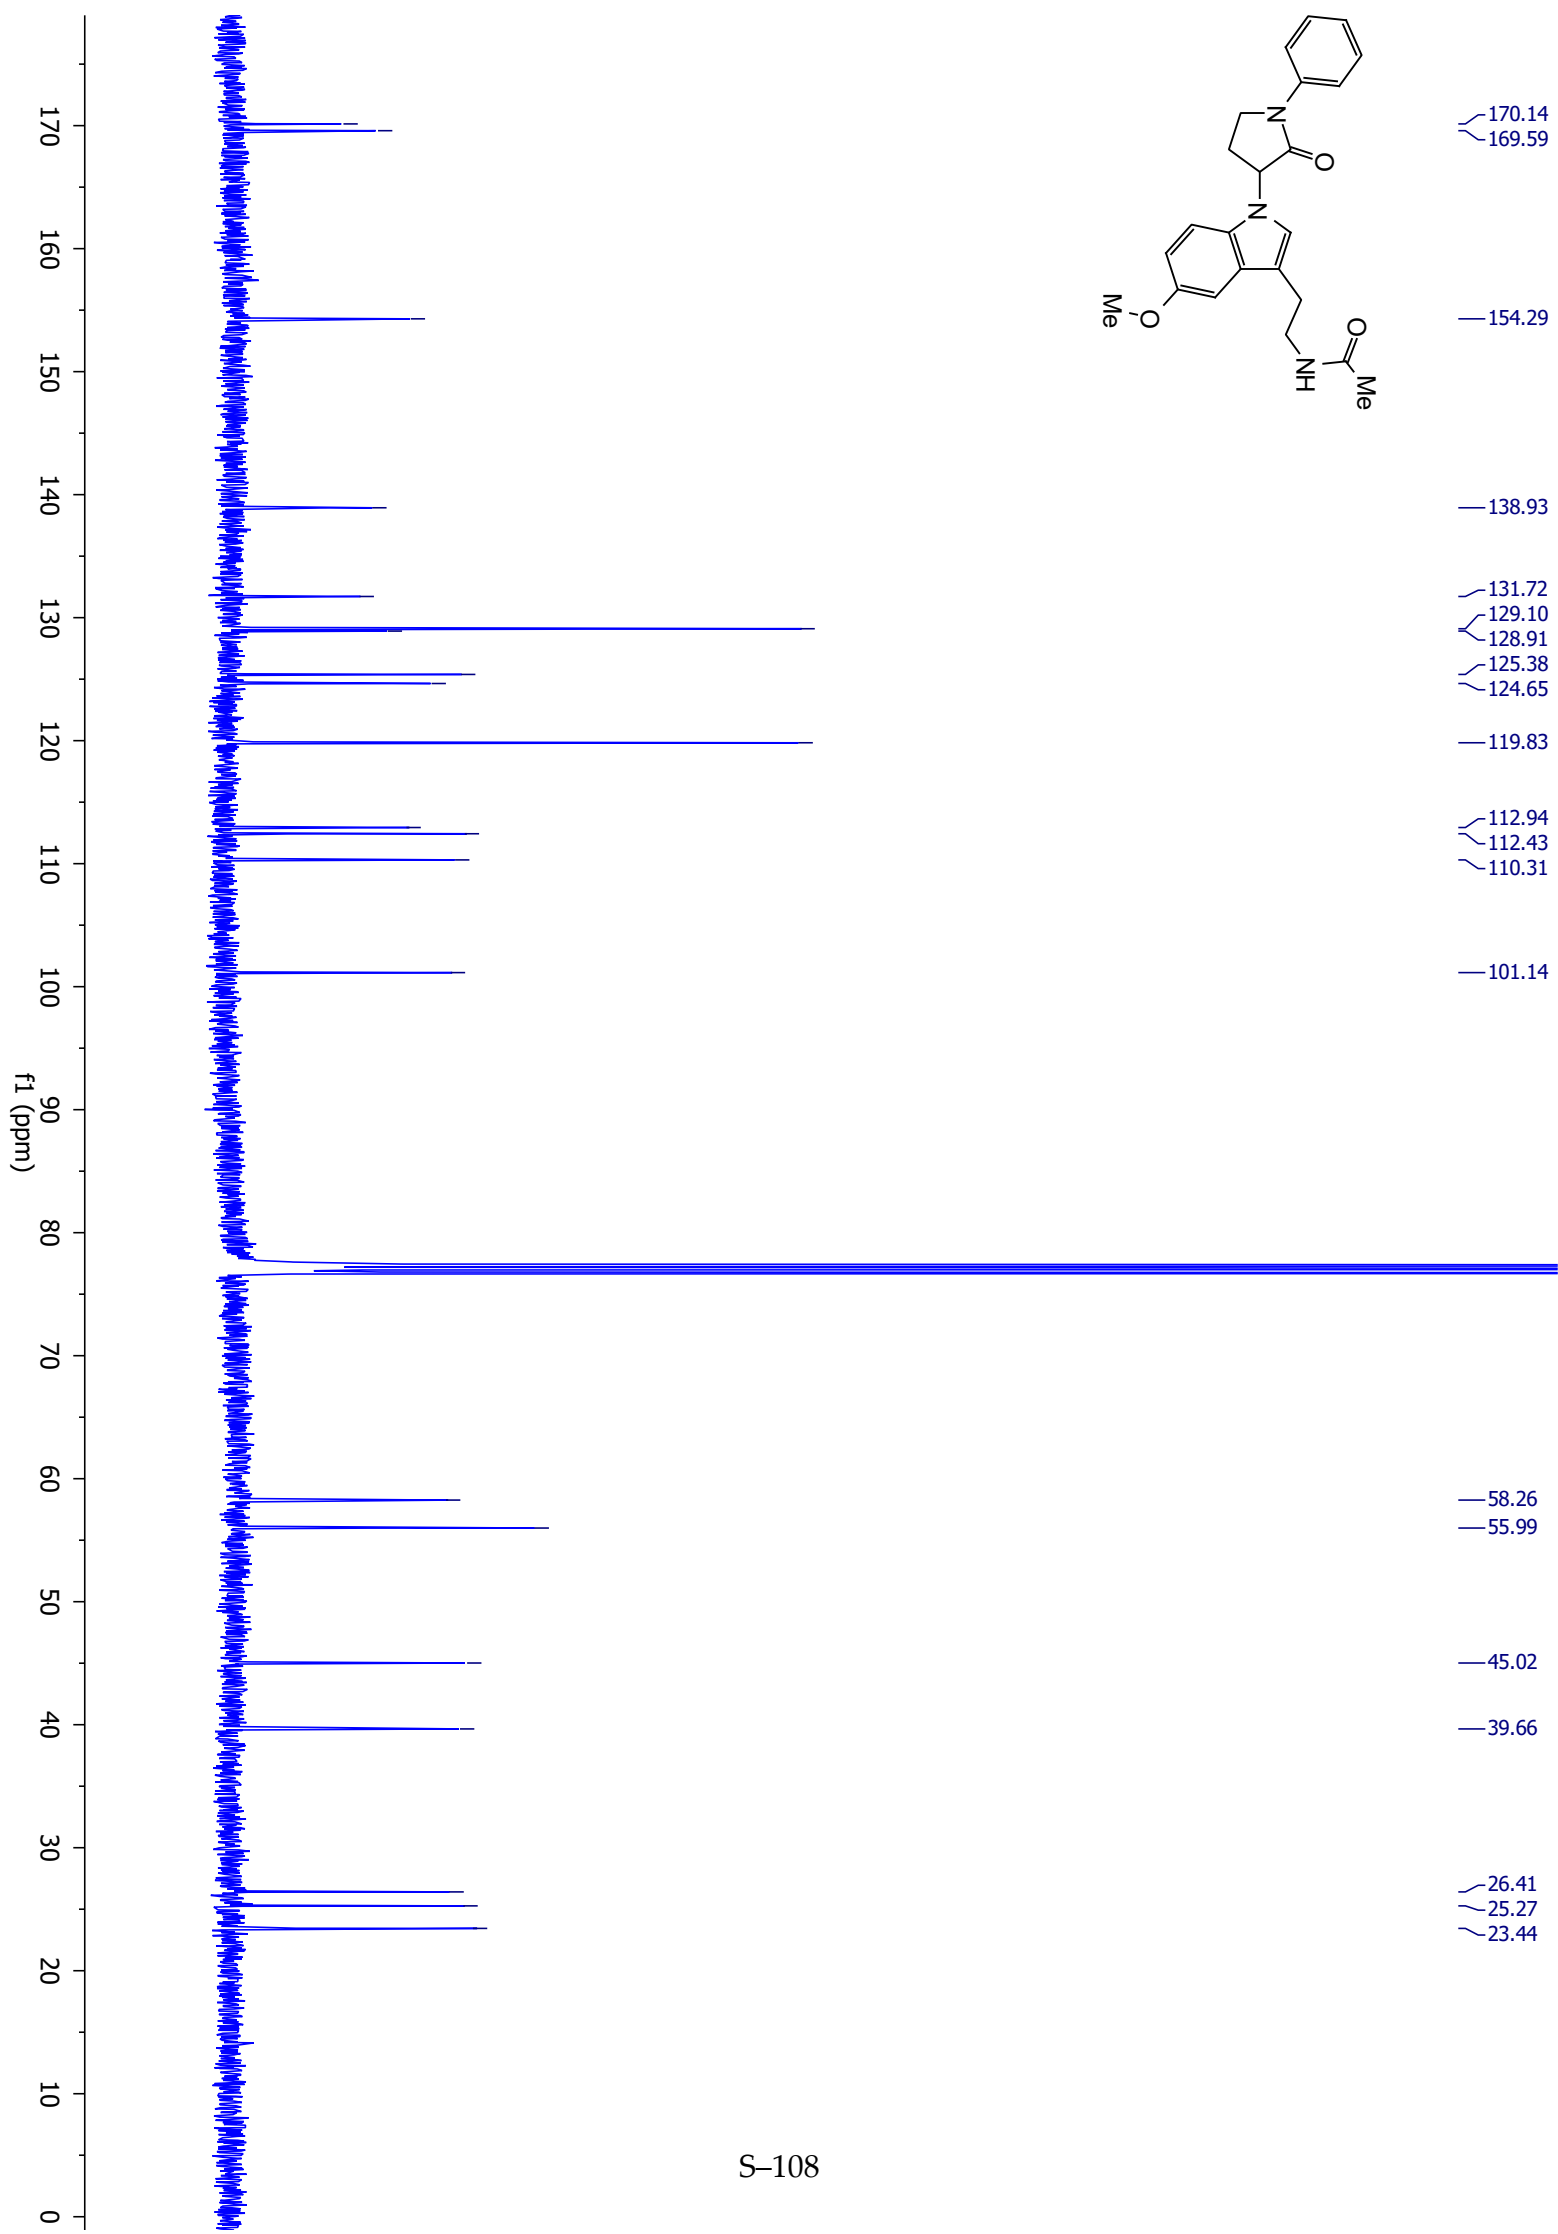

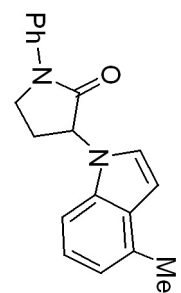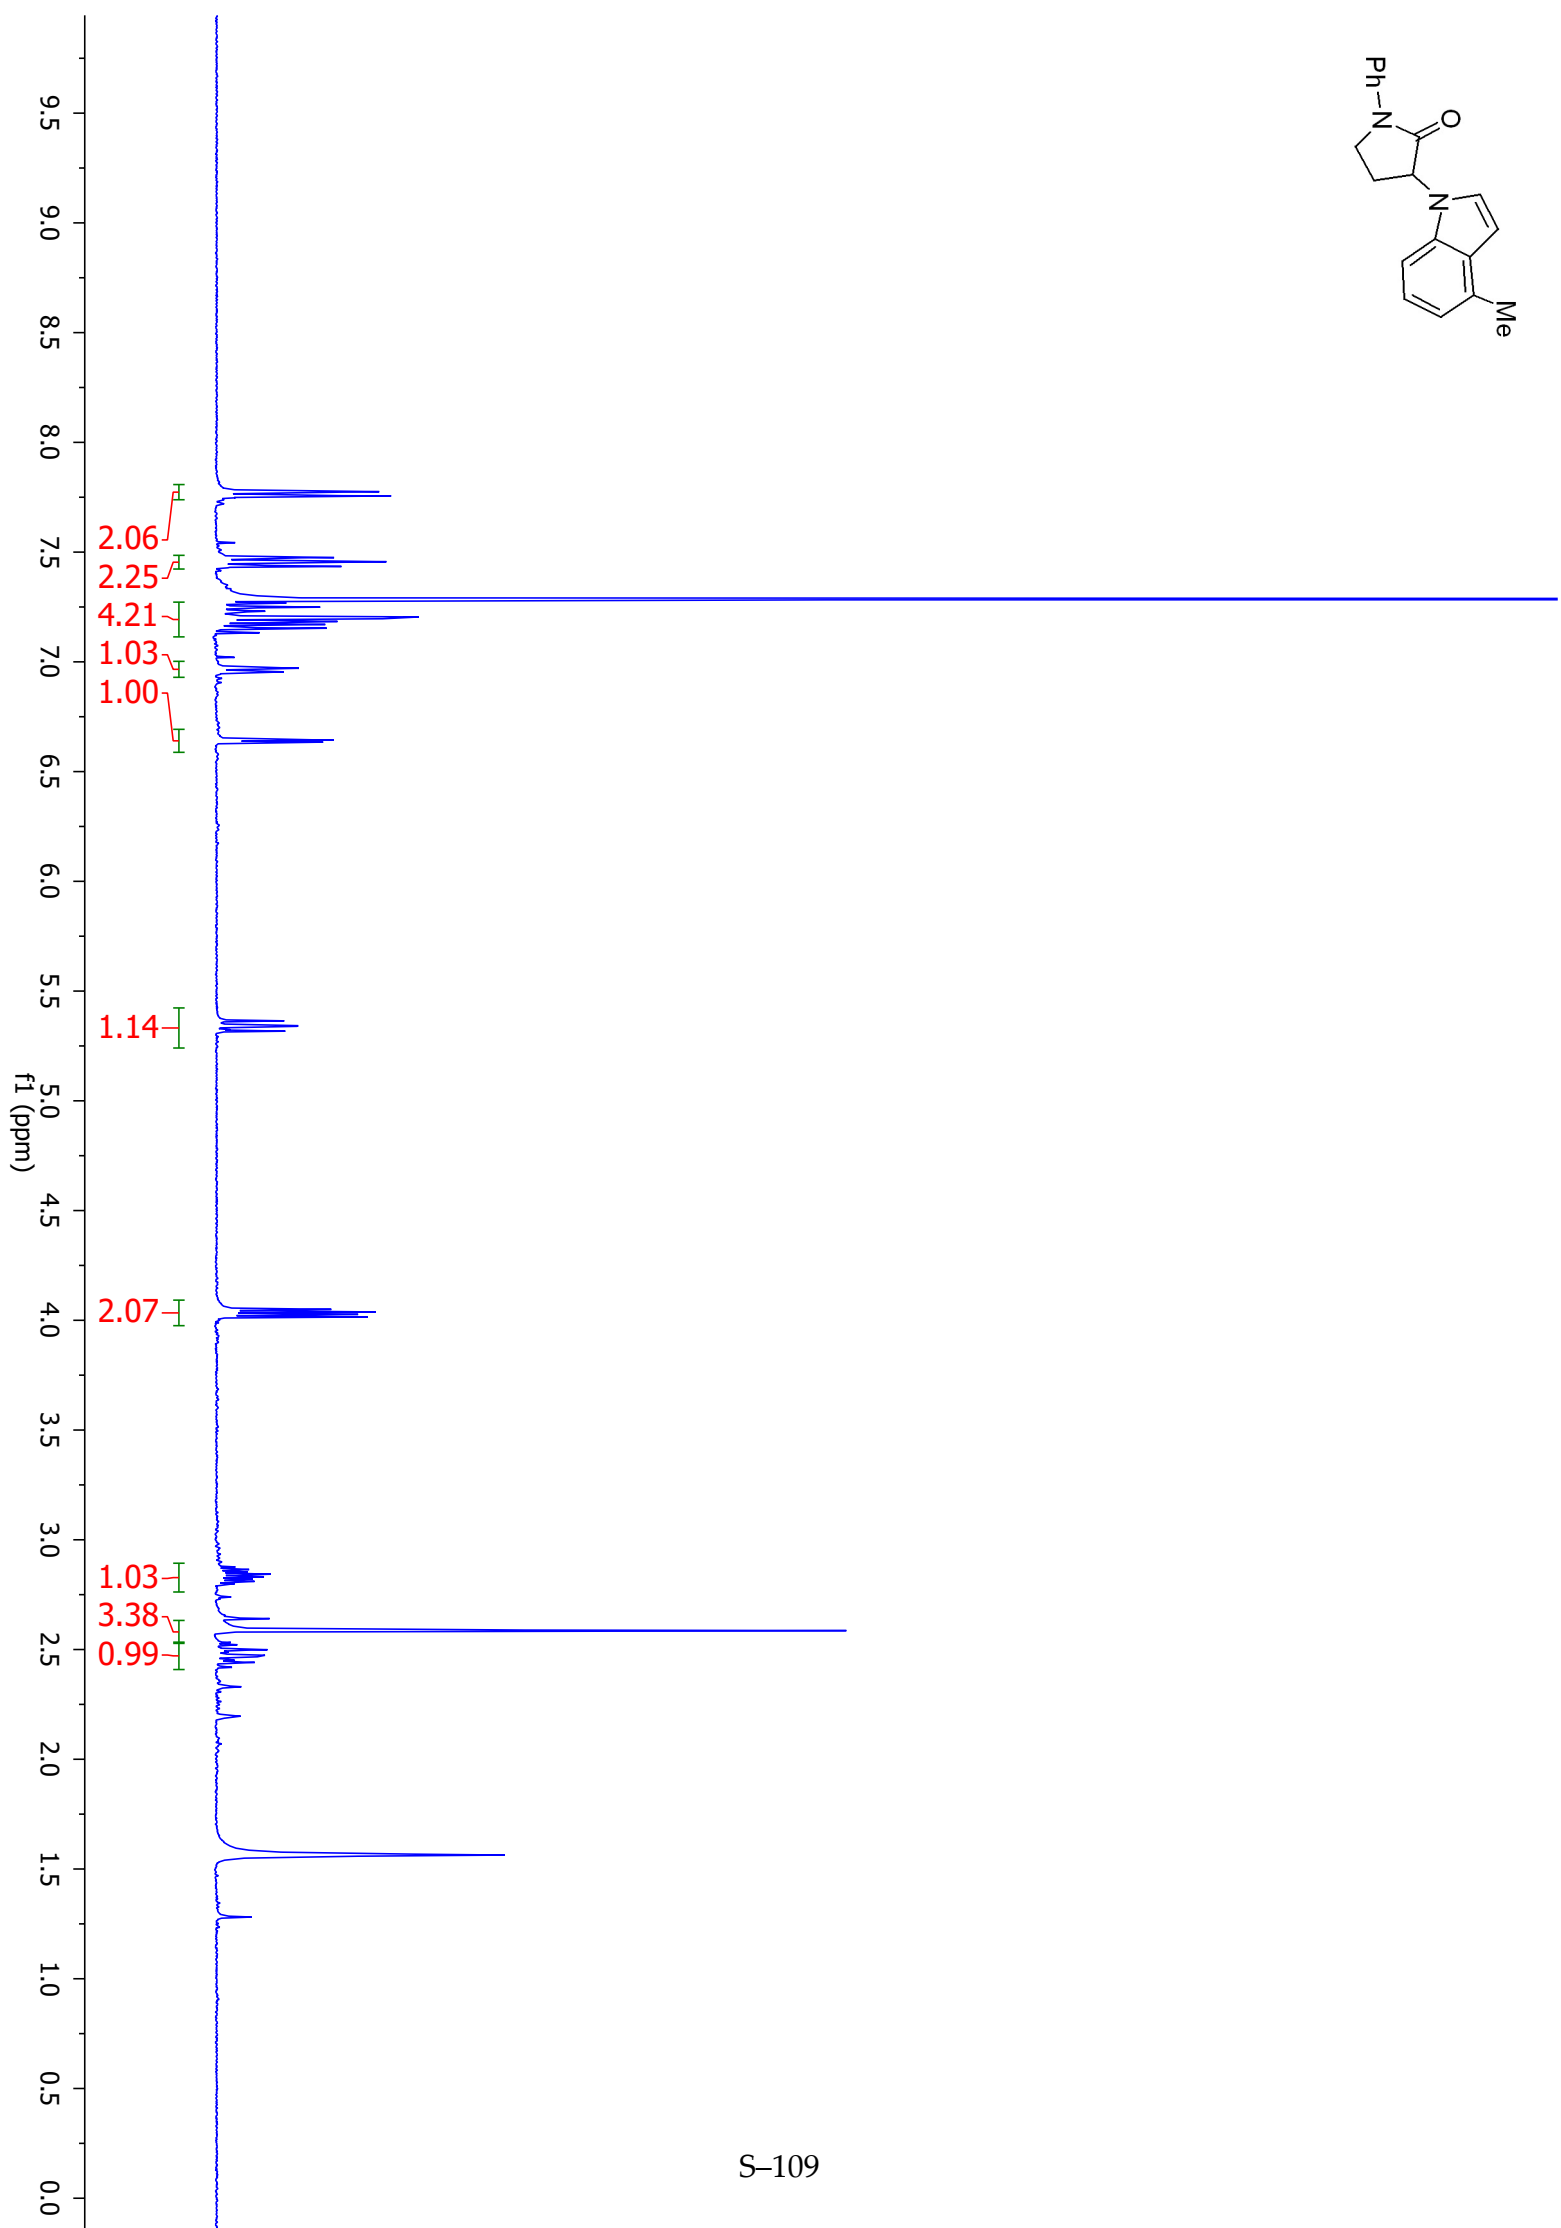

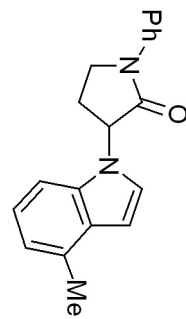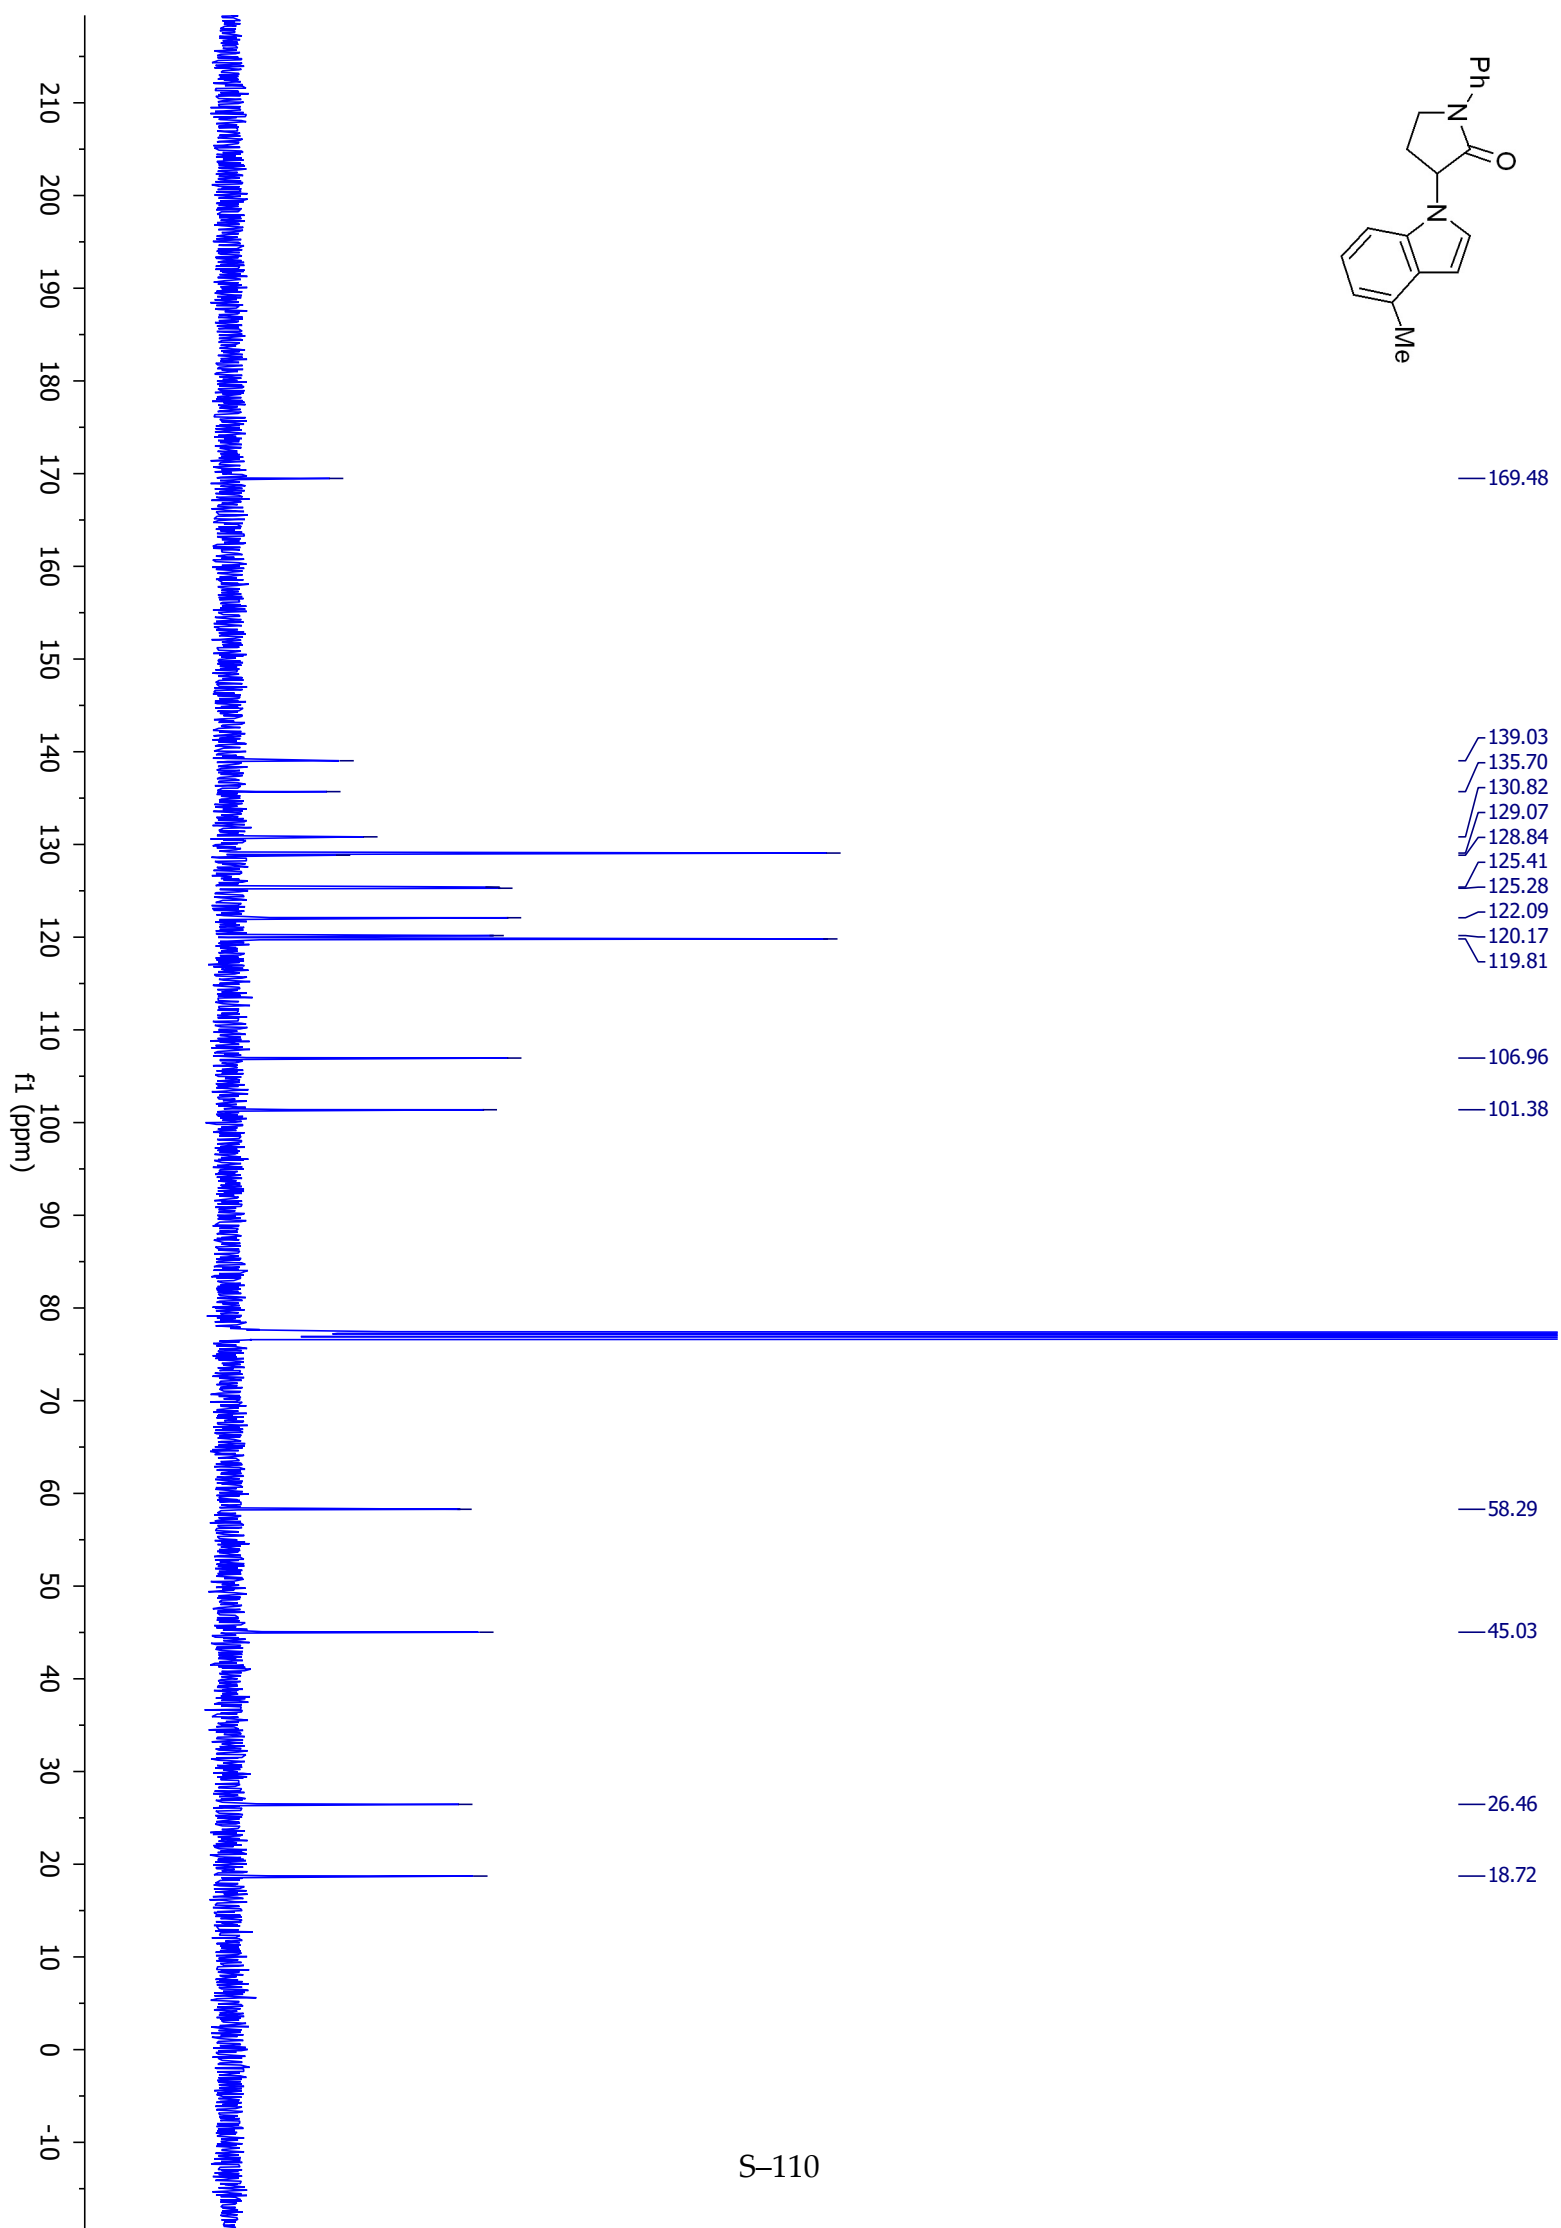

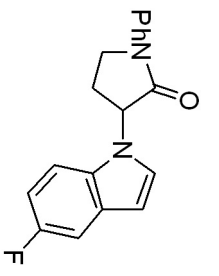

9.5  
9.0  
8.5  
8.0  
7.5  
7.0  
6.5  
6.0  
5.5  
5.0  
4.5  
4.0  
3.5  
3.0  
2.5  
2.0  
1.5  
1.0  
0.5  
0.0

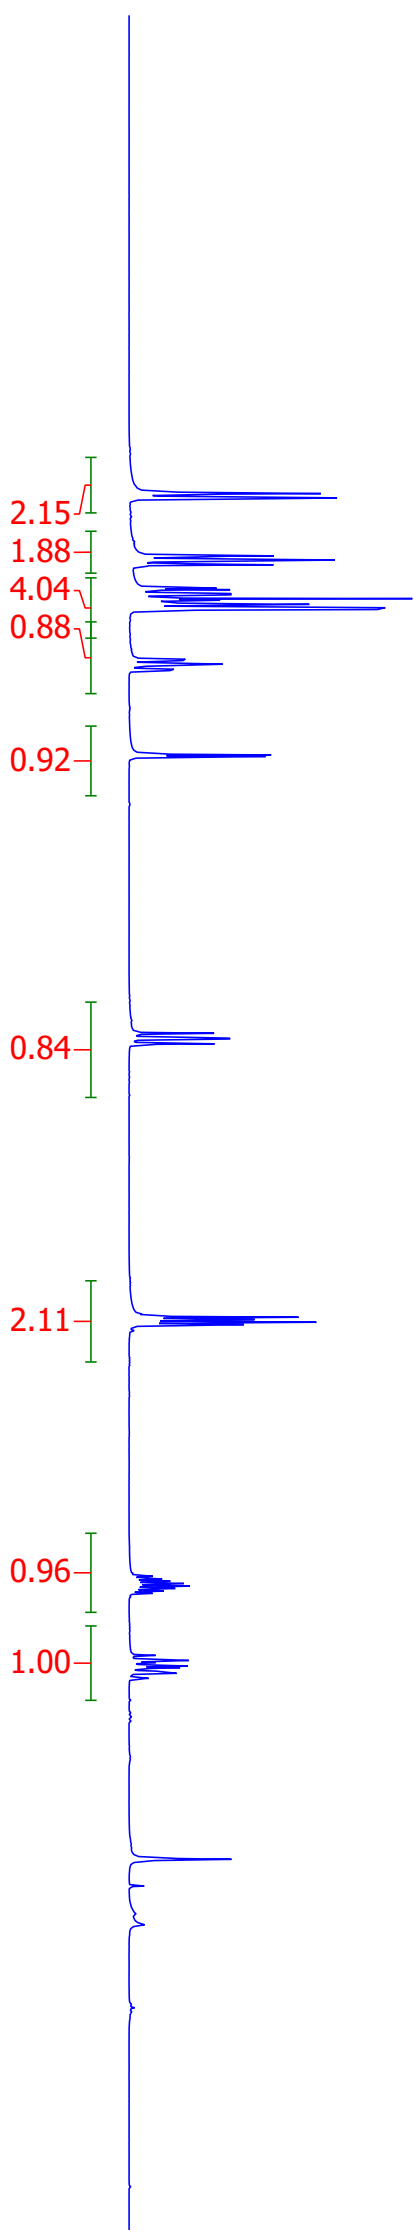

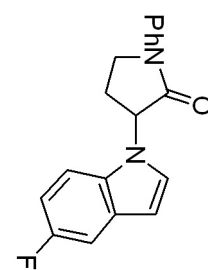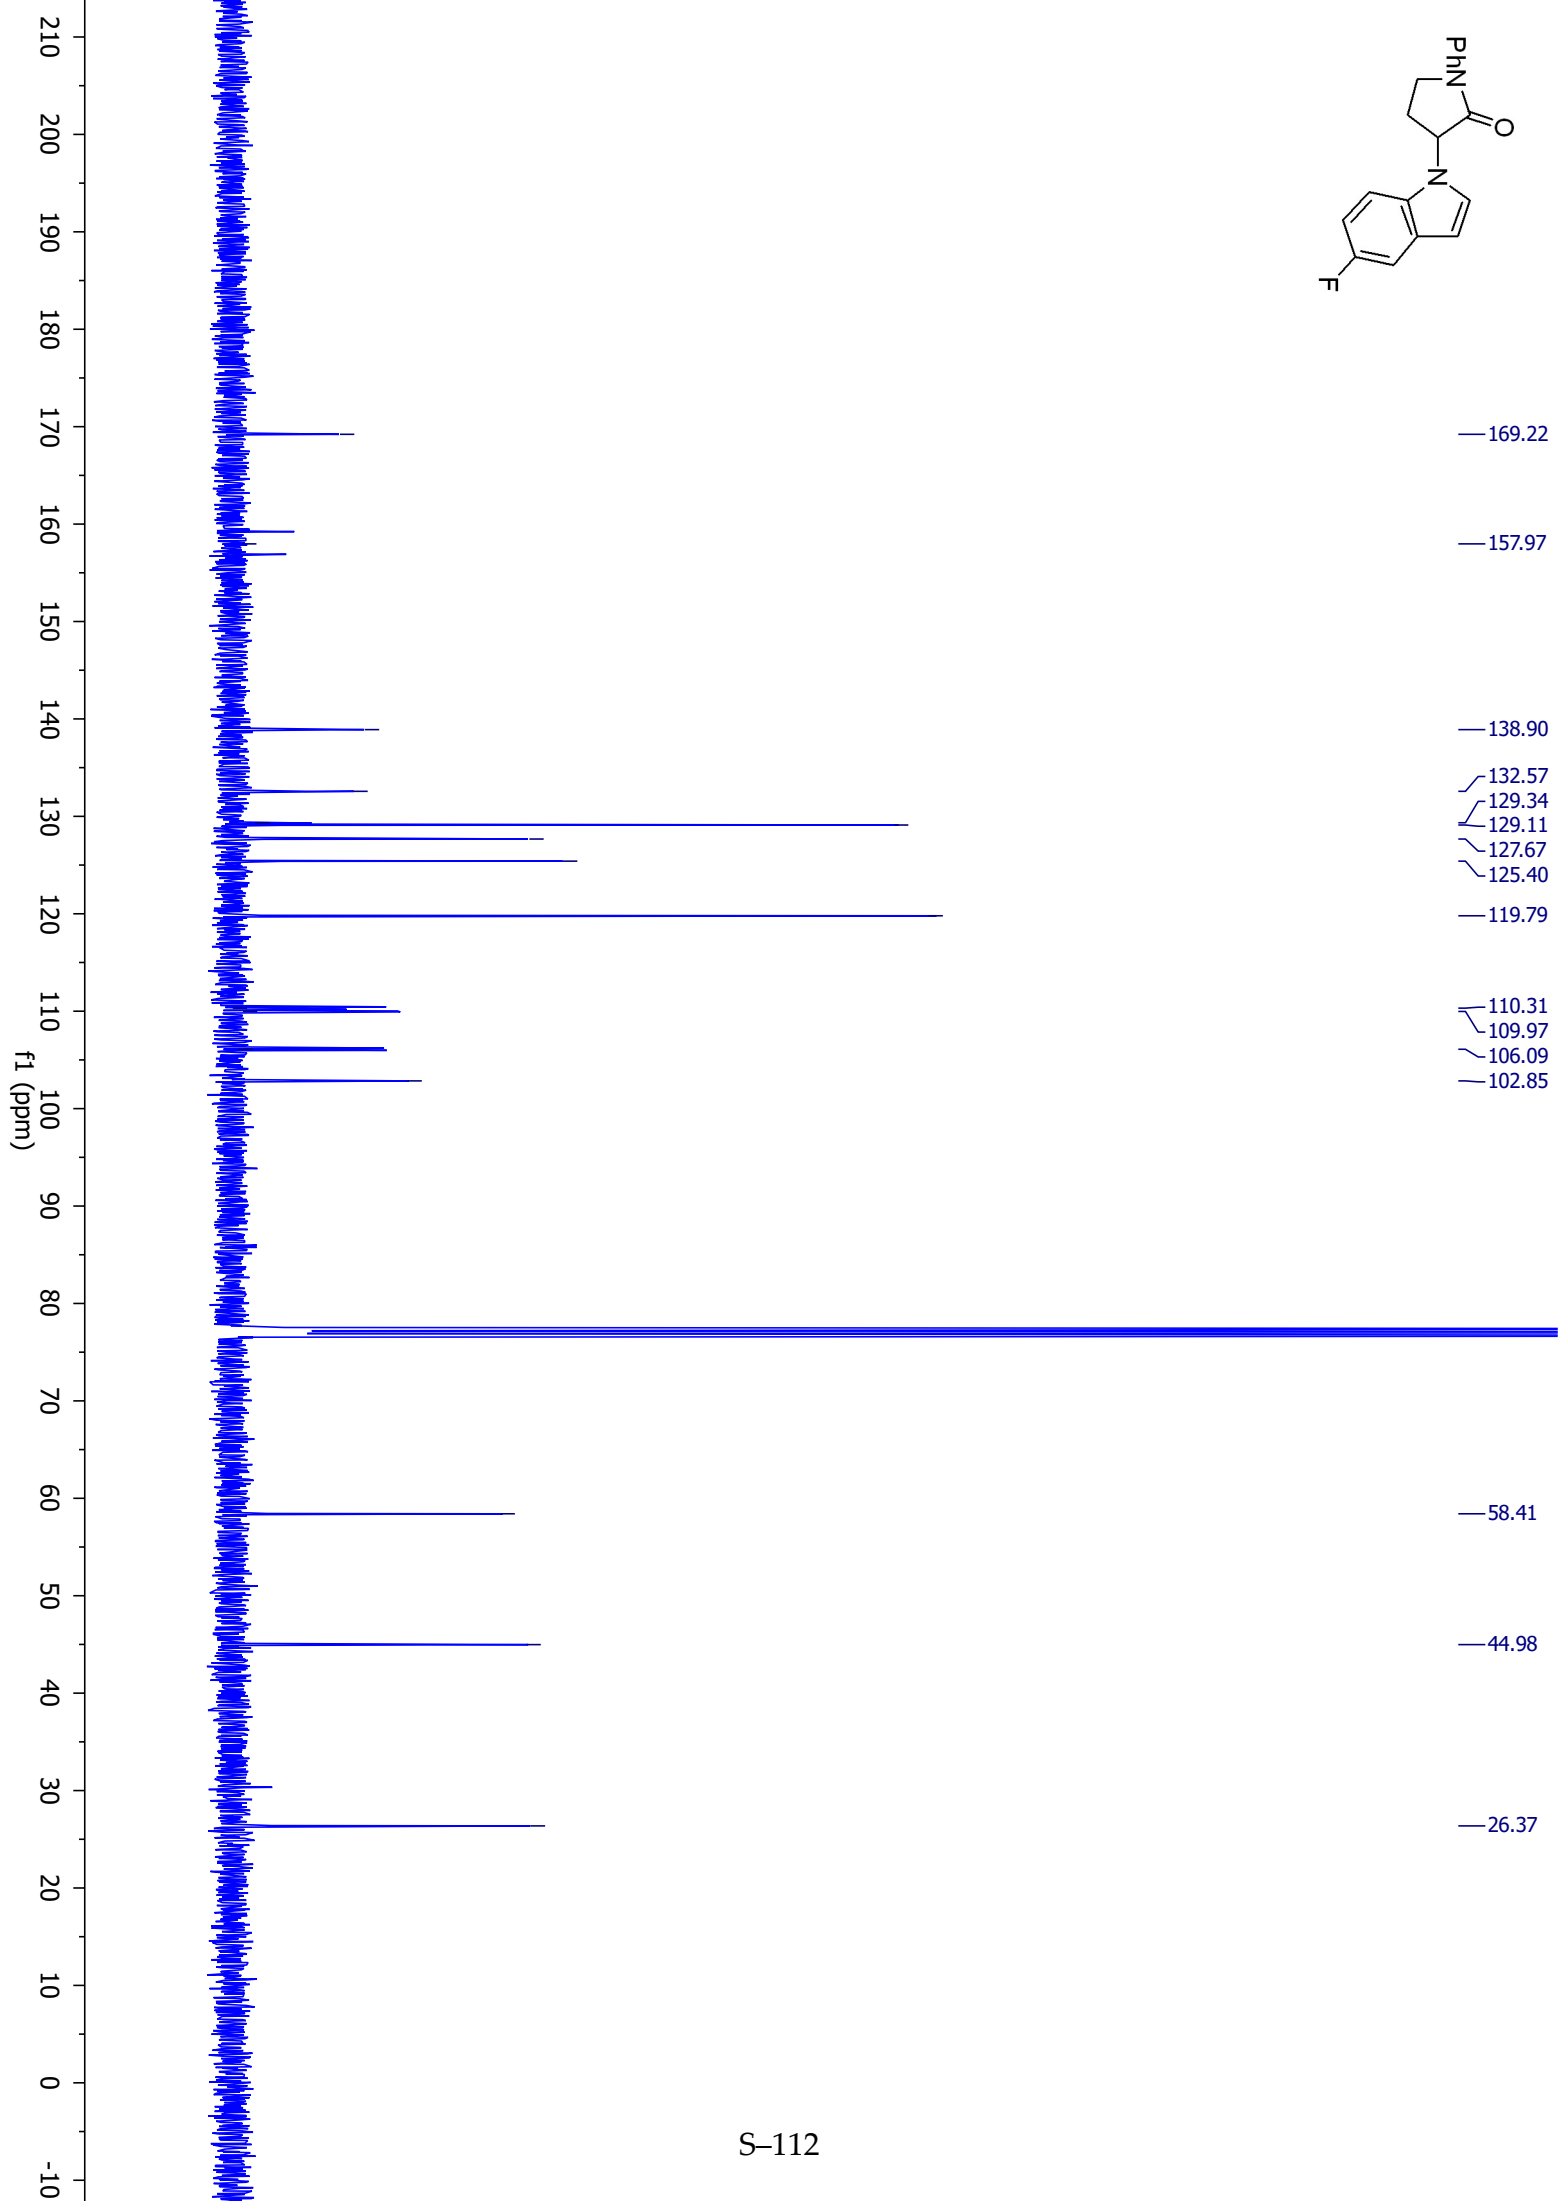



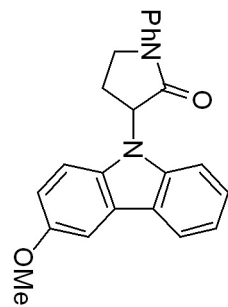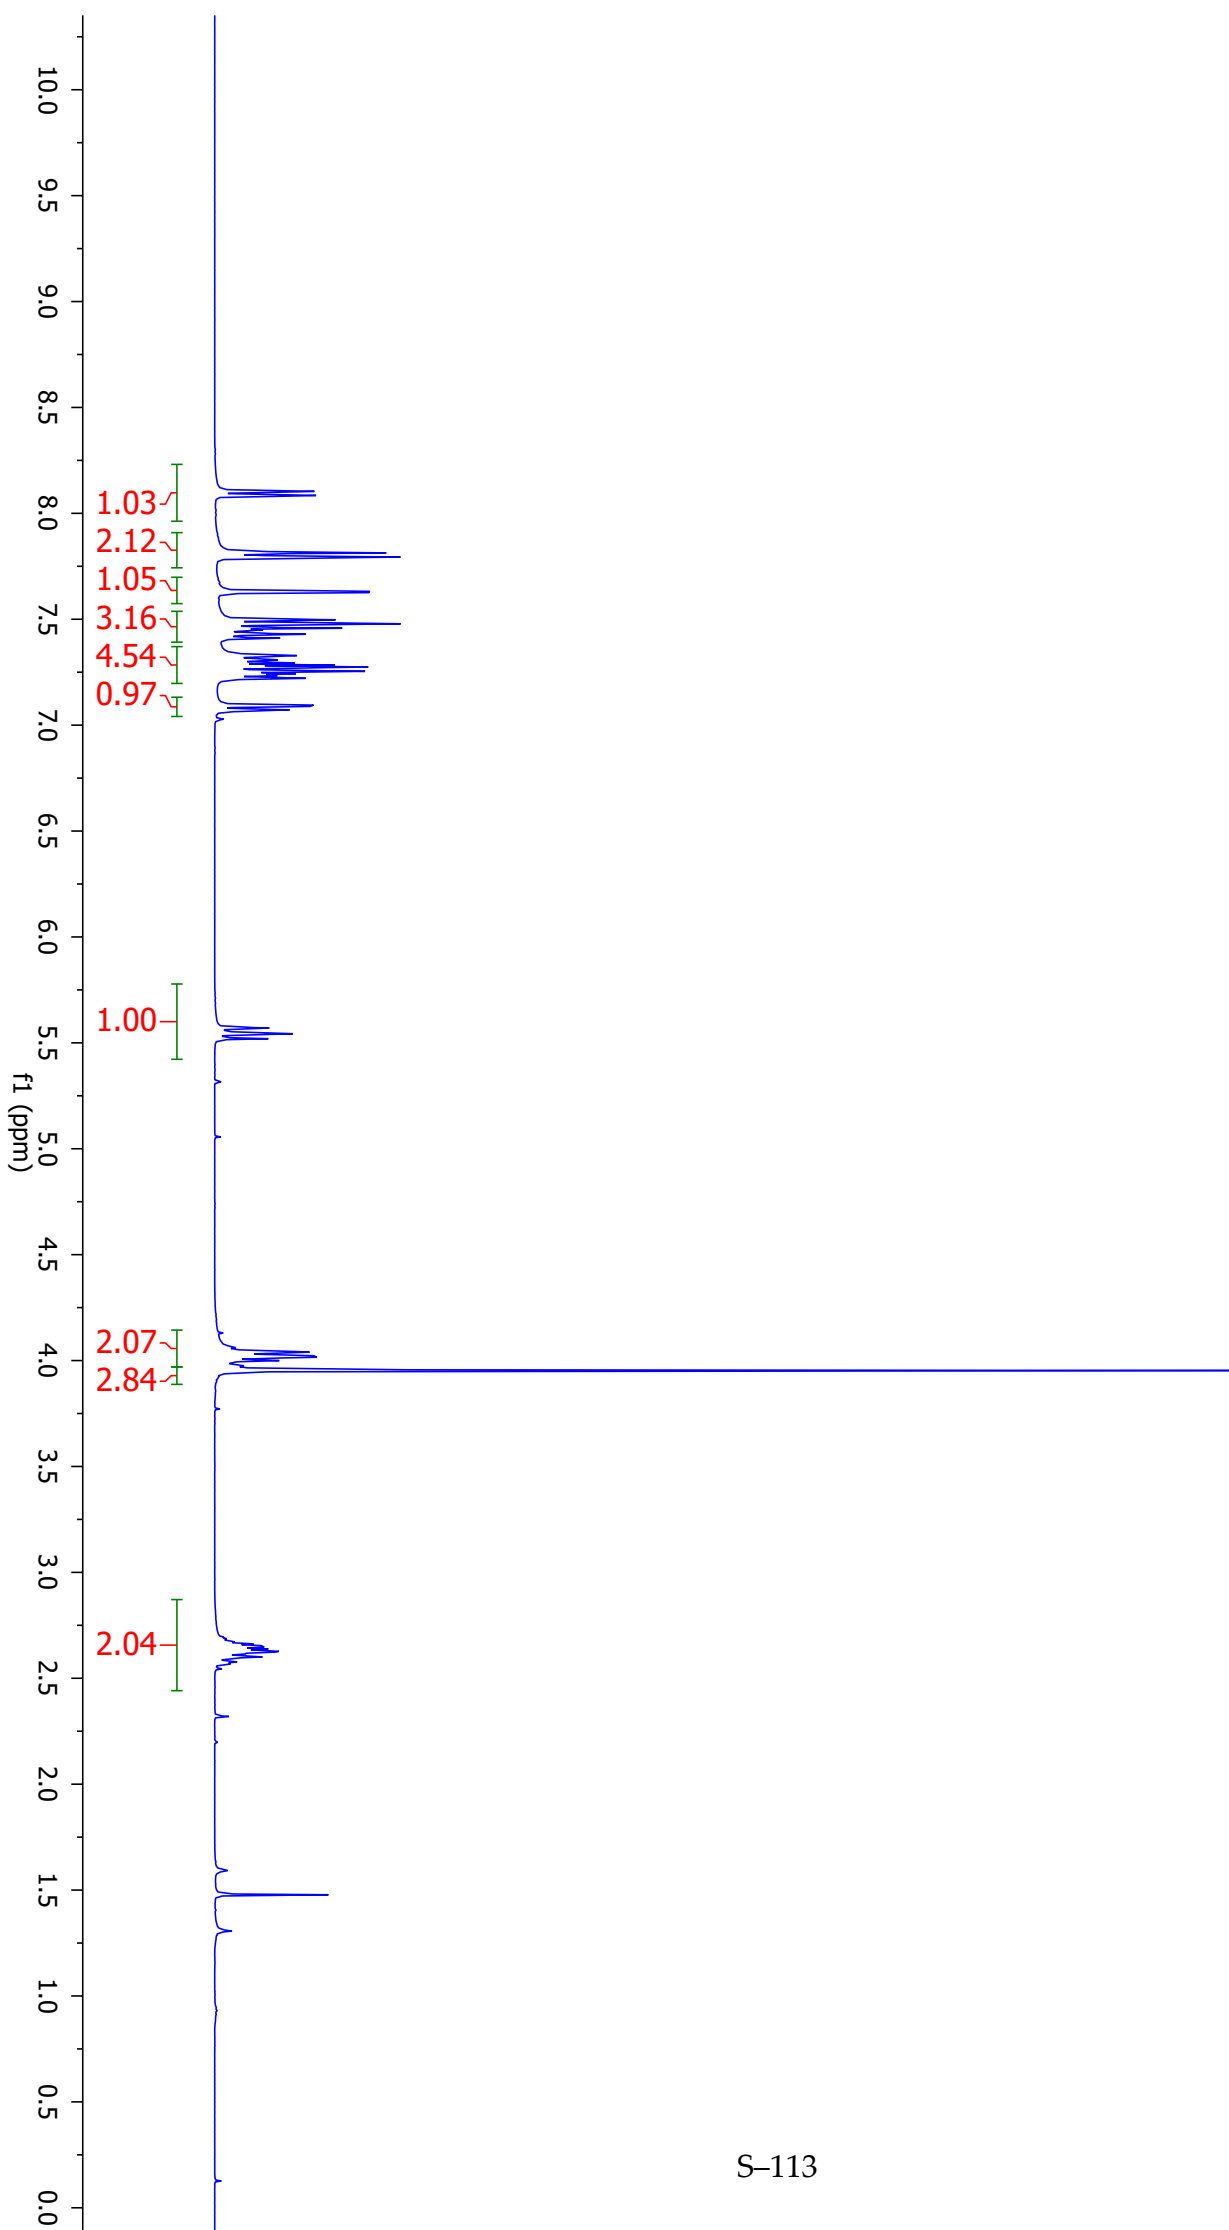

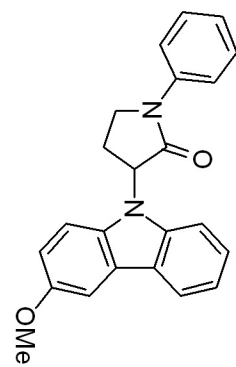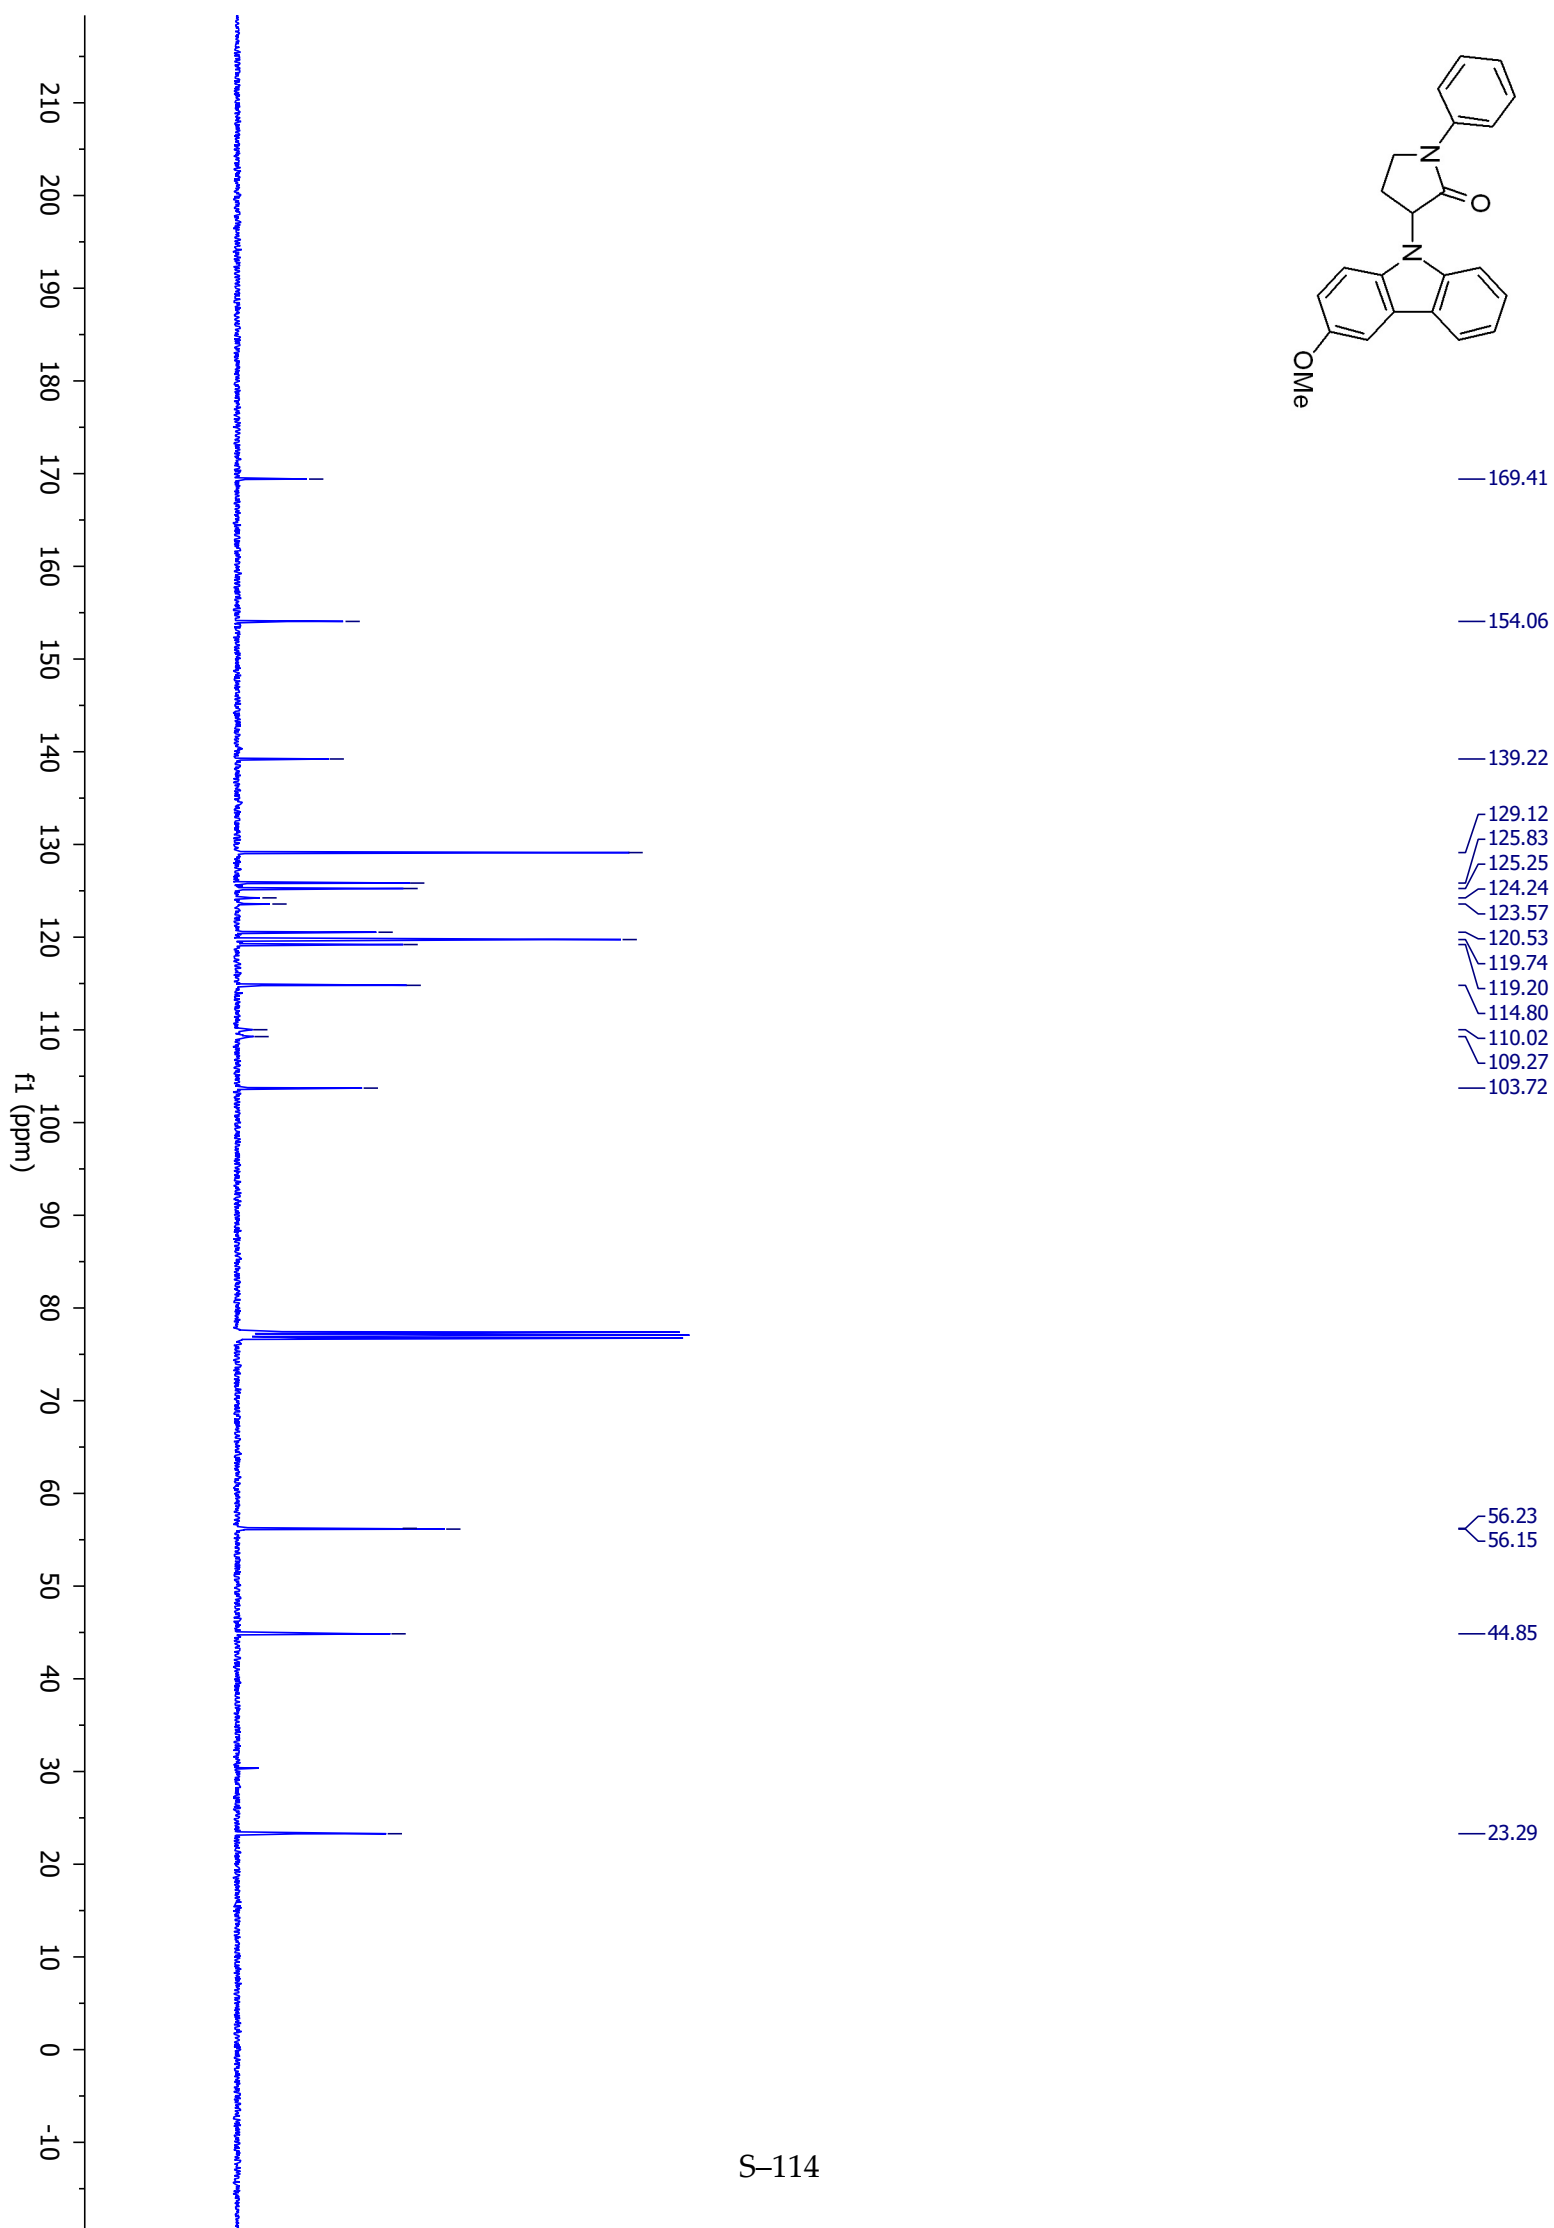

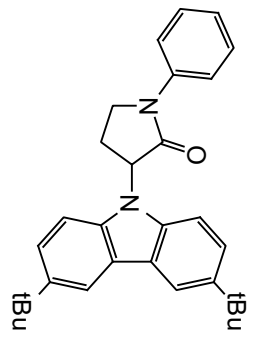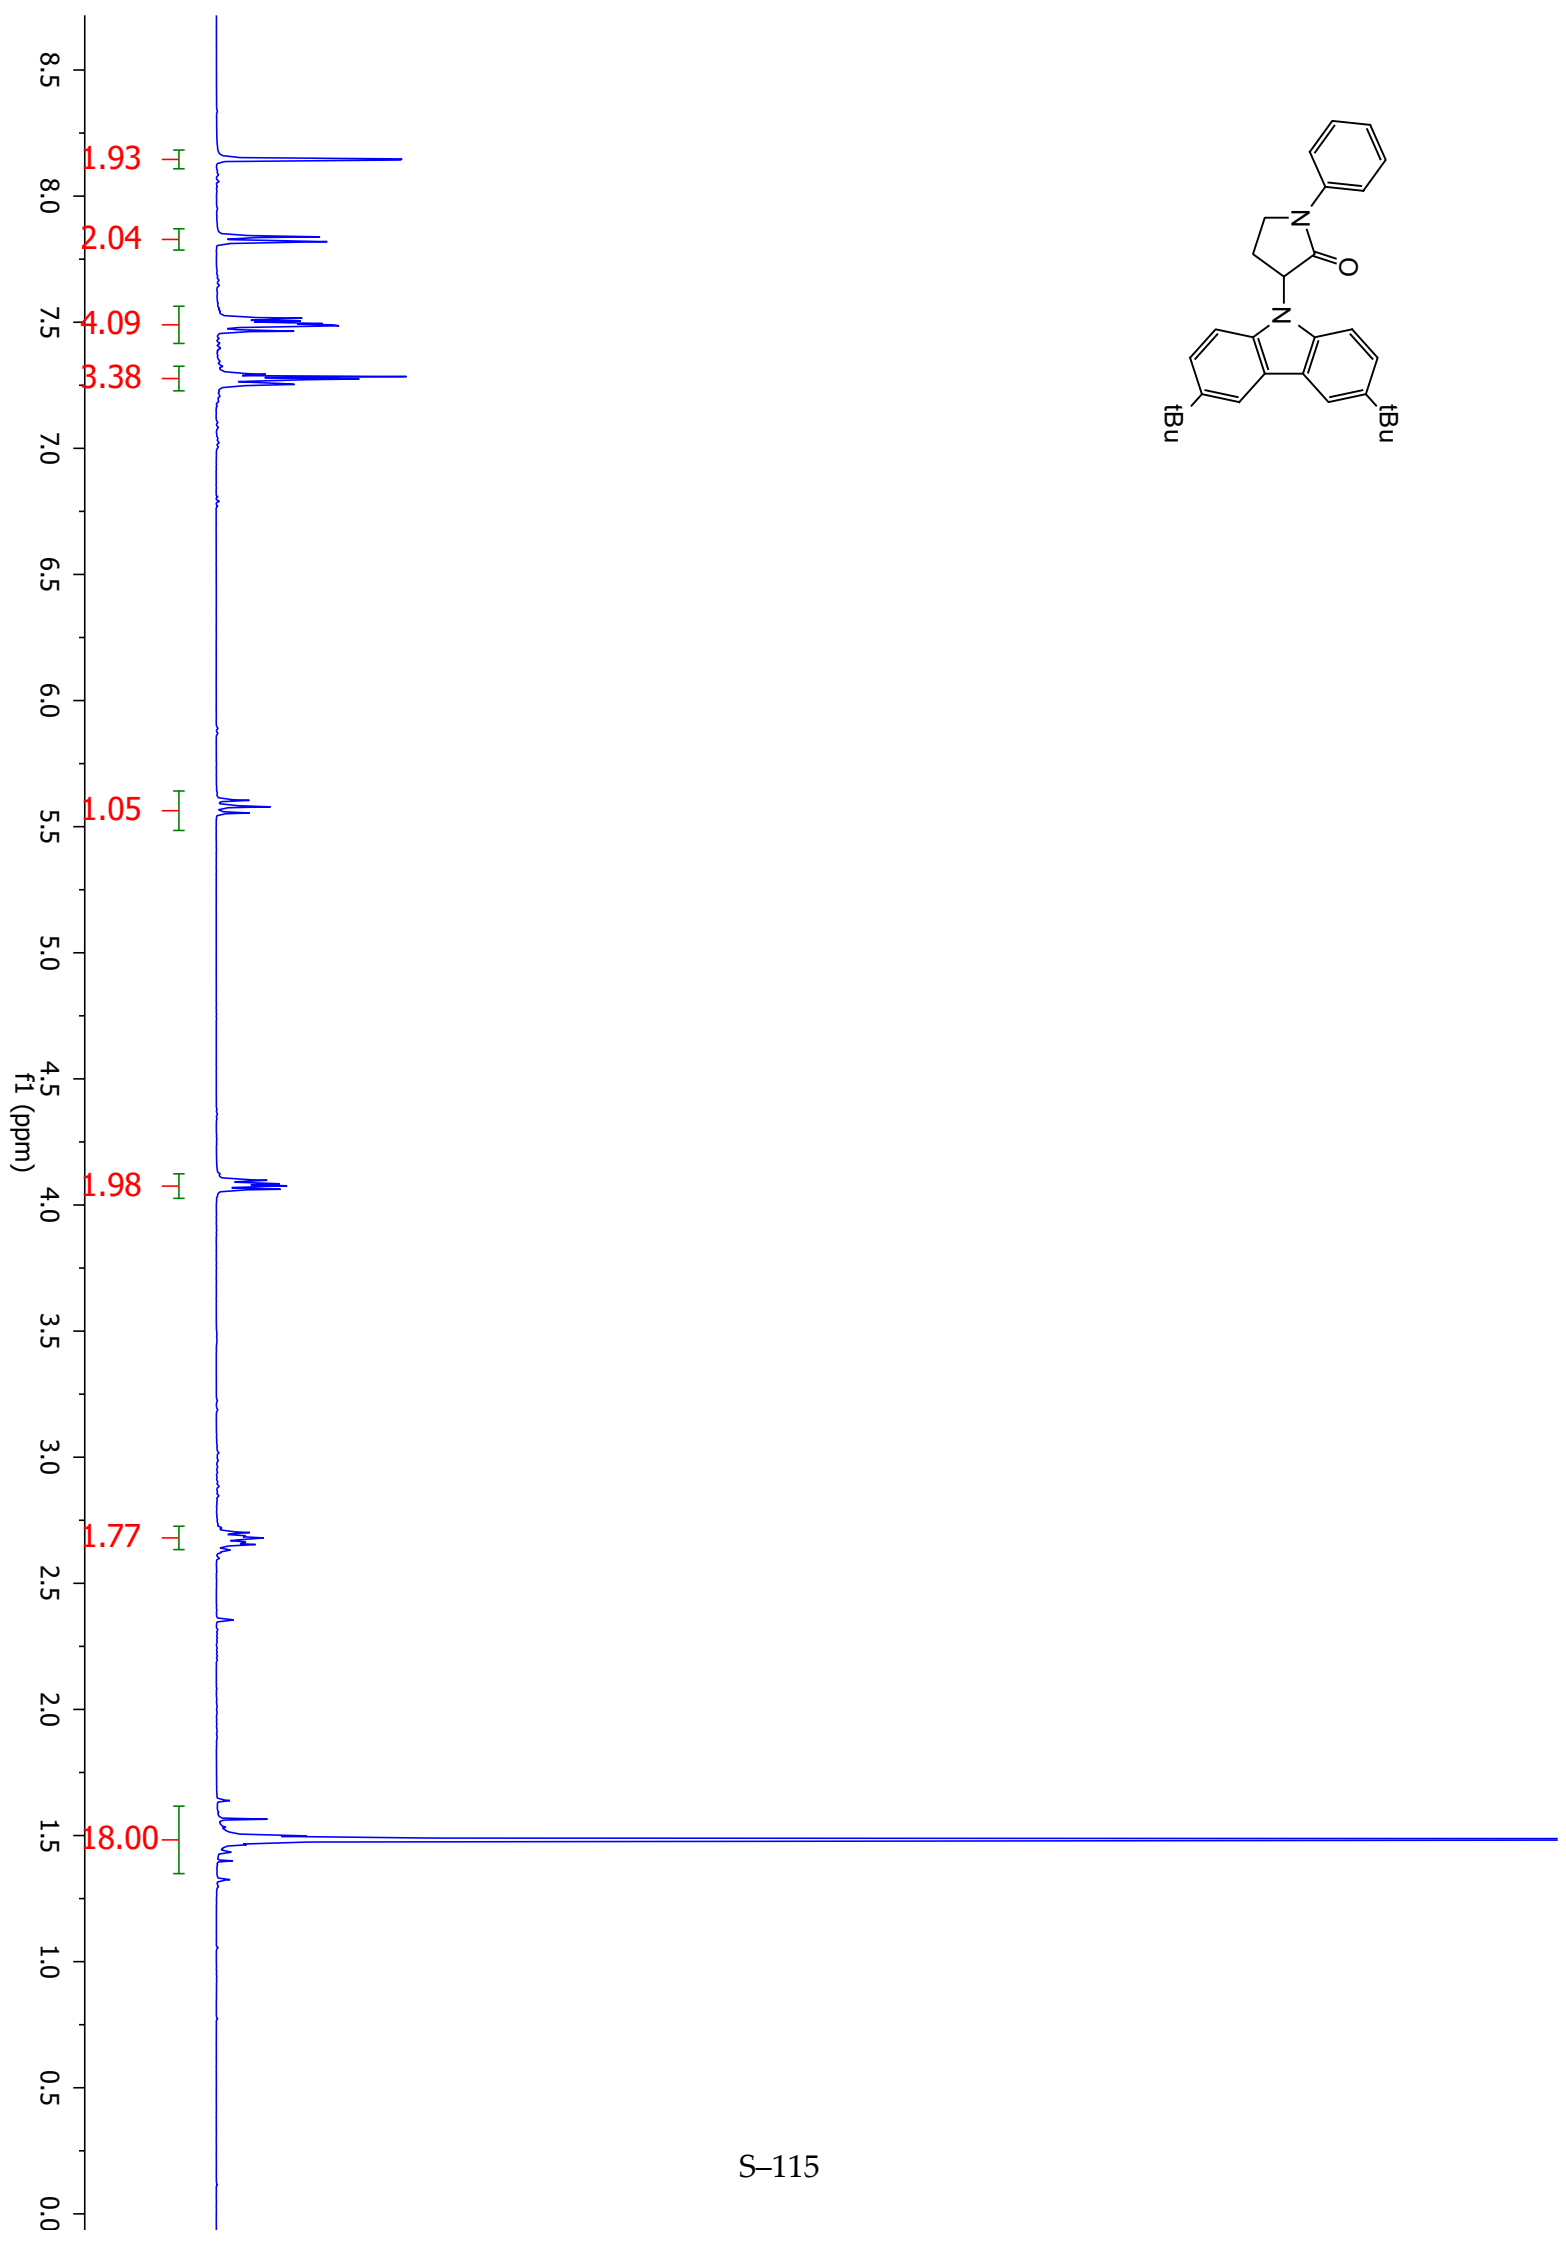

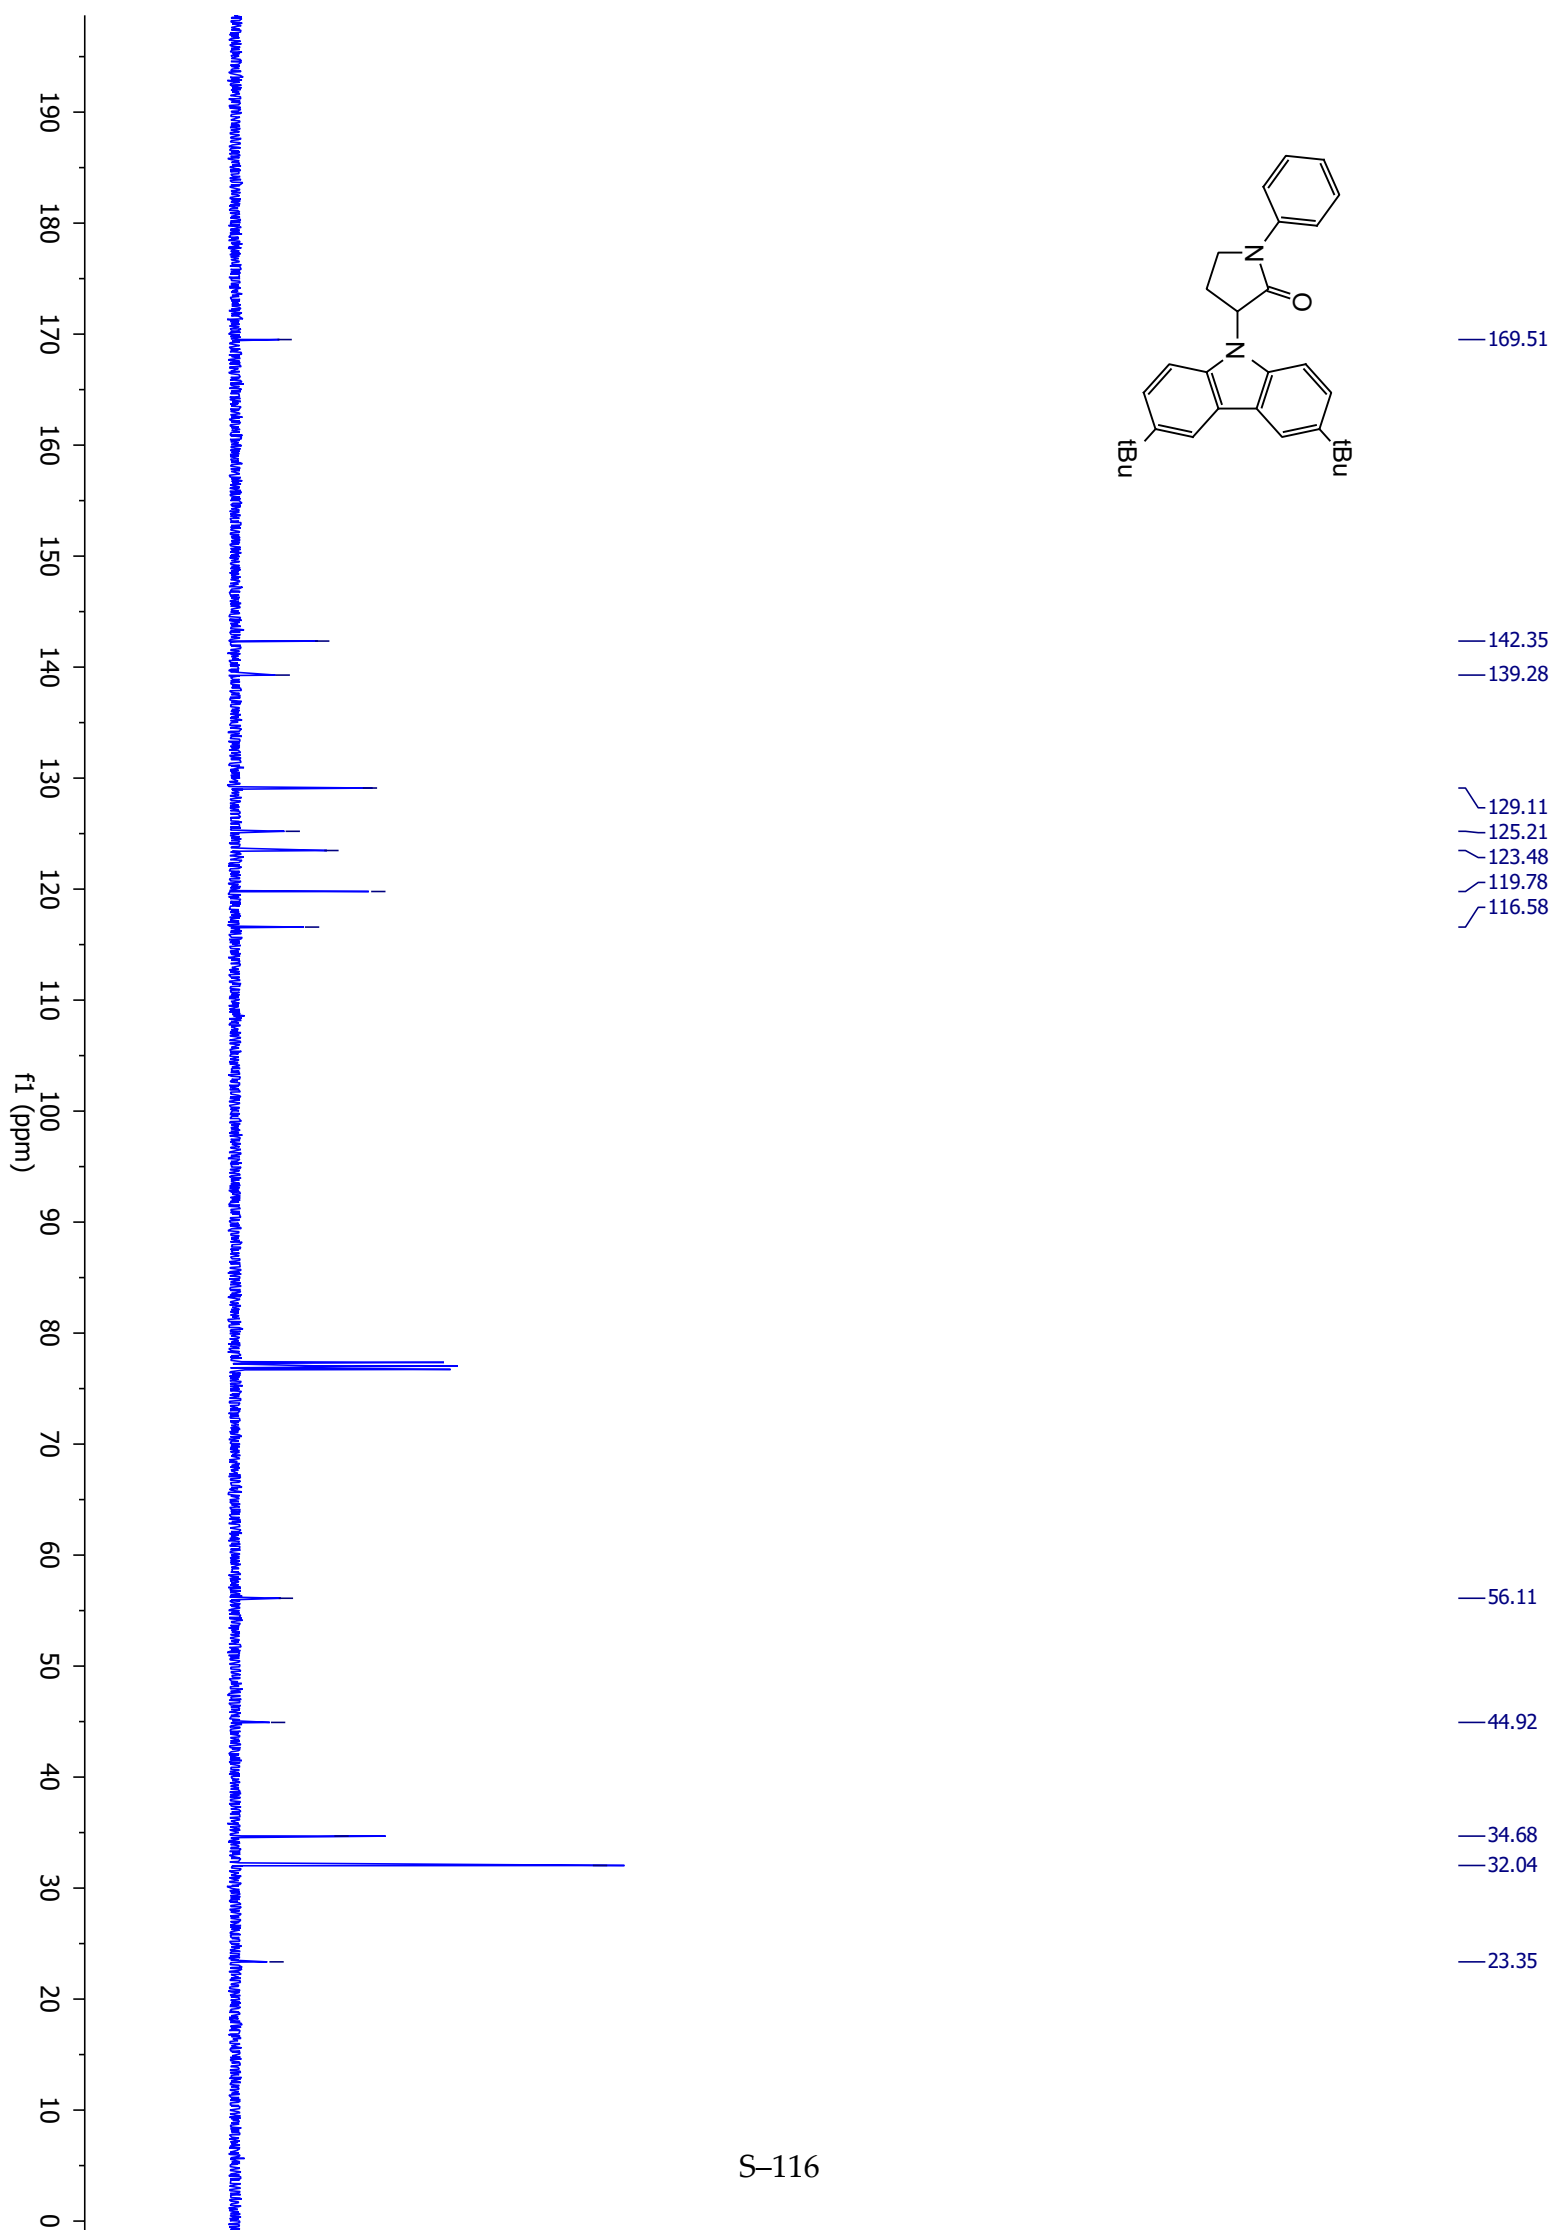

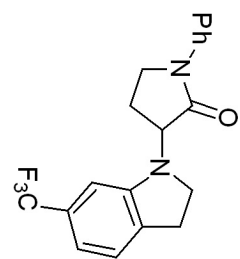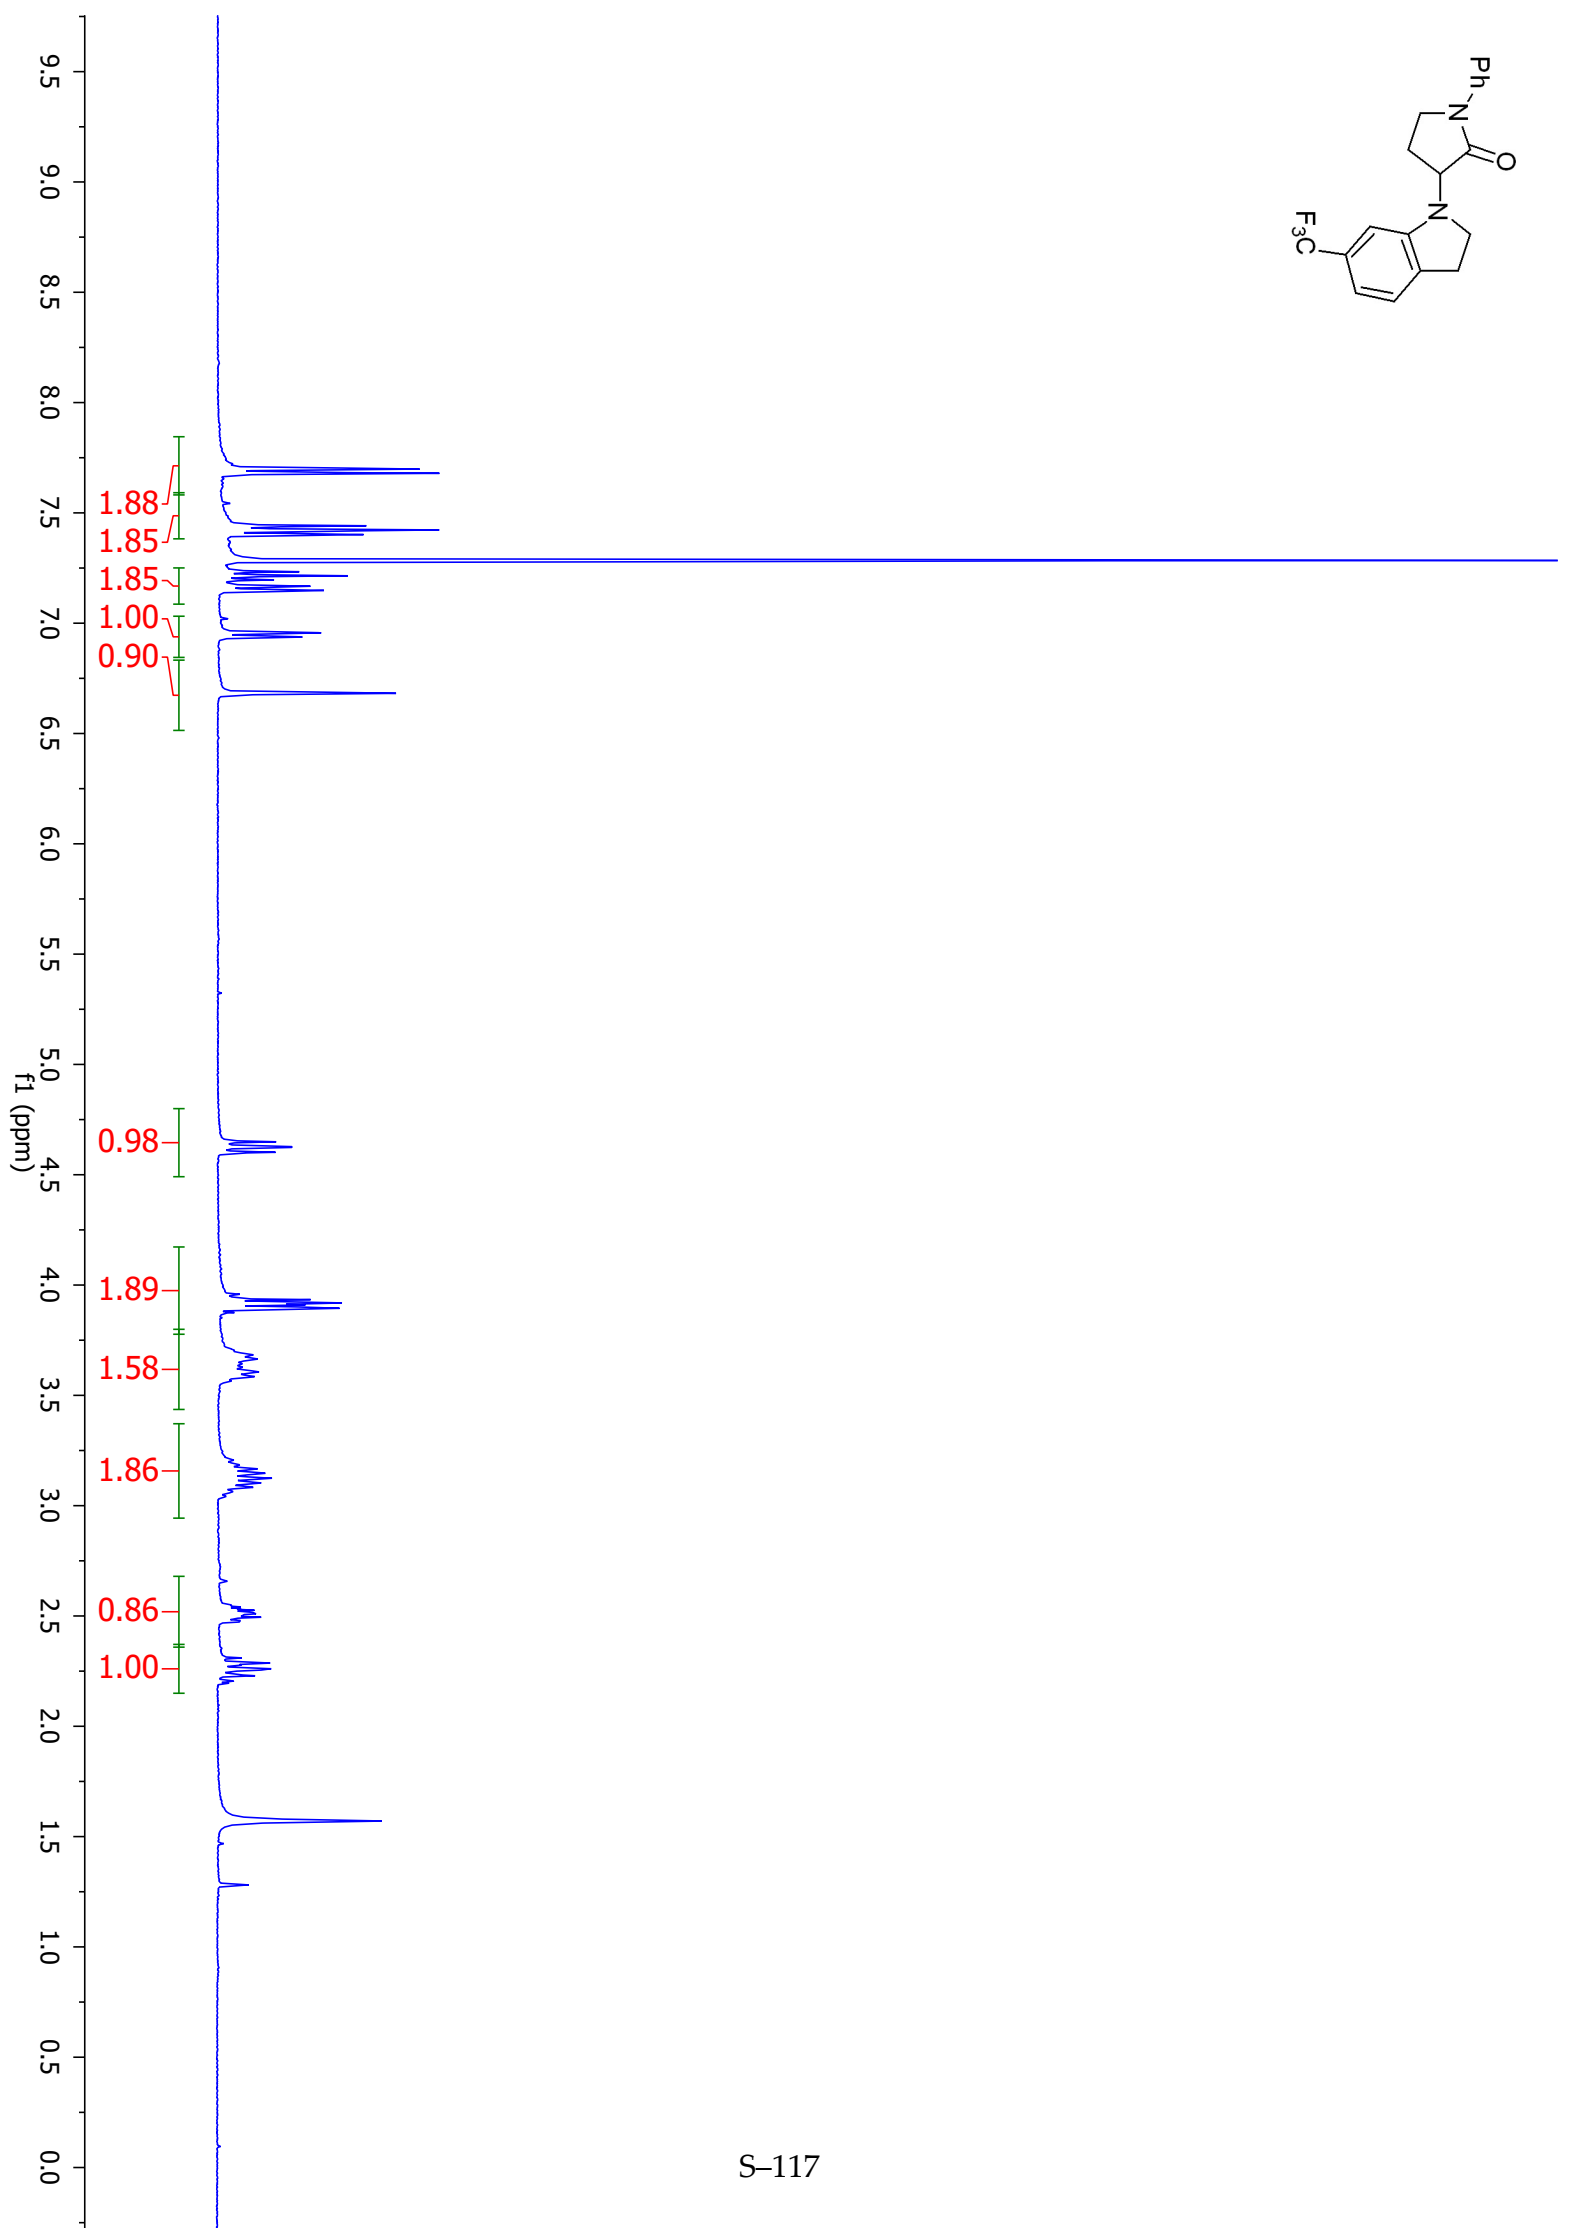

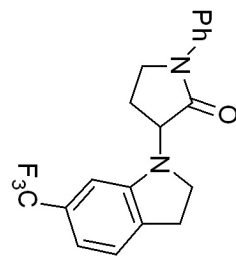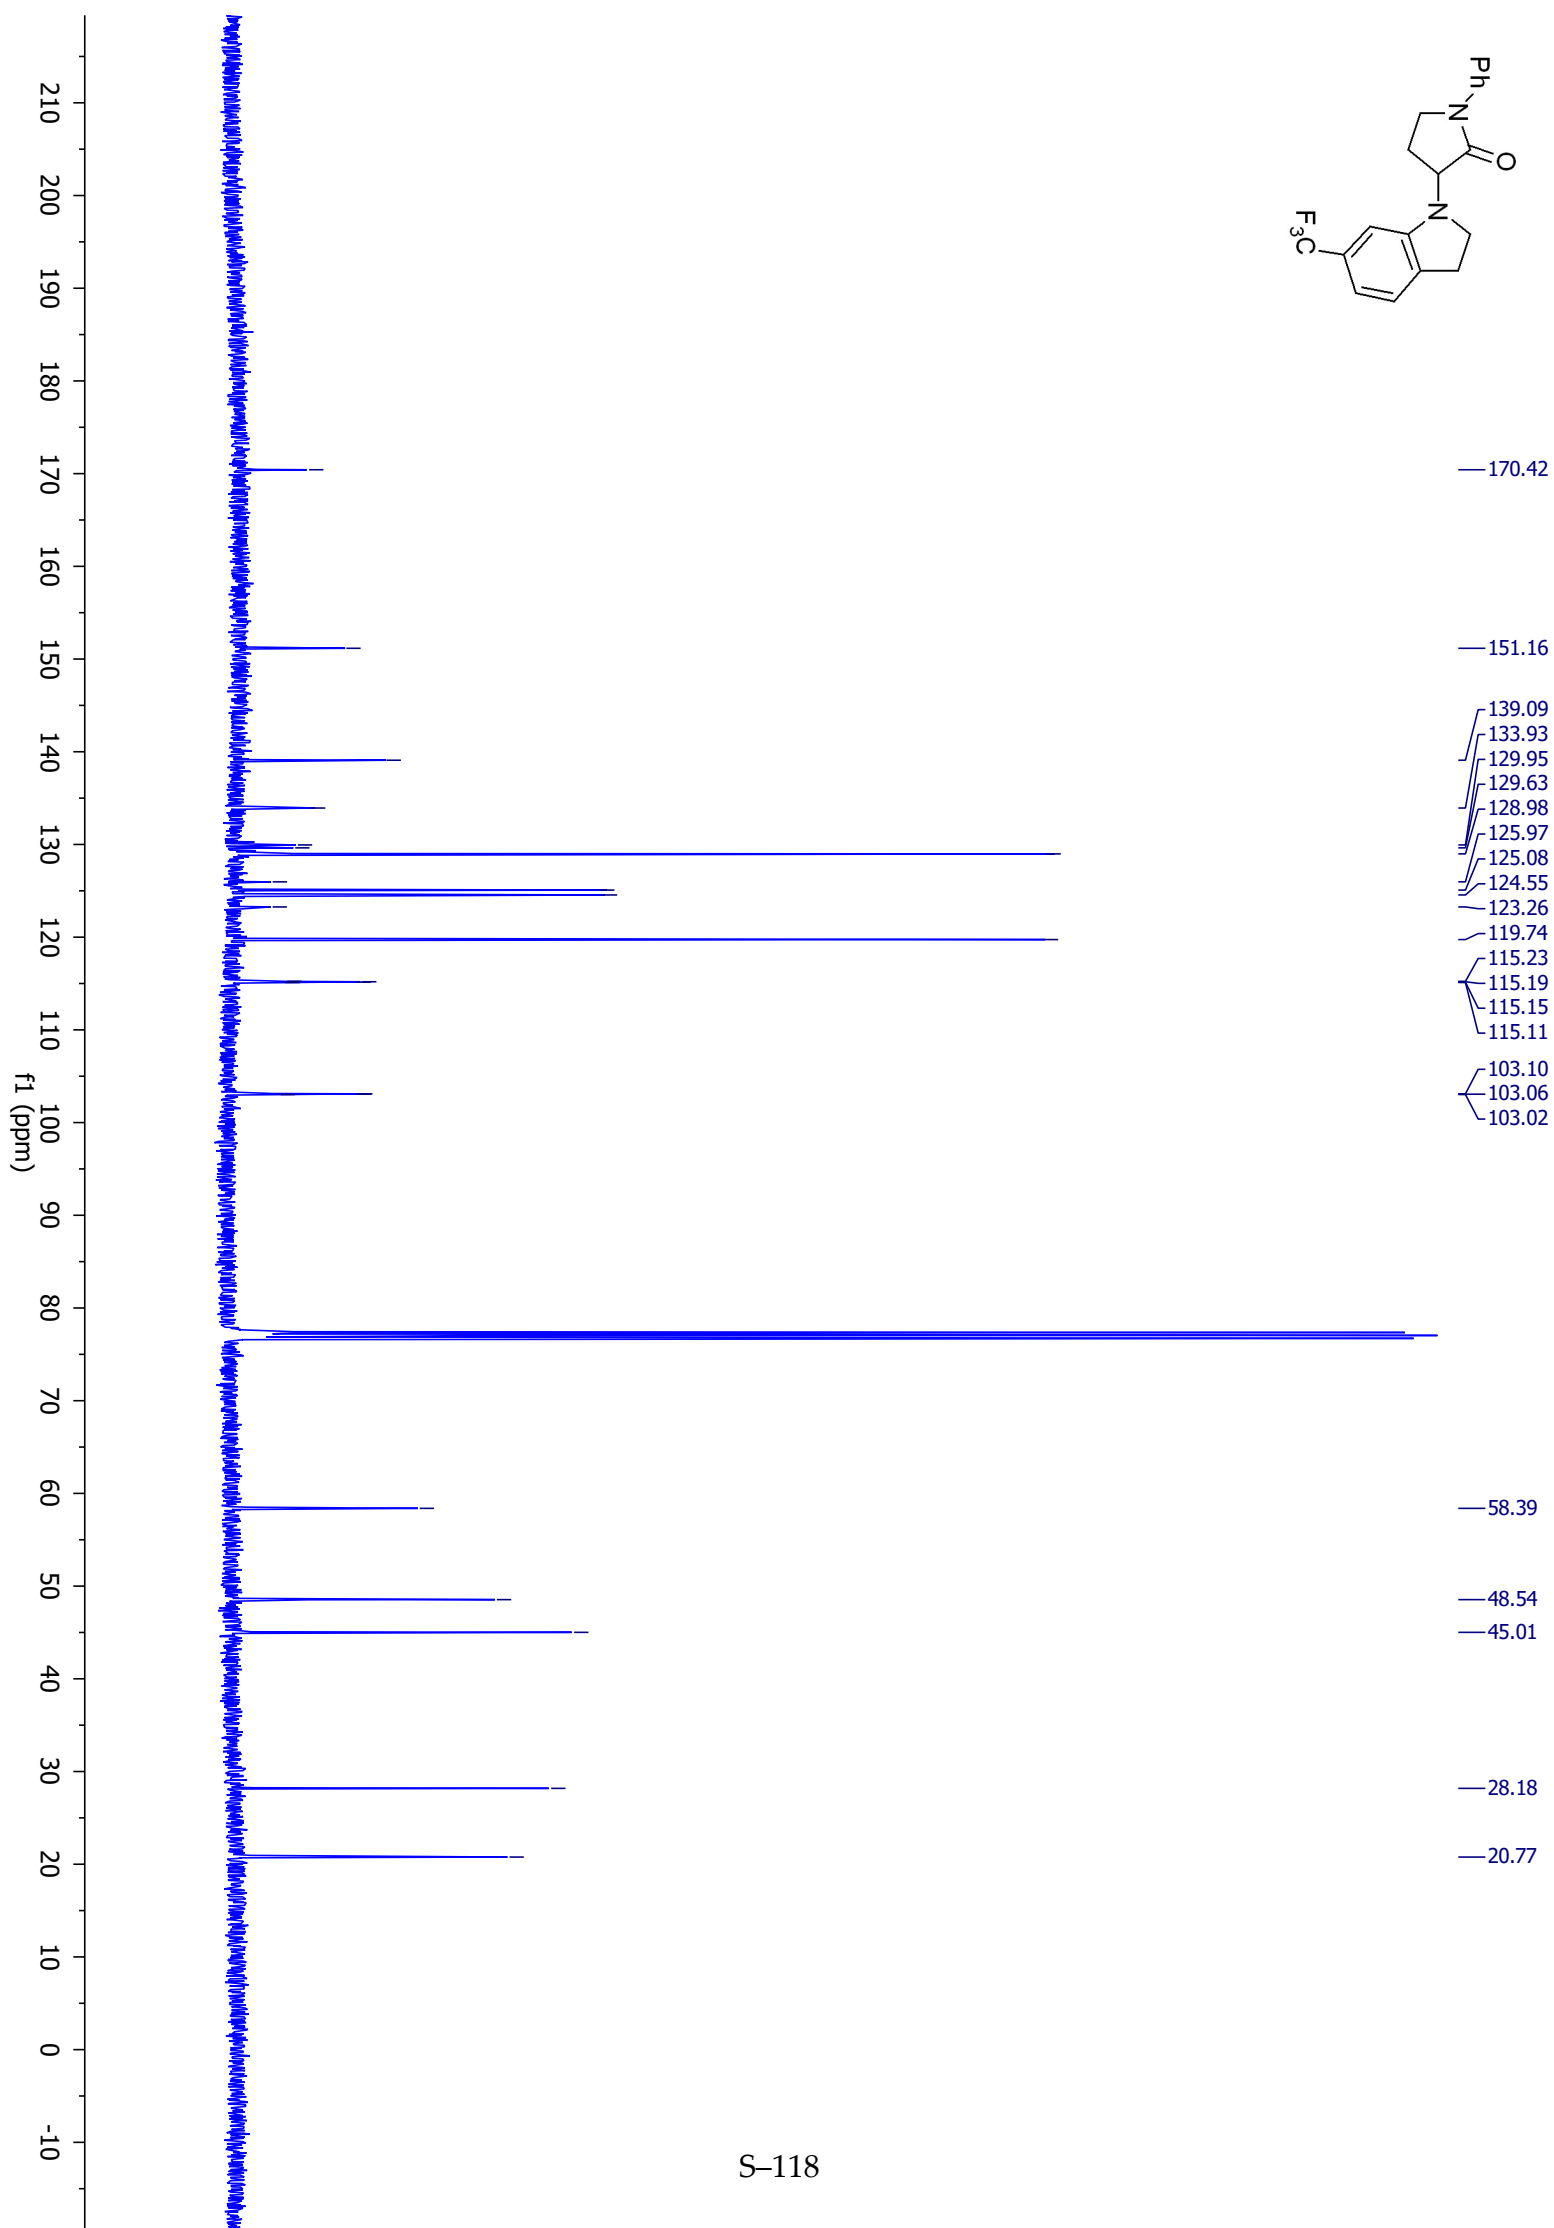

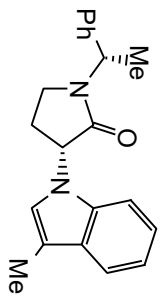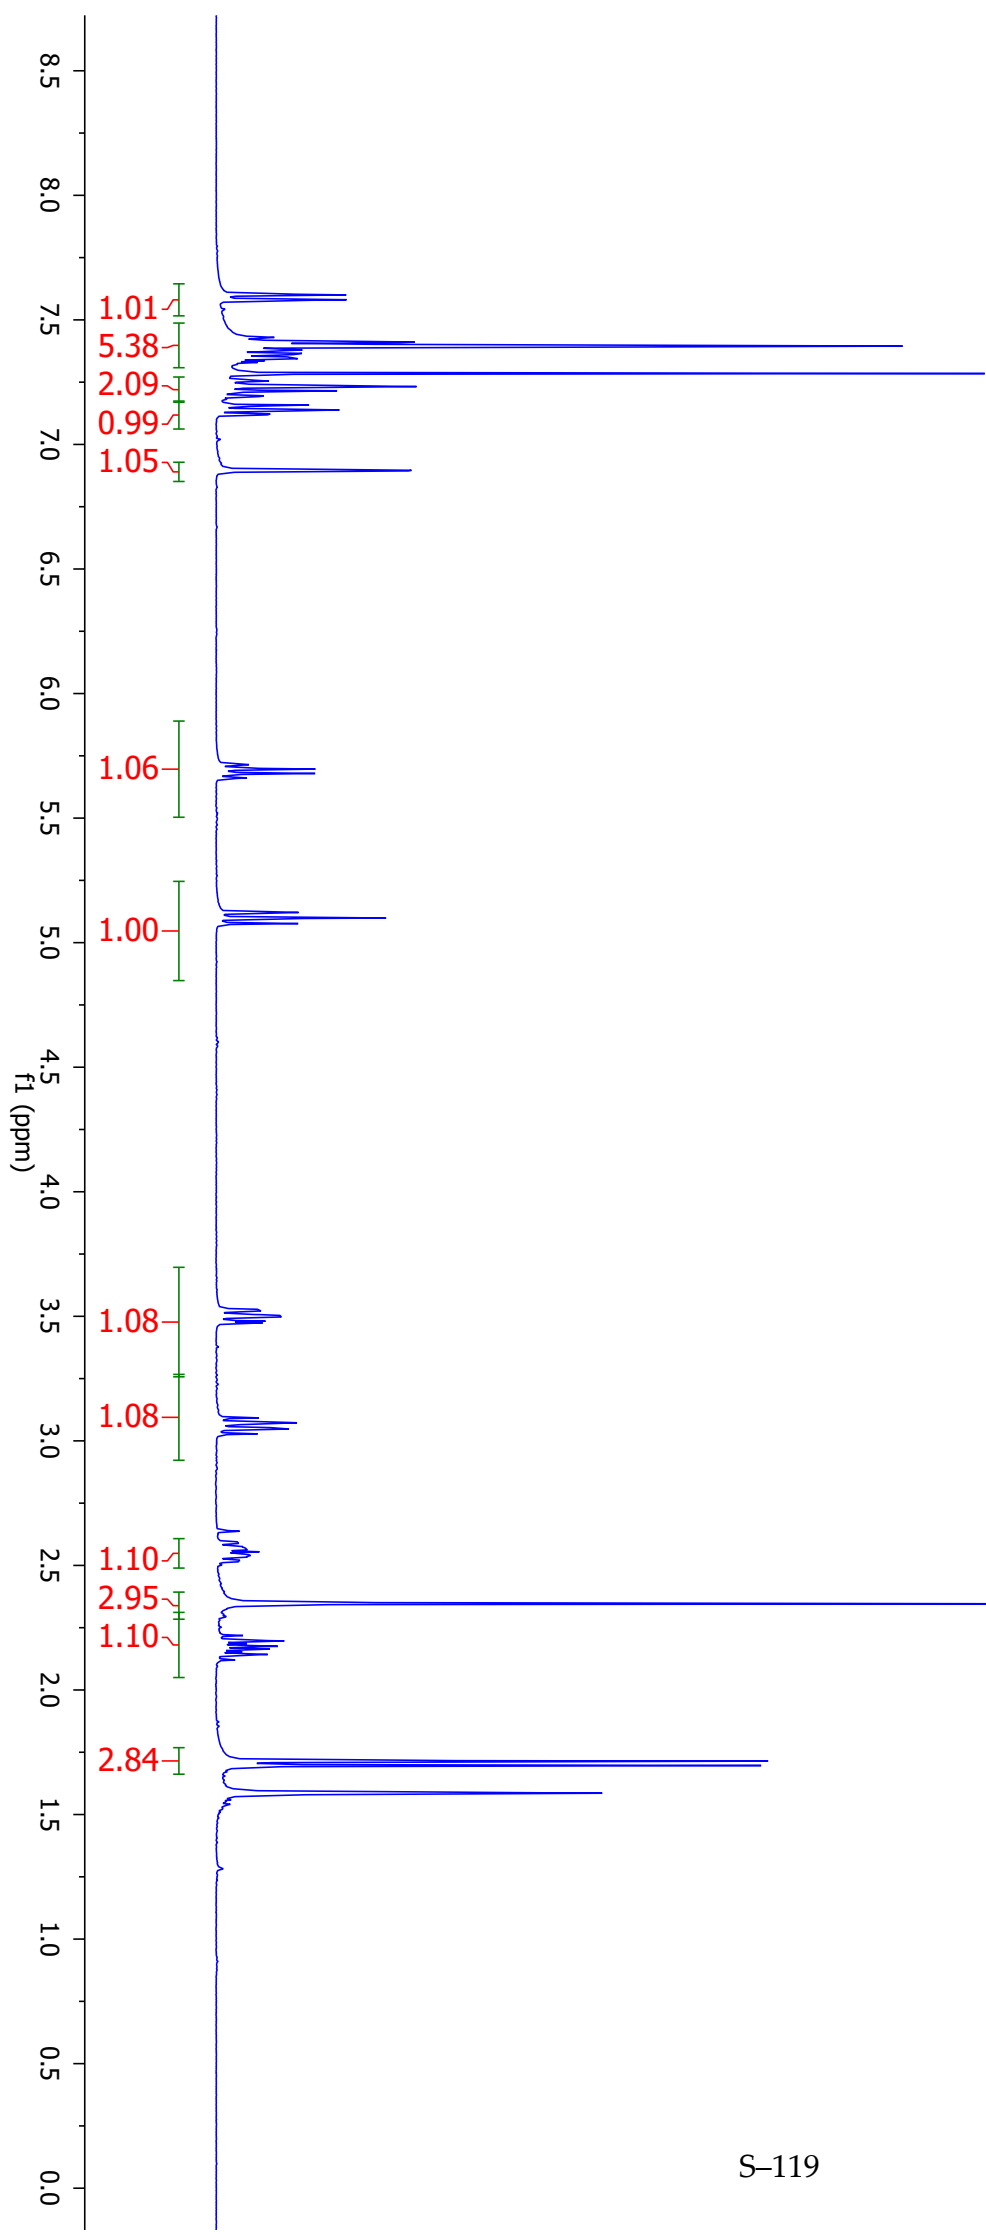

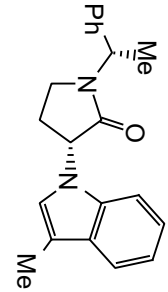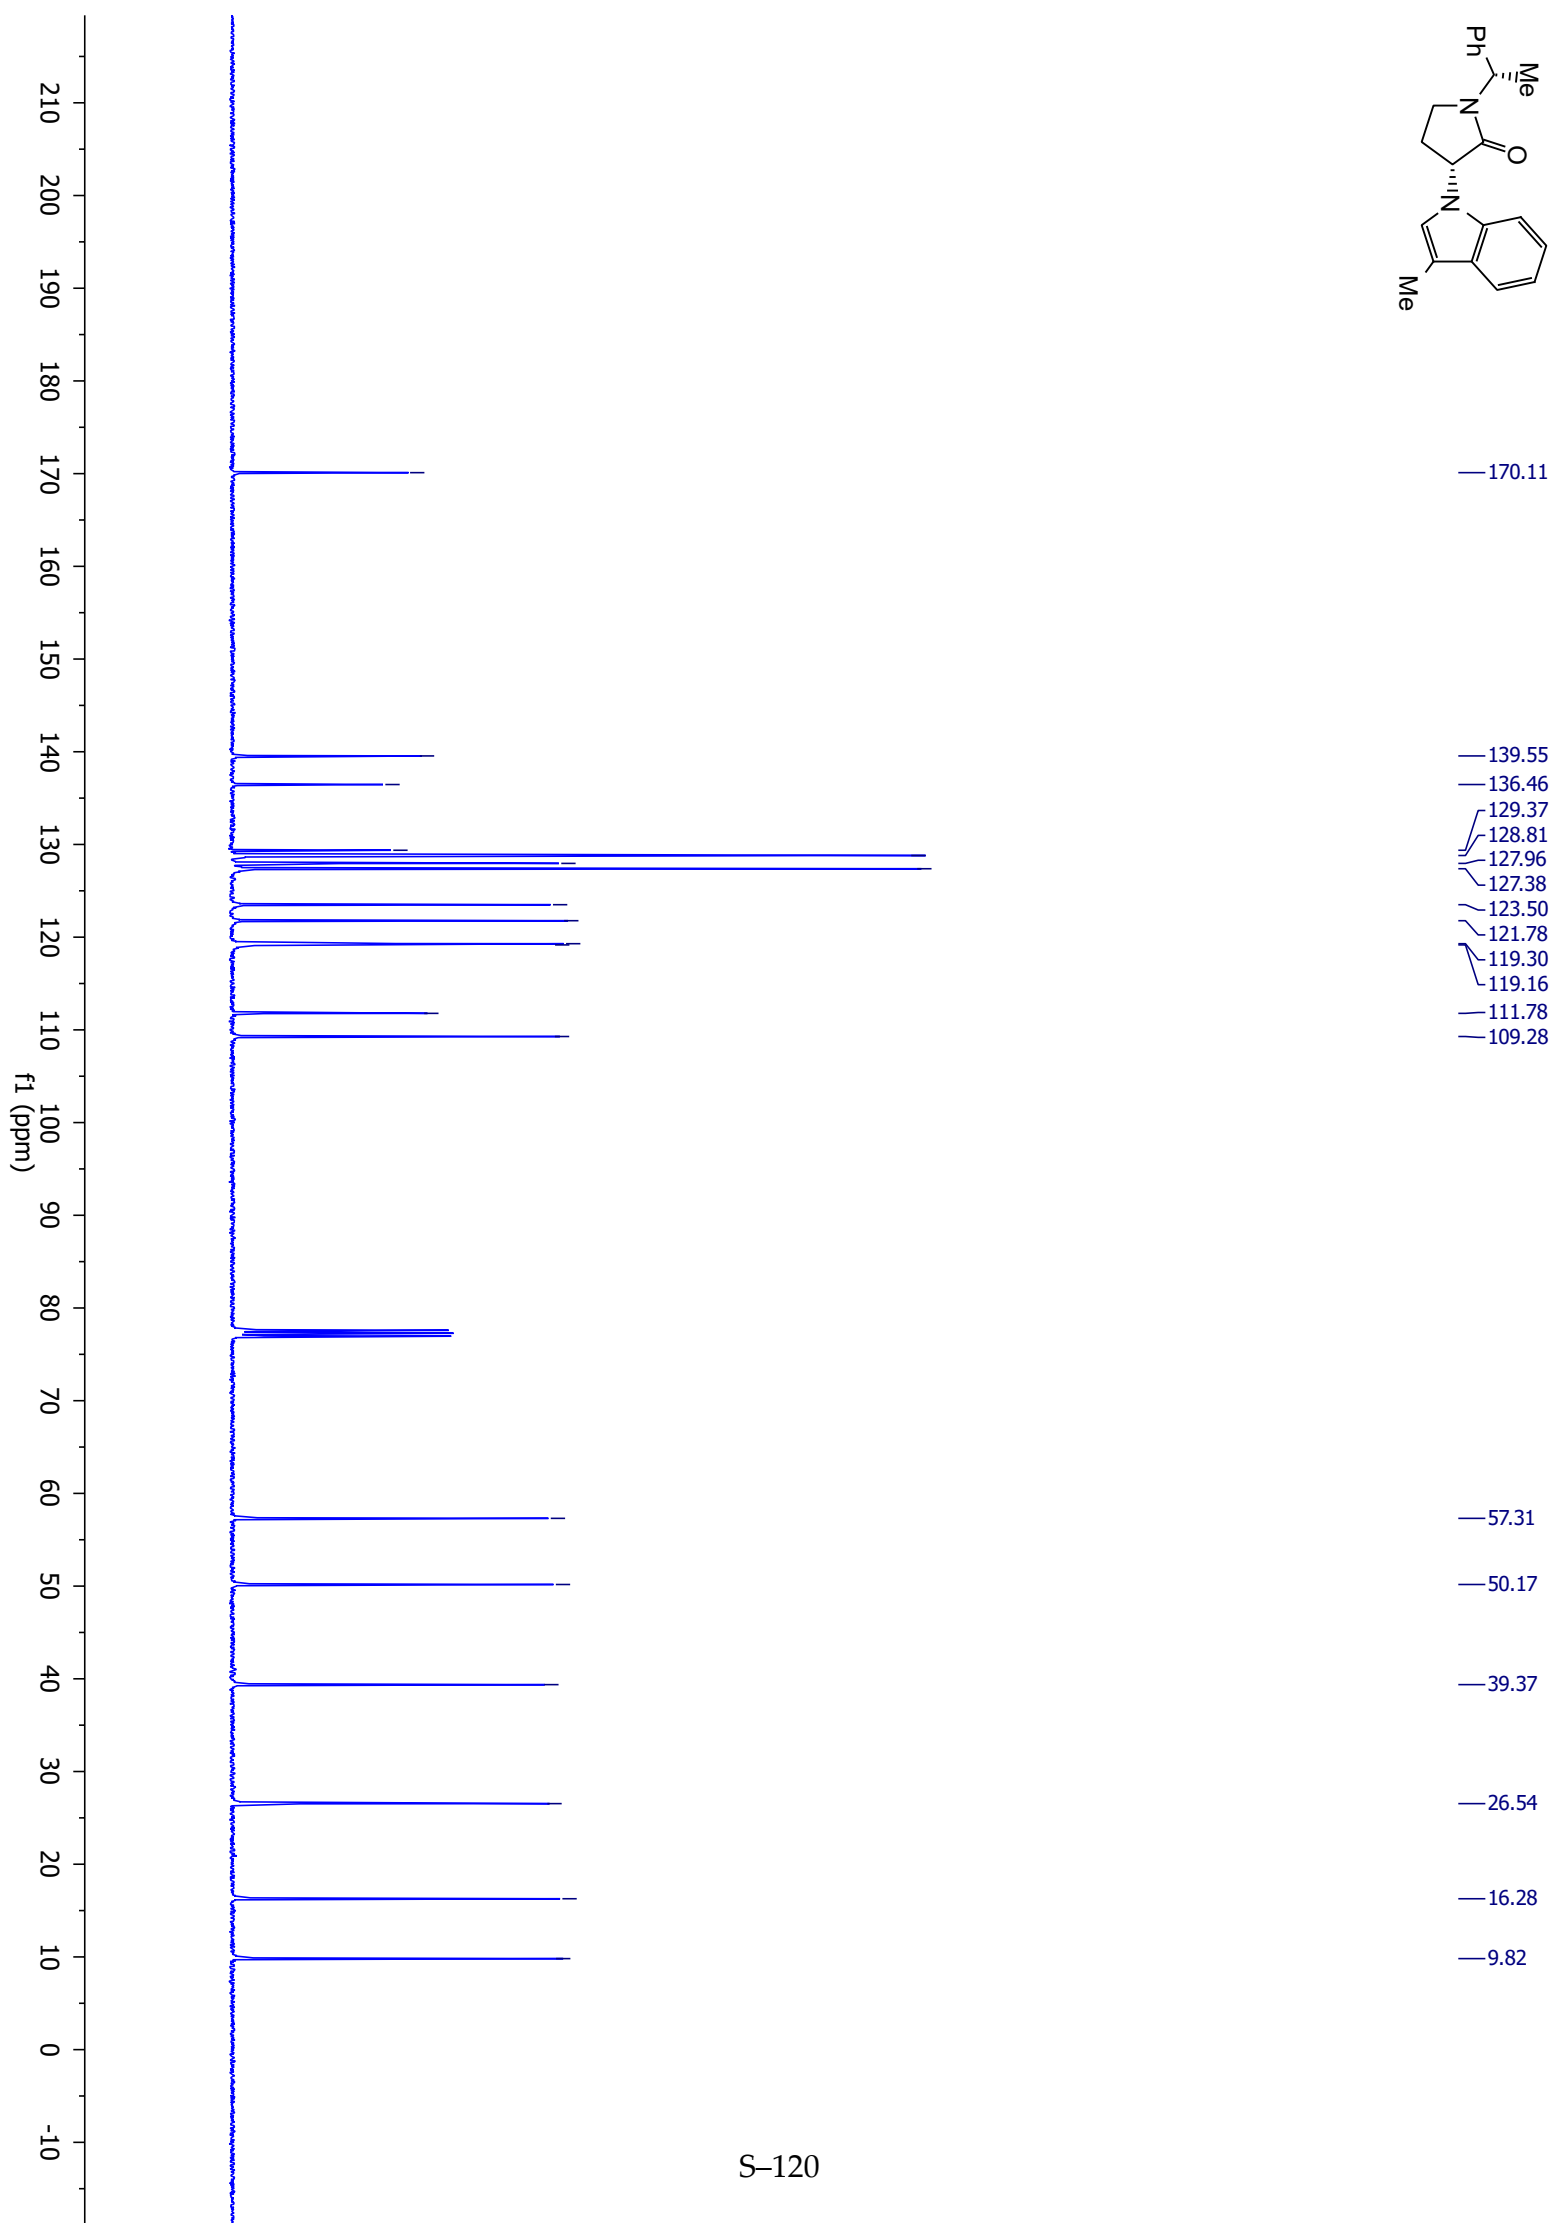



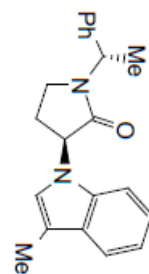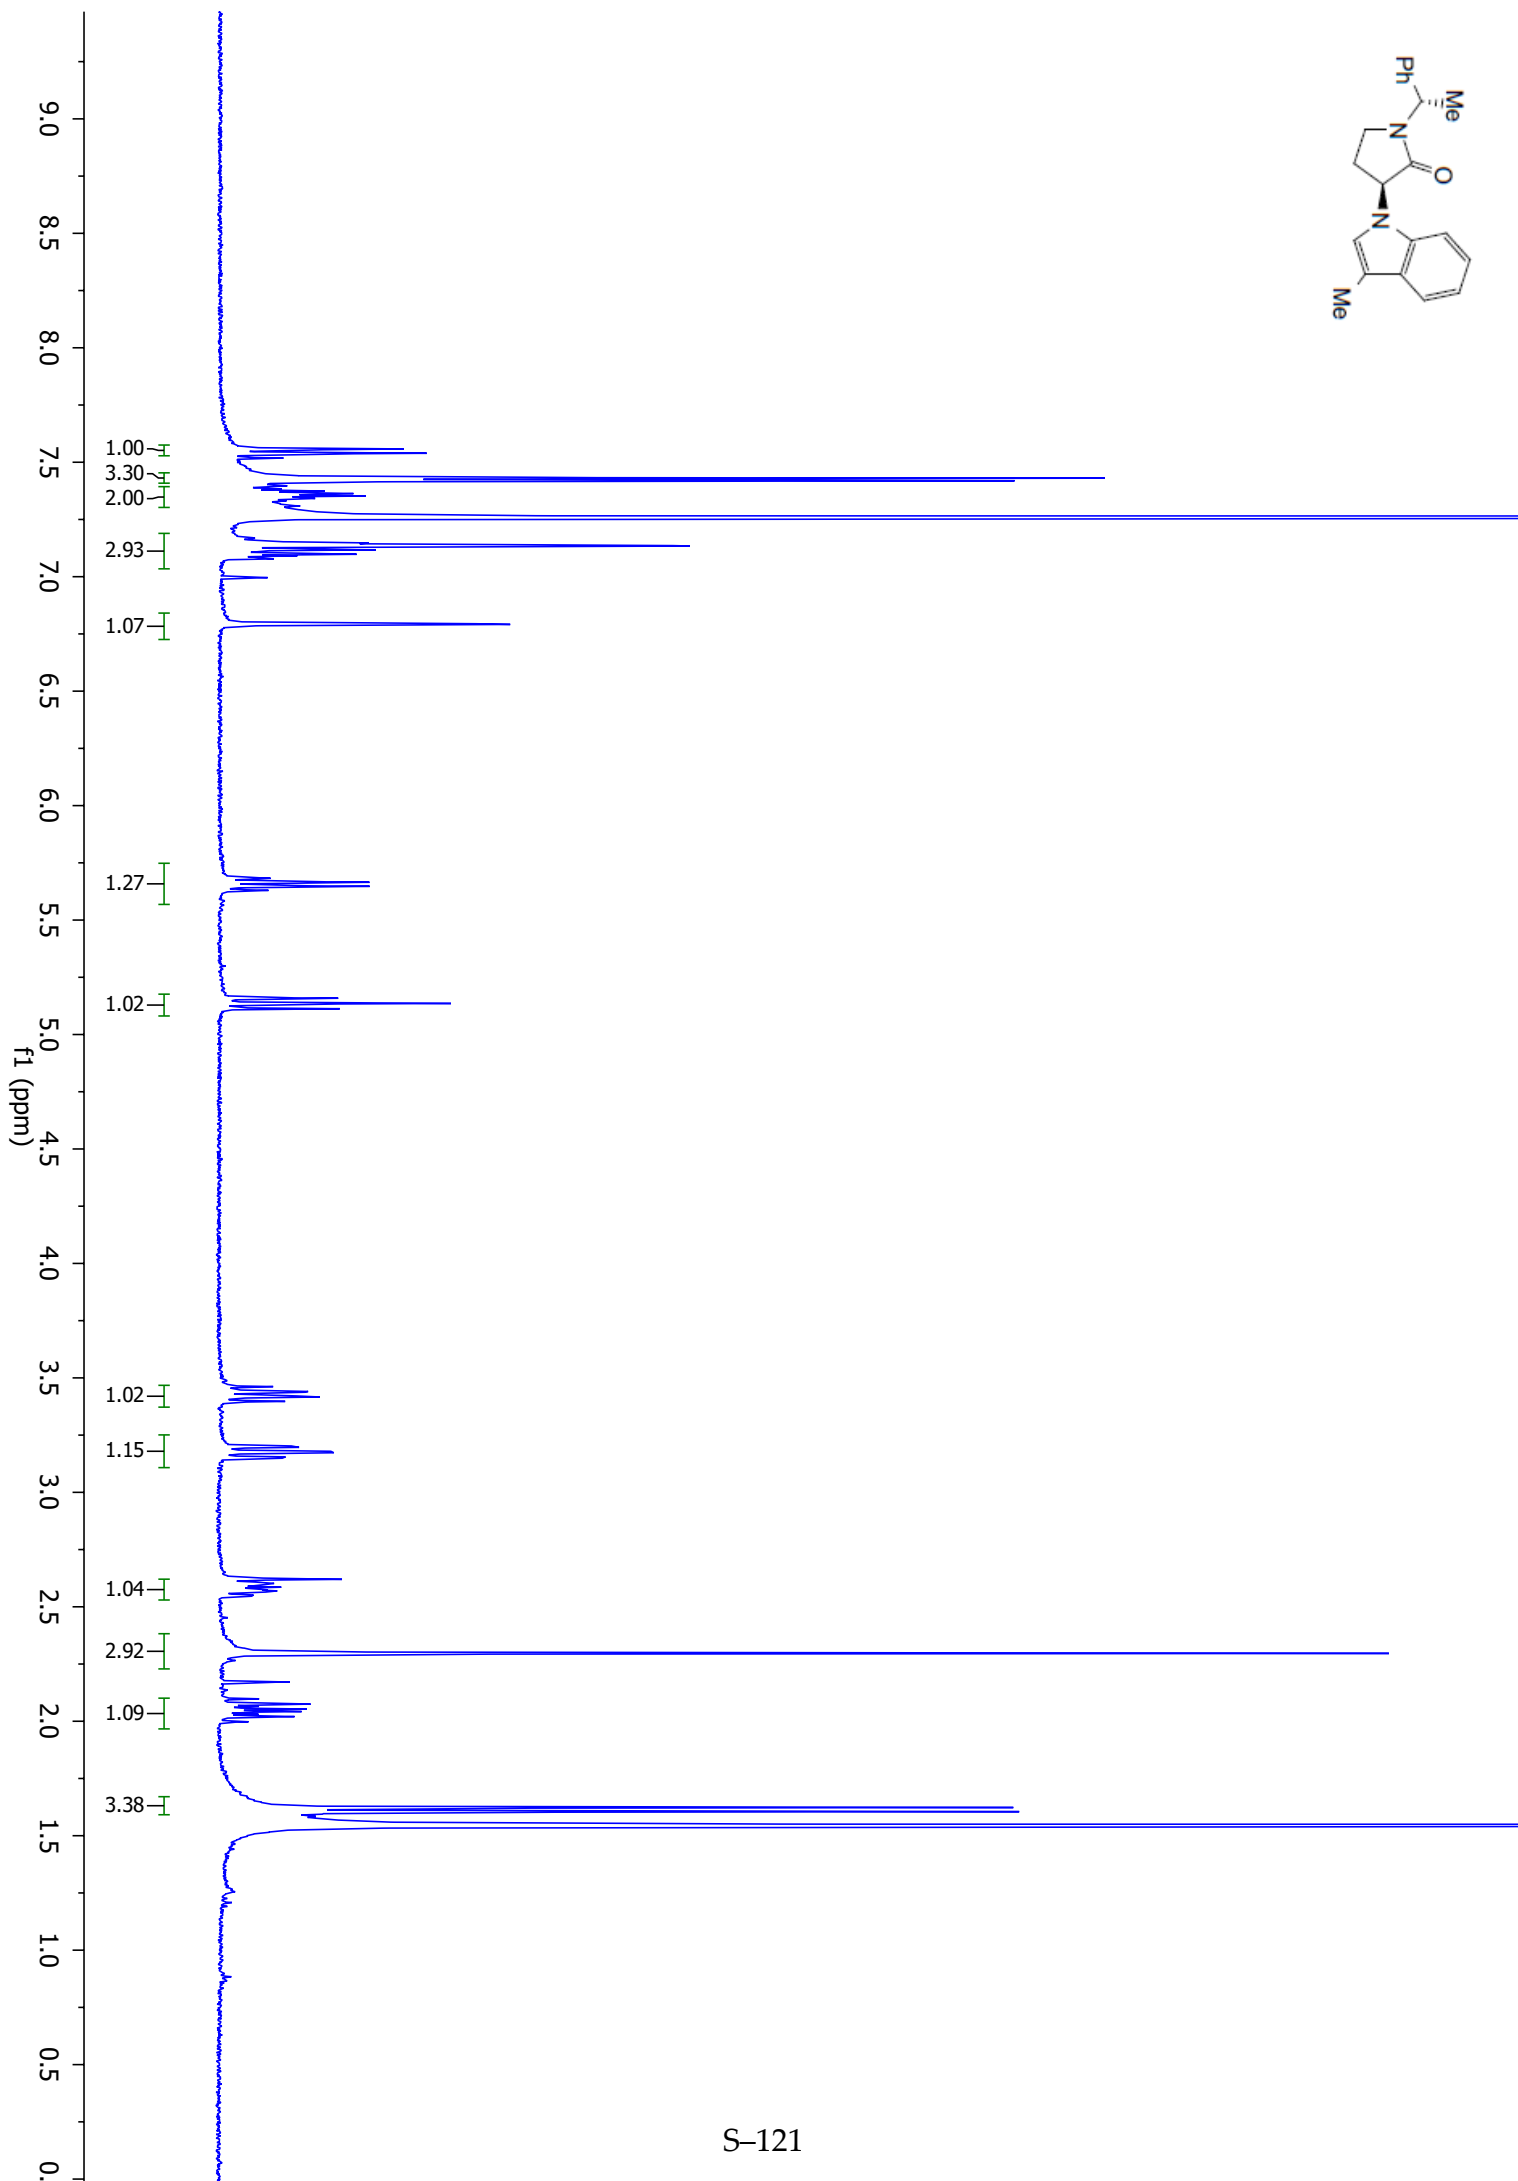

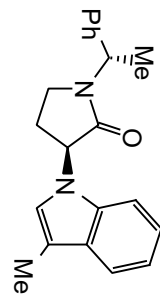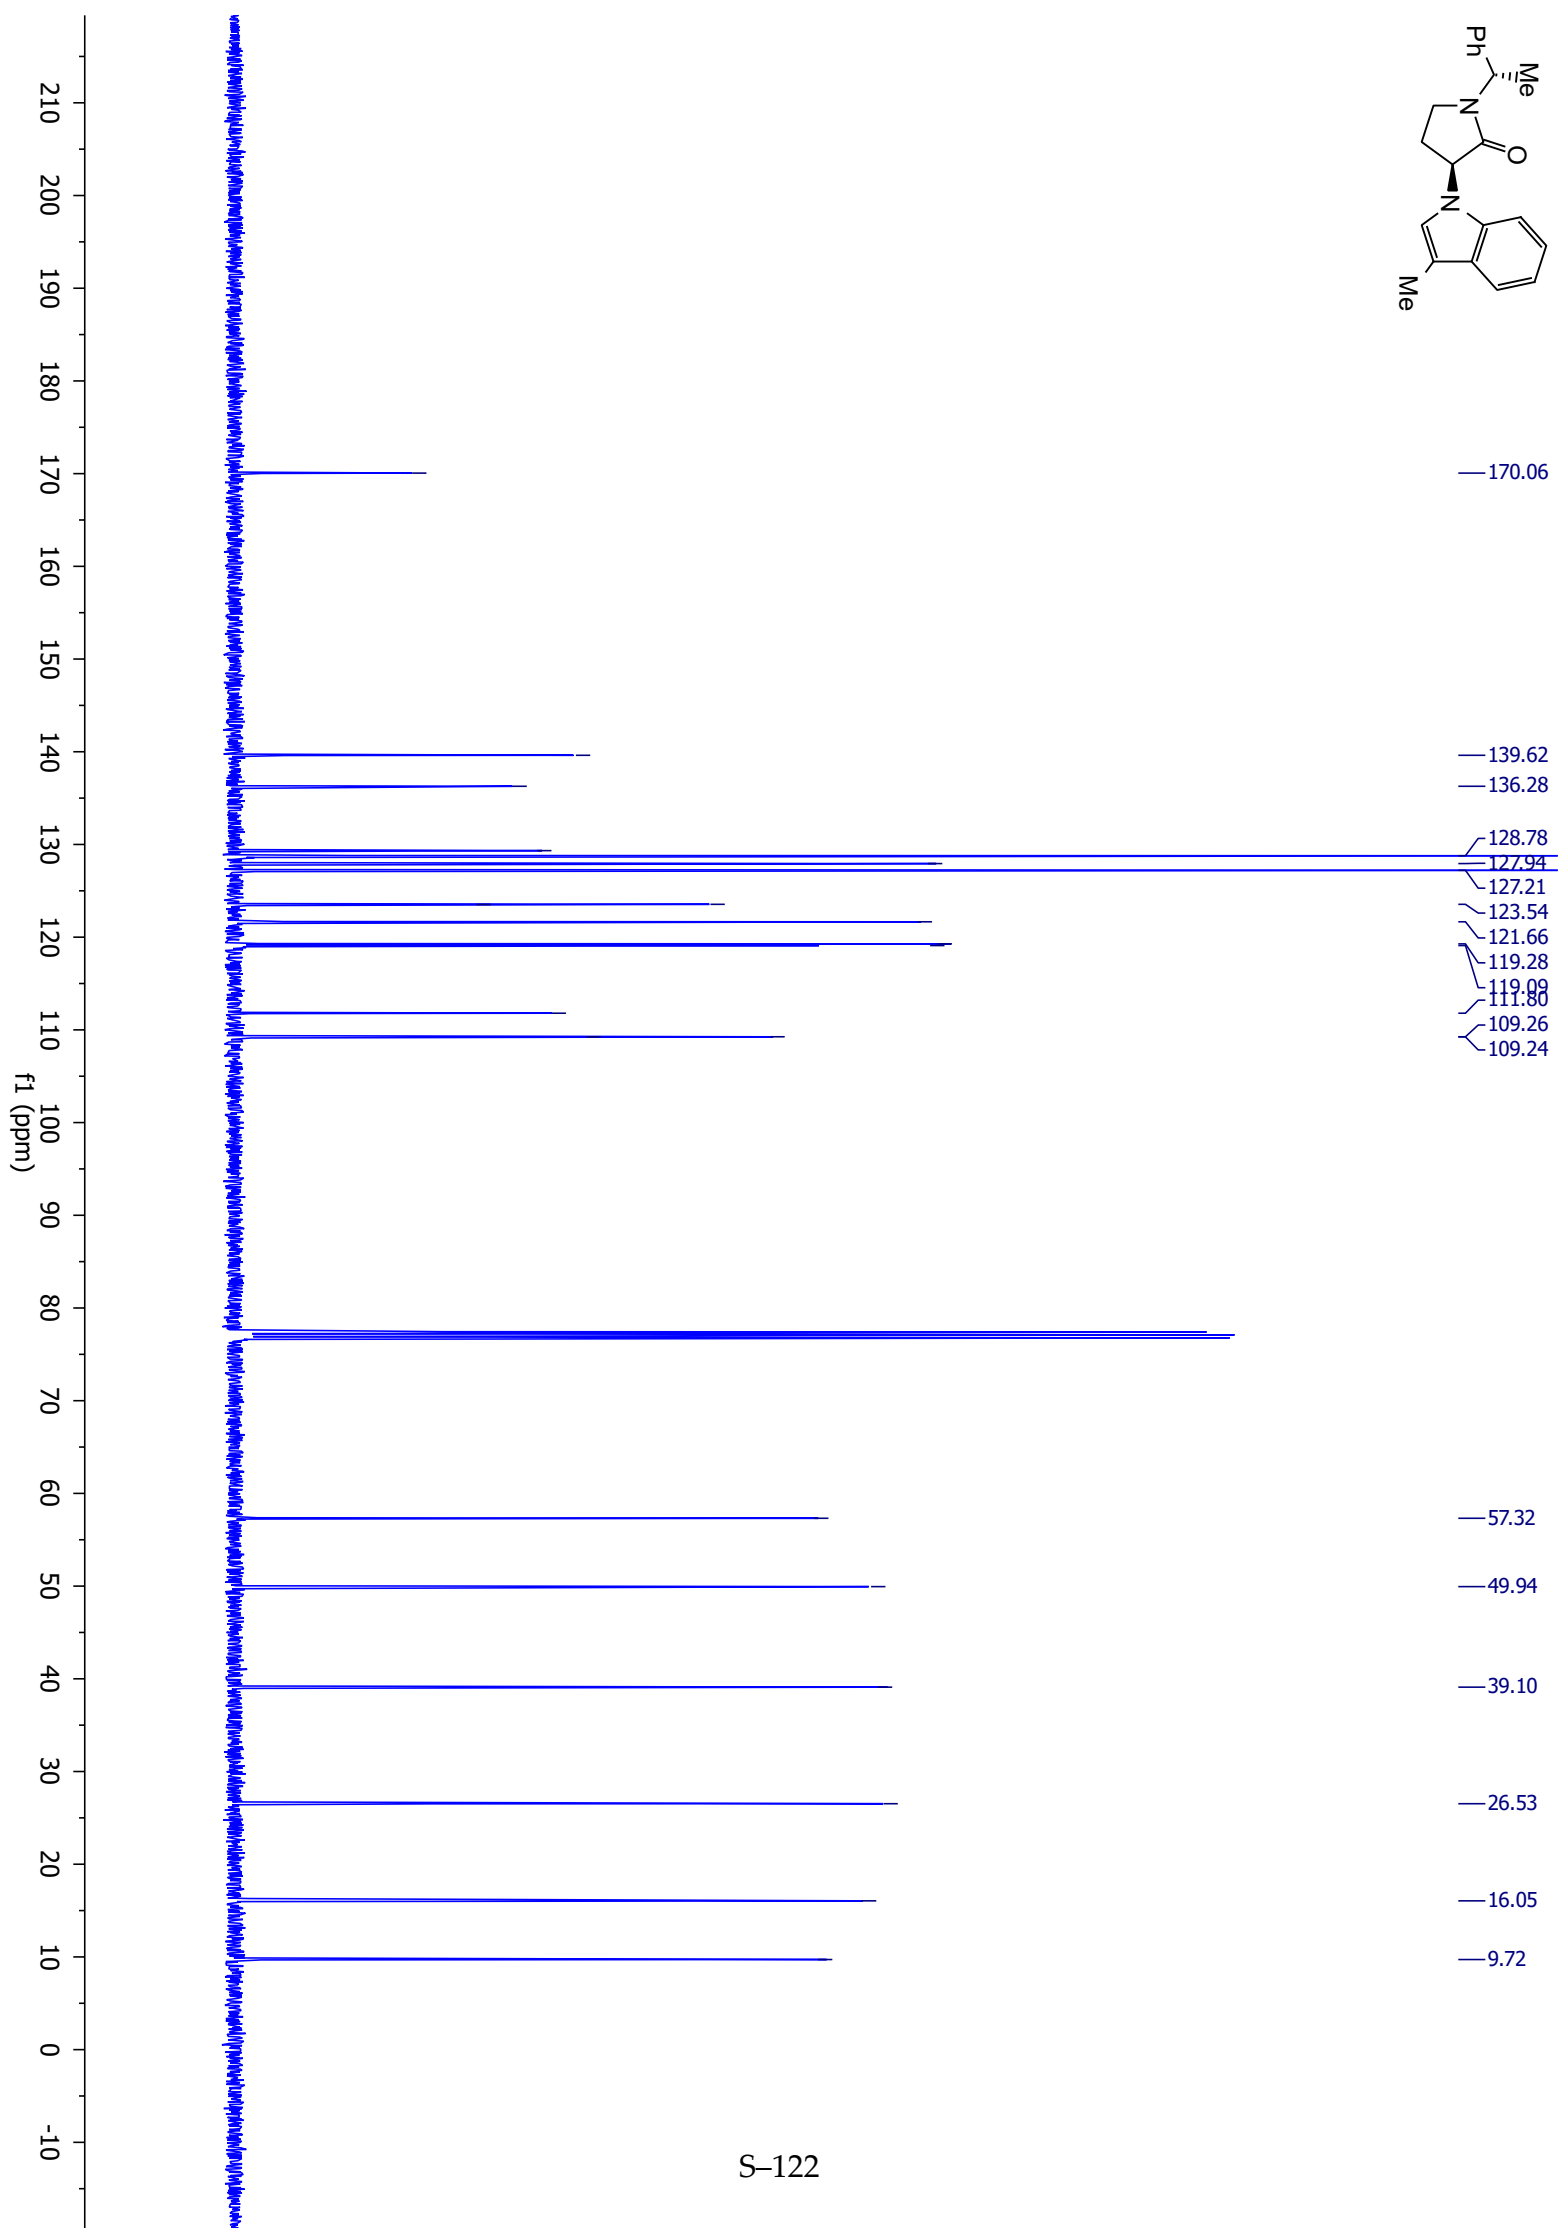

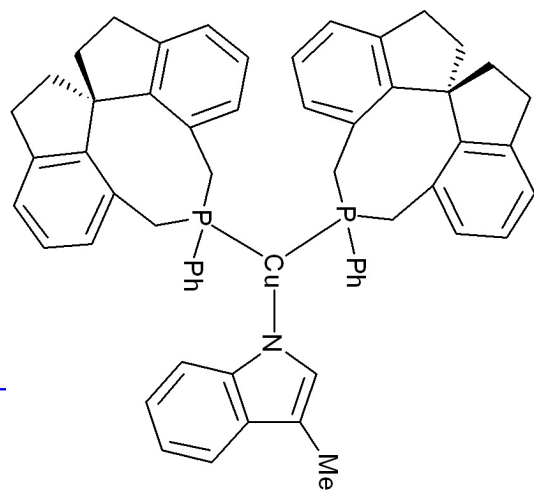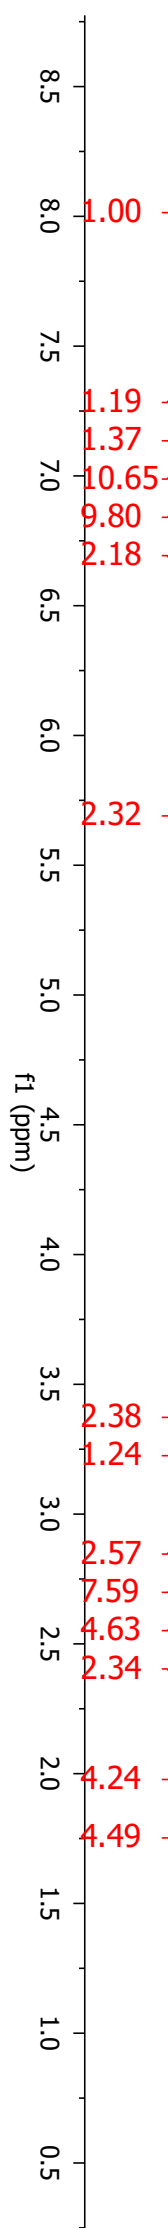

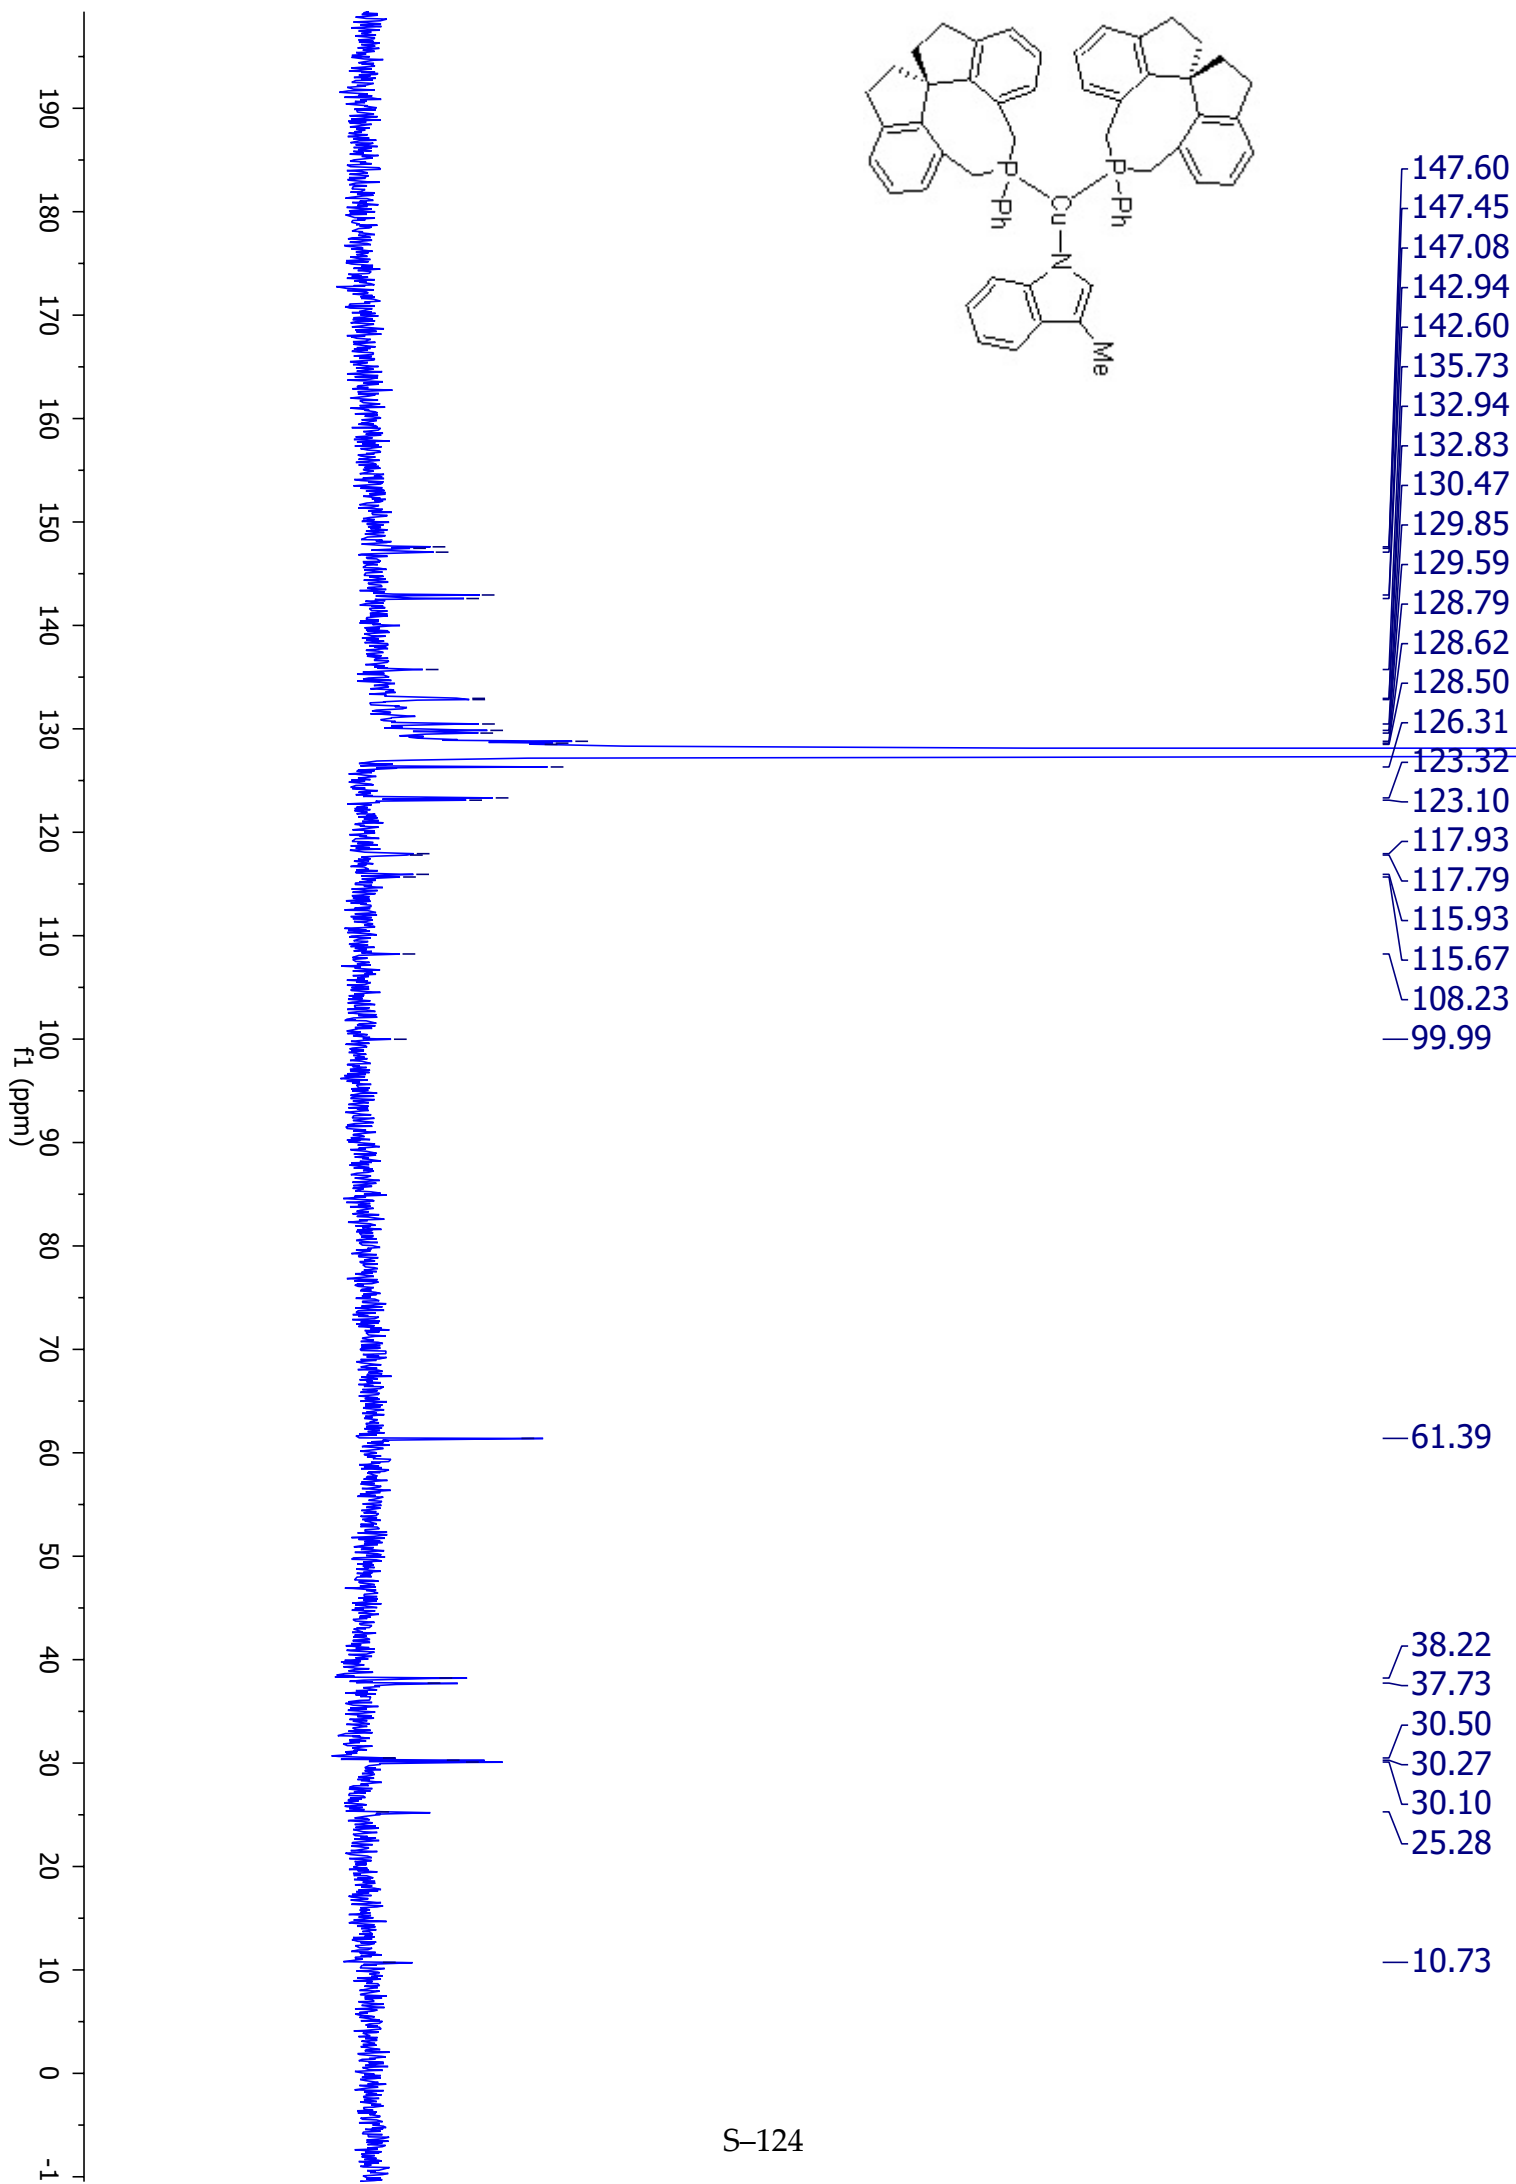

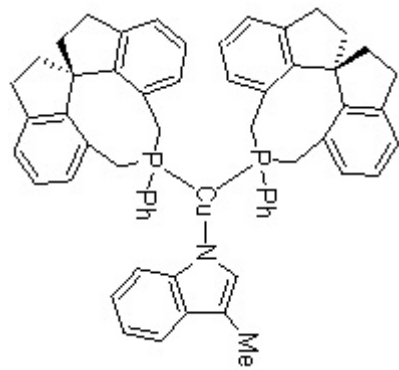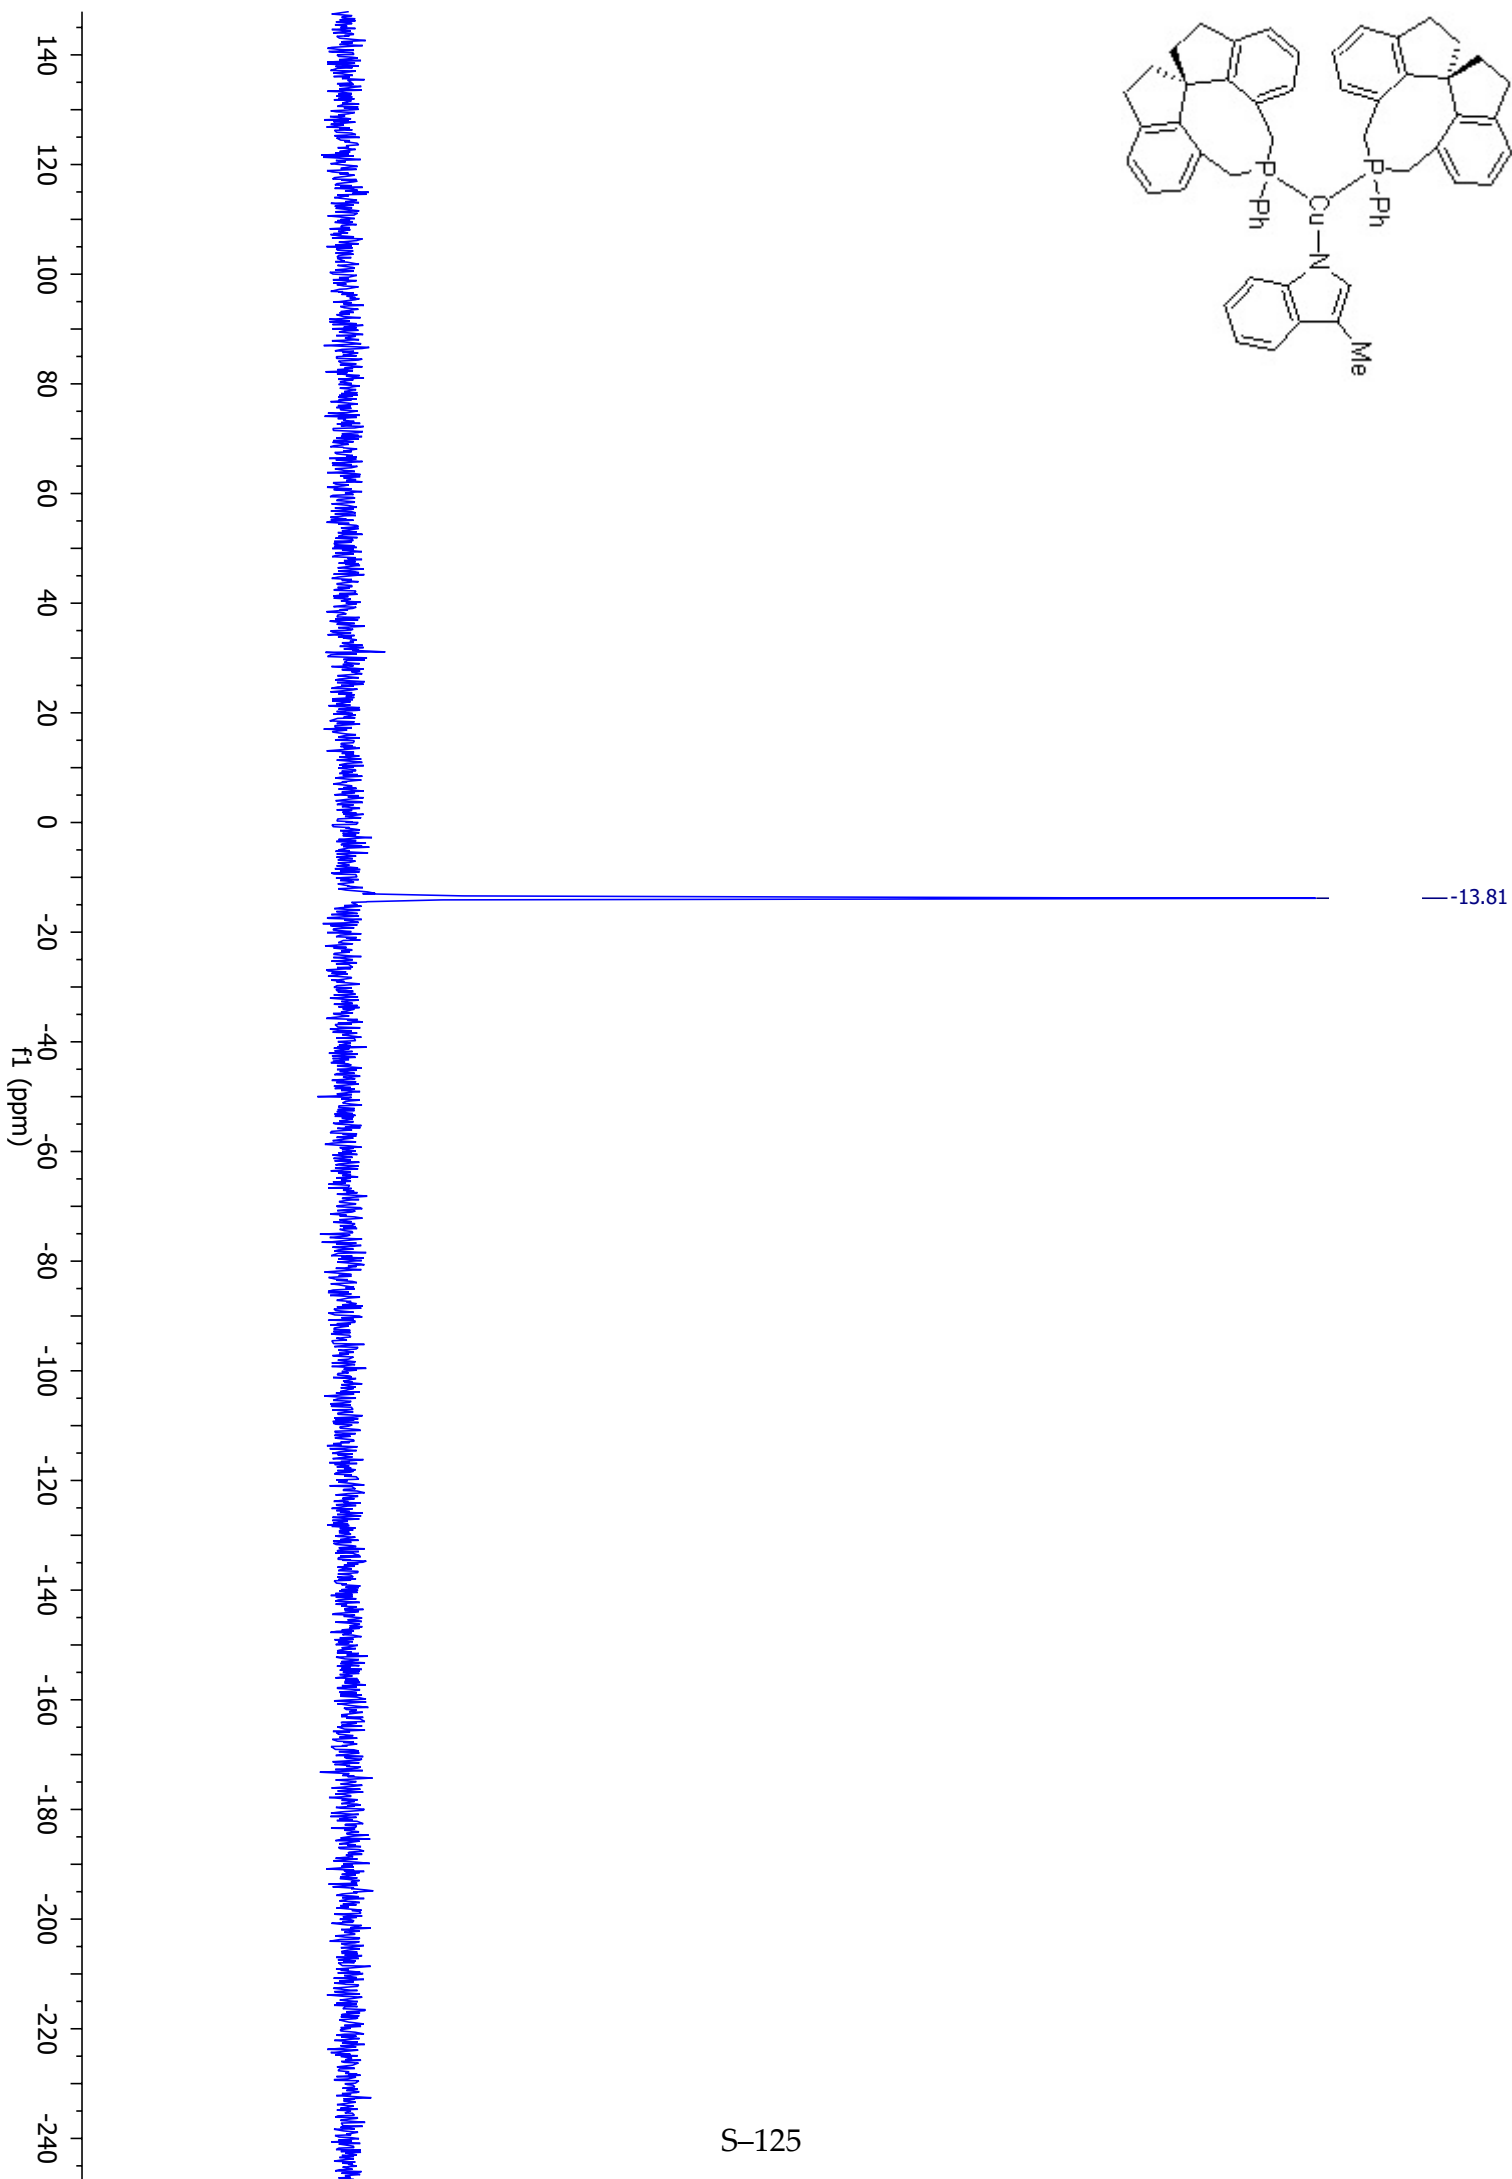

Supplement: NIHMS1557306-supplement-Supplementary_Information.pdf [file NIHMS1557306-supplement-Supplementary_Information.pdf]
